# Supplementary material for: Direct activation of alcohols via perrhenate ester formation for an intramolecular dehydrative Friedel–Crafts reaction
Source: Royal Society of Chemistry journal article supplement (doi:10.1039/d2qo00229a), 2022-01-01

## Supporting Information

### **Direct activation of alcohols via perrhenate ester formation for an intramolecular dehydrative Friedel-Crafts reaction**

Yuzhu Zheng<sup>+</sup>, Xiong Fang<sup>+</sup>, Wen-Hao Deng, Bin Zhao, Rong-Zhen Liao, and Youwei Xie<sup>\*</sup>.

Hubei Key Laboratory of Bioinorganic Chemistry and Materia Medica; Key Laboratory of Material Chemistry for Energy Conversion and Storage, Ministry of Education; Hubei Key Laboratory of Materials Chemistry and Service Failure; School of Chemistry and Chemical Engineering, Huazhong University of Science and Technology, 1037 Luoyu Road, Wuhan 430074, China

<sup>+</sup>These authors contribute equally to this work

Email: [xieyw@hust.edu.cn](mailto:xieyw@hust.edu.cn).

## Table of Contents

|                                                                                                 |    |
|-------------------------------------------------------------------------------------------------|----|
| <i>Table of Contents</i> .....                                                                  | 2  |
| <i>1 General information</i> .....                                                              | 3  |
| <i>2 Optimization of reaction conditions<sup>a</sup></i> .....                                  | 4  |
| <i>3 Additional Substrate Scope</i> .....                                                       | 5  |
| <i>4 Syntheses of starting materials and Spectroscopic Data</i> .....                           | 6  |
| <i>5 Products of intramolecular dehydrative Friedel-Crafts reaction and spectral data</i> ..... | 19 |
| <i>6 Gram scale experiments</i> .....                                                           | 33 |
| <i>7 Synthetic applications and spectral data</i> .....                                         | 34 |
| <i>8 Catalyst Recovery Experiment</i> .....                                                     | 37 |
| <i>9 Control Experiments</i> .....                                                              | 39 |
| <i>10 Kinetic Study</i> .....                                                                   | 40 |
| <i>10.1 Hammett equation</i> .....                                                              | 40 |
| <i>10.2 Reaction rate constant determination</i> .....                                          | 43 |
| <i>10.3 Arrhenius equation</i> .....                                                            | 53 |
| <i>11 DFT results</i> .....                                                                     | 55 |
| <i>12 Cartesian coordinates for all optimized structures</i> .....                              | 59 |
| <i>13 References</i> .....                                                                      | 83 |
| <i>14 NMR spectroscopic data</i> .....                                                          | 85 |

## 1 General information

Re<sub>2</sub>O<sub>7</sub> was purchased from Sigma Aldrich. Unless otherwise stated, Other chemicals used in this manuscript were purchased from Energy chemical company, Bide Pharmatech Ltd, Inno-Chem Ltd, Adamas Company, and Alfa Aesar Company. Other commercially available compounds were used as provided without further purification. HFIP used in the reactions were dried from anhydrous Mg<sub>2</sub>SO<sub>4</sub> and distilled in N<sub>2</sub> prior to use. Other solvents are used after processing in accordance with conventional methods. Unless otherwise noted, all reactions were performed under air. Reactions were monitored by thin layer chromatography (TLC) on silica gel pre-coated plastic sheets (0.2 mm). Visualization was accomplished by irradiation with p-methoxybenzaldehyde, ultraviolet lamp (254 nm), alkaline potassium permanganate solution, iodine cylinder and phosphomolybdic acid solution. Flash column chromatography was performed over silica gel (200-300 mesh). The nuclear magnetic resonance data in this paper is measured by Bruker AVANCE III-400 or Bruker Ascend™ 600MHZ nuclear magnetic resonance instrument at room temperature. The internal standards of <sup>1</sup>H NMR and <sup>13</sup>C NMR are TMS (δ = 0.00 ppm) or CDCl<sub>3</sub> (δ = 7.26 ppm) or CD<sub>2</sub>Cl<sub>2</sub> (δ = 5.31 ppm). Proton spectrum description analysis is as follows: chemical shift (ppm), multiplet analysis (s = singlet, d = doublet, t = triplet, q = quartet, m = multiplet), unidentified coupling the methods are all analyzed by multiple peak processing, and the carbon spectrum is described in ppm. High-resolution mass spectrometry data were measured by a Fourier transform high-resolution mass spectrometer Apex III (7.0 Tesla) FTMS (Bruker, Billerica, MA, USA) (ESI source) or Waters Micromass GCT Premier (EI source).

2 Optimization of reaction conditions<sup>a</sup>

Table S1. Reaction condition optimization.

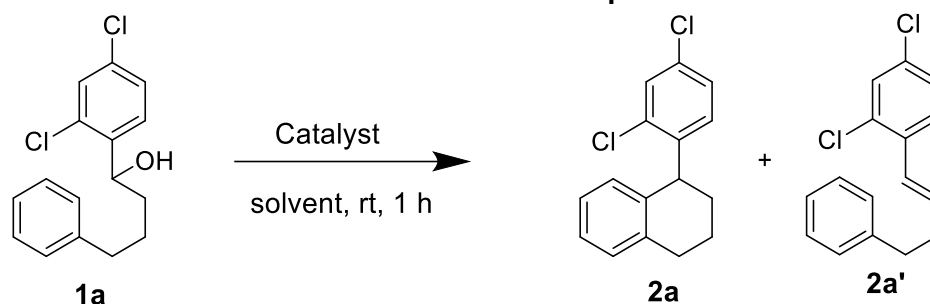

| Entry    | Catalyst                                                                              | Solvent     | Yield. <sup>b</sup> ( <b>2a+2a'</b> ) | Yield <sup>b</sup> ( <b>2a</b> ) |
|----------|---------------------------------------------------------------------------------------|-------------|---------------------------------------|----------------------------------|
| 1        | 1 mol% V <sub>2</sub> O <sub>5</sub> (H <sub>4</sub> V <sub>6</sub> O <sub>17</sub> ) | HFIP        | 32%                                   | 32%                              |
| 2        | 10 mol% CF <sub>3</sub> CO <sub>2</sub> H                                             | HFIP        | 12%                                   | 12%                              |
| <b>3</b> | <b>0.1 mol% Re<sub>2</sub>O<sub>7</sub> (HReO<sub>4</sub>)</b>                        | <b>HFIP</b> | <b>96%</b>                            | <b>96%</b>                       |
| 4        | 10 mol% TsOH                                                                          | HFIP        | 67%                                   | 67%                              |
| 5        | 10 mol% H <sub>2</sub> SO <sub>4</sub>                                                | HFIP        | 0%                                    | 0%                               |
| 6        | 10 mol% HCl                                                                           | HFIP        | 58%                                   | 58%                              |
| 7        | 10 mol% TfOH                                                                          | HFIP        | 92%                                   | 92%                              |
| 8        | 10 mol% FeCl <sub>3</sub>                                                             | HFIP        | 0%                                    | 0%                               |
| 9        | 10 mol% SnCl <sub>4</sub>                                                             | HFIP        | 65%                                   | 65%                              |
| 10       | 0.1 mol% Re <sub>2</sub> O <sub>7</sub>                                               | DCM         | 42%                                   | 17%                              |
| 11       | 0.1 mol% Re <sub>2</sub> O <sub>7</sub>                                               | Toluene     | 22%                                   | 7%                               |
| 12       | 0.1 mol% Re <sub>2</sub> O <sub>7</sub>                                               | AcOEt       | 0%                                    | 0%                               |
| 13       | 0.1 mol% Re <sub>2</sub> O <sub>7</sub>                                               | 1,4-Dioxane | 0%                                    | 0%                               |
| 14       | 0.1 mol% Re <sub>2</sub> O <sub>7</sub>                                               | MeCN        | 17%                                   | 4%                               |
| 15       | 0.1 mol% Re <sub>2</sub> O <sub>7</sub>                                               | DMF         | 0%                                    | 0%                               |
| 16       | 0.1 mol% Re <sub>2</sub> O <sub>7</sub>                                               | MeOH        | 0%                                    | 0%                               |
| 17       | 1 mol% TfOH                                                                           | HFIP        | 94%                                   | 94%                              |
| 18       | 0.1 mol% TfOH                                                                         | HFIP        | 93%                                   | 93%                              |

[a] Unless otherwise specified, the reaction was carried out under air atmosphere, with Re<sub>2</sub>O<sub>7</sub>•SiO<sub>2</sub> (0.0001 mmol), solvent (0.2 mL), and **1a** (29.5 mg, 0.1 mmol) in a sealed tube for 1 hour, after which 20 μl Et<sub>3</sub>N was added to quench the reaction; [b] yield is determined by analyzing HPLC traces of the reaction mixture with 1,3,5-trimethyl benzene as the internal standard.

**Note:** TfOH was used as a 5.0 mM solution in HFIP, if a 5.0 mM solution of TfOH in Et<sub>2</sub>O was used, catalytic efficiency was much lower.



### 3 Additional Substrate Scope

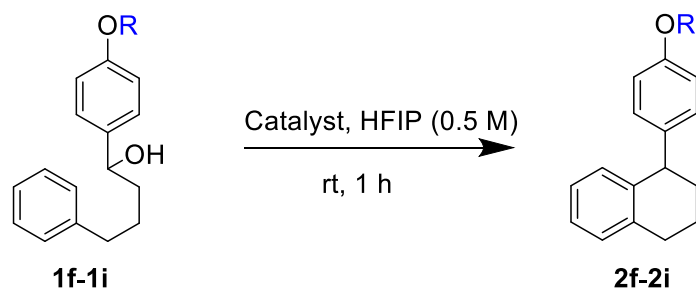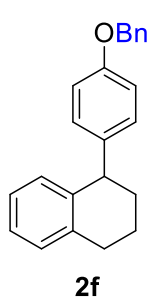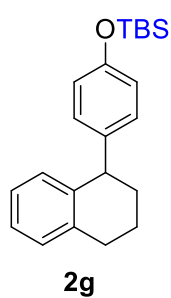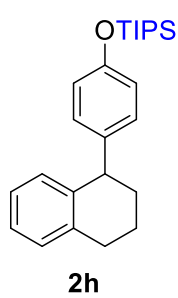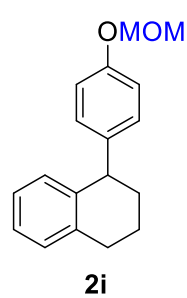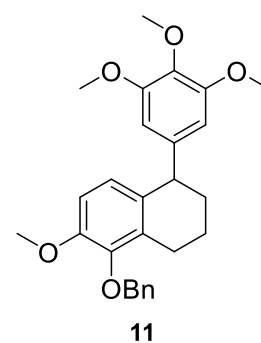

**0.1% Re<sub>2</sub>O<sub>7</sub>:** 83%  
**10% TfOH:** no **2f**

**0.1% Re<sub>2</sub>O<sub>7</sub>:** 78%  
**10% TfOH:** no **2g**

**0.1% Re<sub>2</sub>O<sub>7</sub>:** 53%  
**10% TfOH:** no **2h**

**0.1% Re<sub>2</sub>O<sub>7</sub>:** 93%  
**10% TfOH:** no **2i**

**0.1% Re<sub>2</sub>O<sub>7</sub>:** 96%  
**10% TfOH:** no **11**

**Figure S1. Efficiency comparison between TfOH and Rhenium catalysts.**

**Comments:** When the highly acidic and corrosive triflic acid was used to catalyze the dehydrative Friedel-Crafts reactions, the high acidity and corrosiveness of TfOH made it less tolerant of acid-sensitive substrates (**1f**, **1g**, **1h**, **1i**, **10**), while Re<sub>2</sub>O<sub>7</sub> did not have this problem.

## 4 Syntheses of starting materials and Spectroscopic Data

All substrates were prepared by following literature procedures or the procedures provided in this manuscript.  $^1\text{H}$  NMR,  $^{13}\text{C}$  NMR and HRMS were provided for all compounds not previously reported, for cases where HRMS were not obtained after several tries, GC-MS were provided. Only  $^1\text{H}$  NMR (and  $^{13}\text{C}$  NMR) were provided for known compounds to show excellent agreement with reported data.

### 4.1 General synthetic method A for the preparation of reaction substrates

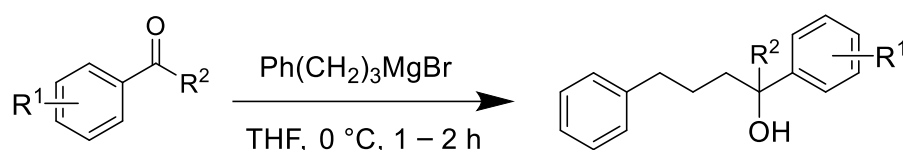

**Figure S2. General synthetic method A**

Add Mg metal (6 mmol, 1.2 equiv, 0.144 g), THF (20.0 mL) and a small crystal of iodine to a flame-dried Schlenk flask under argon. Dilute the 1-bromo-3-phenylpropane (6.0 mmol, 1.2 equiv, 1.195 g) with THF (3.0 mL) and add 1.0 mL of the solution to the above reaction mixture. Stir the solution to boil. Add the remaining bromide solution dropwise to the reaction mixture. Allow the reaction to stir at room temperature for 1–2 hours. The freshly made alkyl magnesium bromide (1.2 equiv) was added dropwisely to aldehyde (1 equiv) in anhydrous THF at 0 °C, and the reaction was stirred for 1–2 hours. After quenching with saturated  $\text{NH}_4\text{Cl}$  solution, the reaction mixture was extracted with EtOAc, and the organic layer was dried over anhydrous  $\text{Na}_2\text{SO}_4$ , and concentrated under vacuum. Purification by flash column chromatography on silica gel afforded the corresponding alcohol.

### 4.2 General synthetic method B for the preparation of reaction substrates

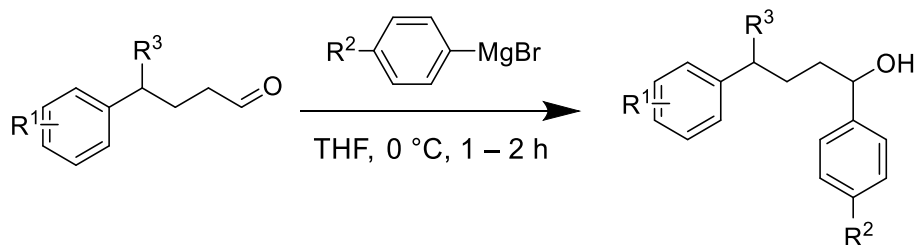

**Figure S3. General synthetic method B**

Add Mg metal (6 mmol, 1.2 equiv, 0.144 g), THF (20.0 mL) and a small crystal of iodine to a flame-dried Schlenk flask under argon. Dilute the aryl bromide (6.0 mmol, 1.2 equiv.) with THF (3.0 mL) and add 1.0 mL of the solution to the above reaction mixture. Stir the solution to boil. Add the remaining bromide solution dropwisely to the reaction mixture. Allow the reaction to stir at room temperature for 1-

2 hours. The freshly made aryl magnesium bromide (1.2 equiv.) was added dropwisely to aldehyde (1 equiv.) in anhydrous THF at 0 °C, and the reaction was stirred for 1-2 hours. After quenching with saturated NH<sub>4</sub>Cl solution, the reaction mixture was extracted with EtOAc, and the organic layer was dried over anhydrous Na<sub>2</sub>SO<sub>4</sub>, and concentrated under cacuum. Purification by flash column chromatography on silica gel afforded the corresponding alcohol.

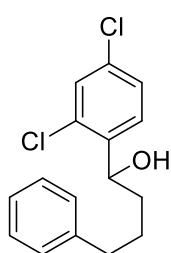

**1a:** 1-(2,4-dichlorophenyl)-4-phenyl-1-butanol. **1a** was synthesized according to the general synthetic **method A**.

White solid. <sup>1</sup>H NMR (400 MHz, Chloroform-d) δ 7.48 (d, *J* = 8.4 Hz, 1H), 7.33 (d, *J* = 2.1 Hz, 1H), 7.26 (t, *J* = 3.8 Hz, 5H), 7.18 (t, *J* = 6.8 Hz, 3H), 5.11 (m, 1H), 2.65 (t, *J* = 7.2 Hz, 2H), 1.86 – 1.69 (m, 4H); <sup>13</sup>C NMR (101 MHz, Chloroform-d) δ 142.2, 140.9, 133.5, 132.5, 129.2, 128.5, 128.5, 128.3, 127.6, 125.9, 70.3, 37.2, 35.7, 27.5; **HRMS**

*m/z* (ESI): calcd. for C<sub>16</sub>H<sub>16</sub>Cl<sub>2</sub>O [M+Cl]<sup>-</sup>: 329.0272; found: 329.0274.

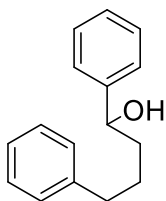

**1b:** 1,4-diphenylbutan-1-ol.<sup>[1]</sup> **1b** was synthesized according to the general synthetic **method A**.

White solid. <sup>1</sup>H NMR (400 MHz, Chloroform-d) δ 7.34 (m, 4H), 7.30 – 7.23 (m, 3H), 7.20 – 7.14 (m, 3H), 4.69 (t, *J* = 7.2 Hz, 1H), 2.63 (t, *J* = 7.2 Hz, 2H), 1.89 – 1.58 (m, 4H).

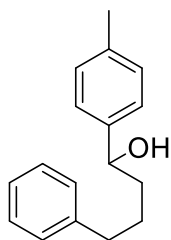

**1c:** 4-phenyl-1-(p-tolyl)butan-1-ol.<sup>[2]</sup> **1c** was synthesized according to the general synthetic **method A**.

White solid. <sup>1</sup>H NMR (400 MHz, Chloroform-d) δ 7.29 – 7.24 (m, 2H), 7.23 – 7.20 (m, 2H), 7.19 – 7.12 (m, 5H), 4.67 – 4.64 (m, 1H), 2.63 (t, *J* = 7.2 Hz, 2H), 2.34 (s, 3H), 1.90 – 1.68 (m, 4H).

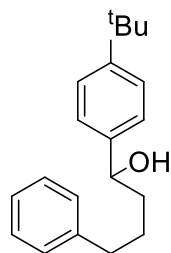

**1d:** 1-(4-(tert-butyl)phenyl)-4-phenylbutan-1-ol. **1d** was synthesized according to the general synthetic **method A**.

Colorless oil. <sup>1</sup>H NMR (400 MHz, Chloroform-d) δ 7.54 – 7.47 (m, 2H), 7.44 – 7.37 (m, 4H), 7.37 – 7.32 (m, 3H), 4.74 – 4.71 (m, 1H), 2.82 – 2.77 (m, 3H), 2.03 – 1.73 (m, 4H), 1.52 (s, 9H). <sup>13</sup>C NMR (101 MHz, Chloroform-d) δ 150.2, 142.3, 141.8, 128.4, 128.3, 125.7, 125.2, 74.0, 38.4, 35.8, 34.4, 31.4, 27.6. **HRMS** *m/z* (ESI): calcd. for C<sub>20</sub>H<sub>26</sub>NaO

[M+Na]<sup>+</sup>: 305.1876; found: 305.1877.

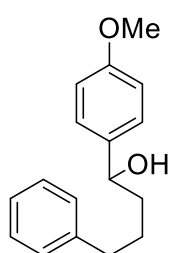

**1e:** 1-(4-methoxyphenyl)-4-phenylbutan-1-ol.<sup>[2]</sup> **1e** was synthesized according to the general synthetic **method A**.

White solid. <sup>1</sup>H NMR (400 MHz, Chloroform-*d*) δ 7.26 – 7.13 (m, 7H), 6.87 (d, *J* = 8.6 Hz, 2H), 4.62 (t, *J* = 7.1 Hz, 1H), 3.81 (s, 3H), 2.65 (t, *J* = 7.1 Hz, 2H), 2.09 – 1.72 (m, 3H), 1.61 – 1.57 (m, 1H).

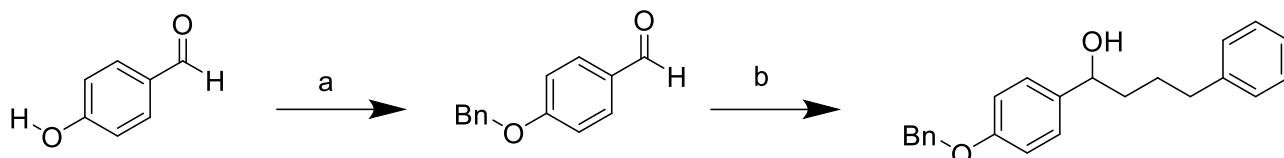

Reaction Condition:

a) Cs<sub>2</sub>CO<sub>3</sub>, CH<sub>3</sub>CN, BnBr, rt, 12 h, 53%. b) Ph(CH<sub>2</sub>)<sub>3</sub>MgBr, THF, 0 °C, 1 h, 78%.

#### Figure S4. Synthesis of 1f

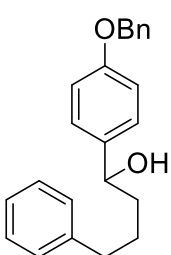

**1f:** 1-(4-(benzyloxy)phenyl)-4-phenylbutan-1-ol. **1f** was synthesized via the route shown in **Figure S4**.

White solid. <sup>1</sup>H NMR (400 MHz, Chloroform-*d*) δ 7.52 – 7.42 (m, 4H), 7.40 (d, *J* = 7.0 Hz, 1H), 7.35 – 7.27 (m, 4H), 7.23 – 7.21 (m, 3H), 7.01 (d, *J* = 8.0 Hz, 2H), 5.10 (s, 2H), 4.64 (t, *J* = 6.1 Hz, 1H), 2.68 (t, *J* = 7.2 Hz, 2H), 2.19 – 2.04 (m, 1H), 1.92 – 1.75 (m, 3H), 1.98 – 1.59 (m, 1H). <sup>13</sup>C NMR (101 MHz, Chloroform-*d*) δ 158.3, 142.4, 137.2, 137.1, 128.6, 128.5, 128.4, 128.0, 127.5, 127.2, 125.8, 114.8, 74.1, 70.1, 38.5, 35.8, 27.7. **HRMS** *m/z* (ESI): calcd. for C<sub>23</sub>H<sub>24</sub>NaO<sub>2</sub> [M+Na]<sup>+</sup>: 355.1669; found: 355.1679.

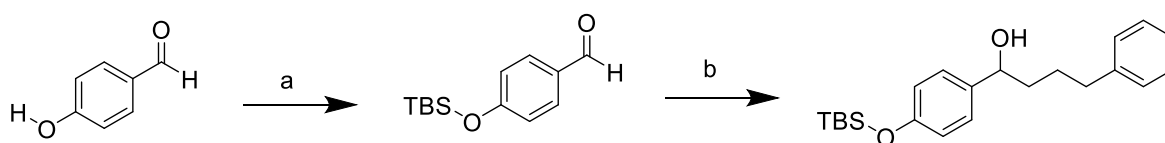

Reaction Condition:

a) Et<sub>3</sub>N, DCM, TBSCl, rt, 12 h, 90%. b) Ph(CH<sub>2</sub>)<sub>3</sub>MgBr, THF, 0 °C, 1 h, 81%.

#### Figure S5. Synthesis of 1g

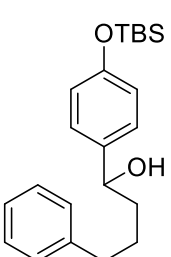

**1g:** 1-(4-(tert-butyldimethylsilyloxy)phenyl)-4-phenylbutan-1-ol. **1g** was synthesized via the route shown in **Figure S5**.

Colorless oil. <sup>1</sup>H NMR (600 MHz, Chloroform-*d*) δ 7.28 (t, *J* = 7.5 Hz, 2H), 7.18 (dt, *J* = 13.5, 5.2 Hz, 5H), 6.82 (d, *J* = 8.1 Hz, 2H), 4.62 (t, *J* = 6.3 Hz, 1H), 2.64 (t, *J* = 7.3 Hz, 2H), 1.92 (s, 1H), 1.87 – 1.82 (m, 1H), 1.78 – 1.70 (m, 2H), 1.63 – 1.56 (m, 1H), 1.02 (s, 9H), 0.22 (s, 6H); <sup>13</sup>C NMR (101 MHz, Chloroform-*d*) δ 155.1, 142.4, 137.6, 128.5, 128.4,

127.2, 125.8, 120.1, 74.2, 38.5, 35.8, 27.7, 25.8, 18.3, -4.30; **HRMS** m/z (ESI): calcd. for  $C_{22}H_{32}O_2NaSi$   $[M+Na]^+$ : 379.2064; found: 379.2050.

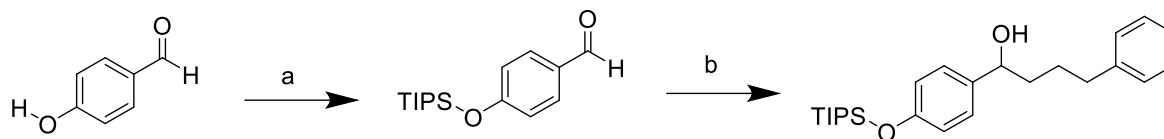

Reaction Condition:

a) Imidazole, DCM, TIPSCl, rt, 12 h, 75%. b)  $Ph(CH_2)_3MgBr$ , THF, 0 °C, 1 h, 45%.

### Figure S6. Synthesis of 1h

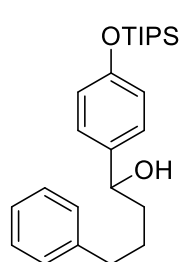

**1h**: 4-phenyl-1-(4-(triisopropylsilyloxy)phenyl)butan-1-ol. **1h** was synthesized via the route shown in **Figure S6**.

Colorless oil. **<sup>1</sup>H NMR** (400 MHz, Chloroform-*d*)  $\delta$  7.34 (t,  $J = 7.3$  Hz, 2H), 7.25 – 7.19 (m, 5H), 6.94 (dd,  $J = 8.6, 2.2$  Hz, 2H), 4.60 (t,  $J = 6.1$  Hz, 1H), 2.76 – 2.63 (m, 3H), 1.91 – 1.84 (m, 1H), 1.82 – 1.70 (m, 2H), 1.66 – 1.59 (m, 1H), 1.42 – 1.33 (m, 3H), 1.22 (dd,  $J = 7.4, 2.8$  Hz, 18H); **<sup>13</sup>C NMR** (101 MHz, Chloroform-*d*)  $\delta$  155.4, 142.4, 137.3, 128.4,

128.2, 127.1, 125.7, 119.7, 74.0, 38.5, 35.8, 27.6, 18.0, 12.7; **HRMS** m/z (ESI): calcd. for  $C_{25}H_{38}O_2NaSi$   $[M+Na]^+$ : 421.2533; found: 421.2529.

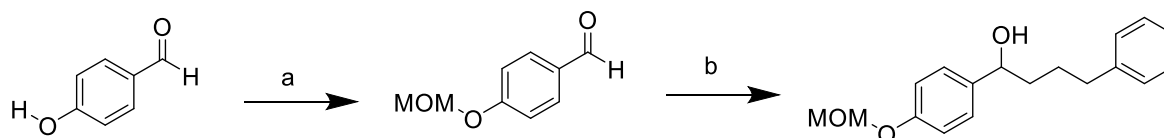

Reaction Condition:

a)  $K_2CO_3$ , acetone, MOMCl, rt, 12 h, 45%. b)  $Ph(CH_2)_3MgBr$ , THF, 0 °C, 1 h, 56%.

### Figure S7. Synthesis of 1i

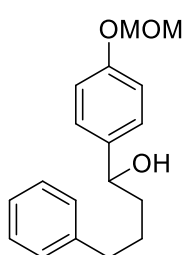

**1i**: 1-(4-(methoxymethoxy)phenyl)-4-phenylbutan-1-ol **1i** was synthesized via the route shown in **Figure S7**.

Colorless oil. **<sup>1</sup>H NMR** (400 MHz, Chloroform-*d*)  $\delta$  7.37 (t,  $J = 7.4$  Hz, 2H), 7.32 – 7.25 (m, 6H), 7.12 – 7.08 (m, 2H), 5.21 (s, 2H), 4.64 (t,  $J = 6.0$  Hz, 1H), 3.53 (s, 3H), 3.19 (s, 1H), 2.70 (d,  $J = 7.2$  Hz, 2H), 1.95 – 1.75 (m, 3H), 1.70 – 1.64 (m, 1H); **<sup>13</sup>C NMR** (101 MHz, Chloroform-*d*)  $\delta$  156.4, 142.2, 138.3, 128.3, 128.2, 127.1, 125.6, 116.0, 94.2, 73.7,

55.7, 38.4, 35.6, 27.5; **HRMS** m/z (ESI): calcd. for  $C_{18}H_{22}O_3Na$   $[M+Na]^+$ : 309.1461; found: 309.1445.

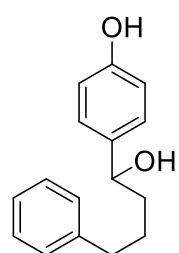

**1j**: 4-(1-hydroxy-4-phenylbutyl)phenol. **1j** was synthesized according to the general synthetic **method A**.

White solid. **<sup>1</sup>H NMR** (400 MHz, Chloroform-*d*)  $\delta$  7.28 – 7.24 (m, 2H), 7.22 – 7.13 (m, 5H), 6.82 – 6.77 (m, 2H), 4.73 (s, 1H), 4.63 (t,  $J = 6.4$  Hz, 1H), 2.62 (t,  $J = 7.3$  Hz, 2H), 1.88 – 1.79 (m, 1H), 1.77 – 1.67 (m, 3H), **<sup>13</sup>C NMR** (101 MHz, DMSO-*d*<sup>6</sup>)  $\delta$  156.1, 142.5,

136.7, 128.4, 128.4, 127.1, 125.8, 114.9, 72.2, 39.0, 35.3, 27.7; **HRMS**  $m/z$  (ESI): calcd. for  $C_{16}H_{18}NaO_2$   $[M+Na]^+$ : 265.1199; found: 265.1176.

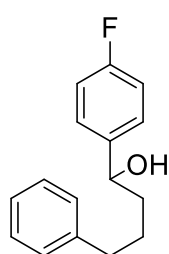

**1k**: 1-(4-fluorophenyl)-4-phenylbutan-1-ol. **1k** was synthesized according to the general synthetic **method A**.

Light yellow oil.  **$^1H$  NMR** (400 MHz, Chloroform- $d$ )  $\delta$  7.32 – 7.26 (m, 3H), 7.25 (s, 1H), 7.21 – 7.11 (m, 3H), 7.06 – 6.98 (m, 2H), 4.69 – 4.66 (m, 1H), 2.63 (t,  $J$  = 7.2 Hz, 2H), 1.88 – 1.67 (m, 4H);  **$^{13}C$  NMR** (101 MHz, Chloroform- $d$ )  $\delta$  163.4 (d,  $J$  = 243.0 Hz), 142.2, 140.5 (d,  $J$  = 3.0 Hz), 128.5, 128.4, 127.6 (d,  $J$  = 8.1 Hz), 125.9, 115.3 (d,  $J$  = 21.2 Hz),

73.9, 38.7, 35.8, 27.6; **HRMS**  $m/z$  (ESI): calcd. for  $C_{16}H_{18}FO$   $[M+H]^+$ : 245.1336; found: 245.1362.

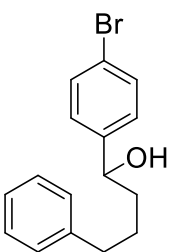

**1l**: 1-(4-bromophenyl)-4-phenylbutan-1-ol. **1l** was synthesized according to the general synthetic **method A**.

White solid.  **$^1H$  NMR** (400 MHz, Chloroform- $d$ )  $\delta$  7.49 – 7.43 (m, 2H), 7.30 – 7.24 (m, 2H), 7.27 – 7.17 (m, 3H), 7.16 – 7.12 (m, 2H), 4.67 – 4.64 (m, 1H), 2.62 (t,  $J$  = 7.1 Hz, 2H), 1.84 – 1.68 (m, 4H);  **$^{13}C$  NMR** (101 MHz, Chloroform- $d$ )  $\delta$  143.8, 142.2, 131.6, 128.5, 128.5, 127.8, 125.9, 121.4, 74.0, 38.7, 35.8, 27.5; **HRMS**  $m/z$  (ESI): calcd. for  $C_{16}H_{17}BrClO$   $[M+Cl]^-$ : 339.0157; found: 339.0171.

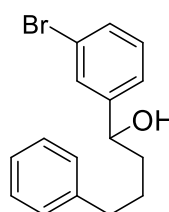

**1m**: 1-(3-bromophenyl)-4-phenylbutan-1-ol. **1m** was synthesized according to the general synthetic **method A**.

White solid.  **$^1H$  NMR** (400 MHz, Chloroform- $d$ )  $\delta$  7.49 (d,  $J$  = 1.7 Hz, 1H), 7.41 (m, 1H), 7.30 (t,  $J$  = 7.4 Hz, 2H), 7.19 (m, 5H), 4.62 ((t,  $J$  = 7.1 Hz, 1H), 2.64 (t,  $J$  = 7.1 Hz, 2H), 2.18 (s, 1H), 1.82 – 1.71 (m, 3H), 1.65 – 1.60 (m, 1H).  **$^{13}C$  NMR** (101 MHz, Chloroform- $d$ )  $\delta$  147.1, 142.1, 130.6, 130.1, 129.1, 128.5, 128.4, 125.9, 124.6, 122.7, 73.9, 38.6, 35.7, 27.5; **HRMS**  $m/z$  (ESI): calcd. for  $C_{16}H_{18}BrO$   $[M+H]^+$ : 295.0651; found: 295.0646.

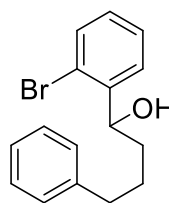

**1n**: 1-(2-bromophenyl)-4-phenylbutan-1-ol. **1n** was synthesized according to the general synthetic **method A**.

White solid.  **$^1H$  NMR** (400 MHz, Chloroform- $d$ )  $\delta$  7.52 (m, 2H), 7.36 – 7.26 (m, 3H), 7.20 (m, 3H), 7.13 (td,  $J$  = 7.7, 1.7 Hz, 1H), 5.12 – 5.09 (m, 1H), 2.73 – 2.62 (m, 2H), 1.98 (s, 1H), 1.89 – 1.72 (m, 4H);  **$^{13}C$  NMR** (101 MHz, Chloroform- $d$ )  $\delta$  143.8, 142.4, 132.8, 128.9, 128.5, 128.4, 127.8, 127.5, 125.9, 72.9, 37.3, 35.8, 27.6; **HRMS**  $m/z$  (ESI): calcd. for  $C_{16}H_{17}BrNaO$   $[M+Na]^+$ : 327.0355; found: 327.0316.

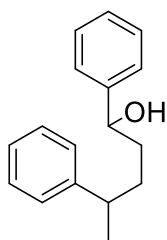

**1o**: 1,4-diphenyl-1-pentanol. **1o** was synthesized according to the general synthetic **method B**.

Light yellow oil. **<sup>1</sup>H NMR** (400 MHz, Chloroform-d)  $\delta$  7.40 – 7.24 (m, 7H), 7.20 – 7.12 (m, 3H), 4.64 – 4.59 (m, 1H), 2.72 – 2.65 (m, 1H), 1.80 – 1.61 (m, 4H), 1.23 (d,  $J = 2.4$  Hz, 3H); **<sup>13</sup>C NMR** (101 MHz, Chloroform-d)  $\delta$  147.4, 144.8, 128.6, 128.5, 127.7, 127.1, 126.7, 126.0, 74.9, 40.0, 37.2, 34.4, 22.5; **HRMS**  $m/z$  (ESI): calcd. for  $C_{17}H_{20}NaO$   $[M+Na]^+$ :

263.1406; found 263.1380.

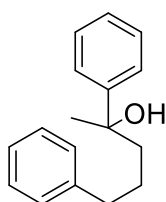

**1p**: 2,5-diphenylpentan-2-ol.<sup>[1]</sup> **1p** was synthesized according to the general synthetic **method A**.

Light yellow oil. **<sup>1</sup>H NMR** (400 MHz, Chloroform-d)  $\delta$  7.42 – 7.38 (m, 2H), 7.35 – 7.30 (m, 2H), 7.27 – 7.20 (m, 3H), 7.19 – 7.08 (m, 3H), 2.56 (t,  $J = 7.0$  Hz, 2H), 1.84 (dt,  $J = 10.4$ , 5.6 Hz, 2H), 1.62 – 1.58 (m, 2H), 1.55 (s, 3H).

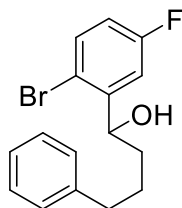

**1q**: 1-(5-bromo-2-fluorophenyl)-4-phenylbutan-1-ol. **1q** was synthesized according to the general synthetic **method A**.

Light yellow oil. **<sup>1</sup>H NMR** (400 MHz, Chloroform-d)  $\delta$  7.59 (dd,  $J = 6.4$ , 2.6 Hz, 1H), 7.34 (ddd,  $J = 8.7$ , 4.6, 2.6 Hz, 1H), 7.31 – 7.26 (m, 2H), 7.23 – 7.13 (m, 3H), 6.90 (dd,  $J = 9.8$ , 8.7 Hz, 1H), 5.01 – 4.98 (m, 1H), 2.69 – 2.60 (m, 2H), 1.89 (s, 1H), 1.83 – 1.73 (m,

3H), 1.72 – 1.61 (m, 1H); **<sup>13</sup>C NMR** (101 MHz, Chloroform-d)  $\delta$  158.8 (d,  $J = 245.8$  Hz), 142.1, 134.1, 134.0, 131.7 (d,  $J = 8.4$  Hz), 130.4 (d,  $J = 4.8$  Hz), 128.5, 128.5, 126.0, 117.2 (d,  $J = 23.9$  Hz), 67.9 (d,  $J = 2.1$  Hz), 37.7, 35.7, 27.4; **HRMS**  $m/z$  (ESI): calcd. for  $C_{16}H_{16}BrClFO$   $[M+Cl]^-$ : 357.0063; found: 357.0085.

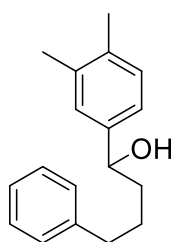

**1r**: 1-(3,4-dimethylphenyl)-4-phenylbutan-1-ol. **1r** was synthesized according to the general synthetic **method A**.

White solid. **<sup>1</sup>H NMR** (400 MHz, Chloroform-d)  $\delta$  7.31 – 7.25 (m, 2H), 7.22 – 7.15 (m, 3H), 7.15 – 7.10 (m, 2H), 7.10 – 7.05 (m, 1H), 4.64 (t,  $J = 7.3$  Hz, 1H), 2.65 (t,  $J = 7.3$  Hz, 2H), 2.28 (s, 3H), 2.27 (s, 3H), 1.89 – 1.64 (m, 4H); **<sup>13</sup>C NMR** (101 MHz, Chloroform-

d)  $\delta$  142.4, 142.3, 136.7, 135.9, 129.7, 128.5, 128.3, 127.2, 125.7, 123.4, 74.5, 38.5, 35.8, 27.7, 19.9, 19.5; **HRMS**  $m/z$  (ESI): calcd. for  $C_{18}H_{22}NaO$   $[M+Na]^+$ : 277.1563; found: 277.1548.

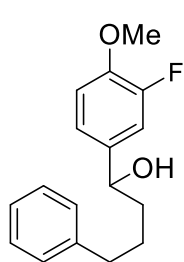

**1s:** 1-(3-fluoro-4-methoxyphenyl)-4-phenylbutan-1-ol. **1s** was synthesized according to the general synthetic **method A**.

White solid. **<sup>1</sup>H NMR** (400 MHz, Chloroform-*d*)  $\delta$  7.30 – 7.27 (m, 1H), 7.26 – 7.25 (m, 1H), 7.21 – 7.17 (m, 1H), 7.17 – 7.14 (m, 2H), 7.07 (dd, *J* = 12.2, 2.1 Hz, 1H), 7.01 (m, 1H), 6.91 (t, *J* = 8.4 Hz, 1H), 4.62 – 4.59 (m, 1H), 3.88 (s, 3H), 2.63 (t, *J* = 7.3 Hz, 2H), 1.89 (s, 1H), 1.84 – 1.68 (m, 3H), 1.62 – 1.56 (m, 1H); **<sup>13</sup>C NMR** (101 MHz, Chloroform-*d*)  $\delta$  152.5 (d, *J* = 246.4 Hz), 147.0 (d, *J* = 10.7 Hz), 142.3, 138.0 (d, *J* = 5.1 Hz), 128.5, 128.4, 125.9, 121.7 (d, *J* = 3.5 Hz), 113.8 (d, *J* = 18.6 Hz), 113.4 (d, *J* = 2.6 Hz), 73.8 (d, *J* = 1.4 Hz), 56.5, 38.6, 35.8, 27.6; **HRMS** *m/z* (ESI): calcd. for C<sub>17</sub>H<sub>19</sub>FNaO<sub>2</sub> [M+Na]<sup>+</sup>: 297.1261; found: 297.1244.

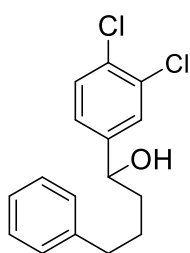

**1t:** 1-(3,4-dichlorophenyl)-4-phenylbutan-1-ol. **1t** was synthesized according to the general synthetic **method A**.

White solid. **<sup>1</sup>H NMR** (400 MHz, Chloroform-*d*)  $\delta$  7.43 – 7.38 (m, 2H), 7.30 – 7.25 (m, 2H), 7.21 – 7.12 (m, 4H), 4.66 – 4.63 (m, 1H), 2.63 (t, *J* = 7.1 Hz, 2H), 1.81 – 1.68 (m, 4H); **<sup>13</sup>C NMR** (101 MHz, Chloroform-*d*)  $\delta$  145.0, 142.0, 132.6, 131.3, 130.5, 128.5, 128.5, 128.0, 126.0, 125.3, 73.3, 38.6, 35.7, 27.4; **HRMS** *m/z* (ESI): calcd. for C<sub>16</sub>H<sub>18</sub>Cl<sub>2</sub>O [M+H]<sup>+</sup>: 295.0651; found 295.0632.

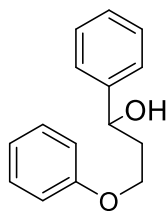

**1u:** 3-phenoxy-1-phenylpropan-1-ol.<sup>[3]</sup>

White solid. **<sup>1</sup>H NMR** (400 MHz, Chloroform-*d*)  $\delta$  7.43 – 7.33 (m, 4H), 7.33 – 7.26 (m, 3H), 6.96 (tt, *J* = 7.4, 1.1 Hz, 1H), 6.94 – 6.89 (m, 2H), 5.03 (ddd, *J* = 7.7, 4.4, 2.5 Hz, 1H), 4.18 (ddd, *J* = 9.4, 7.0, 4.9 Hz, 1H), 4.06 (ddd, *J* = 9.4, 6.6, 5.0 Hz, 1H), 2.52 (d, *J* = 3.2 Hz, 1H), 2.31 – 2.16 (m, 2H).

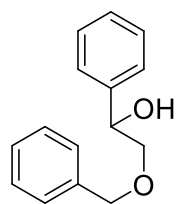

**1v:** 2-(benzyloxy)-1-phenylethan-1-ol.<sup>[4]</sup>

Colorless oil. **<sup>1</sup>H NMR** (400 MHz, Chloroform-*d*)  $\delta$  7.41 – 7.26 (m, 10H), 4.94 (dd, *J* = 9.1, 3.1 Hz, 1H), 4.64 – 4.58 (m, 2H), 3.65 (dd, *J* = 9.7, 3.2 Hz, 1H), 3.51 (t, *J* = 9.4 Hz, 1H), 2.84 (s, 1H); **<sup>13</sup>C NMR** (101 MHz, Chloroform-*d*)  $\delta$  140.3, 137.9, 128.6, 128.5, 128.0, 128.0, 127.9, 126.3, 75.9, 73.5, 73.0.

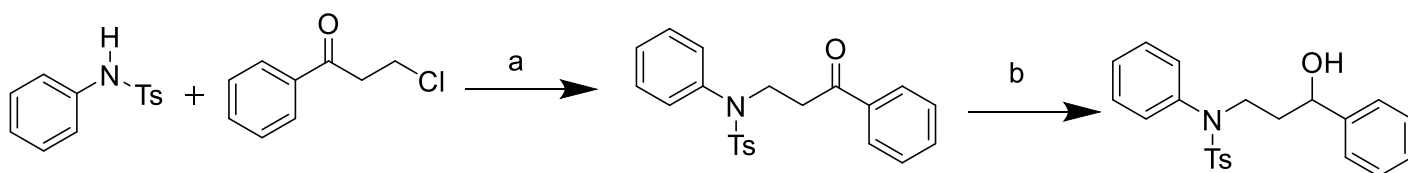

Reaction Condition:

a) Et<sub>3</sub>N, THF, reflux, 12 h, 72%. b) NaBH<sub>4</sub>, THF, 0 °C, 1 h, 57%.

**Figure S8. Synthesis of 1w**



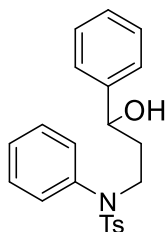

**1w:** *N*-(3-hydroxy-3-phenylpropyl)-4-methyl-*N*-phenylbenzenesulfonamide. **1w** was synthesized via the route shown in **Figure S8**.

White solid.  $^1\text{H NMR}$  (400 MHz, Chloroform-*d*)  $\delta$  7.51 – 7.48 (m, 2H), 7.38 – 7.29 (m, 7H), 7.27 (d,  $J = 7.9$  Hz, 3H), 7.11 – 7.10 (m, 2H), 4.92 (dd,  $J = 9.1, 4.2$  Hz, 1H), 3.95 (dt,  $J = 14.3, 7.5$  Hz, 1H), 3.57 (dt,  $J = 12.8, 5.7$  Hz, 1H), 3.15 (s, 1H), 2.44 (s, 3H), 1.87 – 1.79 (m, 2H);  $^{13}\text{C NMR}$  (101 MHz, Chloroform-*d*)  $\delta$  144.2, 143.6, 139.1, 135.0, 129.6, 129.2, 128.8, 128.4, 128.1, 127.7, 127.4, 125.8, 70.7, 47.7, 37.6, 21.6; **HRMS**  $m/z$  (ESI): calcd. for  $\text{C}_{22}\text{H}_{24}\text{NO}_3\text{S}$   $[\text{M}+\text{H}]^+$ : 382.1471; Found: 382.1473.

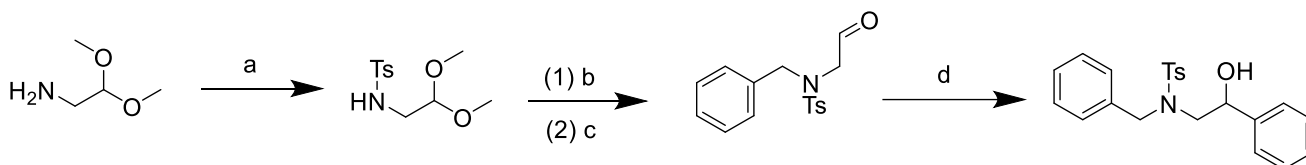

Reaction Condition:

a)  $\text{Et}_3\text{N}$ , DCM, 0 °C, then 4-methylbenzenesulfonyl chloride, 0 °C to rt, 12 h, 72%. b)  $\text{PhCH}_2\text{Br}$ , NaH, THF, 1 h, 89%. c) HCl, acetone, reflux, 3 h, 78%. d)  $\text{PhMgBr}$ , THF, 0 °C, 1 h, 84%.

#### Figure S9. Synthesis of 1x

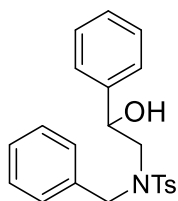

**1x:** *N*-benzyl-*N*-(2-hydroxy-2-phenylethyl)-4-methylbenzenesulfonamide. **1x** was synthesized via the route shown in **Figure S9**.

Yellow solid.  $^1\text{H NMR}$  (400 MHz, Chloroform-*d*)  $\delta$  7.75 (d,  $J = 8.0$  Hz, 2H), 7.40 – 7.19 (m, 10H), 7.11 (d,  $J = 6.7$  Hz, 2H), 4.62 (d,  $J = 14.4$  Hz, 1H), 4.52 (dd,  $J = 9.4, 2.7$  Hz, 1H), 4.14 (d,  $J = 14.4$  Hz, 1H), 3.36 (dd,  $J = 15.1, 9.4$  Hz, 1H), 3.07 (dd,  $J = 15.1, 2.8$  Hz, 1H), 2.89 (s, 1H), 2.44 (s, 3H);  $^{13}\text{C NMR}$  (101 MHz, Chloroform-*d*)  $\delta$  143.9, 141.4, 136.1, 136.0, 130.0, 129.0, 128.9, 128.5, 128.4, 127.9, 127.5, 125.9, 72.6, 56.8, 54.2, 21.7; **HRMS**  $m/z$  (ESI): calcd. for  $\text{C}_{22}\text{H}_{23}\text{ClNO}_3\text{S}$   $[\text{M}+\text{Cl}]^-$ : 416.1093; found: 416.1076.

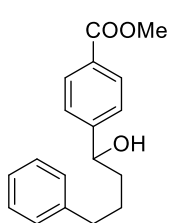

**1y:** methyl-4-(1-hydroxy-4-phenylbutyl)benzoate.<sup>[2]</sup> **1y** was synthesized according to the general synthetic **method A**.

White solid.  $^1\text{H NMR}$  (400 MHz, Chloroform-*d*)  $\delta$  8.03 – 8.02 (m, 2H), 7.41 (d,  $J = 8.3$  Hz, 2H), 7.29 (q,  $J = 1.3$  Hz, 2H), 7.21 – 7.20 (m, 1H), 7.19 – 7.16 (m, 2H), 4.78 – 4.76 (m, 1H), 3.93 (s, 3H), 2.66 (t,  $J = 7.3$  Hz, 2H), 2.00 (s, 1H), 1.87 – 1.73 (m, 3H), 1.66 – 1.62 (m, 1H).

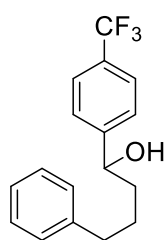

**1z:** 4-phenyl-1-(4-(trifluoromethyl)phenyl)butan-1-ol.<sup>[2]</sup> **1z** was synthesized according to the general synthetic **method A**.

Light yellow solid. **<sup>1</sup>H NMR** (400 MHz, Chloroform-d)  $\delta$  7.59 (d,  $J$  = 8.1 Hz, 2H), 7.44 (d,  $J$  = 8.4 Hz, 2H), 7.30 – 7.24 (m, 2 H), 7.21 – 7.13 (m, 3 H), 4.77 (t,  $J$  = 6.8 Hz, 1H), 2.64 (t,  $J$  = 6.8 Hz, 2H), 1.84 – 1.65 (m, 4H).

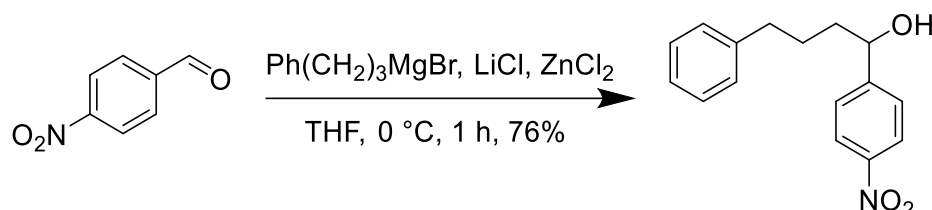

**Figure S10. Synthesis of 1aa**

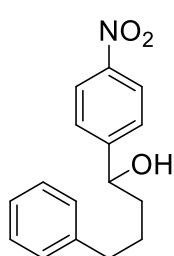

**1aa:** 1-(4-nitrophenyl)-4-phenylbutan-1-ol. **1aa** was synthesized via the route shown in **Figure S10**.

Yellow oil. **<sup>1</sup>H NMR** (400 MHz, Chloroform-d)  $\delta$  8.21 – 8.18 (m, 2H), 7.50 – 7.47 (m, 2H), 7.29 – 7.26 (m, 1H), 7.25 (s, 1H), 7.21 – 7.14 (m, 1H), 7.16 – 7.12 (m, 2H), 4.83 (t,  $J$  = 6.8 Hz, 1H), 2.64 (t,  $J$  = 7.0 Hz, 2H), 1.83 – 1.75 (m, 3H), 1.68 – 1.63 (m, 1H). **<sup>13</sup>C NMR** (101 MHz, Chloroform-d)  $\delta$  152.1, 141.9, 128.6, 128.5, 126.7, 126.1, 123.9, 73.6, 38.9, 35.7, 27.3; **HRMS**  $m/z$  (ESI): calcd. for  $C_{16}H_{17}NNaO_3$   $[M+Na]^+$ : 294.1101; found: 294.1125.

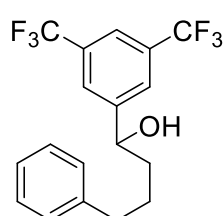

**1bb:** 1-(3,5-bis(trifluoromethyl)phenyl)-4-phenylbutan-1-ol. **1bb** was synthesized according to the general synthetic **method A**.

Yellow solid. **<sup>1</sup>H NMR** (400 MHz, Chloroform-d)  $\delta$  7.79 (s, 3H), 7.29 (m, 2H), 7.24 – 7.13 (m, 3H), 4.84 – 4.81 (m, 1H), 2.67 (t,  $J$  = 7.0 Hz, 2H), 2.03 (s, 1H), 1.85 – 1.75 (m, 3H), 1.73 – 1.66 (m, 1H); **<sup>13</sup>C NMR** (101 MHz, Chloroform-d)  $\delta$  147.5, 141.8, 131.8 (q,  $J$  = 33.1 Hz), 128.6, 128.5, 126.2, 126.1, 123.49 (q,  $J$  = 270.9 Hz), 121.5 (q,  $J$  = 3.8 Hz), 73.4, 38.9, 35.6, 27.3; **HRMS**  $m/z$  (ESI): calcd. for  $C_{18}H_{16}ClF_6O$   $[M+Cl]^-$ : 397.0799; found: 397.0811.

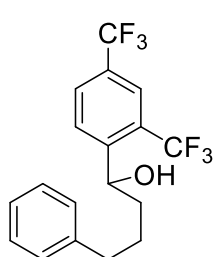

**1cc:** 1-(2,4-bis(trifluoromethyl)phenyl)-4-phenylbutan-1-ol. The synthetic of **1cc** was according to the general synthetic **method A**.

Yellow solid. **<sup>1</sup>H NMR** (400 MHz, Chloroform-d)  $\delta$  7.95 – 7.83 (m, 3H), 7.32 – 7.29 (m, 2H), 7.23 – 7.19 (m, 3H), 5.21 – 5.17 (m, 1H), 2.71 – 2.66 (m, 2H), 1.96 – 1.88 (m, 1H), 1.80 – 1.72 (m, 3H); **<sup>13</sup>C NMR** (101 MHz, Chloroform-d)  $\delta$  142.0, 128.8, 128.5, 128.5, 126.0, 69.3, 39.0, 35.7, 27.9; **HRMS**  $m/z$  (ESI): calcd. for  $C_{18}H_{16}ClF_6O$   $[M+Cl]^-$ :

397.0799; found: 397.0801.

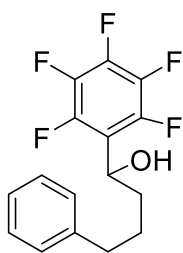

**1dd:** 1-(perfluorophenyl)-4-phenylbutan-1-ol. **1dd** was synthesized according to the general synthetic **method A**.

Yellow solid. **<sup>1</sup>H NMR** (400 MHz, Chloroform-d)  $\delta$  7.31 – 7.26 (m, 2H), 7.22 – 7.14 (m, 3H), 5.07 – 5.04 (m, 1H), 2.67 (t,  $J$  = 7.4 Hz, 2H), 2.07 – 2.02 (m, 1H), 1.88 – 1.77 (m, 2H), 1.63 – 1.57 (m, 1H); **<sup>13</sup>C NMR** (101 MHz, Chloroform-d)  $\delta$  141.7, 128.6, 128.5, 126.2, 66.5, 36.6, 35.5, 27.7; **HRMS**  $m/z$  (ESI): calcd. for C<sub>16</sub>H<sub>13</sub>ClF<sub>5</sub>O [M+Cl]<sup>+</sup>:

351.0581; found: 351.0615.

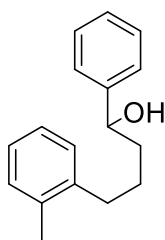

**1ee:** 1-phenyl-4-(o-tolyl)butan-1-ol. **1ee** was synthesized according to the general synthetic **method B**.

Yellow oil. **<sup>1</sup>H NMR** (400 MHz, Chloroform-d)  $\delta$  7.35 (d,  $J$  = 4.1 Hz, 4H), 7.31 – 7.26 (m, 1H), 7.14 – 7.07 (m, 4H), 4.70 (t,  $J$  = 6.6 Hz, 1H), 2.62 (t,  $J$  = 7.7 Hz, 2H), 2.27 (s, 3H), 1.96 – 1.70 (m, 4H); **<sup>13</sup>C NMR** (101 MHz, Chloroform-d)  $\delta$  144.8, 140.6, 136.0, 130.3,

128.9, 128.6, 127.7, 126.0, 126.0, 126.0, 74.7, 39.0, 33.2, 26.5, 19.4; **HRMS**  $m/z$  (ESI): calcd. for C<sub>17</sub>H<sub>20</sub>NaO [M+Na]<sup>+</sup>: 263.1406; found: 263.1397.

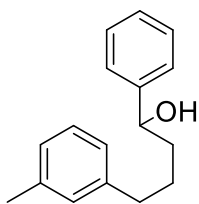

**1ff:** 1-phenyl-4-(m-tolyl)butan-1-ol. **1ff** was synthesized according to the general synthetic **method B**.

Yellow oil. **<sup>1</sup>H NMR** (400 MHz, Chloroform-d)  $\delta$  7.37 – 7.32 (m,  $J$  = 7.35 Hz, 4H), 7.31 – 7.26 (m, 1H), 7.17 (t,  $J$  = 7.4 Hz, 1H), 7.03 – 6.96 (m, 3H), 4.70 – 4.67 (m, 1H), 2.63 – 2.59 (m, 2H), 2.34 (s, 3H), 1.97 (s, 1H), 1.97 – 1.72 (m, 3H), 1.68 – 1.59 (m, 1H); **<sup>13</sup>C**

**NMR** (101 MHz, Chloroform-d)  $\delta$  144.7, 142.2, 137.8, 129.3, 128.5, 128.2, 127.6, 126.5, 126.0, 125.4, 74.4, 38.6, 35.7, 27.6, 21.4; **HRMS**  $m/z$  (ESI): calcd. for C<sub>17</sub>H<sub>20</sub>NaO [M+Na]<sup>+</sup>: 263.1406; found: 263.1408.

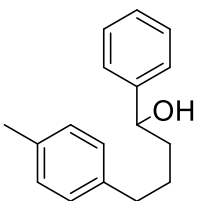

**1gg:** 1-phenyl-4-(p-tolyl)butan-1-ol. **1gg** was synthesized according to the general synthetic **method B**.

Light yellow oil. **<sup>1</sup>H NMR** (400 MHz, Chloroform-d)  $\delta$  7.36 – 7.31 (m, 4H), 7.30 – 7.25 (m, 1H), 7.09 – 7.03 (m, 4H), 4.70 – 4.67 (m, 1H), 2.59 (t,  $J$  = 7.4 Hz, 2H), 2.31 (s, 3H), 1.89 – 1.68 (m, 4H); **<sup>13</sup>C NMR** (101 MHz, Chloroform-d)  $\delta$  144.8, 139.3, 135.2, 129.1,

128.5, 128.4, 127.6, 126.0, 74.6, 38.7, 35.4, 27.8, 21.1; **HRMS**  $m/z$  (ESI): calcd. for C<sub>17</sub>H<sub>20</sub>NaO [M+Na]<sup>+</sup>: 263.1406; found: 263.1409.

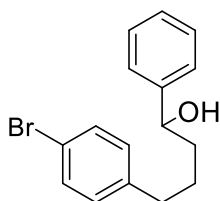

**1hh:** 4-(4-bromophenyl)-1-phenylbutan-1-ol. **1hh** was synthesized according to the general synthetic **method B**.

Light yellow oil. **<sup>1</sup>H NMR** (400 MHz, Chloroform-d)  $\delta$  7.39 – 7.34 (m, 3H), 7.34 – 7.26 (m, 4H), 7.04 – 7.00 (m, 2H), 4.69 – 4.66 (m, 1H), 2.58 (t,  $J$  = 7.2 Hz, 2H), 1.86 – 1.78 (m, 2H), 1.74 – 1.70 (m, 2H); **<sup>13</sup>C NMR** (101 MHz, Chloroform-d)  $\delta$  144.6, 141.1,

131.3, 130.2, 128.5, 127.7, 125.8, 119.5, 74.5, 38.4, 35.1, 27.5; **HRMS**  $m/z$  (ESI): calcd. for  $C_{16}H_{17}BrNaO$   $[M+Na]^+$ : 327.0355; found: 327.0357.

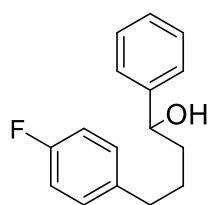

**1ii**: 4-(4-fluorophenyl)-1-phenylbutan-1-ol. **1ii** was synthesized according to the general synthetic **method B**.

Light yellow oil.  **$^1H$  NMR** (400 MHz, Chloroform- $d$ )  $\delta$  7.39 – 7.26 (m, 5H), 7.14 – 7.06 (m, 2H), 6.99 – 6.91 (m, 2H), 4.68 – 4.65 (m, 1H), 2.60 (t,  $J$  = 7.2 Hz, 2H), 2.04 (s, 1H), 1.88 – 1.69 (m, 3H), 1.65 – 1.53 (m, 1H);  **$^{13}C$  NMR** (101 MHz, Chloroform- $d$ )  $\delta$  161.2 (d,  $J$  = 244.4 Hz), 144.7, 137.8, 137.8, 129.7 (d,  $J$  = 7.1 Hz), 128.5, 127.6, 126.6, 125.9, 115.0 (d,  $J$  = 21.2 Hz), 74.5, 38.4, 34.9, 27.7. **HRMS**  $m/z$  (ESI): calcd. for  $C_{16}H_{17}FNaO$   $[M+Na]^+$ : 267.1156; found: 267.1155.

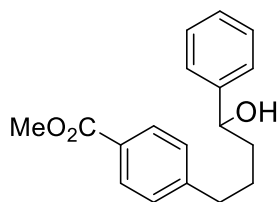

**1jj**: methyl 4-(4-hydroxy-4-phenylbutyl)benzoate. **1jj** was synthesized according to the general synthetic **method B**.

White solid.  **$^1H$  NMR** (400 MHz, Chloroform- $d$ )  $\delta$  7.96 – 7.92 (m, 2H), 7.38 – 7.26 (m, 5H), 7.24 – 7.21 (m, 2H), 4.67 (t,  $J$  = 7.2 Hz, 1H), 3.89 (s, 3H), 2.68 (t,  $J$  = 7.3 Hz, 2H), 2.54 (s, 1H), 1.86 – 1.62 (m, 4H);  **$^{13}C$  NMR** (101 MHz, Chloroform- $d$ )  $\delta$  167.3, 147.9, 144.8, 129.7, 128.7, 128.5, 128.0, 127.6, 125.9, 74.3, 52.0, 38.52, 35.8, 27.2; **HRMS**  $m/z$  (ESI): calcd. for  $C_{18}H_{20}NaO_3$   $[M+Na]^+$ : 307.1305; found: 307.1307.

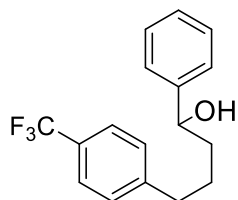

**1kk**: 1-phenyl-4-(4-(trifluoromethyl)phenyl)butan-1-ol. **1kk** was synthesized according to the general synthetic **method B**.

White solid.  **$^1H$  NMR** (400 MHz, Chloroform- $d$ )  $\delta$  7.54 (d,  $J$  = 8.0 Hz, 2H), 7.40 – 7.30 (m, 5H), 7.30 – 7.25 (m, 2H), 4.71 (t,  $J$  = 5.9 Hz, 1H), 2.71 (t,  $J$  = 7.2 Hz, 2H), 1.94 (s, 1H), 1.91 – 1.74 (m, 3H), 1.70 – 1.62 (m, 1H);  **$^{13}C$  NMR** (101 MHz, Chloroform- $d$ )  $\delta$  146.5 (q,  $J$  = 2.0 Hz), 144.7, 128.8, 128.7, 128.3 (q,  $J$  = 32.3 Hz), 127.8, 126.0, 125.4 (q,  $J$  = 4.0 Hz), 124.5 (q,  $J$  = 272.7 Hz), 74.6, 38.5, 35.7, 27.4;  **$^{19}F$  NMR** (376 MHz,  $CDCl_3$ )  $\delta$  -62.2 (s); **HRMS**  $m/z$  (ESI): calcd. for  $C_{17}H_{17}F_3NaO$   $[M+Na]^+$ : 317.1124; found: 317.1126.

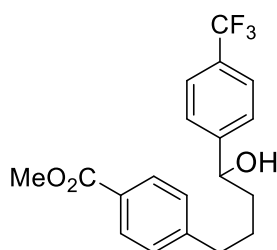

**1ll**: methyl 4-(4-hydroxy-4-(4-(trifluoromethyl)phenyl)butyl)benzoate. **1ll** was synthesized according to the general synthetic **method B**.

White solid.  **$^1H$  NMR** (400 MHz, Chloroform- $d$ )  $\delta$  7.95 – 7.90 (m, 2H), 7.58 (d,  $J$  = 8.0 Hz, 2H), 7.42 (d,  $J$  = 8.1 Hz, 2H), 7.23 – 7.16 (m, 2H), 4.75 (t,  $J$  = 5.9 Hz, 1H), 3.88 (s, 3H), 2.68 (t,  $J$  = 7.1 Hz, 2H), 2.14 (s, 1H), 1.85 – 1.70 (m, 3H), 1.67 – 1.60 (m, 1H);  **$^{13}C$  NMR** (101 MHz, Chloroform- $d$ )  $\delta$  167.30, 148.7 (q,  $J$  = 1.0 Hz), 147.6, 129.9, 129.7, 129.9 (q,  $J$  = 32.3 Hz), 128.6, 126.8 (q,  $J$  = 248.5 Hz), 126.2, 125.6 (q,  $J$

= 4.0 Hz), 73.8, 52.1, 38.7, 35.8, 27.1;  $^{19}\text{F}$  NMR (376 MHz,  $\text{CDCl}_3$ )  $\delta$  -62.4 (s); **HRMS**  $m/z$  (ESI): calcd. for  $\text{C}_{19}\text{H}_{20}\text{F}_3\text{O}_3$   $[\text{M}+\text{Na}]^+$ : 353.1359; found: 353.1361.

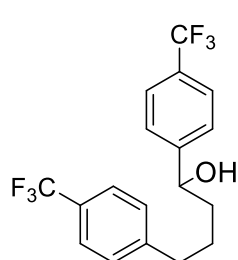

**1mm**: 1,4-bis(4-(trifluoromethyl)phenyl)butan-1-ol. **1mm** was synthesized according to the general synthetic **method B**.

White solid.  $^1\text{H}$  NMR (400 MHz, Chloroform- $d$ )  $\delta$  7.62 (d,  $J$  = 8.0 Hz, 2H), 7.52 (d,  $J$  = 8.0 Hz, 2H), 7.43 (d,  $J$  = 8.0 Hz, 2H), 7.27 (d,  $J$  = 8.1 Hz, 2H), 4.80 – 4.77 (m, 1H), 2.71 (t,  $J$  = 7.1 Hz, 2H), 2.05 – 2.04 (m, 1H), 1.86 – 1.72 (m,  $J$  = 18.1, 10.9, 9.1, 4.9 Hz, 3H), 1.71 – 1.64 (m, 1H);  $^{13}\text{C}$  NMR (101 MHz, Chloroform- $d$ )  $\delta$  148.6, 146.2, 129.9 (q,  $J$  = 32.3 Hz), 128.8, 128.4 (q,  $J$  = 29.3 Hz), 126.2, 125.4 (q,  $J$  = 3.0 Hz), 125.3 (q,  $J$  = 4.0 Hz), 73.9, 38.6, 35.6, 27.2;  $^{19}\text{F}$  NMR (376 MHz,  $\text{CDCl}_3$ )  $\delta$  -62.3 (s), -62.4 (s); **HRMS**  $m/z$  (ESI): calcd. for  $\text{C}_{18}\text{H}_{16}\text{F}_6\text{NaO}$   $[\text{M}+\text{Na}]^+$ : 385.0998; found: 385.0996.

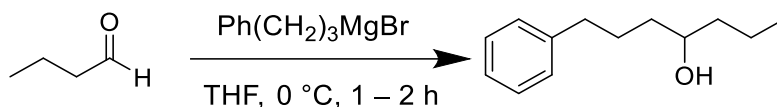

**Figure S11. Synthesis of 1oo**

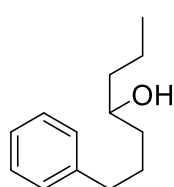

**1oo**: 1-phenylheptan-4-ol. **1oo** was synthesized via the route shown in **Figure S11**.

White solid.  $^1\text{H}$  NMR (400 MHz, Chloroform- $d$ )  $\delta$  7.30 – 7.26 (m, 2H), 7.22 – 7.14 (m, 3H), 3.63 (tt,  $J$  = 7.4, 4.5 Hz, 1H), 2.71 – 2.57 (m, 2H), 1.85 – 1.61 (m, 2H), 1.51 – 1.41 (m, 6H), 0.95 – 0.89 (m, 3H);  $^{13}\text{C}$  NMR (101 MHz, Chloroform- $d$ )  $\delta$  142.5, 128.5, 128.4, 125.8, 71.6, 39.8, 37.1, 36.0, 27.6, 18.9, 14.2; **HRMS**  $m/z$  (ESI): calcd. for  $\text{C}_{13}\text{H}_{19}\text{O}$   $[\text{M}-\text{H}]^-$ : 191.1441; found: 191.1426.

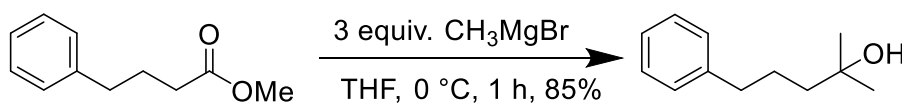

**Figure S12. Synthesis of 1pp**

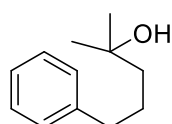

**1pp**: 1-phenylheptan-4-ol.<sup>[5]</sup> **1pp** was synthesized via the route shown in **Figure S12**.

White solid.  $^1\text{H}$  NMR (400 MHz, Chloroform- $d$ )  $\delta$  7.31 – 7.26 (m, 2H), 7.20 – 7.16 (m, 3H), 2.63 (t,  $J$  = 7.5 Hz, 2H), 1.74 – 1.68 (m, 2H), 1.67 – 1.49 (m, 2H), 1.21 (s, 6H).

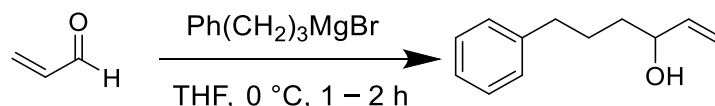

**Figure S13. Synthesis of 1qq**

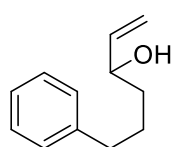

**1qq:** 1-phenylheptan-4-ol.<sup>[6]</sup> **1qq** was synthesized via the route shown in **Figure S13**.

Colorless oil. **<sup>1</sup>H NMR** (400 MHz, Chloroform-d)  $\delta$  7.45 (d,  $J$  = 8.2 Hz, 2H), 7.34 (d,  $J$  = 2.1 Hz, 3H), 5.99 (dddd,  $J$  = 16.8, 10.5, 6.1, 2.1 Hz, 1H), 5.36 (dq,  $J$  = 17.3, 1.7 Hz, 1H), 5.24 (dt,  $J$  = 10.3, 1.6 Hz, 1H), 4.22 (q,  $J$  = 6.4 Hz, 1H), 3.36 (s, 1H), 2.79 (td,  $J$  = 7.5, 2.1 Hz, 2H), 1.96 – 1.69 (m, 4H).

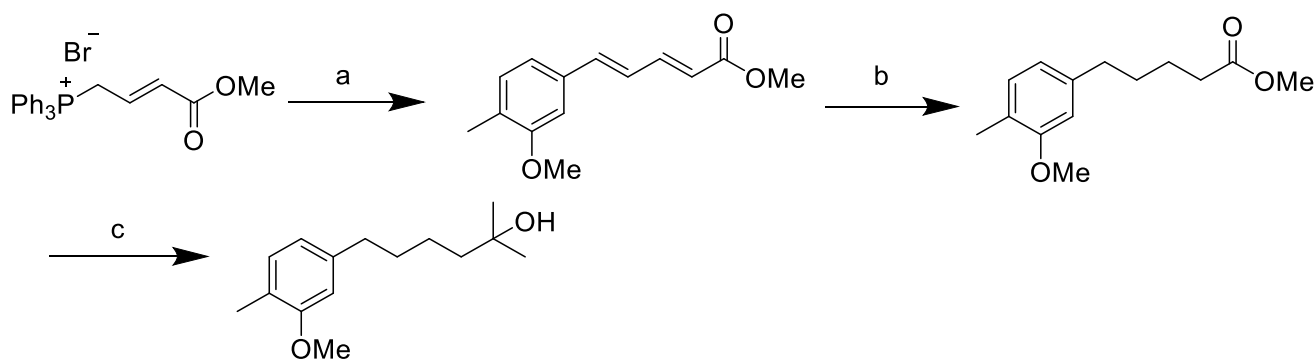

Reaction Condition:

a) NaH, THF, then 3-methoxy-4-methylbenzaldehyde, THF, 12 h, 72%. b) Pd/C, H<sub>2</sub>, MeOH, rt, 12 h, 94%. c) CH<sub>3</sub>MgBr, THF, 0 °C to rt, 1 h, 84%.

**Figure S14. Synthesis of 1rr**

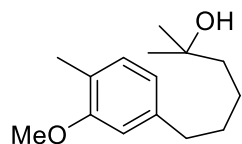

**1rr:** 6-(3-methoxy-4-methylphenyl)-2-methylhexan-2-ol. **1rr** was synthesized via the route shown in **Figure S14**.

Colorless oil. **<sup>1</sup>H NMR** (400 MHz, Chloroform-d)  $\delta$  7.04 (dd,  $J$  = 7.4, 0.9 Hz, 1H), 6.69 (dd,  $J$  = 7.4, 1.6 Hz, 1H), 6.66 (d,  $J$  = 1.5, 0.9 Hz, 1H), 3.83 (s, 3H), 2.61 (t,  $J$  = 7.8 Hz, 2H), 2.19 (s, 3H), 1.68 – 1.59 (m, 2H), 1.55 – 1.49 (m, 2H), 1.46 – 1.39 (m, 2H), 1.22 (s, 6H); **<sup>13</sup>C NMR** (101 MHz, Chloroform-d)  $\delta$  157.7, 141.6, 130.5, 123.9, 120.2, 110.4, 71.2, 55.4, 43.9, 36.1, 32.4, 29.4, 24.2, 16.0; **HRMS**  $m/z$  (ESI): calcd. for C<sub>15</sub>H<sub>24</sub>ClO<sub>2</sub> [M+Cl]<sup>-</sup>: 271.1470; found 271.1488.

## 5 Products of intramolecular dehydrative Friedel-Crafts reaction and spectral data

### 5.1 Preparation of (5% w/w) $\text{Re}_2\text{O}_7 \cdot \text{SiO}_2$ or (10% w/w) $\text{Re}_2\text{O}_7 \cdot \text{SiO}_2$ [7]

A slurry of  $\text{SiO}_2$  (3.27 g) and of  $\text{Re}_2\text{O}_7$  (0.172 g) in  $\text{Et}_2\text{O}$  (10 mL) was stirred in a round bottom flask at room temperature for 3 h, then the solvent was removed under reduced pressure. The resulting powder was dried under vacuum overnight. The catalyst was transferred to a vial, wrapped in aluminum foil, and stored in a desiccator.

A slurry of  $\text{SiO}_2$  (2.98 g) and of  $\text{Re}_2\text{O}_7$  (0.327 g) in  $\text{Et}_2\text{O}$  (10 mL) was stirred in a round bottom flask at room temperature for 3 h, then the solvent was removed under reduced pressure. The resulting powder was dried under vacuum overnight. The catalyst was transferred to a vial, wrapped in aluminum foil, and stored in a desiccator.

### 5.2 General procedure C for the $\text{Re}_2\text{O}_7 \cdot \text{SiO}_2$ mediated Friedel-Crafts alkylation.

To a solution of the substrate (0.1 mmol) in HFIP (0.2 mL) was added  $\text{Re}_2\text{O}_7 \cdot \text{SiO}_2$  (5% w/w, 0.001 equiv). The reaction mixture was sealed in the reaction tube and stirred at room temperature for 1 hour. Then the reaction was quenched by adding 20  $\mu\text{l}$   $\text{Et}_3\text{N}$ , and the solvent was removed under vacuum. The crude mixture was then purified by flash column chromatography to afford the target product.

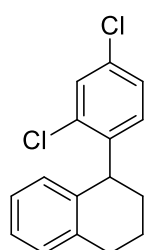

**2a:** 1-(2,4-dichlorophenyl)-1,2,3,4-tetrahydronaphthalene.

**2a** was synthesized according to the general synthetic **method C** with **1a** (29.5 mg, 0.1 mmol),  $\text{Re}_2\text{O}_7 \cdot \text{SiO}_2$  (0.96 mg, 0.0001 mmol), and HFIP (0.2 mL). The reaction was stirred at room temperature for 1 hour, then quenched with 20  $\mu\text{l}$   $\text{Et}_3\text{N}$ , concentrated under vacuum and purified through flash chromatography (100% petroleum ether) to give the desired product as a colorless oil (26.6 mg, 96% yield).  **$^1\text{H NMR}$**  (400 MHz, Chloroform- $d$ )  $\delta$  7.40 (d,  $J$  = 2.2 Hz, 1H), 7.17 – 7.11 (m, 2H), 7.06 (m, 2H), 6.78 (dd,  $J$  = 2.3, 8.6 Hz, 1H), 6.74 (d,  $J$  = 8.4 Hz, 1H), 4.60 (t,  $J$  = 6.2 Hz, 1H), 2.96 – 2.78 (m, 2H), 2.19 – 2.08 (m, 1H), 1.88 – 1.74 (m, 3H);  **$^{13}\text{C NMR}$**  (101 MHz, Chloroform- $d$ )  $\delta$  143.5, 138.1, 138.1, 134.5, 132.3, 131.9, 130.1, 129.3, 129.2, 127.0, 126.4, 126.1, 41.4, 30.6, 29.8, 20.6; **GC-MS**  $m/z$  (EI): calcd. for  $\text{C}_{16}\text{H}_{14}\text{Cl}_2$   $[\text{M}]^+$ : 276.05, found 276.10.

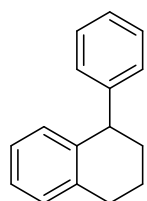

**2b:** 1-phenyl-1,2,3,4-tetrahydronaphthalene.<sup>[1]</sup>

**2b** was synthesized according to the general synthetic **method C** with **1b** (22.6 mg, 0.1 mmol),  $\text{Re}_2\text{O}_7 \cdot \text{SiO}_2$  (0.96 mg, 0.0001 mmol), and HFIP (0.2 mL). The reaction was stirred at room temperature for 1 hour, then quenched with 20  $\mu\text{l}$   $\text{Et}_3\text{N}$ , concentrated under vacuum and purified through flash chromatography (100% petroleum ether) to give the desired product as a colorless oil (20.0 mg, 96% yield).  **$^1\text{H NMR}$**  (400 MHz, Chloroform- $d$ )  $\delta$  7.30 – 7.26 (m, 2H), 7.23 – 7.17 (m, 1H), 7.16 – 7.07 (m, 4H), 7.06 – 7.00 (m, 1H), 6.84 (d,  $J$  = 7.7 Hz, 1H), 4.12 (t,  $J$  = 6.8



Hz, 1H), 2.87 (m, 2H), 2.16 (m, 1H), 1.95 – 1.83 (m, 2H), 1.81 – 1.71 (m, 1H).

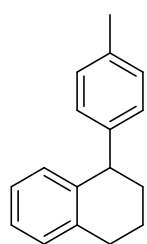

**2c:** 1-(p-tolyl)-1,2,3,4-tetrahydronaphthalene.<sup>[8]</sup>

**2c** was synthesized according to the general synthetic **method C** with **1c** (24.0 mg, 0.1 mmol),  $\text{Re}_2\text{O}_7 \cdot \text{SiO}_2$  (9.6 mg, 0.001 mmol), and HFIP (0.2 mL). The reaction was stirred at room temperature for 1 hour, then quenched with 20  $\mu\text{l}$   $\text{Et}_3\text{N}$ , concentrated under vacuum and purified through flash chromatography (100% petroleum ether) to give the desired product as a colorless oil (20.7 mg, 93% yield). **<sup>1</sup>H NMR** (400 MHz, Chloroform-d)  $\delta$  7.16 – 7.07 (m, 4H), 7.06 – 6.97 (m, 3H), 6.85 (d,  $J = 7.8$  Hz, 1H), 4.08 (t,  $J = 6.7$  Hz, 1H), 2.88 (m, 2H), 2.33 (s, 3H), 2.15 (m, 1H), 1.95 – 1.69 (m, 3H).

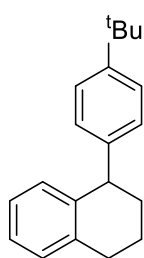

**2d:** 1-(4-*t*-butylphenyl)-1,2,3,4-tetrahydronaphthalene.

**2d** was synthesized according to the general synthetic **method C** with **1d** (28.2 mg, 0.1 mmol),  $\text{Re}_2\text{O}_7 \cdot \text{SiO}_2$  (9.6 mg, 0.001 mmol), and HFIP (0.2 mL). The reaction was stirred at room temperature for 1 hour, then quenched with 20  $\mu\text{l}$   $\text{Et}_3\text{N}$ , concentrated under vacuum and purified through flash chromatography (100% petroleum ether) to give the desired product as a colorless oil (24.8 mg, 94% yield). **<sup>1</sup>H NMR** (600 MHz, Chloroform-d)  $\delta$  7.55 (d,  $J = 8.3$  Hz, 2H), 7.39 – 7.35 (m, 2H), 7.29 – 7.27 (m, 2H), 7.14 (d,  $J = 7.9$  Hz, 1H), 4.36 (t,  $J = 6.6$  Hz, 1H), 3.17 (ddd,  $J = 17.0, 7.7, 5.4$  Hz, 1H), 3.09 (dt,  $J = 16.9, 6.0$  Hz, 1H), 2.43 – 2.38 (m, 1H), 2.18 – 2.12 (m, 2H), 2.03 – 1.97 (m, 1H), 1.59 (s, 9H). **<sup>13</sup>C NMR** (101 MHz, Chloroform-d)  $\delta$  148.6, 144.4, 139.6, 137.5, 130.3, 129.0, 128.5, 125.9, 125.7, 125.1, 45.2, 34.4, 33.3, 31.6, 29.9, 21.0. **GC-MS**  $m/z$  (EI): calcd. for  $\text{C}_{20}\text{H}_{24}$   $[\text{M}]^+$ : 264.19; found: 264.19.

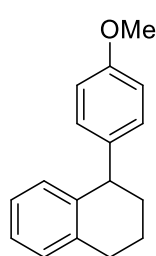

**2e:** 1-(4-methoxyphenyl)-1,2,3,4-tetrahydronaphthalene.<sup>[2]</sup>

**2e** was synthesized according to the general synthetic **method C** with **1e** (25.6 mg, 0.1 mmol),  $\text{Re}_2\text{O}_7 \cdot \text{SiO}_2$  (0.96 mg, 0.0001 mmol), and HFIP (0.2 mL). The reaction was stirred at room temperature for 1 hour, then quenched with 20  $\mu\text{l}$   $\text{Et}_3\text{N}$ , concentrated under vacuum and purified through flash chromatography (100% petroleum ether) to give the desired product as a light yellow oil (23.3 mg, 98% yield). **<sup>1</sup>H NMR** (400 MHz, Chloroform-d)  $\delta$  7.15 – 7.11 (m, 2H), 7.07 – 7.01 (m, 3H), 6.88 – 6.83 (m, 3H), 4.09 (t,  $J = 6.7$  Hz, 1H), 3.80 (s, 3H), 2.88 (m, 2H), 2.16 (m, 1H), 1.93 – 1.85 (m, 2H), 1.77 – 1.72 (m, 1H); **<sup>13</sup>C NMR** (101 MHz, Chloroform-d)  $\delta$  157.8, 139.8, 139.7, 137.5, 130.0, 129.7, 129.0, 125.6, 125.6, 113.4, 55.3, 44.8, 33.4, 29.8, 21.0.



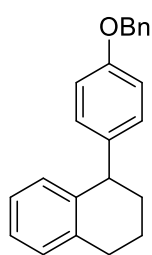

**2f:** 1-(4-(benzyloxy)phenyl)-1,2,3,4-tetrahydronaphthalene.

**2f** was synthesized according to the general synthetic **method C** with **1f** (33.2 mg, 0.1 mmol),  $\text{Re}_2\text{O}_7 \cdot \text{SiO}_2$  (9.6 mg, 0.0001 mmol), and HFIP (0.2 mL). The reaction was stirred at room temperature for 1 hour, then quenched with 20  $\mu\text{l}$   $\text{Et}_3\text{N}$ , concentrated under vacuum and purified through flash chromatography (100% petroleum ether) to give the desired product as a white solid (26.2 mg, 83% yield).  **$^1\text{H NMR}$**  (400 MHz, Chloroform- $d$ )  $\delta$  7.47 – 7.36 (m, 4H), 7.36 – 7.31 (m, 1H), 7.16 – 7.11 (m, 2H), 7.07 – 6.99 (m, 3H), 6.94 – 6.89 (m, 2H), 6.89 – 6.84 (m, 1H), 5.04 (s, 2H), 4.08 (t,  $J$  = 6.7 Hz, 1H), 2.98 – 2.79 (m, 2H), 2.21 – 2.10 (m, 1H), 1.95 – 1.69 (m, 3H).  **$^{13}\text{C NMR}$**  (101 MHz, Chloroform- $d$ )  $\delta$  157.2, 140.1, 139.8, 137.6, 137.3, 130.3, 129.8, 129.1, 128.7, 128.0, 127.6, 126.0, 125.7, 114.6, 70.1, 44.9, 33.4, 29.9, 21.1. **HRMS**  $m/z$  (ESI): calcd: for  $\text{C}_{23}\text{H}_{22}\text{NaO}$  [ $\text{M}+\text{Na}$ ] $^+$ : 337.1563; found: 337.1516.

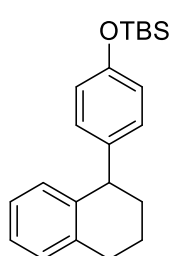

**2g:** tert-butyldimethyl(4-(1,2,3,4-tetrahydronaphthalen-1-yl)phenoxy)silane.

**2g** was synthesized according to the general synthetic **method C** with **1g** (35.6 mg, 0.1 mmol),  $\text{Re}_2\text{O}_7 \cdot \text{SiO}_2$  (9.6 mg, 0.0001 mmol), and HFIP (0.2 mL). The reaction was stirred at room temperature for 1 hour, then quenched with 20  $\mu\text{l}$   $\text{Et}_3\text{N}$ , concentrated under vacuum and purified through flash chromatography (100% petroleum ether) to give the desired product as a white solid (26.3 mg, 78% yield).  **$^1\text{H NMR}$**  (600 MHz, Chloroform- $d$ )  $\delta$  7.16 – 7.11 (m, 2H), 7.05 (t,  $J$  = 7.0 Hz, 1H), 6.98 – 6.94 (m, 2H), 6.88 (d,  $J$  = 7.8 Hz, 1H), 6.78 – 6.76 (m, 2H), 4.07 (t,  $J$  = 6.7 Hz, 1H), 2.95 – 2.83 (m, 2H), 2.18 – 2.13 (m, 1H), 1.94 – 1.83 (m, 2H), 1.80 – 1.75 (m, 1H), 1.01 (s, 9H), 0.22 (s, 6H).  **$^{13}\text{C NMR}$**  (101 MHz, Chloroform- $d$ )  $\delta$  153.8, 140.3, 139.9, 137.6, 130.3, 129.8, 129.0, 125.9, 125.7, 119.8, 45.0, 33.4, 29.9, 25.8, 21.1, 18.3, -4.2; **HRMS**  $m/z$  (ESI): calcd: for  $\text{C}_{22}\text{H}_{31}\text{OSi}$  [ $\text{M}+\text{H}$ ] $^+$ : 339.2139; found: 339.2122

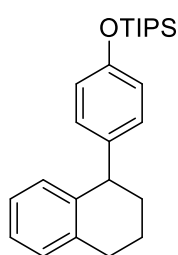

**2h:** triisopropyl(4-(1,2,3,4-tetrahydronaphthalen-1-yl)phenoxy)silane.

**2h** was synthesized according to the general synthetic **method C** with **1h** (39.8 mg, 0.1 mmol),  $\text{Re}_2\text{O}_7 \cdot \text{SiO}_2$  (9.6 mg, 0.0001 mmol), and HFIP (0.2 mL). The reaction was stirred at room temperature for 1 hour, then quenched with 20  $\mu\text{l}$   $\text{Et}_3\text{N}$ , concentrated under vacuum and purified through flash chromatography (100% petroleum ether) to give the desired product as a white solid (20.1 mg, 53% yield).  **$^1\text{H NMR}$**  (600 MHz, Chloroform- $d$ )  $\delta$  7.13 – 7.11 (m, 2H), 7.05 – 7.03 (m, 1H), 6.94 (dd,  $J$  = 8.5, 2.7 Hz, 2H), 6.86 (d,  $J$  = 7.8 Hz, 1H), 6.83 – 6.80 (m, 2H), 4.05 (t,  $J$  = 6.8 Hz, 1H), 2.94 – 2.82 (m, 2H), 2.17 – 2.12 (m, 1H), 1.91 – 1.83 (m, 2H), 1.79 – 1.73 (m, 1H), 1.27 (tdd,  $J$  = 15.1, 8.6, 5.0 Hz, 3H), 1.12 (dd,  $J$  = 7.7, 2.9 Hz, 18H);  **$^{13}\text{C NMR}$**  (151 MHz, Chloroform- $d$ )  $\delta$  154.3, 140.0, 134.0, 137.6, 130.2, 129.7, 129.0, 125.9, 125.7, 119.7, 45.0, 33.4, 29.9, 21.2, 18.1, 12.8. **HRMS**  $m/z$  (ESI): calcd: for  $\text{C}_{25}\text{H}_{37}\text{OSi}$  [ $\text{M}+\text{H}$ ] $^+$ : 381.2608; found: 381.2602.

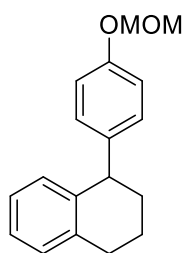

**2i:** 1-(4-(methoxymethoxy)phenyl)-1,2,3,4-tetrahydronaphthalene

**2i** was synthesized according to the general synthetic **method C** with **1i** (28.6 mg, 0.1 mmol),  $\text{Re}_2\text{O}_7 \cdot \text{SiO}_2$  (9.6 mg, 0.0001 mmol), and HFIP : DCM = 1:1 (0.2 mL). The reaction was stirred at - 20 °C for 1 hour, then quenched with 20  $\mu\text{l}$   $\text{Et}_3\text{N}$ , concentrated under vacuum and purified through flash chromatography (100% petroleum ether) to give the desired product as a white solid (24.9 mg, 93% yield).  **$^1\text{H}$  NMR** (600 MHz, Chloroform-d)  $\delta$  7.21 – 7.16 (m, 2H), 7.11 – 7.08 (m, 3H), 7.04 – 7.03 (m, 2H), 6.93 (d,  $J$  = 7.8 Hz, 1H), 5.22 (s, 2H), 4.15 (t,  $J$  = 6.6 Hz, 1H), 3.55 (s, 3H), 3.02 – 2.88 (m, 2H), 2.24 – 2.19 (m, 1H), 1.99 – 1.89 (m, 2H), 1.85 – 1.79 (m, 1H);  **$^{13}\text{C}$  NMR** (151 MHz, Chloroform-d)  $\delta$  155.6, 141.1, 139.7, 137.6, 130.2, 129.8, 129.0, 126.0, 125.7, 116.1, 94.7, 56.0, 44.9, 33.4, 29.9, 21.0; **HRMS**  $m/z$  (ESI): calcd: for  $\text{C}_{18}\text{H}_{20}\text{NaO}_2\text{Si}$   $[\text{M}+\text{Na}]^+$ : 291.1356; found: 291.1362.

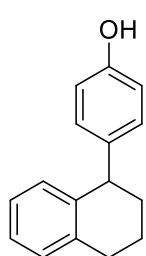

**2j:** 4-(1,2,3,4-tetrahydronaphthalen-1-yl)phenol.<sup>[2]</sup>

**2j** was synthesized according to the following method with **1j** (24.3 mg, 0.1 mmol),  $\text{Re}_2\text{O}_7 \cdot \text{SiO}_2$  (0.96 mg, 0.0001 mmol), and HFIP : DCM = 1:1 (0.2 mL). The reaction was stirred at - 20 °C for 1 hour, then quenched with 20  $\mu\text{l}$   $\text{Et}_3\text{N}$ , concentrated under vacuum and purified through flash chromatography (100% petroleum ether) to give the desired product as a white solid (22.0 mg, 98% yield).  **$^1\text{H}$  NMR** (400 MHz, Chloroform-d)  $\delta$  7.13 (d,  $J$  = 6.0 Hz, 2H), 7.06 – 7.02 (m, 1H), 6.97 (d,  $J$  = 8.6 Hz, 1H), 6.88 (d,  $J$  = 7.8 Hz, 1H), 6.76 (d,  $J$  = 8.4 Hz, 2H), 4.78 (s, 1H), 4.08 (t,  $J$  = 6.7 Hz, 1H), 2.95 – 2.80 (m, 2H), 2.18 – 2.08 (m, 1H), 1.95 – 1.72 (m, 3H).

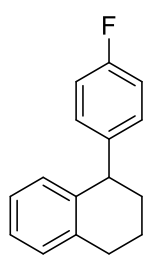

**2k:** 1-(4-fluorophenyl)-1,2,3,4-tetrahydronaphthalene.<sup>[9]</sup>

**2k** was synthesized according to the general synthetic **method C** with **1k** (24.4 mg, 0.1 mmol),  $\text{Re}_2\text{O}_7 \cdot \text{SiO}_2$  (0.96 mg, 0.0001 mmol), and HFIP (0.2 mL). The reaction was stirred at room temperature for 1 hour, then quenched with 20  $\mu\text{l}$   $\text{Et}_3\text{N}$ , concentrated under vacuum and purified through flash chromatography (100% petroleum ether) to give the desired product as a yellow oil (20.1 mg, 89% yield).  **$^1\text{H}$  NMR** (400 MHz, Chloroform-d)  $\delta$  7.15 – 7.09 (m, 2H), 7.04 (m, 3H), 7.00 – 6.92 (m, 2H), 6.83 – 6.80 (m, 1H), 4.11 (t,  $J$  = 6.6 Hz, 1H), 2.97 – 2.80 (m, 2H), 2.20 – 2.10 (m, 1H), 1.92 – 1.75 (m, 3H).

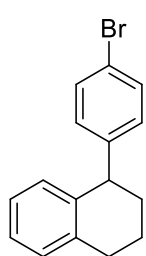

**2l:** 1-(4-bromophenyl)-1,2,3,4-tetrahydronaphthalene.

**2l** was synthesized according to the general synthetic **method C** with **1l** (30.5 mg, 0.1 mmol),  $\text{Re}_2\text{O}_7 \cdot \text{SiO}_2$  (0.96 mg, 0.0001 mmol), and HFIP (0.2 mL). The reaction was stirred at room temperature for 1 hour, then quenched with 20  $\mu\text{l}$   $\text{Et}_3\text{N}$ , concentrated under vacuum and purified through flash chromatography (100% petroleum ether) to give the desired

product as a colorless oil (26.4 mg, 92% yield). **<sup>1</sup>H NMR** (400 MHz, Chloroform-d)  $\delta$  7.41 – 7.26 (m, 2H), 7.21 – 6.93 (m, 5H), 6.86 – 6.73 (m, 1H), 4.09 (t,  $J$  = 6.7 Hz, 1H), 2.95 – 2.80 (m, 2H), 2.17 – 2.13 (m, 1H), 1.90 – 1.75 (m, 3H); **<sup>13</sup>C NMR** (101 MHz, Chloroform-d)  $\delta$  146.7, 138.8, 137.7, 131.4, 130.7, 130.2, 129.2, 126.3, 125.9, 119.9, 45.2, 33.3, 29.8, 20.9; **GC-MS**  $m/z$  (EI): C<sub>16</sub>H<sub>15</sub>Br [M]<sup>+</sup>: calcd. 286.04; found: 286.10.

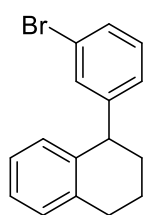

**2m**: 1-(3-bromophenyl)-1,2,3,4-tetrahydronaphthalene.

**2m** was synthesized according to the general synthetic **method C** with **1m** (30.5 mg, 0.1 mmol), Re<sub>2</sub>O<sub>7</sub>•SiO<sub>2</sub> (0.96 mg, 0.0001 mmol), and HFIP (0.2 mL). The reaction was stirred at room temperature for 1 hour, then quenched with 20  $\mu$ l Et<sub>3</sub>N, concentrated under vacuum and purified through flash chromatography (100% petroleum ether) to give the desired product as a yellow oil (27.3 mg, 95% yield). **<sup>1</sup>H NMR** (400 MHz, Chloroform-d)  $\delta$  7.37 – 7.34 (m, 1H), 7.16 (d,  $J$  = 4.0 Hz, 1H), 7.07 (ddd,  $J$  = 8.4, 5.2, 3.3 Hz, 3H), 7.06 – 7.02 (m, 2H), 6.84 (d,  $J$  = 7.7 Hz, 1H), 4.11 (t,  $J$  = 6.7 Hz, 1H), 3.01 – 2.83 (m, 2H), 2.24 – 2.15 (m, 1H), 1.96 – 1.72 (m, 3H). **<sup>13</sup>C NMR** (101 MHz, Chloroform-d)  $\delta$  150.1, 138.6, 137.7, 131.9, 130.2, 129.9, 129.2, 127.7, 126.3, 125.9, 122.6, 45.5, 33.3, 29.8, 21.0; **GC-MS**  $m/z$  (EI): calcd. for C<sub>16</sub>H<sub>15</sub>Br [M]<sup>+</sup>: 286.04; found: 286.10.

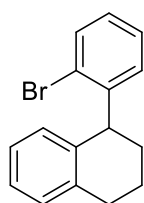

**2n**: 1-(2-bromophenyl)-1,2,3,4-tetrahydronaphthalene.

**2n** was synthesized according to the general synthetic **method C** with **1n** (30.5 mg, 0.1 mmol), Re<sub>2</sub>O<sub>7</sub>•SiO<sub>2</sub> (0.96 mg, 0.0001 mmol), and HFIP (0.2 mL). The reaction was stirred at room temperature for 1 hour, then quenched with 20  $\mu$ l Et<sub>3</sub>N, concentrated under vacuum and purified through flash chromatography (100% petroleum ether) to give the desired product as a light yellow oil (28.1 mg, 98% yield). **<sup>1</sup>H NMR** (400 MHz, Chloroform-d)  $\delta$  7.59 (dd,  $J$  = 7.9, 1.4 Hz, 1H), 7.19 – 7.12 (m, 3H), 7.06 (m, 2H), 6.86 – 6.80 (m, 2H), 4.65 (t,  $J$  = 6.4 Hz, 1H), 2.96 – 2.84 (m, 2H), 2.20 – 2.15 (m, 1H), 1.90 – 1.77 (m, 3H); **<sup>13</sup>C NMR** (101 MHz, Chloroform-d)  $\delta$  146.5, 138.8, 138.0, 132.8, 131.1, 130.2, 129.2, 127.6, 127.4, 126.2, 126.0, 124.8, 44.5, 31.0, 29.9, 20.8; **GC-MS**  $m/z$  (EI): calcd. for C<sub>16</sub>H<sub>15</sub>Br [M]<sup>+</sup>: 286.04; found: 286.10.

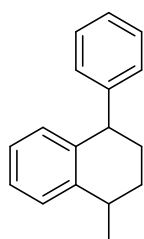

**2o**: 1-methyl-4-phenyl-1,2,3,4-tetrahydronaphthalene.<sup>[10]</sup>

**2o** was synthesized according to the general synthetic **method C** with **1o** (24.0 mg, 0.1 mmol), Re<sub>2</sub>O<sub>7</sub>•SiO<sub>2</sub> (0.96 mg, 0.0001 mmol), and HFIP (0.2 mL). The reaction was stirred at r.t. for 1 hour, then quenched with 20  $\mu$ l Et<sub>3</sub>N, concentrated under vacuum and purified through flash chromatography (100% petroleum ether) to give the desired product as a light yellow oil (20.2 mg, 91% yield). **<sup>1</sup>H NMR** (400 MHz, Chloroform-d)  $\delta$  7.30 – 7.26 (m, 2H), 7.25 (d,  $J$  = 6.7 Hz, 1H), 7.22 – 7.14 (m, 2H), 7.09 (m, 2H), 7.03 (m, 1H), 6.83 (m, 1H), 4.12 (t,  $J$  = 6.7 Hz, 1H), 3.02 (m, 1H), 2.07 – 1.88 (m, 3H), 1.60 (m, 1H), 1.35 (d,  $J$  = 7.0 Hz, 3H); **<sup>13</sup>C NMR** (101 MHz, Chloroform-d)  $\delta$

147.4, 142.8, 139.0, 130.0, 128.9, 128.2, 129.2, 126.0, 125.9, 125.6, 46.0, 32.7, 29.8, 28.7, 23.3.

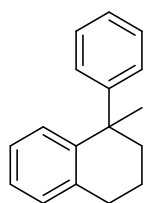

**2p**: 1-methyl-1-phenyl-1,2,3,4-tetrahydronaphthalene.<sup>[11]</sup>

**2p** was synthesized according to the general synthetic **method C** with **1p** (24.0 mg, 0.1 mmol),  $\text{Re}_2\text{O}_7 \cdot \text{SiO}_2$  (0.96 mg, 0.0001 mmol), and HFIP (0.2 mL). The reaction was stirred at room temperature for 1 hour, then quenched with 20  $\mu\text{l}$   $\text{Et}_3\text{N}$ , concentrated under vacuum and purified through flash chromatography (100% petroleum ether) to give the desired product as a light yellow oil (20.7 mg, 93% yield).  **$^1\text{H NMR}$**  (400 MHz, Chloroform- $d$ )  $\delta$  7.27 – 7.23 (m, 2H), 7.18 – 7.06 (m, 6H), 7.02 – 6.99 (m, 1H), 2.85 (t,  $J$  = 6.5 Hz, 2H), 2.09 – 2.04 (m, 1H), 1.92 – 1.89 (m, 1H), 1.88 – 1.75 (m, 1H), 1.74 (s, 3H), 1.71 – 1.68 (m, 1H);  **$^{13}\text{C NMR}$**  (101 MHz, Chloroform- $d$ )  $\delta$  151.7, 144.5, 137.2, 129.3, 129.1, 127.9, 127.6, 125.9, 125.8, 125.6, 43.1, 41.6, 30.4, 30.2, 19.7.

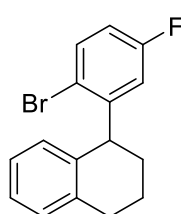

**2q**: 1-(5-bromo-2-fluorophenyl)-1,2,3,4-tetrahydronaphthalene.

**2q** was synthesized according to the general synthetic **method C** with **1q** (33.7 mg, 0.1 mmol),  $\text{Re}_2\text{O}_7 \cdot \text{SiO}_2$  (0.96 mg, 0.0001 mmol), and HFIP (0.2 mL). The reaction was stirred at room temperature for 1 hour, then quenched with 20  $\mu\text{l}$   $\text{Et}_3\text{N}$ , concentrated under vacuum and purified through flash chromatography (100% petroleum ether) to give the desired product as a yellow oil (28.7 mg, 90% yield).  **$^1\text{H NMR}$**  (400 MHz, Chloroform- $d$ )  $\delta$  7.30 (ddd,  $J$  = 8.6, 4.5, 2.6 Hz, 1H), 7.18 – 7.14 (m, 2H), 7.11 – 7.04 (m, 1H), 7.00 – 6.97 (m, 1H), 6.97 – 6.92 (m, 1H), 6.83 (dd,  $J$  = 7.6, 1.0 Hz, 1H), 4.44 (t,  $J$  = 6.5 Hz, 1H), 2.96 – 2.80 (m, 2H), 2.15 – 2.09 (m, 1H), 1.93 – 1.76 (m, 3H);  **$^{13}\text{C NMR}$**  (101 MHz, Chloroform- $d$ )  $\delta$  160.0 (d,  $J$  = 246.1 Hz), 137.9, 137.4, 136.7 (d,  $J$  = 15.5 Hz), 133.6 (d,  $J$  = 4.8 Hz), 130.6 (d,  $J$  = 8.4 Hz), 129.8, 129.4, 126.5, 126.1, 117.2 (d,  $J$  = 24.4 Hz), 116.6 (d,  $J$  = 3.3 Hz), 38.5 (d,  $J$  = 2.2 Hz), 31.2, 29.7, 21.0; **GC-MS**  $m/z$  (EI) calcd. for  $\text{C}_{16}\text{H}_{14}\text{BrF}$   $[\text{M}]^+$ : 304.03; found: 304.10.

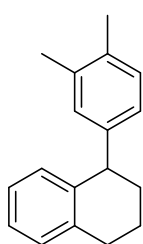

**2r**: 1-(3,4-dimethylphenyl)-1,2,3,4-tetrahydronaphthalene.

**2r** was synthesized according to the general synthetic **method C** with **1r** (25.4 mg, 0.1 mmol),  $\text{Re}_2\text{O}_7 \cdot \text{SiO}_2$  (0.96 mg, 0.0001 mmol), and HFIP (0.2 mL). The reaction was stirred at room temperature for 1 hour, then quenched with 20  $\mu\text{l}$   $\text{Et}_3\text{N}$ , concentrated under vacuum and purified through flash chromatography (100% petroleum ether) to give the desired product as a colorless oil (22.2 mg, 94% yield).  **$^1\text{H NMR}$**  (400 MHz, Chloroform- $d$ )  $\delta$  7.20 – 7.12 (m, 2H), 7.11 – 7.04 (m, 2H), 6.95 (d,  $J$  = 1.9 Hz, 1H), 6.91 (d,  $J$  = 7.7 Hz, 1H), 6.87 (dd,  $J$  = 7.7, 1.9 Hz, 1H), 4.10 (t,  $J$  = 6.9 Hz, 1H), 2.93 (m, 2H), 2.29 (s, 3H), 2.29 (s, 3H), 2.23 – 2.15 (m, 1H), 2.01 – 1.75 (m, 3H);  **$^{13}\text{C NMR}$**  (101 MHz, Chloroform- $d$ )  $\delta$  145.1, 139.8, 137.6, 136.4, 134.2, 130.3, 130.2, 129.6, 129.0, 126.4, 125.9, 125.7, 45.4, 33.5, 30.0, 21.3, 20.0, 19.5; **GC-MS**  $m/z$  (EI): calcd. for  $\text{C}_{18}\text{H}_{20}$   $[\text{M}]^+$ : 236.16; found: 236.20.

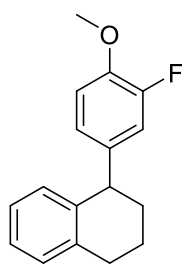

**2s:** 1-(3-fluoro-4-methoxyphenyl)-1,2,3,4-tetrahydronaphthalene.

**2s** was synthesized according to the general synthetic **method C** with **1s** (27.4 mg, 0.1 mmol),  $\text{Re}_2\text{O}_7 \cdot \text{SiO}_2$  (0.96 mg, 0.0001 mmol), and HFIP (0.2 mL). The reaction was stirred at room temperature for 1 hour, then quenched with 20  $\mu\text{l}$   $\text{Et}_3\text{N}$ , concentrated under vacuum and purified through flash chromatography (100% petroleum ether) to give the desired product as a yellow oil (24.9 mg, 97% yield).  **$^1\text{H NMR}$**  (400 MHz, Chloroform-*d*)  $\delta$  7.14 – 7.13 (m, 2H), 7.06 – 7.04 (m, 1H), 6.89 – 6.84 (m, 2H), 6.83 – 6.80 (m, 2H), 4.06 (t,  $J = 6.5$  Hz, 1H), 3.88 (m, 3H), 2.93 – 2.81 (m, 2H), 2.16 – 2.12 (m, 1H), 1.90 – 1.74 (m, 3H);  **$^{13}\text{C NMR}$**  (101 MHz, Chloroform-*d*)  $\delta$  152.4 (d,  $J = 245.1$  Hz), 145.9 (d,  $J = 10.9$  Hz), 140.9 (d,  $J = 5.4$  Hz), 139.1, 137.6, 130.2, 129.2, 126.2, 125.8, 124.4 (d,  $J = 3.4$  Hz), 116.5 (d,  $J = 18.1$  Hz), 113.3 (d,  $J = 2.3$  Hz), 56.5, 44.8 (d,  $J = 1.4$  Hz), 33.3, 29.8, 20.9; **HRMS**  $m/z$  (ESI): calcd. for  $\text{C}_{17}\text{H}_{18}\text{FO}$   $[\text{M}+\text{H}]^+$ : 257.1336; found: 257.1338.

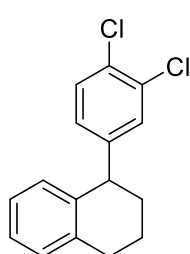

**2t:** 1-(3,4-dichlorophenyl)-1,2,3,4-tetrahydronaphthalene.<sup>[12]</sup>

**2t** was synthesized according to the general synthetic **method C** with **1t** (29.5 mg, 0.1 mmol),  $\text{Re}_2\text{O}_7 \cdot \text{SiO}_2$  (0.96 mg, 0.0001 mmol), and HFIP (0.2 mL). The reaction was stirred at room temperature for 1 hour, then quenched with 20  $\mu\text{l}$   $\text{Et}_3\text{N}$ , concentrated under vacuum and purified through flash chromatography (100% petroleum ether) to give the desired product as a colorless oil (25.5 mg, 92% yield).  **$^1\text{H NMR}$**  (400 MHz, Chloroform-*d*)  $\delta$  7.33 (d,  $J = 8.3$  Hz, 1H), 7.18 (d,  $J = 2.1$  Hz, 1H), 7.16 – 7.11 (m, 2H), 7.06 (m, 1H), 6.92 (dd,  $J = 8.2, 2.1$  Hz, 1H), 6.79 (d,  $J = 7.7$  Hz, 1H), 4.08 (t,  $J = 6.5$  Hz, 1H), 2.97 – 2.78 (m, 2H), 2.21 – 2.10 (m, 1H), 1.91 – 1.71 (m, 3H).

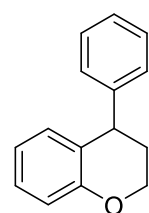

**2u:** 4-phenylchromane.<sup>[13]</sup>

**2u** was synthesized according to the general synthetic **method C** with **1u** (22.8 mg, 0.1 mmol),  $\text{Re}_2\text{O}_7 \cdot \text{SiO}_2$  (0.96 mg, 0.0001 mmol), and HFIP (0.2 mL). The reaction was stirred at room temperature for 1 hour, then quenched with 20  $\mu\text{l}$   $\text{Et}_3\text{N}$ , concentrated under vacuum and purified through flash chromatography (100% petroleum ether) to give the desired product as a colorless oil (20.6 mg, 98% yield).  **$^1\text{H NMR}$**  (400 MHz, Chloroform-*d*)  $\delta$  7.35 – 7.29 (m, 2H), 7.28 – 7.21 (m, 1H), 7.15 (ddd,  $J = 8.7, 7.2, 1.8$  Hz, 3H), 6.92 – 6.79 (m, 3H), 4.24 – 4.18 (m, 3H), 2.33 (dq,  $J = 13.8, 5.8$  Hz, 1H), 2.17 – 2.08 (m, 1H).

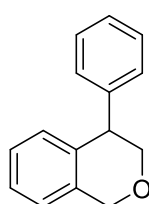

**2v:** 4-phenylisochromane.<sup>[14]</sup>

**2v** was synthesized according to the general synthetic **method C** with **1v** (22.8 mg, 0.1 mmol),  $\text{Re}_2\text{O}_7 \cdot \text{SiO}_2$  (0.96 mg, 0.0001 mmol), and HFIP (0.2 mL). The reaction was stirred at room temperature for 1 hour, then quenched with 20  $\mu\text{l}$   $\text{Et}_3\text{N}$ , concentrated under vacuum and purified through flash chromatography (100% petroleum ether) to give the desired product as a light

yellow oil (20.2 mg, 96% yield). **<sup>1</sup>H NMR** (400 MHz, Chloroform-*d*)  $\delta$  7.34 – 7.28 (m, 2H), 7.26 – 7.16 (m, 4H), 7.12 (ddd,  $J = 7.2, 6.8, 1.2$  Hz, 1H), 7.06 (dd,  $J = 7.5, 1.3$  Hz, 1H), 6.95 (d,  $J = 7.6$  Hz, 1H), 4.98 – 4.86 (m, 2H), 4.21 – 4.16 (m, 2H), 3.94 – 3.88 (m, 1H). **<sup>13</sup>C NMR** (101 MHz, Chloroform-*d*)  $\delta$  143.2, 136.5, 135.0, 129.7, 129.1, 128.6, 126.9, 126.8, 126.5, 124.3, 72.3, 68.6, 44.6.

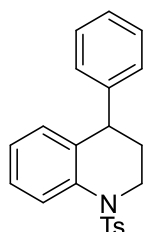

**2w**: 4-phenyl-1-tosyl-1,2,3,4-tetrahydroquinoline.

**2w** was synthesized according to the general synthetic **method C** with **1w** (38.1 mg, 0.1 mmol),  $\text{Re}_2\text{O}_7 \cdot \text{SiO}_2$  (0.96 mg, 0.0001 mmol), and HFIP (0.2 mL). The reaction was stirred at room temperature for 1 hour, then quenched with 20  $\mu\text{l}$   $\text{Et}_3\text{N}$ , concentrated under vacuum and purified through flash chromatography (100% petroleum ether to 5% ethyl acetate in petroleum ether) to give the desired product as a white solid (34.3 mg, 94% yield). **<sup>1</sup>H NMR** (400 MHz, Chloroform-*d*)  $\delta$  7.96 (dd,  $J = 8.4, 1.2$  Hz, 1H), 7.55 – 7.53 (m, 2H), 7.25 – 7.19 (m, 3H), 7.18 – 7.12 (m, 3H), 7.01 (td,  $J = 7.5, 1.3$  Hz, 1H), 6.75 (dt,  $J = 7.7, 1.3$  Hz, 1H), 6.77 – 6.61 (m, 2H), 4.11 (ddd,  $J = 13.8, 5.8, 3.7$  Hz, 1H), 3.86 (dd,  $J = 9.0, 6.6$  Hz, 1H), 3.73 (ddd,  $J = 13.6, 10.2, 3.2$  Hz, 1H), 2.43 (s, 3H), 1.98 – 1.90 (m, 1H), 1.73 – 1.64 (m, 1H); **<sup>13</sup>C NMR** (101 MHz, Chloroform-*d*)  $\delta$  145.0, 143.7, 137.1, 136.8, 132.7, 130.3, 129.7, 128.4, 128.3, 127.4, 123.0, 126.5, 125.1, 124.7, 45.5, 43.4, 30.3, 21.6; **HRMS**  $m/z$  (ESI): calcd. for  $\text{C}_{22}\text{H}_{22}\text{NO}_2\text{S}$   $[\text{M}+\text{H}]^+$ : 364.1366; found: 364.1367.

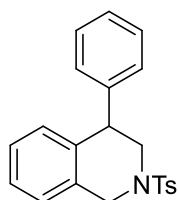

**2x**: 4-phenyl-2-tosyl-1,2,3,4-tetrahydroisoquinoline.<sup>[15]</sup>

**2x** was synthesized according to the general synthetic **method C** with **1x** (38.1 mg, 0.1 mmol),  $\text{Re}_2\text{O}_7 \cdot \text{SiO}_2$  (0.96 mg, 0.0001 mmol), and HFIP (0.2 mL). The reaction was stirred at room temperature for 1 hour, then was quenched with 20  $\mu\text{l}$   $\text{Et}_3\text{N}$ , concentrated under vacuum and purified through flash chromatography (100% petroleum ether to 5% ethyl acetate in petroleum ether) to give the desired product as a light yellow oil (34.9 mg, 96% yield). **<sup>1</sup>H NMR** (400 MHz, Chloroform-*d*)  $\delta$  7.67 – 7.65 (m, 2H), 7.31 – 7.23 (m, 5H), 7.21 – 7.14 (m, 1H), 7.13 – 7.07 (m, 4H), 6.87 – 6.85 (m, 1H), 4.51 (d,  $J = 14.9$  Hz, 1H), 4.35 – 4.26 (m, 1H), 4.17 (d,  $J = 15.0$  Hz, 1H), 3.80 (m, 1H), 3.06 (m, 1H), 2.41 (s, 3H); **<sup>13</sup>C NMR** (101 MHz, Chloroform-*d*)  $\delta$  142.5, 136.6, 132.1, 129.8, 129.7, 129.1, 128.7, 127.9, 127.2, 127.1, 126.8, 126.3, 51.2, 48.2, 45.4, 21.7.

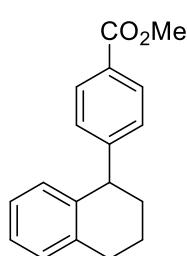

**2y**: methyl-4-(1,2,3,4-tetrahydronaphthalen-1-yl)benzoate.<sup>[2]</sup>

**2y** was synthesized according to the following method with **1y** (28.4 mg, 0.1 mmol),  $\text{Re}_2\text{O}_7 \cdot \text{SiO}_2$  (0.96 mg, 0.0001 mmol), and HFIP (0.2 mL). The reaction was stirred at room temperature for 4 hours, then quenched with 20  $\mu\text{l}$   $\text{Et}_3\text{N}$ , concentrated under vacuum and purified through flash chromatography (100% petroleum ether to 5% ethyl acetate in petroleum ether) to give the desired product as a light yellow oil (24.0 mg, 90% yield). **<sup>1</sup>H NMR** (400 MHz, Chloroform-*d*)  $\delta$  7.97 – 7.94 (m, 2H), 7.19 – 7.13 (m, 4H), 7.03 (ddd,  $J = 7.6,$



5.9, 2.8 Hz, 1H), 6.80 – 6.78 (m, 1H), 4.18 (t,  $J = 6.8$  Hz, 1H), 3.90 (s, 3H), 2.97 – 2.82 (m, 2H), 2.20 – 2.15 (m, 1H), 1.93 – 1.83 (m, 3H), 1.80 – 1.76 (m, 1H).

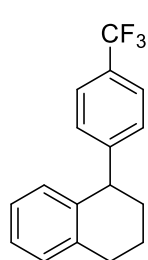

**2z:** 1-(4-(trifluoromethyl)phenyl)-1,2,3,4-tetrahydronaphthalene.<sup>[2]</sup>

**2z** was synthesized according to the following method with **1z** (29.4 mg, 0.1 mmol),  $\text{Re}_2\text{O}_7 \cdot \text{SiO}_2$  (0.96 mg, 0.0001 mmol), and HFIP (0.2 mL). The reaction was stirred at room temperature for 2 hours, then quenched with 20  $\mu\text{l}$   $\text{Et}_3\text{N}$ , concentrated under vacuum and purified through flash chromatography (100% petroleum ether) to give the desired product as a yellow oil (25.1 mg, 91% yield).  **$^1\text{H NMR}$**  (400 MHz, Chloroform- $d$ )  $\delta$  7.53 (d,  $J = 8.1$  Hz, 2H), 7.22 (d,  $J = 8.1$  Hz, 2H), 7.18 – 7.12 (m, 2H), 7.05 (m, 1H), 6.78 (d,  $J = 7.7$  Hz, 1H), 4.19 (t,  $J = 6.7$  Hz, 1H), 2.99 – 2.80 (m, 2H), 2.19 (m, 1H), 1.92 – 1.75 (m, 3H);  **$^{13}\text{C NMR}$**  (101 MHz, Chloroform- $d$ )  $\delta$  151.8 (q,  $J = 1.4$  Hz), 138.4, 137.8, 130.2, 129.3, 129.3, 128.4 (q,  $J = 32.4$  Hz), 125.8, 125.3 (q,  $J = 3.7$  Hz), 124.5 (q,  $J = 270.1$  Hz), 45.6, 33.3, 29.8, 20.9.

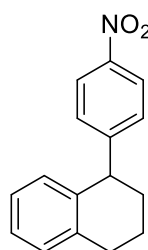

**2aa:** 1-(4-nitrophenyl)-1,2,3,4-tetrahydronaphthalene.

**2aa** was synthesized according to the following method with **1aa** (27.1 mg, 0.1 mmol),  $\text{Re}_2\text{O}_7 \cdot \text{SiO}_2$  (4.8 mg, 0.0005 mmol), and HFIP (0.2 mL). The reaction was stirred at 50  $^\circ\text{C}$  for 8 hours, then quenched with 20  $\mu\text{l}$   $\text{Et}_3\text{N}$ , concentrated under vacuum and purified through flash chromatography (100% petroleum ether) to give the desired product as a yellow oil (22.8 mg, 90% yield).  **$^1\text{H NMR}$**  (400 MHz, Chloroform- $d$ )  $\delta$  8.16 – 8.12 (m, 2H), 7.27 – 7.22 (m, 2H), 7.20 – 7.13 (m, 2H), 7.10 – 7.03 (m, 1H), 6.76 (d,  $J = 7.7$  Hz, 1H), 4.25 (t,  $J = 6.5$  Hz, 1H), 3.01 – 2.80 (m, 2H), 2.21 (m, 1H), 1.92 – 1.77 (m, 3H),  **$^{13}\text{C NMR}$**  (101 MHz, Chloroform- $d$ )  $\delta$  155.5, 146.5, 137.7, 130.1, 129.7, 129.5, 126.7, 126.1, 123.7, 45.7, 33.2, 29.7, 20.8; **HRMS**  $m/z$  (ESI): calcd. for  $\text{C}_{16}\text{H}_{16}\text{NO}_2$   $[\text{M}+\text{H}]^+$ : 254.1176; found: 254.1177.

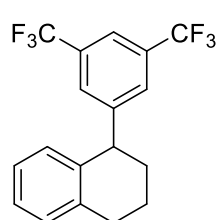

**2bb:** 1-(3,5-bis(trifluoromethyl)phenyl)-1,2,3,4-tetrahydronaphthalene.

**2bb** was synthesized according to the following method with **1bb** (36.2 mg, 0.1 mmol),  $\text{Re}_2\text{O}_7 \cdot \text{SiO}_2$  (4.8 mg, 0.0005 mmol), and HFIP (0.2 mL). The reaction was stirred at 50  $^\circ\text{C}$  for 8 hours, then quenched with 20  $\mu\text{l}$   $\text{Et}_3\text{N}$ , concentrated under vacuum and purified through flash chromatography (100% petroleum ether) to give the desired product as a yellow oil (32.4 mg, 94% yield).  **$^1\text{H NMR}$**  (400 MHz, Chloroform- $d$ )  $\delta$  7.73 (d,  $J = 1.6$  Hz, 1H), 7.55 (d,  $J = 1.6$  Hz, 2H), 7.21 – 7.15 (m, 2H), 7.07 – 7.05 (m, 1H), 6.75 – 6.73 (m, 1H), 4.27 (t,  $J = 6.6$  Hz, 1H), 3.00 – 2.84 (m, 2H), 2.25 – 2.19 (m, 1H), 1.91 – 1.77 (m, 3H);  **$^{13}\text{C NMR}$**  (101 MHz, Chloroform- $d$ )  $\delta$  150.2, 137.8, 137.3, 131.7 (q,  $J = 33.4, 33.0$  Hz), 129.9, 129.6, 129.0 (q,  $J = 3.8$  Hz), 126.9, 126.3, 123.6 (q,  $J = 272.5$  Hz), 120.4 (q,  $J = 4.0$  Hz), 45.7, 33.5, 29.7, 21.0; **GC-MS**  $m/z$  (EI):  $\text{C}_{18}\text{H}_{14}\text{F}_6$   $[\text{M}]^+$ : calcd. 344.10; found: 344.10.

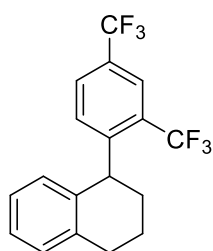

**2cc:** 1-(2,4-bis(trifluoromethyl)phenyl)-1,2,3,4-tetrahydronaphthalene.

**2cc** was synthesized according to the following method with **1cc** (36.2 mg, 0.1 mmol),  $\text{Re}_2\text{O}_7 \cdot \text{SiO}_2$  (4.8 mg, 0.0005 mmol), and HFIP (0.2 mL). The reaction was stirred at 50 °C for 8 hours, then quenched with 20  $\mu\text{l}$   $\text{Et}_3\text{N}$ , concentrated under vacuum and purified through flash chromatography (100% petroleum ether) to give the desired product as a yellow oil (31.7 mg, 96% yield).  **$^1\text{H NMR}$**  (400 MHz, Chloroform- $d$ )  $\delta$  7.94 (s, 1H), 7.65 (d,  $J$  = 8.4 Hz, 1H), 7.22 (d,  $J$  = 8.2 Hz, 1H), 7.19 – 7.11 (m, 2H), 7.02 (m, 1H), 6.64 (d,  $J$  = 7.8 Hz, 1H), 4.64 – 4.62 (m, 1H), 3.02 – 2.86 (m, 2H), 2.30 – 2.24 (m, 1H), 2.04 – 1.98 (m, 1H), 1.88 – 1.71 (m, 2H);  **$^{13}\text{C NMR}$**  (101 MHz, Chloroform- $d$ )  $\delta$  151.5, 138.6, 137.8, 132.3, 130.2, 129.3, 128.6 (q,  $J$  = 2.9 Hz), 126.5, 126.3, 122.9 (q,  $J$  = 11.2 Hz), 77.5, 77.2, 76.8, 41.5, 33.7, 29.9, 21.9; **GC-MS**  $m/z$  (EI): calcd. for  $\text{C}_{18}\text{H}_{14}\text{F}_6$   $[\text{M}]^+$ : 304.10; found: 304.10.

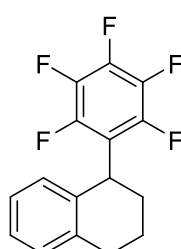

**2dd:** 1-(perfluorophenyl)-1,2,3,4-tetrahydronaphthalene.

**2dd** was synthesized according to the following method with **1dd** (31.6 mg, 0.1 mmol),  $\text{Re}_2\text{O}_7 \cdot \text{SiO}_2$  (4.8 mg, 0.0005 mmol), and HFIP (0.2 mL). The reaction was stirred at 50 °C for 8 hours, then quenched with 20  $\mu\text{l}$   $\text{Et}_3\text{N}$ , concentrated under vacuum and purified through flash chromatography (100% petroleum ether) to give the desired product as a yellow oil (28.6 mg, 96% yield).  **$^1\text{H NMR}$**  (400 MHz, Chloroform- $d$ )  $\delta$  7.15 – 7.09 (m, 2H), 7.08 – 6.99 (m, 1H), 6.72 (d,  $J$  = 7.7 Hz, 1H), 4.54 (m, 1H), 3.00 – 2.82 (m, 2H), 2.19 – 1.93 (m, 3H), 1.88 – 1.80 (m, 1H);  **$^{13}\text{C NMR}$**  (101 MHz, Chloroform- $d$ )  $\delta$  137.1, 136.5, 129.4, 127.6, 126.5, 126.2, 35.4, 30.2, 29.7, 23.1; **GC-MS**  $m/z$  (EI): calcd. for  $\text{C}_{16}\text{H}_{11}\text{F}_5$   $[\text{M}]^+$ : 298.08; found: 298.10.

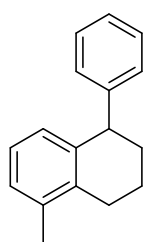

**2ee:** 5-methyl-1-phenyl-1,2,3,4-tetrahydronaphthalene.

**2ee** was synthesized according to the general synthetic **method C** with **1ee** (24.0 mg, 0.1 mmol),  $\text{Re}_2\text{O}_7 \cdot \text{SiO}_2$  (0.96 mg, 0.0001 mmol), and HFIP (0.2 mL). The reaction was stirred at room temperature for 1 hour, then quenched with 20  $\mu\text{l}$   $\text{Et}_3\text{N}$ , concentrated under vacuum and purified through flash chromatography (100% petroleum ether) to give the desired product as a light yellow oil (21.6 mg, 97% yield).  **$^1\text{H NMR}$**  (400 MHz, Chloroform- $d$ )  $\delta$  7.30 – 7.26 (m, 2H), 7.23 – 7.25 – 7.18 (m, 1H), 7.13 – 7.06 (m, 2H), 7.02 (dd,  $J$  = 7.4, 1.6 Hz, 1H), 6.96 (t,  $J$  = 7.5 Hz, 1H), 6.72 (d,  $J$  = 7.6 Hz, 1H), 4.16 (t,  $J$  = 6.4 Hz, 1H), 2.79 – 2.70 (m, 2H), 2.29 (s, 3H), 2.17 – 2.12 (m, 1H), 1.98 – 1.84 (m, 2H), 1.84 – 1.78 (m, 1H);  **$^{13}\text{C NMR}$**  (101 MHz, Chloroform- $d$ )  $\delta$  147.8, 139.4, 136.4, 136.2, 129.0, 128.3, 128.2, 127.6, 126.0, 125.3, 46.0, 32.7, 27.1, 20.7, 19.9; **GC-MS**  $m/z$  (EI): calcd. for  $\text{C}_{17}\text{H}_{18}$   $[\text{M}]^+$ : 222.14; found: 222.20.



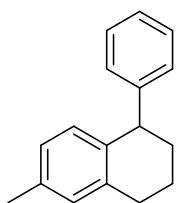

**2ff:** 6-methyl-1-phenyl-1,2,3,4-tetrahydronaphthalene.

**2ff** was synthesized according to the general synthetic **method C** with **1ff** (24.0 mg, 0.1 mmol),  $\text{Re}_2\text{O}_7 \cdot \text{SiO}_2$  (0.96 mg, 0.0001 mmol), and HFIP (0.2 mL). The reaction was stirred at room temperature for 1 hour, then quenched with 20  $\mu\text{l}$   $\text{Et}_3\text{N}$ , concentrated under vacuum and purified through flash chromatography (100% petroleum ether) to give the desired product as a colorless oil (20.0 mg, 90% yield).  **$^1\text{H NMR}$**  (400 MHz, Chloroform- $d$ )  $\delta$  7.33 – 7.19 (m, 3H), 7.15 – 7.10 (m, 2H), 6.99 (dd,  $J$  = 5.5 Hz, 1.8 Hz, 1H), 6.88 (dd,  $J$  = 7.9 Hz, 1.9 Hz, 1H), 6.75 (d,  $J$  = 7.9 Hz, 1H), 4.25 (t,  $J$  = 6.8 Hz, 0.16H), 4.10 (t,  $J$  = 6.8 Hz, 0.84H), 2.95 – 2.78 (m, 2H), 2.32 (s, 3H), 2.21 – 2.12 (m, 1H), 1.94 – 1.86 (m, 2H), 1.81 – 1.70 (m, 1H);  **$^{13}\text{C NMR}$**  (101 MHz, Chloroform- $d$ )  $\delta$  144.8, 140.6, 136.0, 130.3, 128.9, 128.6, 127.7, 126.0, 126.0, 126.0, 74.7, 39.0, 33.2, 26.5, 19.4; **GC-MS**  $m/z$  (EI): calcd. for  $\text{C}_{17}\text{H}_{18}$   $[\text{M}]^+$ : 222.14; found: 222.20.

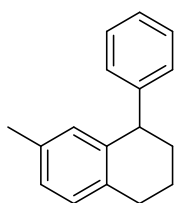

**2gg:** 7-methyl-1-phenyl-1,2,3,4-tetrahydronaphthalene.

**2gg** was synthesized according to the general synthetic **method C** with **1gg** (24.0 mg, 0.1 mmol),  $\text{Re}_2\text{O}_7 \cdot \text{SiO}_2$  (0.96 mg, 0.0001 mmol), and HFIP (0.2 mL). The reaction was stirred at room temperature for 1 hour, then quenched with 20  $\mu\text{l}$   $\text{Et}_3\text{N}$ , concentrated under vacuum and purified through flash chromatography (100% petroleum ether) to give the desired product as a light yellow oil (20.7 mg, 93% yield).  **$^1\text{H NMR}$**  (400 MHz, Chloroform- $d$ )  $\delta$  7.31 – 7.26 (m, 2H), 7.22 – 7.18 (m, 1H), 7.12 – 7.07 (m, 2H), 7.03 (d,  $J$  = 7.8 Hz, 1H), 6.97 – 6.91 (m, 1H), 6.66 (s, 1H), 4.08 (t,  $J$  = 6.6 Hz, 1H), 2.91 – 2.76 (m, 2H), 2.18 (s, 3H), 2.16 – 2.10 (m, 1H), 1.90 – 1.83 (m, 2H), 1.78 – 1.68 (m, 1H);  **$^{13}\text{C NMR}$**  (101 MHz, Chloroform- $d$ )  $\delta$  147.8, 139.2, 135.1, 134.7, 130.8, 129.0, 129.0, 128.3, 127.0, 126.0, 45.7, 33.5, 29.5, 21.1, 21.1; **GC-MS**  $m/z$  (EI): calcd. for  $\text{C}_{17}\text{H}_{18}$   $[\text{M}]^+$ : 222.14; found: 222.20.

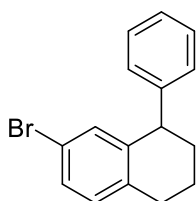

**2hh:** 7-bromo-1-phenyl-1,2,3,4-tetrahydronaphthalene.

**2hh** was synthesized according to the following method with **1hh** (30.5 mg, 0.1 mmol),  $\text{Re}_2\text{O}_7$  (0.48 mg, 0.001 mmol), and HFIP (0.2 mL). The reaction was stirred at 80  $^\circ\text{C}$  for 2 hours, then quenched with 20  $\mu\text{l}$   $\text{Et}_3\text{N}$ , concentrated under vacuum and purified through flash chromatography (100% petroleum ether) to give the desired product as a colorless oil (24.4 mg, 85% yield).  **$^1\text{H NMR}$**  (400 MHz, Chloroform- $d$ )  $\delta$  7.30 (dd,  $J$  = 8.1 Hz, 6.5 Hz, 2H), 7.25 – 7.20 (m, 2H), 7.10 – 7.05 (m, 2H), 7.03 – 6.97 (m, 2H), 4.08 (t,  $J$  = 6.8 Hz, 1H), 2.92 – 2.72 (m, 2H), 2.18 – 2.10 (m, 1H), 1.93 – 1.81 (m, 2H), 1.78 – 1.68 (m, 1H);  **$^{13}\text{C NMR}$**  (101 MHz, Chloroform- $d$ )  $\delta$  146.9, 142.0, 136.8, 133.0, 130.9, 129.3, 129.0, 128.7, 126.5, 119.5, 45.8, 33.2, 29.6, 21.0; **GC-MS**  $m/z$  (EI): calcd. for  $\text{C}_{16}\text{H}_{15}\text{Br}$   $[\text{M}]^+$ : 286.04; found: 286.00.

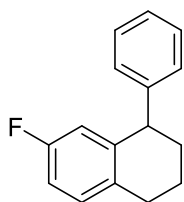

**2ii:** 7-fluoro-1-phenyl-1,2,3,4-tetrahydronaphthalene.

**2ii** was synthesized according to the following method with **1ii** (24.4 mg, 0.1 mmol),  $\text{Re}_2\text{O}_7$  (0.48 mg, 0.001 mmol), and HFIP (0.2 mL). The reaction was stirred at 80 °C for 2 hours, then quenched with 20  $\mu\text{l}$   $\text{Et}_3\text{N}$ , concentrated under vacuum and purified through flash chromatography (100% petroleum ether) to give the desired product as a colorless oil (10.2 mg, 45% yield).  **$^1\text{H NMR}$**  (400 MHz, Chloroform- $d$ )  $\delta$  7.34 – 7.28 (m, 2H), 7.26 – 7.20 (m, 1H), 7.14 – 7.06 (m, 3H), 6.84 (td,  $J$  = 8.4 Hz, 2.8 Hz, 1H), 6.55 (dd,  $J$  = 10.2 Hz, 2.7 Hz, 1H), 4.09 (t,  $J$  = 6.9 Hz, 1H), 2.93 – 2.76(m, 2H), 2.22 – 2.11 (m, 1H), 1.96 – 1.83 (m, 2H), 1.82 – 1.70 (m, 1H);  **$^{13}\text{C NMR}$**  (101 MHz, Chloroform- $d$ )  $\delta$  161.0 (d,  $J$  = 244.4 Hz), 146.7, 141.4 (d,  $J$  = 6.1 Hz), 133.1 (d,  $J$  = 3.0 Hz), 130.1 (d,  $J$  = 7.1 Hz), 128.8, 128.4, 126.2, 116.2 (d,  $J$  = 15.1 Hz), 113.1 (d,  $J$  = 21.2 Hz), 45.9, 45.9, 33.0, 29.1, 21.2; **GC-MS**  $m/z$  (EI): calcd. for  $\text{C}_{16}\text{H}_{15}\text{F}$   $[\text{M}]^+$ : 226.12; found: 226.20.

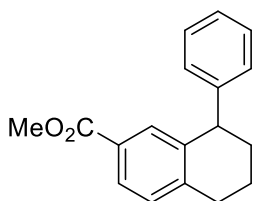

**2jj:** methyl-8-phenyl-5,6,7,8-tetrahydronaphthalene-2-carboxylate.

**2jj** was synthesized according to the following method with **1jj** (28.4 mg, 0.1 mmol),  $\text{Re}_2\text{O}_7$  (0.48 mg, 0.001 mmol), and HFIP (0.2 mL). The reaction was stirred at 100 °C for 12 hours, then quenched with 20  $\mu\text{l}$   $\text{Et}_3\text{N}$ , concentrated under vacuum and purified through flash chromatography (100% petroleum ether to 5% ethyl acetate in petroleum ether) to give the desired product as a colorless oil (11.9 mg, 45% yield).  **$^1\text{H NMR}$**  (400 MHz, Chloroform- $d$ )  $\delta$  7.78 (dd,  $J$  = 8.0, 1.9 Hz, 1H), 7.56 (t,  $J$  = 1.3 Hz, 1H), 7.31 – 7.25 (m, 2H), 7.23 – 7.17 (m, 2H), 7.08 – 7.02 (m, 2H), 4.17 (t,  $J$  = 6.4 Hz, 1H), 3.80 (s, 3H), 2.92 (qt,  $J$  = 17.4, 6.4 Hz, 2H), 2.20 – 2.13 (m, 1H), 1.93 – 1.83 (m, 2H), 1.80 – 1.70 (m, 1H);  **$^{13}\text{C NMR}$**  (101 MHz, Chloroform- $d$ )  $\delta$  167.3, 146.9, 143.3, 139.4, 131.6, 129.2, 128.8, 128.4, 127.7, 1267.0, 126.1, 51.9, 45.3, 33.0, 30.0, 20.3; **HRMS**  $m/z$  (ESI): calcd. for  $\text{C}_{18}\text{H}_{19}\text{O}_2$   $[\text{M}+\text{H}]^+$ : 267.1380; found: 267.1380.

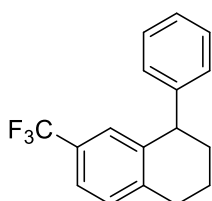

**2kk:** 1-phenyl-7-(trifluoromethyl)-1,2,3,4-tetrahydronaphthalene.

**2kk** was synthesized according to the following method with **1kk** (29.4 mg, 0.1 mmol),  $\text{Re}_2\text{O}_7$  (0.48 mg, 0.001 mmol), and HFIP (0.2 mL). The reaction was stirred at 100 °C for 2 h, then was quenched with 20  $\mu\text{l}$   $\text{Et}_3\text{N}$ , concentrated under vacuum and purified through flash chromatography (100% petroleum ether) to give the desired product as a light yellow oil (12.4 mg, 45% yield).  **$^1\text{H NMR}$**  (400 MHz, Chloroform- $d$ )  $\delta$  7.37 (dd,  $J$  = 8.0 Hz, 2.0 Hz, 1H), 7.30 (dd,  $J$  = 8.2 Hz, 6.5 Hz, 2H), 7.27 – 7.20 (m, 2H), 7.12 (s, 1H), 7.07 (dd,  $J$  = 7.1 Hz, 1.7 Hz, 2H), 4.15 (t,  $J$  = 6.6 Hz, 1H), 2.91(m, ddt,  $J$  = 23.5, 17.3, 8.3 Hz, 2H), 2.22 – 2.14 (m, 1H), 1.96 – 1.85 (m, 2H), 1.83 – 1.70 (m, 1H);  **$^{13}\text{C NMR}$**  (101 MHz, Chloroform- $d$ )  $\delta$  146.6, 141.9 (q,  $J$  = 2.0 Hz), 140.2, 129.6, 128.8, 128.6, 127.1(q,  $J$  = 4.0 Hz), 126.5, 124.3 (q,  $J$  = 223.2 Hz), 122.7 (q,  $J$  = 4.0 Hz), 45.6, 33.1, 29.9, 20.6;  **$^{19}\text{F NMR}$**  (376 MHz,  $\text{CDCl}_3$ )  $\delta$  -62.3 (s); **GC-MS**  $m/z$  (EI): calcd. for  $\text{C}_{17}\text{H}_{15}\text{F}_3$   $[\text{M}]^+$ : 276.11; found: 276.10.

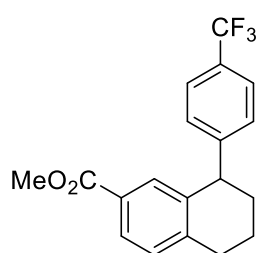

**2II:** methyl-8-(4-(trifluoromethyl)phenyl)-5,6,7,8-tetrahydronaphthalene-2-carboxylate.

**2II** was synthesized according to the following method with **1II** (35.2 mg, 0.1 mmol),  $\text{Re}_2\text{O}_7$  (0.96 mg, 0.002 mmol), and HFIP (0.2 mL). The reaction was stirred at 100 °C for 48 hours, then quenched with 20  $\mu\text{l}$   $\text{Et}_3\text{N}$ , concentrated under vacuum

and purified through flash chromatography (100% petroleum ether to 10 ethyl acetate in petroleum ether) to give the desired product as a colorless oil (28.4 mg, 85% yield).  **$^1\text{H NMR}$**  (400 MHz, Chloroform- $d$ )  $\delta$  7.81 (ddd,  $J = 8.0, 1.9, 0.6$  Hz, 1H), 7.57 – 7.50 (m, 3H), 7.23 (d,  $J = 8.0$  Hz, 1H), 7.18 – 7.16 (m, 2H), 4.24 (t,  $J = 6.3$  Hz, 1H), 3.82 (s, 3H), 3.02 – 2.84 (m, 2H), 2.23 – 2.14 (m, 1H), 1.92 – 1.82 (m, 2H), 1.79 – 1.76 (m, 1H);  **$^{13}\text{C NMR}$**  (101 MHz, Chloroform- $d$ )  $\delta$  167.2, 151.1, 143.4, 138.5, 131.6, 129.5, 129.2, 128.1, 127.5, 125.5 (q,  $J = 4.0$  Hz), 124.3 (q,  $J = 272.7$  Hz), 52.1, 45.3, 33.0, 30.0, 20.2;  **$^{19}\text{F NMR}$**  (376 MHz,  $\text{CDCl}_3$ )  $\delta$  -62.3 (s); **HRMS**  $m/z$  (ESI): calcd. for  $\text{C}_{19}\text{H}_{18}\text{F}_3\text{O}_2$   $[\text{M}+\text{H}]^+$ : 335.1253; found: 335.1256.

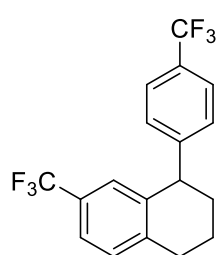

**2mm:** 7-(trifluoromethyl)-1-(4-(trifluoromethyl)phenyl)-1,2,3,4-tetrahydronaphthalene.

**2mm** was synthesized according to the following method with **1mm** (36.2 mg, 0.1 mmol),  $\text{Re}_2\text{O}_7$  (0.96 mg, 0.002 mmol), and HFIP (0.2 mL). The reaction was stirred at 100 °C for 48 hours, then quenched with 20  $\mu\text{l}$   $\text{Et}_3\text{N}$ , concentrated under vacuum and

purified through flash chromatography (100% petroleum ether) to give the desired product as a colorless oil (21.3 mg, 62% yield).  **$^1\text{H NMR}$**  (400 MHz, Chloroform- $d$ )  $\delta$  7.55 (d,  $J = 8.1$  Hz, 2H), 7.39 (dd,  $J = 8.0, 1.9$  Hz, 1H), 7.28 (d,  $J = 8.0$  Hz, 1H), 7.17 (d,  $J = 8.0$  Hz, 2H), 7.09 – 7.04 (m, 1H), 4.23 (t,  $J = 6.5$  Hz, 1H), 3.04 – 2.83 (m, 2H), 2.26 – 2.12 (m, 1H), 1.95 – 1.72 (m, 3H);  **$^{13}\text{C NMR}$**  (101 MHz, Chloroform- $d$ )  $\delta$  150.6, 141.9, 139.1, 129.8, 129.1, 129.0, 128.7, 128.3, 126.9 (q,  $J = 3.0$  Hz), 125.6 (q,  $J = 3.0$  Hz), 125.3, 123.4, 123.1 (q,  $J = 3.0$  Hz), 45.4, 33.0, 29.8, 20.4;  **$^{19}\text{F NMR}$**  (376 MHz,  $\text{CDCl}_3$ )  $\delta$  -62.3 (s); **GC-MS**  $m/z$  (EI): calcd. for  $\text{C}_{18}\text{H}_{14}\text{F}_6$   $[\text{M}]^+$ : 334.10; found: 334.10.

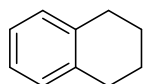

**2nn:** 1,2,3,4-tetrahydronaphthalene. <sup>[16]</sup>

**2nn** was synthesized according to the following method with **1nn** (15 mg, 0.1 mmol),  $\text{Re}_2\text{O}_7$  (0.96 mg, 0.001 mmol), and HFIP (0.2 mL). The reaction was stirred at 100 °C for 48 hours, then quenched with 20  $\mu\text{l}$   $\text{Et}_3\text{N}$ , the yield was determined by analyzing  $^1\text{H NMR}$  of the reaction mixture using Mesitylene as the internal standard.

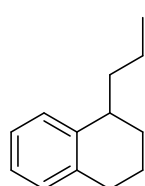

**2oo:** 1-propyl-1,2,3,4-tetrahydronaphthalene. <sup>[9]</sup>

**2oo** was synthesized according to the general synthetic **method C** with **1oo** (19.2 mg, 0.1 mmol),  $\text{Re}_2\text{O}_7 \cdot \text{SiO}_2$  (0.96 mg, 0.0001 mmol), and HFIP (0.2 mL). The reaction was stirred at room temperature for 1 hour, then was quenched with 20  $\mu\text{l}$   $\text{Et}_3\text{N}$ , concentrated under vacuum and purified through flash chromatography (100% petroleum ether) to give the desired product

as a light yellow oil (16.4 mg, 94% yield). **<sup>1</sup>H NMR** (400 MHz, Chloroform-d)  $\delta$  7.26 – 7.22 (m, 1H), 7.18 (dd,  $J$  = 7.4, 1.7 Hz, 1H), 7.14 – 7.10 (m, 2H), 2.84 – 2.79 (m, 3H), 1.92 – 1.81 (m, 2H), 1.74 – 1.38 (m, 6H), 0.96 (t,  $J$  = 7.3 Hz, 3H).

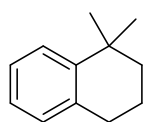

**2pp**: 1,1-dimethyl-1,2,3,4-tetrahydronaphthalene.<sup>[17]</sup>

**2pp** was synthesized according to the general synthetic **method C** with **1pp** (17.8 mg, 0.1 mmol),  $\text{Re}_2\text{O}_7 \cdot \text{SiO}_2$  (0.96 mg, 0.0001 mmol), and HFIP (0.2 mL). The reaction was stirred at room temperature for 1 hour, then quenched with 20  $\mu\text{l}$   $\text{Et}_3\text{N}$ , concentrated under vacuum and purified through flash chromatography (100% petroleum ether) to give the desired product as a light yellow oil (15.2 mg, 95% yield). **<sup>1</sup>H NMR** (400 MHz, Chloroform-d)  $\delta$  7.35 (dd,  $J$  = 7.7, 1.2 Hz, 1H), 7.19 – 7.13 (m, 1H), 7.11 – 7.04 (m, 2H), 2.79 (t,  $J$  = 6.3 Hz, 2H), 1.86 – 1.79 (m, 2H), 1.72 – 1.66 (m, 2H), 1.31 (s, 6H); **<sup>13</sup>C NMR** (101 MHz, Chloroform-d)  $\delta$  145.9, 136.3, 126.8, 125.9, 125.4, 39.5, 34.0, 32.0, 30.9, 19.9.

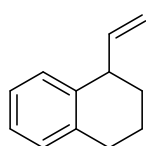

**2qq**: 1-vinyl-1,2,3,4-tetrahydronaphthalene.<sup>[6]</sup>

**2qq** was synthesized according to the general synthetic **method C** with **1qq** (17.6 mg, 0.1 mmol),  $\text{Re}_2\text{O}_7 \cdot \text{SiO}_2$  (0.96 mg, 0.0001 mmol), and HFIP (0.2 mL). The reaction was stirred at room temperature for 1 hour, then quenched with 20  $\mu\text{l}$   $\text{Et}_3\text{N}$ , concentrated under vacuum and purified through flash chromatography (100% petroleum ether) to give the desired product as a colorless oil (13.1 mg, 83% yield). **<sup>1</sup>H NMR** (400 MHz, Chloroform-d)  $\delta$  7.19 – 7.07 (m, 4H), 7.34 (d,  $J$  = 2.1 Hz, 3H), 5.89 (ddd,  $J$  = 16.8, 10.5, 8.1 Hz, 1H), 5.10 (ddd,  $J$  = 10.1, 1.9, 0.7 Hz, 1H), 5.04 (ddd,  $J$  = 17.0, 2.0, 1.1 Hz, 1H), 3.47 (q,  $J$  = 6.9 Hz, 1H), 2.84 – 2.75 (m, 2H), 2.01 – 1.84 (m, 2H), 1.82 – 1.69 (m, 2H).

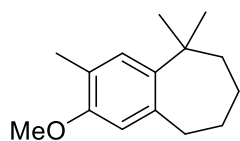

**2rr**: 2-methoxy-3,5,5-trimethyl-6,7,8,9-tetrahydro-5H-benzo[7]annulene.

**2rr** was synthesized according to the general synthetic **method C** with **1rr** (23.6 mg, 0.1 mmol),  $\text{Re}_2\text{O}_7 \cdot \text{SiO}_2$  (0.96 mg, 0.0001 mmol), and HFIP (0.2 mL). The reaction was stirred at room temperature for 1 hour, then quenched with 20  $\mu\text{l}$   $\text{Et}_3\text{N}$ , concentrated under vacuum and purified through flash chromatography (100% petroleum ether) to give the desired product as a light yellow oil (21.4 mg, 98% yield). **<sup>1</sup>H NMR** (400 MHz, Chloroform-d)  $\delta$  7.13 (s, 1H), 6.56 (s, 1H), 3.81 (s, 3H), 2.93 – 2.90 (m, 2H), 2.19 (s, 3H), 1.90 – 1.80 (m, 2H), 1.66 (ddd,  $J$  = 9.3, 5.8, 2.9 Hz, 4H), 1.35 (s, 6H); **<sup>13</sup>C NMR** (101 MHz, Chloroform-d)  $\delta$  155.3, 140.7, 140.3, 129.4, 123.1, 113.4, 55.4, 42.1, 38.7, 37.6, 30.6, 28.5, 26.7, 16.1; **HRMS**  $m/z$  (ESI): calcd. for  $\text{C}_{15}\text{H}_{23}\text{O}$   $[\text{M}+\text{H}]^+$ : 219.1743; found: 219.1745.

## 6 Gram scale experiments

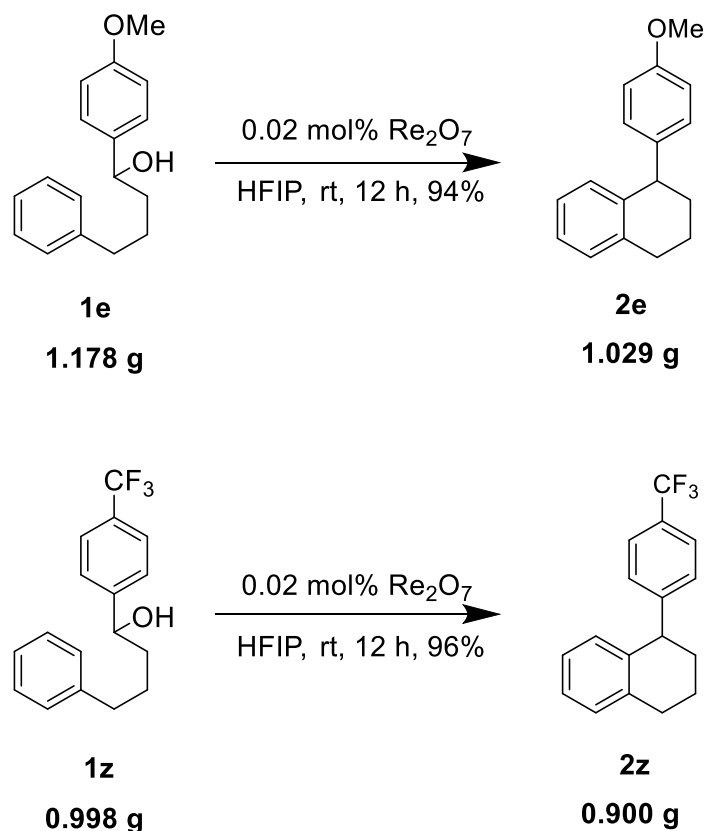

**Figure S15. Gram scale experiments**

Detailed **experimental procedure** for the gram experiments:

General reaction protocol was followed with **1e** (1.178 g, 5 mmol, 1 equiv.), Re<sub>2</sub>O<sub>7</sub> (0.48 mg, 0.001 mmol, 0.0002 equiv.), and HFIP (10.0 mL). The reaction was stirred at room temperature for 12 hours, then quenched with 20  $\mu$ l Et<sub>3</sub>N, concentrated under vacuum followed by purification through flash chromatography (100% petroleum ether) to give the desired product (1.029 g, 94% yield).

General reaction protocol was followed with **1z** (0.998 g, 3.3 mmol, 1 equiv.), Re<sub>2</sub>O<sub>7</sub> (0.32 mg, 0.00066 mmol, 0.0002 equiv.), and HFIP (0.2 mL). The reaction was stirred at room temperature for 12 hours, then quenched with 20  $\mu$ l Et<sub>3</sub>N, concentrated under vacuum followed by purification through flash chromatography (100% petroleum ether) to give the desired product (0.900 g, 96% yield).

## 7 Synthetic applications and spectral data

### 7.1 formal synthesis of Nafenopine.

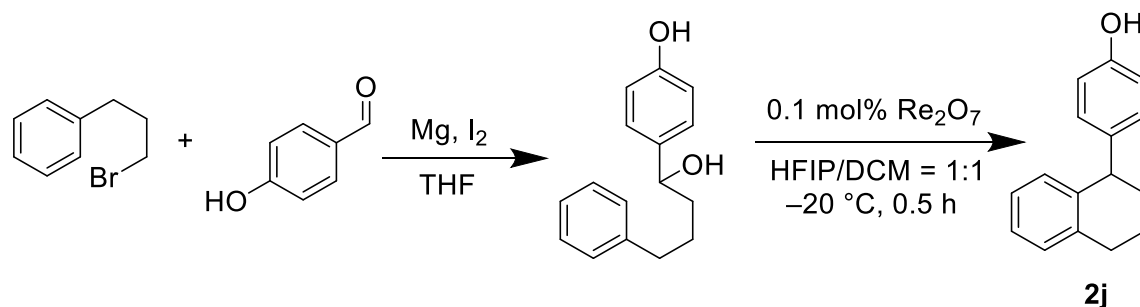

Figure S16. Synthesis of key intermediate **2e** to Nafenopine

### 7.2 formal synthesis of Sertraline.

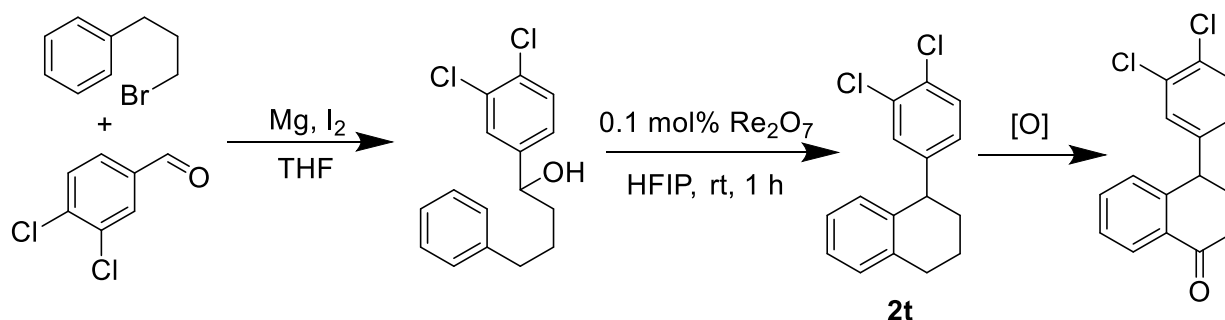

Figure S17. Synthesis of key intermediate **2q** to Sertraline

### 7.3 formal synthesis of **9** (estrogen and androgen receptor).

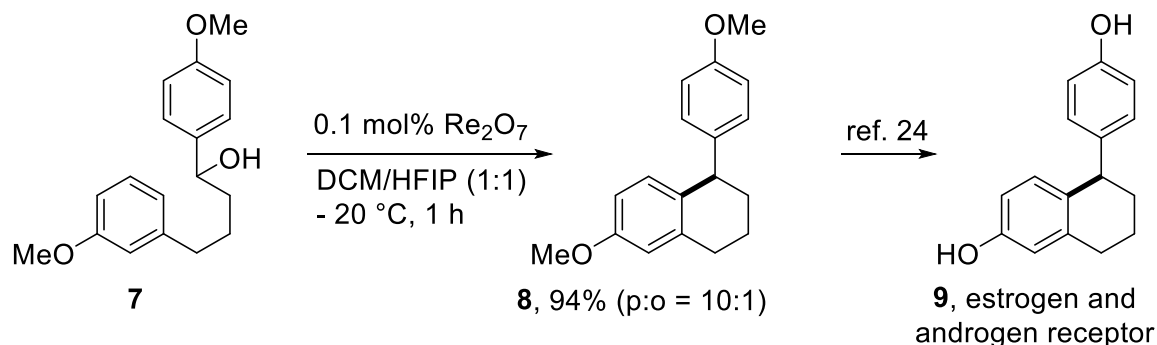

Figure S18. Synthesis of key intermediate **8** to estrogen and androgen receptor **9**

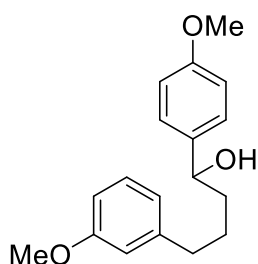

**7**: 4-(3-methoxyphenyl)-1-(4-methoxyphenyl)butan-1-ol<sup>[18]</sup>.

**7** was synthesized according to the general synthetic **method B** as a yellow oil.

**<sup>1</sup>H NMR** (400 MHz, Chloroform-*d*)  $\delta$  7.32 – 7.15 (m, 3H), 6.92 – 6.86 (m, 2H), 6.76 – 6.68 (m, 3H), 4.65 (d,  $J = 5.0$  Hz, 1H), 3.82 (s, 3H), 3.80 (s, 3H), 2.62 (dd,  $J = 8.4, 6.3$  Hz, 2H), 1.94 – 1.71 (m, 4H); **<sup>13</sup>C NMR** (101 MHz, Chloroform-*d*)  $\delta$

159.6, 159.0, 144.0, 136.9, 129.2, 127.2, 120.9, 114.2, 113.8, 111.0, 74.1, 55.3, 55.1, 38.5, 35.8, 27.6.

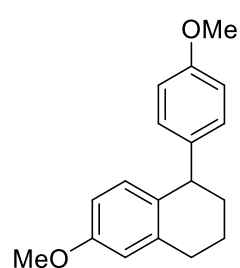

**8**: 6-methoxy-1-(4-methoxyphenyl)-1,2,3,4-tetrahydronaphthalene<sup>[19]</sup>.

**8** was synthesized according to the following method with **7** (28.6 mg, 0.1 mmol),  $\text{Re}_2\text{O}_7 \cdot \text{SiO}_2$  (0.96 mg, 0.0001 mmol), and HFIP : DCM = 1:1 (0.2 mL). The reaction was stirred at  $-20^\circ\text{C}$  for 1 hour, then quenched with 20  $\mu\text{l}$   $\text{Et}_3\text{N}$ , concentrated under vacuum and purified through flash chromatography (100% petroleum ether) to give the desired product as a light yellow oil (25.2 mg, 94% yield). **<sup>1</sup>H NMR** (400 MHz, Chloroform- $d$ )  $\delta$  7.04 – 6.98 (m, 2H), 6.85 – 6.79 (m, 2H), 6.76 (d,  $J$  = 8.4 Hz, 1H), 6.66 (d,  $J$  = 2.7 Hz, 1H), 6.61 (dd,  $J$  = 8.5, 2.8 Hz, 1H), 4.00 (t,  $J$  = 6.7 Hz, 1H), 3.79 (s, 3H), 3.78 (s, 3H), 2.91 – 2.77 (m, 2H), 2.11 (s, 1H), 1.91 – 1.68 (m, 3H); **<sup>13</sup>C NMR** (101 MHz, Chloroform- $d$ )  $\delta$  157.9, 157.7, 138.8, 132.1, 131.2, 129.7, 113.7, 113.4, 112.2, 55.4, 55.3, 44.2, 33.7, 30.3, 21.1.

#### 7.4 total synthetic of an isoCA-4 analogue.

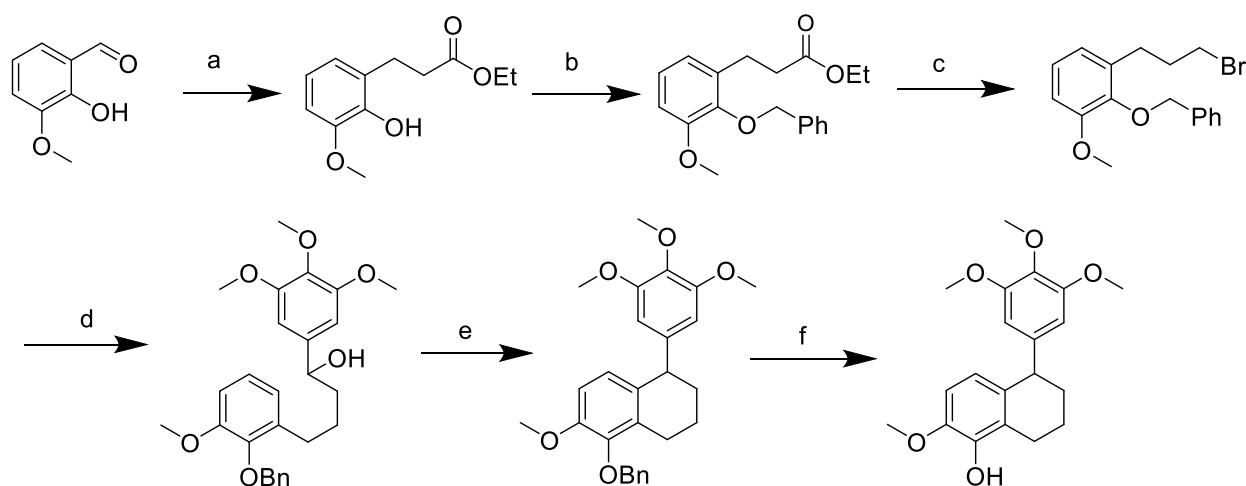

Reaction Condition:a)

(1) 2-Ethoxy-2-oxoethylidene)triphenylphosphorane, DCM, rt, 12 h, (2) Pd/C,  $\text{H}_2$ , MeOH, 12 h, 2 steps, 86%.b) (bromomethyl)benzene, MeCN,  $\text{K}_2\text{CO}_3$ , reflux, 36 h, 95%. c) (1)  $\text{LiAlH}_4$ , THF,  $0^\circ\text{C}$  to rt, 1 h.(2) NBS,  $\text{PPh}_3$ , DCM,  $0^\circ\text{C}$  to rt, 2 h, 2 steps, 86%. d) Mg,  $\text{I}_2$ , THF, then 3,4,5-trimethoxybenzaldehyde, THF,  $0^\circ\text{C}$  to rt, 1 h, 36%.e) 0.001 equiv  $\text{Re}_2\text{O}_7$ , HFIP, rt, 1 h, 96%. f) Pd/C,  $\text{H}_2$ , MeOH, rt, 12 h, 95%.

**Figure 19. Total synthesis of an isoCA-4 analogue**

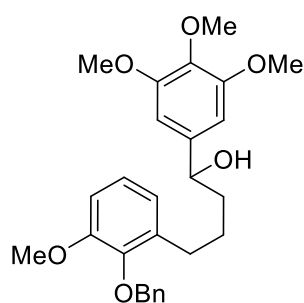

**10:** 4-(2-(benzyloxy)-3-methoxyphenyl)-1-(3,4,5-trimethoxyphenyl)butan-1-ol. Light yellow oil. **<sup>1</sup>H NMR** (400 MHz, Chloroform-d)  $\delta$  7.45 (d,  $J$  = 7.3 Hz, 2H), 7.37 (t,  $J$  = 7.3 Hz, 2H), 7.32 (d,  $J$  = 7.2 Hz, 1H), 6.99 (t,  $J$  = 7.9 Hz, 1H), 6.80 (d,  $J$  = 8.0 Hz, 1H), 6.75 (d,  $J$  = 7.6 Hz, 1H), 6.51 (s, 2H), 4.97 (s, 2H), 4.57 (m, 1H), 3.87 (s, 3H), 3.83 (s, 6H), 3.82 (s, 3H), 2.63 (t,  $J$  = 7.0 Hz, 2H), 1.81 – 1.64 (m, 4H); **<sup>13</sup>C NMR** (101 MHz, Chloroform-d)  $\delta$  153.3, 152.9, 140.8, 138.2, 136.4, 128.4, 128.1, 127.9, 124.0, 122.0, 110.3, 102.9, 74.8, 74.6, 60.9, 56.2, 55.8, 38.8, 29.8, 26.9; **HRMS**  $m/z$  (ESI): calcd. for C<sub>27</sub>H<sub>32</sub>NaO<sub>6</sub> [M+Na]<sup>+</sup>: 475.2901; found: 475.2917.

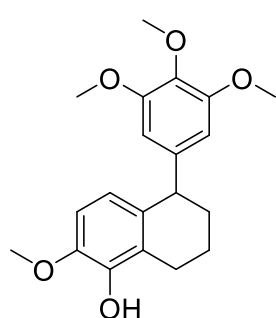

**11:** 5-(benzyloxy)-6-methoxy-1-(3,4,5-trimethoxyphenyl)-1,2,3,4-tetrahydronaphthalene.

General reaction protocol was followed with **9** (45.35 mg, 0.1 mmol), Re<sub>2</sub>O<sub>7</sub> (0.97 mg, 0.0001 mmol), and HFIP (0.2 mL). The reaction was stirred at at 100 °C for 48 hours, then quenched with Et<sub>3</sub>N, concentrated under vacuum and purified through flash chromatography (100% petroleum ether to 20% ethyl acetate in petroleum ether) to give the desired product as a light yellow oil (41.2 mg, 96% yield). **<sup>1</sup>H NMR** (400 MHz, Chloroform-d)  $\delta$  7.52 – 7.48 (m, 2H), 7.42 – 7.30 (m, 3H), 6.71 (d,  $J$  = 8.6 Hz, 1H), 6.62 (d,  $J$  = 8.6 Hz, 1H), 6.29 (s, 2H), 5.08 (d,  $J$  = 11.1 Hz, 1H), 4.98 (d,  $J$  = 11.0 Hz, 1H), 3.98 (t,  $J$  = 7.2 Hz, 1H), 3.86 (s, 3H), 3.84 (s, 3H), 3.78 (s, 6H), 2.81 (m, 2H), 2.10 – 2.03 (m, 1H), 1.87 – 1.77 (m, 2H), 1.72 – 1.63 (m, 1H); **<sup>13</sup>C NMR** (101 MHz, Chloroform-d)  $\delta$  153.0, 150.7, 145.1, 143.5, 138.3, 136.2, 132.7, 132.3, 128.5, 128.2, 128.0, 125.7, 110.2, 106.0, 74.1, 61.0, 56.2, 55.9, 45.7, 33.0, 24.2, 20.7; **GC-MS**  $m/z$  (EI): calcd. for C<sub>27</sub>H<sub>30</sub>O<sub>5</sub> [M]<sup>+</sup>: 434.21; found: 434.20.

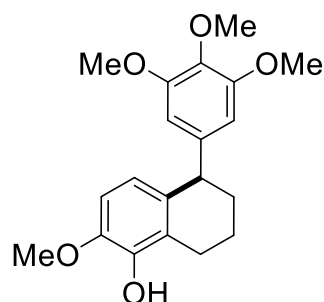

**isoCA-4 analogue (5):** (R)-2-methoxy-5-(3,4,5-trimethoxyphenyl)-5,6,7,8-tetrahydronaphthalen-1-ol.<sup>[20]</sup>

**<sup>1</sup>H NMR** (400 MHz, Chloroform-d)  $\delta$  6.65 (d,  $J$  = 8.5 Hz, 1H), 6.41 (d,  $J$  = 8.4 Hz, 1H), 6.34 (s, 2H), 5.72 (s, 1H), 3.99 (dd,  $J$  = 7.9, 5.4 Hz, 1H), 3.88 (s, 3H), 3.86 (s, 3H), 3.81 (s, 6H), 2.83 (dt,  $J$  = 19.9, 6.5 Hz, 2H), 2.20 – 2.02 (m, 1H), 2.02 – 1.71 (m, 4H).



## 8 Catalyst Recovery Experiment

### 8.1 Experimental details I

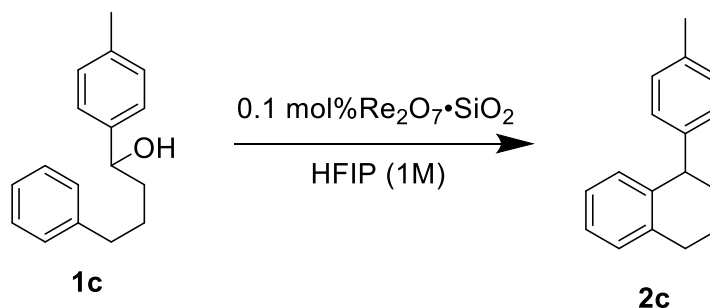

**Figure 20. Catalyst Recovery Experiment I**

**Initial experiment:** Select **1c** as the substrate for the catalyst recycling experiment. To a solution of the **1c** (0.608 g, 2.69 mmol) in HFIP (2.7 mL) was added  $\text{Re}_2\text{O}_7 \cdot \text{SiO}_2$  (13.5 mg, 10% w/w, 0.001 equiv). The reaction mixture was sealed in the reaction tube and stirred at room temperature for 5 minutes. After monitoring the reaction, it was found that the cyclic product **2c** was the only product, and no starting material remained in the system. Then the reaction was not quenched, and the solvent was removed under vacuum. The crude product was filtered through a simple small silica gel column with a small amount of silica gel. The catalyst catalyzed the Friedel-Crafts dehydration alkylation of **1c** for the first time with a yield of 99%. The catalyst in the reaction was supported on a small amount of silica gel on the small silica gel column.

**First recycling:** The catalyst recovered for the first time was added to the solution of the **1c** (0.589 g, 2.60 mmol) in HFIP (2.6 ml), the reaction mixture was sealed in the reaction tube and stirred at room temperature for 5 minutes. The cyclic product **2c** was found to be the only product by monitoring the reaction, and there was no remaining raw material in the system. The reaction results were similar to the first catalytic cycle of the catalyst. The yield of the catalyst for the second catalyzed Friedel-Crafts dehydration alkylation of **1c** was 96%, and the catalyst recovered for the second time was obtained by the same method.

**Second recycling:** The catalyst recovered for the second time was added to the solution of the **1c** (0.597 g, 2.64 mmol) in HFIP (2.7 ml), the reaction mixture was sealed in the reaction tube and stirred at room temperature for 5 minutes. The cyclic product **2c** was found to be the only product by monitoring the reaction, and there was no remaining raw material in the system. The third reaction results were the same as the first two catalytic cycles of the catalyst. The yield of the catalyst for the third Friedel-Crafts alkylation dehydration alkylation of **1c** was 99%, and the catalyst recovered for the third time was obtained by the same method.

**Third recycling:** The catalyst recovered for the third time was added to the solution of the **1c** (0.608 g, 2.69 mmol) in HFIP (2.7 ml), the reaction mixture was sealed in the reaction tube and stirred at room temperature for 5 minutes. After monitoring the reaction, it was found that there was basically no product

in the system. The system was stirred at room temperature for 41 hours, and a large amount of raw materials remained in the system. **This results indicated that  $\text{Re}_2\text{O}_7$  was active for at least three cycles of reactions, but gradually lost catalytic efficiency.**

## 8.2 Experimental details II

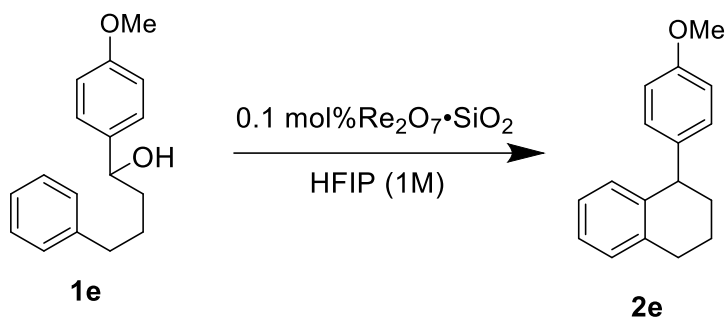

**Figure 21. Catalyst Recovery Experiment II**

Select **1e** as the substrate for the catalyst recycling experiment. To a solution of the **1e** (0.604 g, 2.36 mmol) in HFIP (2.4 mL) was added  $\text{Re}_2\text{O}_7 \cdot \text{SiO}_2$  (11.5 mg, 10% w/w, 0.001 equiv). The reaction mixture was sealed in the reaction tube and stirred at room temperature for 5 minutes. After monitoring the reaction, it was found that the cyclic product **2e** was the only product, and no starting material remained in the system. Then the reaction was not quenched, and the solvent was not removed under vacuum. The reaction system was directly filtered with a simple column with only cotton, and the residual material on the cotton was used as the recovered catalyst.

The residues from the cotton was added to the solution of the **1e** (0.615 g, 2.40 mmol) in HFIP (2.4 ml), the reaction mixture was sealed in the reaction tube and stirred at room temperature for 5 minutes. After monitoring the reaction, it was found that there was basically no product in the system. **This results indicated that  $\text{Re}_2\text{O}_7$  was dissolved in the highly polar HFIP, and pointed to a homogeneous catalysis.**

## 9 Control Experiments

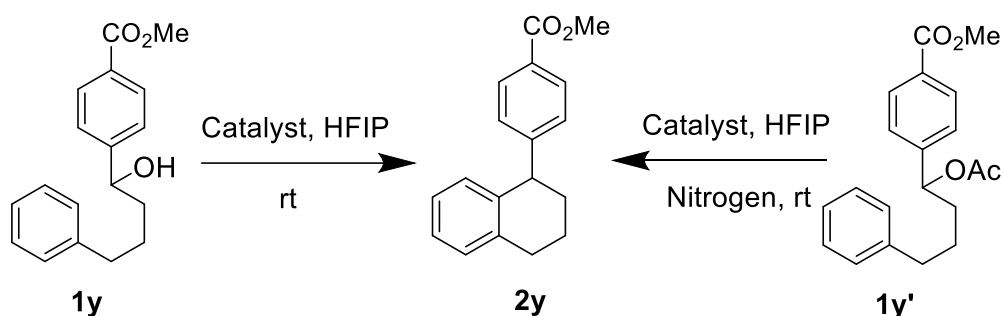

0.1 mol%  $\text{Re}_2\text{O}_7$  (98%, 4h)

0.2 mol%  $\text{HReO}_4$  (97%, 2.5h)

0.2 mol%  $\text{TfOH}$  (98%, 2.5h)

$\text{p}K_{\text{a}}$  of  $\text{HReO}_4$  : -1.25  
 $\text{p}K_{\text{a}}$  of  $\text{TfOH}$  : -14

0.1 mol%  $\text{Re}_2\text{O}_7$  (trace, 4h)

0.2 mol%  $\text{HReO}_4$  (10%, 2.5h)

0.2 mol%  $\text{TfOH}$  (94%, 2.5h)

**Figure 22. Control experiment details**

**1y'** was chosen as the substrate to verify the possible mechanism in the Rhenium oxide catalytic system. **1y'** was placed into a Schlenk reaction tube, then ultra-dry toluene was used to remove the possible residual water in the substrate under a vacuum pump, then store the system in a nitrogen environment, add Hexafluoroisopropanol ( it was dry and kept under nitrogen), and 0.1 mol% of  $\text{Re}_2\text{O}_7$  was added as a catalyst, the entire reaction system was initially guaranteed to be under anhydrous conditions, and the reaction was carried out at room temperature for four hours, then the reaction was quenched with triethylamine. Using *p*-nitrotoluene as the internal standard, the yield of **2y** was calculated by NMR analysis. Using the same method, in an anhydrous and oxygen-free system, the yield of **2y** was determined when 0.2 mol% perrhenic acid ( $\text{HReO}_3$ ) or 0.2 mol% of trifluoromethanesulfonic acid ( $\text{TfOH}$ ) was used as catalysts.

**Note:**  $\text{HReO}_3$  was used as a 10.0 mM solution in HFIP,  $\text{TfOH}$  was used as a 5.0 mM solution in HFIP, if a 5.0 mM solution of  $\text{TfOH}$  in  $\text{Et}_2\text{O}$  was used, catalytic efficiency was much lower.

## 10 Kinetic Study

### 10.1 Hammett equation

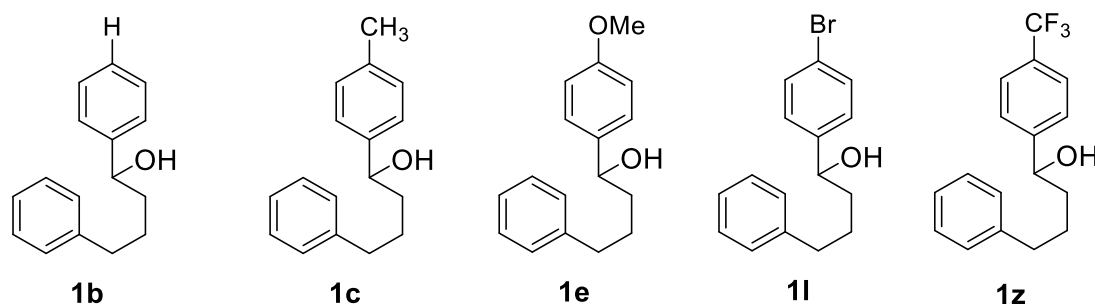

A mixture two different *p*-substituted **1** (**1b** and **1c**; **1b** and **1e**; **1b** and **1l**; **1b** and **1z**, 0.25 mmol each) was dissolved in HFIP (1.0 mL), and it was cooled to 0 °C before  $\text{Re}_2\text{O}_7 \cdot \text{SiO}_2$  (0.000125 mmol, 0.0005 equiv) was added. The reaction was stirred at room temperature for 5 minute, 10 minutes, or 15 minutes, then quenched with 20  $\mu\text{l}$   $\text{Et}_3\text{N}$ , Then solvent was removed under vacuum and add *p*-nitrotoluene as internal standard analyzed by  $^1\text{H}$  NMR. The  $k_X/k_H$  data was calculated based on the reduced molar amount of **1** and the results were summarized as follows equation:

$$\frac{K_X}{K_H} = \frac{\frac{C_{X0} - C_{Xt}}{t}}{\frac{C_{H0} - C_{Ht}}{t}} = \frac{\frac{m_{X0} - m_{Xt}}{V}}{\frac{m_{H0} - m_{Ht}}{V}} = \frac{m_{X0} - m_{Xt}}{m_{H0} - m_{Ht}}$$

Each group of experiments was repeated three times, and the average value of the three times was taken as the final  $k_X/k_H$  data.

**Table S2. the datas of  $k_X/k_H$**

| X             | $\sigma$ | $k_X/k_H(1)$ | $k_X/k_H(2)$ | $k_X/k_H(3)$ | Average |
|---------------|----------|--------------|--------------|--------------|---------|
| OMe           | -0.27    | 3.592        | 4.079        | 3.5457       | 3.739   |
| $\text{CH}_3$ | -0.17    | 2.232        | 1.254        | 2.37         | 1.952   |
| H             | 0.0      | 1            | 1            | 1            | 1       |
| Br            | 0.23     | 0.2822       | 0.3854       | 0.3384       | 0.335   |
| $\text{CF}_3$ | 0.54     | 0.0451       | 0.0670       | 0.0568       | 0.056   |

**Table S3. the datas of  $\log(k_X/k_H)$  and  $\sigma_p$** 

| entry | $k_X/k_H$ | $\rho$ -substituted X | $\sigma_p^a$ | $\log(k_X/k_H)$ |
|-------|-----------|-----------------------|--------------|-----------------|
| 1     | 3.739     | OMe                   | -0.27        | 0.5728          |
| 2     | 1.852     | CH <sub>3</sub>       | -0.17        | 0.2676          |
| 3     | 1         | H                     | 0.0          | 0.0000          |
| 4     | 0.335     | Br                    | 0.23         | -0.4750         |
| 5     | 0.056     | CF <sub>3</sub>       | 0.54         | -1.2518         |

<sup>a</sup>Data from: Hansch, Corwin.; Leo, A.; Taft R. W. A survey of Hammett substituent constants and resonance and field parameters. *Chem. Rev.* 1991, **91**, 165–195.

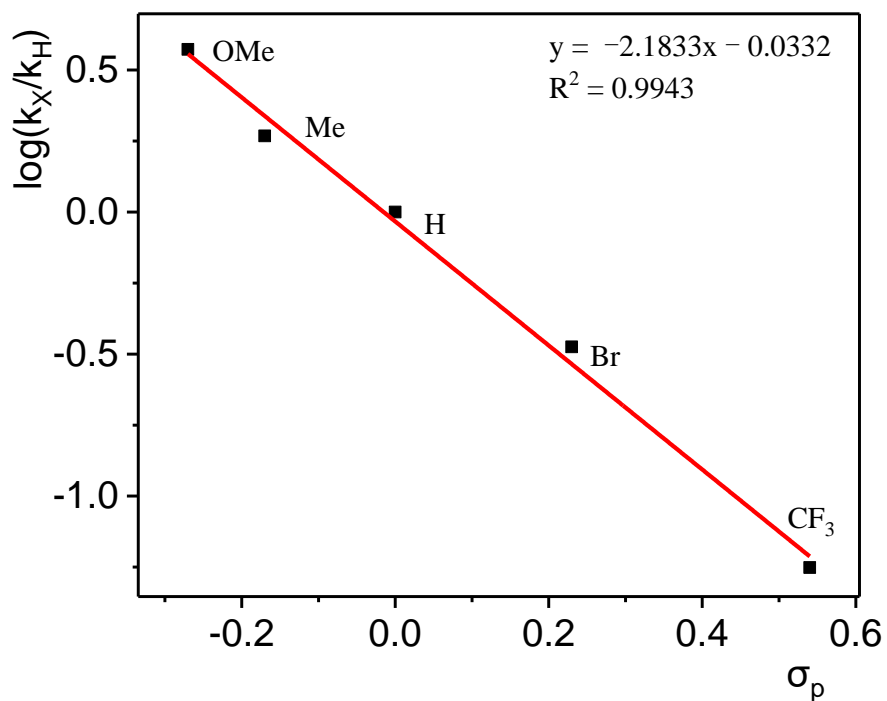**Figure 23. Hammett plots of  $\log(k_X/k_H)$  vs  $\sigma_p$**

**Table S4. the datas of  $\log(k_X/k_H)$  and  $\sigma_p^+$** 

| entry | $k_X/k_H$ | $p$ -substituted X | $\sigma_p^{+a}$ | $\log(k_X/k_H)$ |
|-------|-----------|--------------------|-----------------|-----------------|
| 1     | 3.739     | OMe                | -0.78           | 0.5728          |
| 2     | 1.852     | CH <sub>3</sub>    | -0.31           | 0.2676          |
| 3     | 1         | H                  | 0.0             | 0.0000          |
| 4     | 0.335     | Br                 | 0.15            | -0.4750         |
| 5     | 0.056     | CF <sub>3</sub>    | 0.61            | -1.2518         |

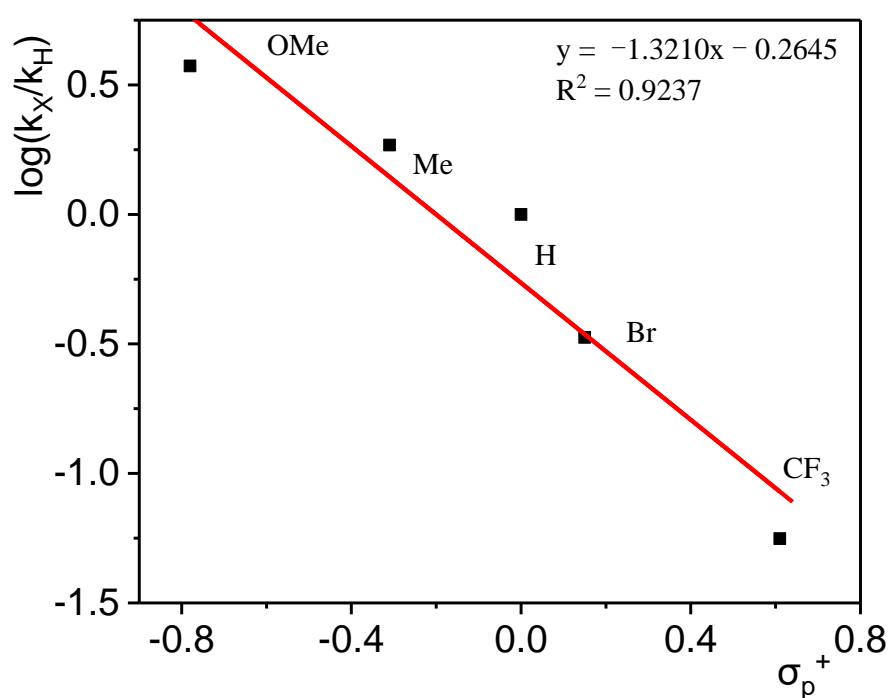**Figure 24. Hammett plots of  $\log(k_X/k_H)$  vs  $\sigma_p^+$**

## 10.2 Reaction rate constant determination

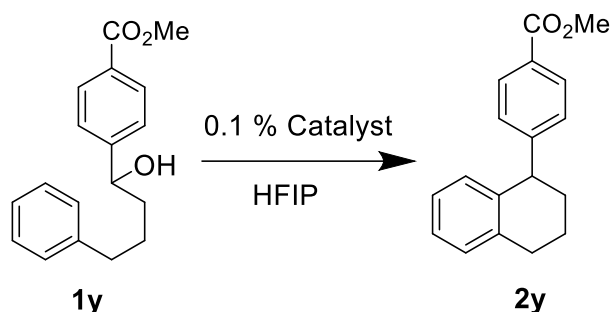

The activation energy of the reaction system with 0.1 mol% of the catalyst was measured with **1y** as the substrate. **1y** (0.25 mmol) and *p*-nitrotoluene (certain amount) was dissolved in HFIP (0.25 mL), and the reaction was heated to 30 °C before  $\text{Re}_2\text{O}_7 \cdot \text{SiO}_2$  (0.00025 mmol, 0.001 equiv) was added. Continuously monitor the reaction, small aliquots were at different times and quenched with triethylamine, determination of the residual concentration of **1y** in the system was made by  $^1\text{H}$  NMR (*p*-nitrotoluene as an internal standard). Then the natural logarithm of the ratio of the initial concentration of **1y** to the concentration at a certain time was plotted against the reaction time, through which the *k* value can be obtained. the reaction rate constants at 35 °C, 40 °C, 45 °C, and 50 °C of the 0.1 mol% Rhenium catalyst system were measured in the same way, and the same method was used to measure the reaction rate constants at 30 °C, 40 °C, 45 °C, and 50 °C of the 0.1 mol% Trifluoromethanesulfonic acid-catalyzed reaction.

**Note:**  $\text{HReO}_3$  was used as a 10.0 mM solution in HFIP, TfOH was used as a 5.0 mM solution in HFIP, if a 5.0 mM solution of TfOH in  $\text{Et}_2\text{O}$  was used, catalytic efficiency was much lower.

**Table S5. Data of  $\ln([C]_0/[C]_t)$  and t catalyzed by Rhenium oxide at 30 °C**

| entry | t (h) | $[C]_t$ | $[C]_0/[C]_t$ | $\ln([C]_0/[C]_t)$ |
|-------|-------|---------|---------------|--------------------|
| 1     | 0     | 0.46556 | 1.0000        | 0.0000             |
| 2     | 0.5   | 0.15896 | 2.9288        | 1.0746             |
| 3     | 1     | 0.09856 | 4.7236        | 1.5526             |
| 4     | 2     | 0.05087 | 9.1520        | 2.2140             |
| 5     | 4     | 0.00954 | 48.8008       | 3.8877             |

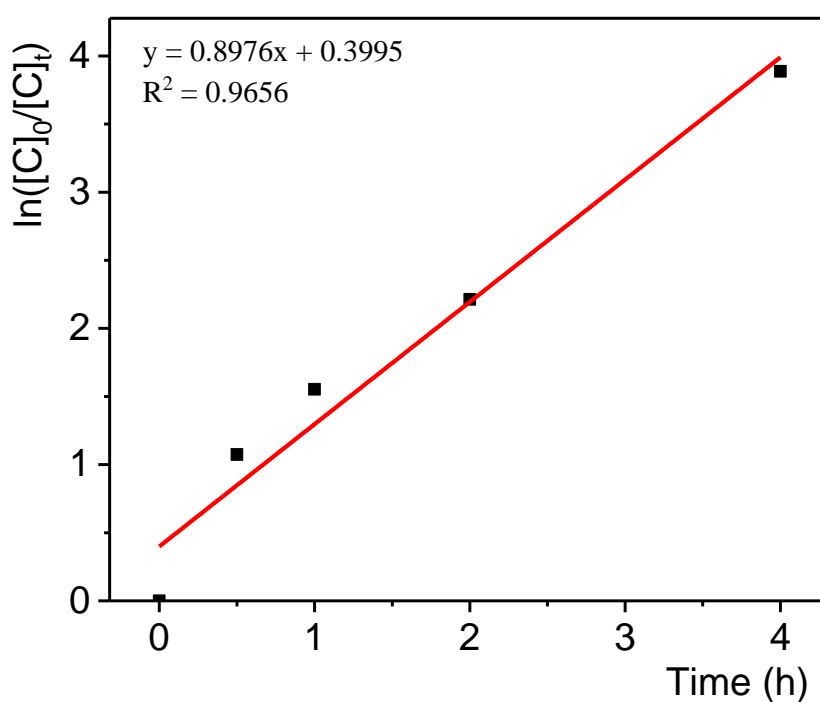

**Figure 25. Rate constants of systems catalyzed by Rhenium oxide at 30 °C**



**Table S6. Data of  $\ln([C]_0/[C]_t)$  and  $t$  catalyzed by Trifluoromethanesulfonic acid at 30 °C**

| entry | t (h) | $[C]_t$ | $[C]_0/[C]_t$ | $\ln([C]_0/[C]_t)$ |
|-------|-------|---------|---------------|--------------------|
| 1     | 0     | 0.47675 | 1.0000        | 0.0000             |
| 2     | 0.5   | 0.06166 | 7.7319        | 2.0454             |
| 3     | 1     | 0.01822 | 26.1663       | 3.2645             |

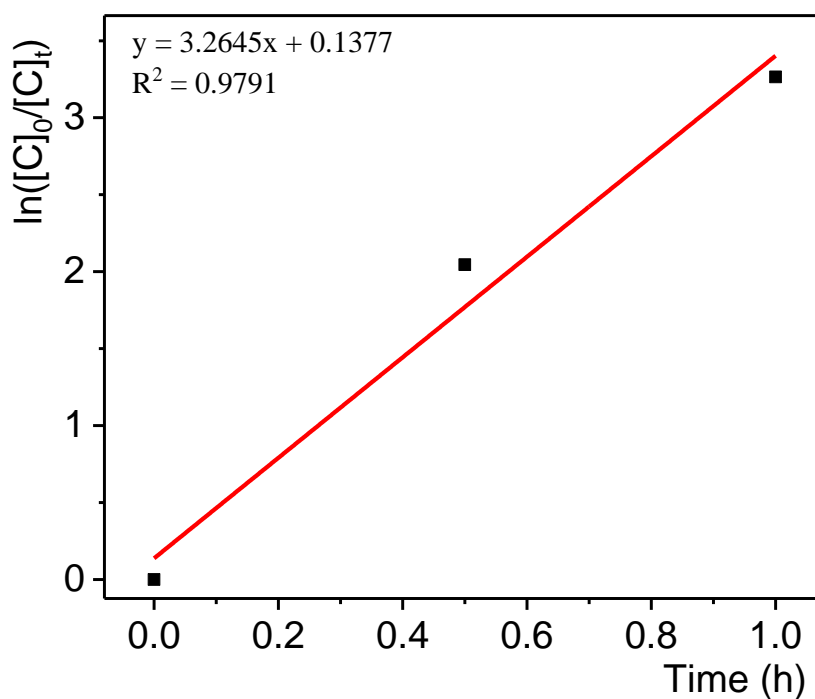

**Figure 26. Rate constants of systems catalyzed by Trifluoromethanesulfonic acid at 30 °C**

**Table S7. Data of  $\ln([C]_0/[C]_t)$  and t catalyzed by Rhenium oxide at 35 °C**

| entry | t (h)  | $[C]_t$ | $[C]_0/[C]_t$ | $\ln([C]_0/[C]_t)$ |
|-------|--------|---------|---------------|--------------------|
| 1     | 0.0000 | 0.4679  | 1.0000        | 0.0000             |
| 2     | 0.1670 | 0.2685  | 1.7426        | 0.5554             |
| 3     | 0.5000 | 0.1611  | 2.9044        | 1.0662             |
| 4     | 1.0000 | 0.0917  | 5.1025        | 1.6297             |

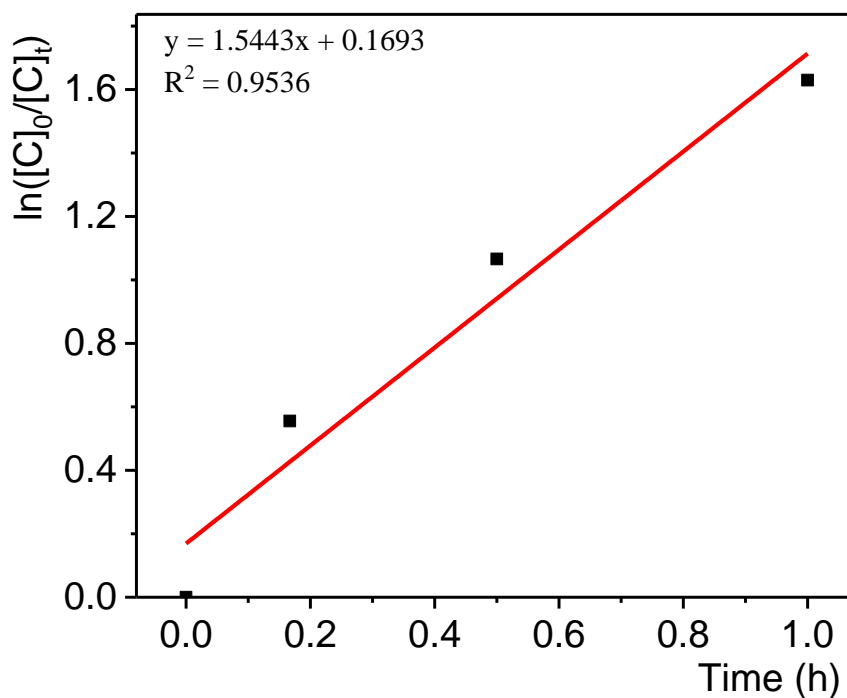

**Figure 27. Rate constants of systems catalyzed by Rhenium oxide at 35 °C**

**Table S8. Data of  $\ln([C]_0/[C]_t)$  and t catalyzed by Rhenium oxide at 40 °C**

| entry | t (h)  | $[C]_t$ | $[C]_0/[C]_t$ | $\ln([C]_0/[C]_t)$ |
|-------|--------|---------|---------------|--------------------|
| 1     | 0.0000 | 0.4961  | 1.0000        | 0.0000             |
| 2     | 0.2500 | 0.1913  | 2.5933        | 0.9529             |
| 3     | 0.7500 | 0.0466  | 10.6459       | 2.3652             |
| 4     | 1.2500 | 0.0264  | 18.7917       | 2.9334             |
| 5     | 1.7500 | 0.0088  | 56.3750       | 4.0320             |

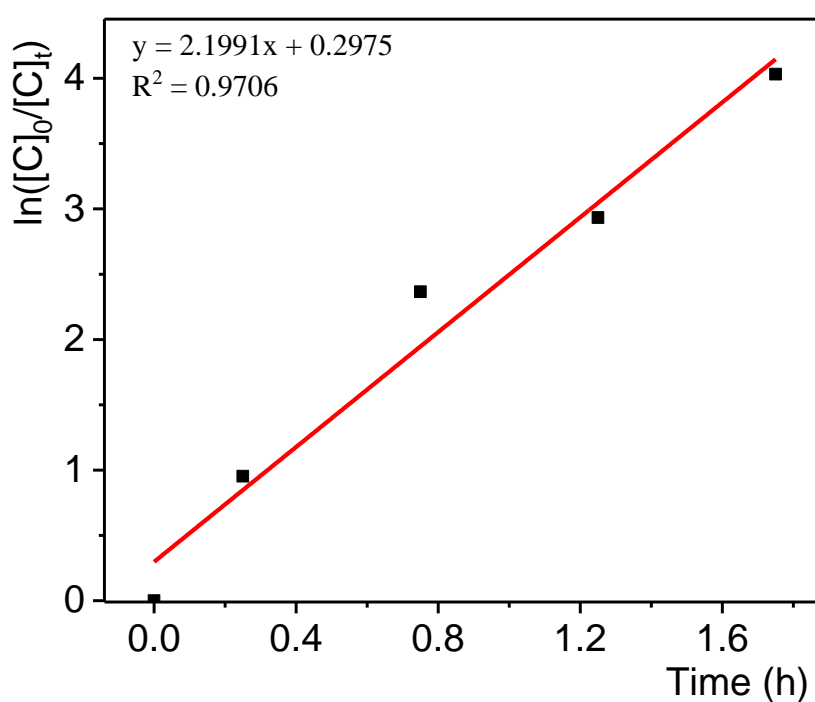

**Figure 28. Rate constants of systems catalyzed by Rhenium oxide at 40 °C**

**Table S9. Data of  $\ln([C]_0/[C]_t)$  and  $t$  catalyzed by Trifluoromethanesulfonic acid at 40 °C**

| entry | t (h)  | $[C]_t$ | $[C]_0/[C]_t$ | $\ln([C]_0/[C]_t)$ |
|-------|--------|---------|---------------|--------------------|
| 1     | 0.0000 | 0.4545  | 1.0000        | 0.0000             |
| 2     | 0.2500 | 0.0879  | 5.1703        | 1.6429             |
| 3     | 0.7500 | 0.0113  | 40.0767       | 3.6908             |

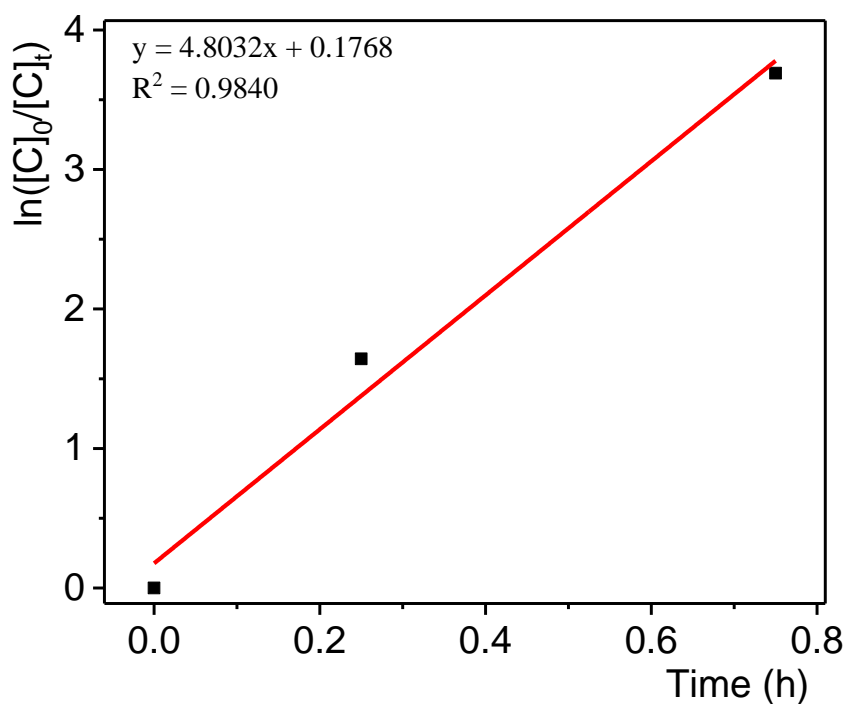

**Figure 29. Rate constants of systems catalyzed by Trifluoromethanesulfonic acid at 40 °C**

**Table S10. Data of  $\ln([C]_0/[C]_t)$  and t catalyzed by Rhenium oxide at 45 °C**

| entry | t (h)  | $[C]_t$ | $[C]_0/[C]_t$ | $\ln([C]_0/[C]_t)$ |
|-------|--------|---------|---------------|--------------------|
| 1     | 0.0000 | 0.4802  | 1.0000        | 0.0000             |
| 2     | 0.0830 | 0.2551  | 1.8824        | 0.6325             |
| 3     | 0.2500 | 0.1206  | 3.9818        | 1.3817             |
| 4     | 0.4170 | 0.0729  | 6.5871        | 1.8851             |
| 5     | 0.5000 | 0.0566  | 8.4841        | 2.1382             |

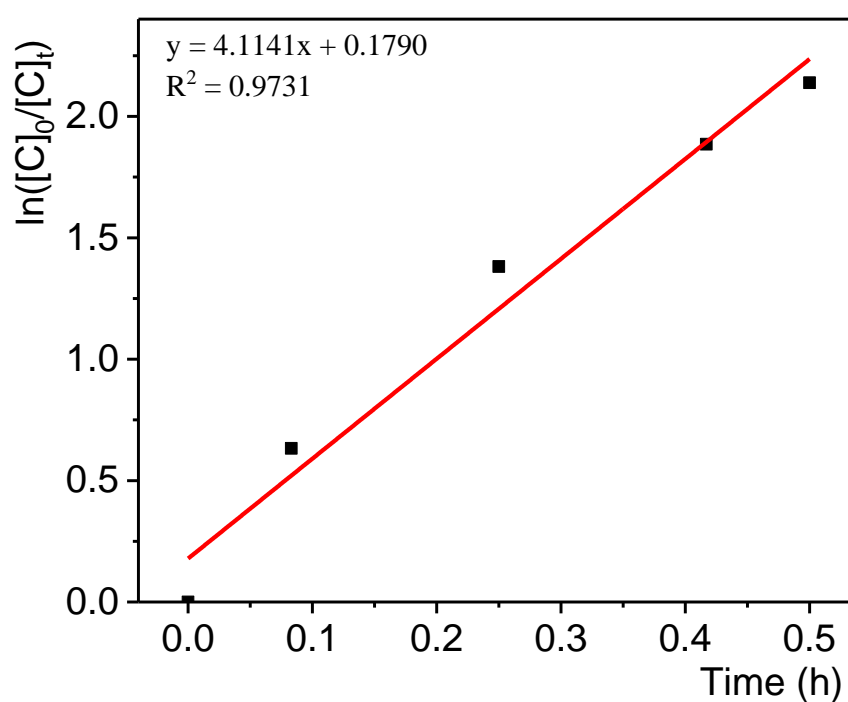

**Figure 30. Rate constants of systems catalyzed by Rhenium oxide at 45 °C**

**Table S11. Data of  $\ln([C]_0/[C]_t)$  and  $t$  catalyzed by Trifluoromethanesulfonic acid at 45 °C**

| entry | t (h)  | $[C]_t$ | $[C]_0/[C]_t$ | $\ln([C]_0/[C]_t)$ |
|-------|--------|---------|---------------|--------------------|
| 1     | 0.0000 | 0.4744  | 1.0000        | 0.0000             |
| 2     | 0.0830 | 0.1883  | 2.5194        | 0.9240             |
| 3     | 0.2500 | 0.0491  | 9.6619        | 2.2682             |
| 4     | 0.4170 | 0.0211  | 22.4834       | 3.1128             |

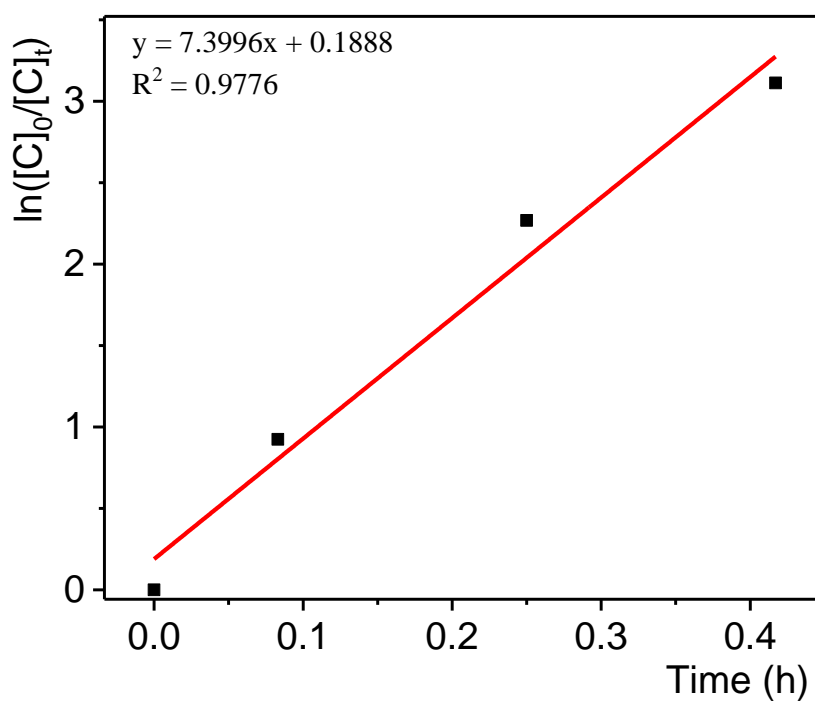**Figure 31. Rate constants of systems catalyzed by Trifluoromethanesulfonic acid at 45 °C**

**Table S12. Data of  $\ln([C]_0/[C]_t)$  and t catalyzed by Rhenium oxide at 50 °C**

| entry | t (h)  | $[C]_t$ | $[C]_0/[C]_t$ | $\ln([C]_0/[C]_t)$ |
|-------|--------|---------|---------------|--------------------|
| 1     | 0.0000 | 0.4960  | 1.0000        | 0.0000             |
| 2     | 0.0830 | 0.1815  | 2.7328        | 1.0053             |
| t3    | 0.2500 | 0.0928  | 5.0168        | 1.6128             |
| 4     | 0.4170 | 0.0544  | 8.5581        | 2.1469             |
| 5     | 0.5830 | 0.0202  | 23.0475       | 3.1376             |

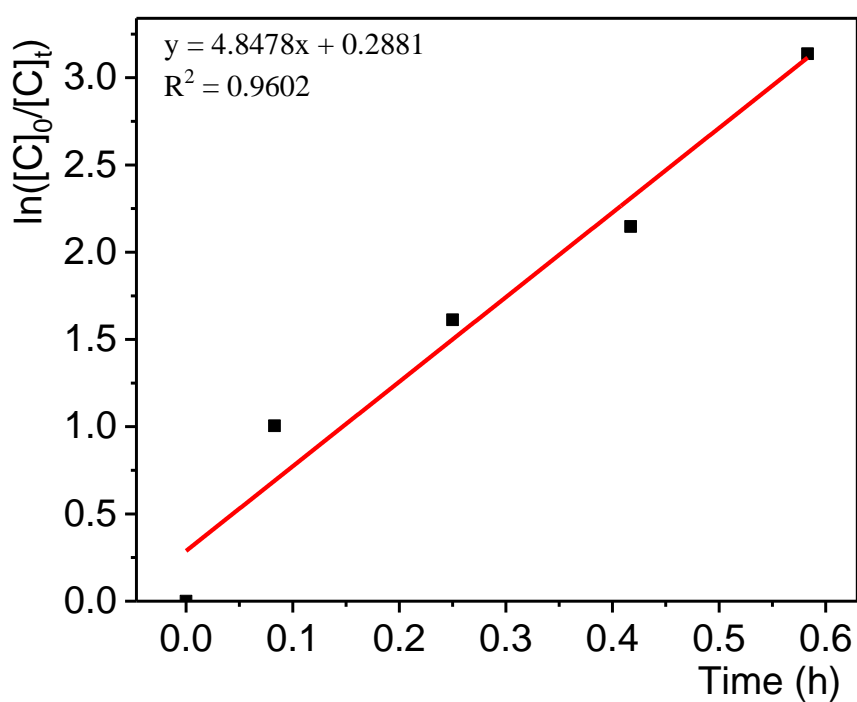

**Figure 32. Rate constants of systems catalyzed by Rhenium oxide at 50 °C**

**Table S13. Data of  $\ln([C]_0/[C]_t)$  and  $t$  catalyzed by Trifluoromethanesulfonic acid at 50 °C**

| entry | t (h)  | $[C]_t$ | $[C]_0/[C]_t$ | $\ln([C]_0/[C]_t)$ |
|-------|--------|---------|---------------|--------------------|
| 1     | 0.0000 | 0.4821  | 1.0000        | 0.0000             |
| 2     | 0.0830 | 0.0752  | 6.4109        | 1.8580             |
| t3    | 0.2500 | 0.0217  | 22.2166       | 3.1008             |

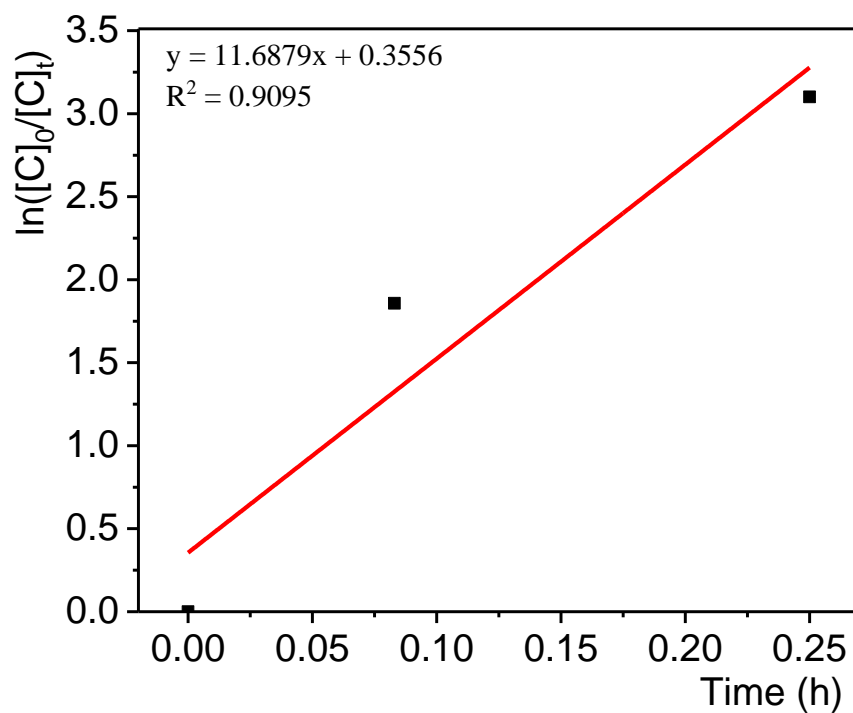**Figure 33. Rate constants of systems catalyzed by Trifluoromethanesulfonic acid at 50 °C**



### 10.3 Arrhenius equation

$$\ln k = \ln A - \frac{E_a}{RT}$$

k is the rate constant of the reaction;  $E_a$  is activation energy; A is preexponential factor;  $E_a$  and A are two very important parameters in chemical kinetics; R is the molar gas constant; T is the thermodynamic temperature. The value of k is obtained at various temperatures, the relationship between  $\ln k$  and  $1/T$  is a straight line, the slope of the straight line is  $-E_a/R$ , and the intercept is  $\ln A$ . The k value at different temperatures is measured experimentally, and the  $E_a$  value can be obtained by plotting  $\ln k$  against  $1/T$ .

**Table S14. Calculation of Activation Energy of Rhenium oxide Catalytic System**

| t (°C) | T (K)  | 1/T    | Rate k (h <sup>-1</sup> ) | ln(k)   |
|--------|--------|--------|---------------------------|---------|
| 30     | 303.15 | 0.0033 | 0.8975                    | -0.1081 |
| 35     | 308.15 | 0.0032 | 1.5443                    | 0.4346  |
| 40     | 313.15 | 0.0032 | 2.1991                    | 0.7880  |
| 45     | 318.15 | 0.0031 | 4.1141                    | 1.4144  |
| 50     | 323.15 | 0.0031 | 4.8478                    | 1.5785  |

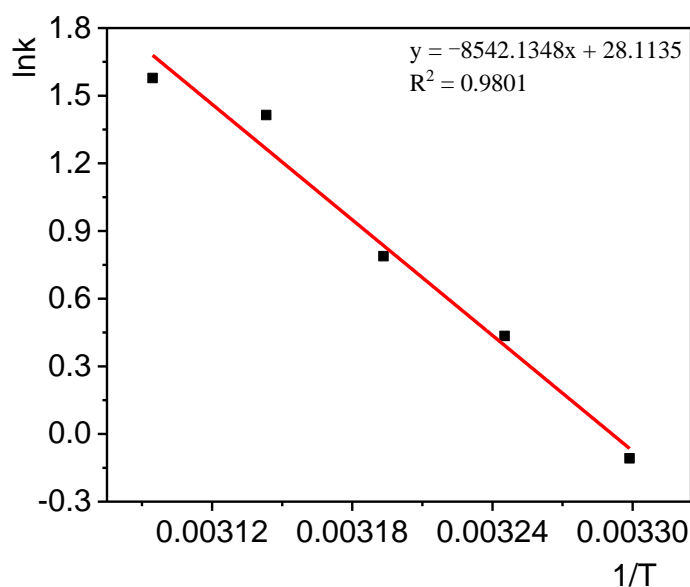

**Figure 34. Calculation of Activation Energy of Rhenium oxide Catalyzed Reaction**

$$E_a = R \cdot 8542.1348 \text{ J/mol} = 71.019 \text{ kJ/mol} = 16.990 \text{ kcal/mol}$$

The activation energy of Rhenium oxide catalyzed **1y** dehydrated Friedel-Crafts alkylation is 16.990 kcal/mol.

**Table S15. Calculation of Activation Energy of Trifluoromethanesulfonic acid Catalytic System**

| t (°C) | T (K)  | 1/T    | Rate k (h <sup>-1</sup> ) | ln(k)  |
|--------|--------|--------|---------------------------|--------|
| 30     | 303.15 | 0.0033 | 3.2645                    | 1.1831 |
| 40     | 313.15 | 0.0032 | 4.8032                    | 1.5693 |
| 45     | 318.15 | 0.0031 | 7.3996                    | 2.0014 |
| 50     | 323.15 | 0.0031 | 11.6879                   | 2.4586 |

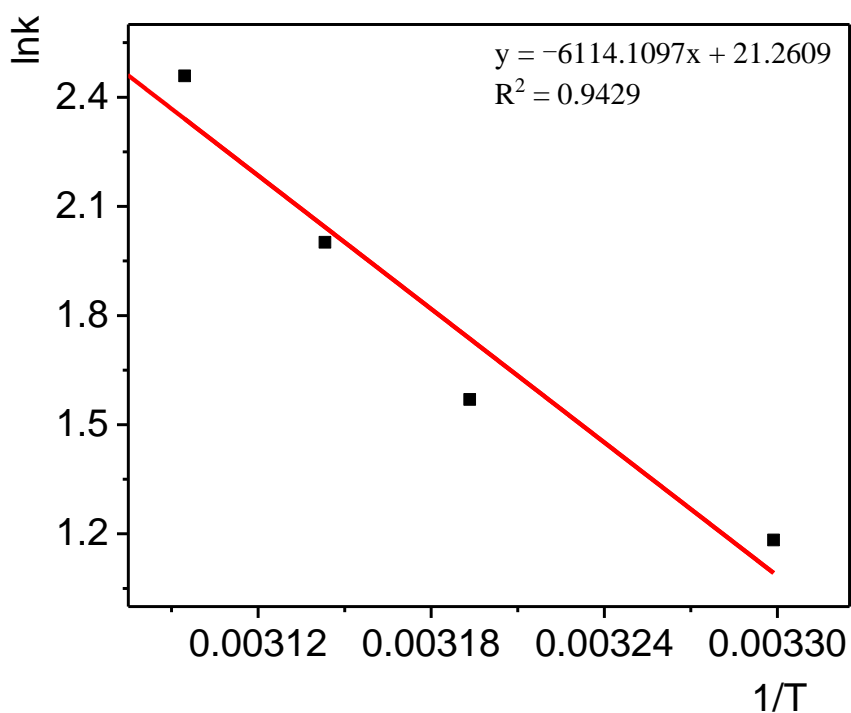

**Figure 35. Calculation of Activation Energy of TfOH Catalyzed reaction**

$$E_a = R * 6114.1097 \text{ J/mol} = 50.832 \text{ kJ/mol} = 12.161 \text{ kcal/mol}$$

The activation energy of Trifluoromethanesulfonic acid catalyzed **1y** dehydrated Friedel-Crafts alkylation is 12.161 kcal/mol.

## 11 DFT results

The density functional calculations were performed at the B3LYP-D3<sup>[21,22]</sup> level using the Gaussian 16 program package.<sup>[23]</sup> Geometries were optimized using the def2-SVP basis sets for all atoms, with SDD pseudopotential<sup>[24]</sup> for Re, followed by analytic frequency calculations at the same theory level. The final and solvation energies in the HFIP solvent were calculated using the SMD continuum solvation model<sup>[25]</sup> (with the related 2-Propanol as the model solvent) at the B3LYP-D3/def2-TZVPP level. The Gibbs energies are reported, including solvation correction and Gibbs free energy correction.

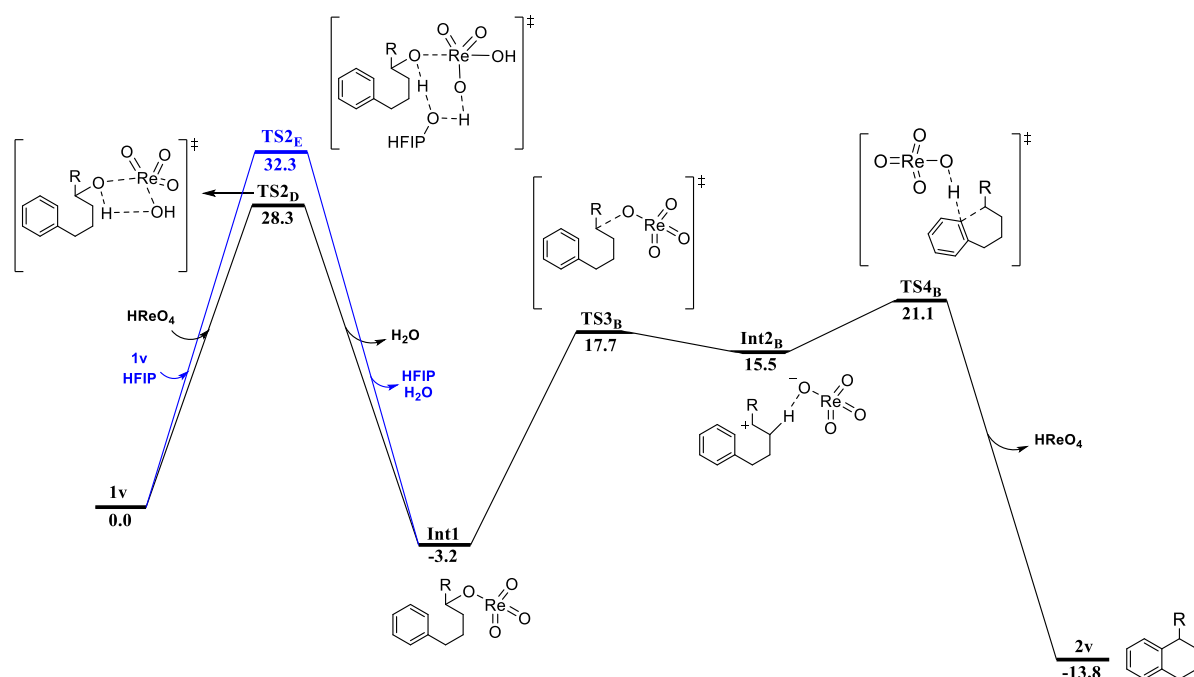

Figure S36. Gibbs energy diagram (in kcal/mol) at the SMD-B3LYP-D3/def2-TZVPP level for HReO<sub>4</sub> catalyzed reaction.

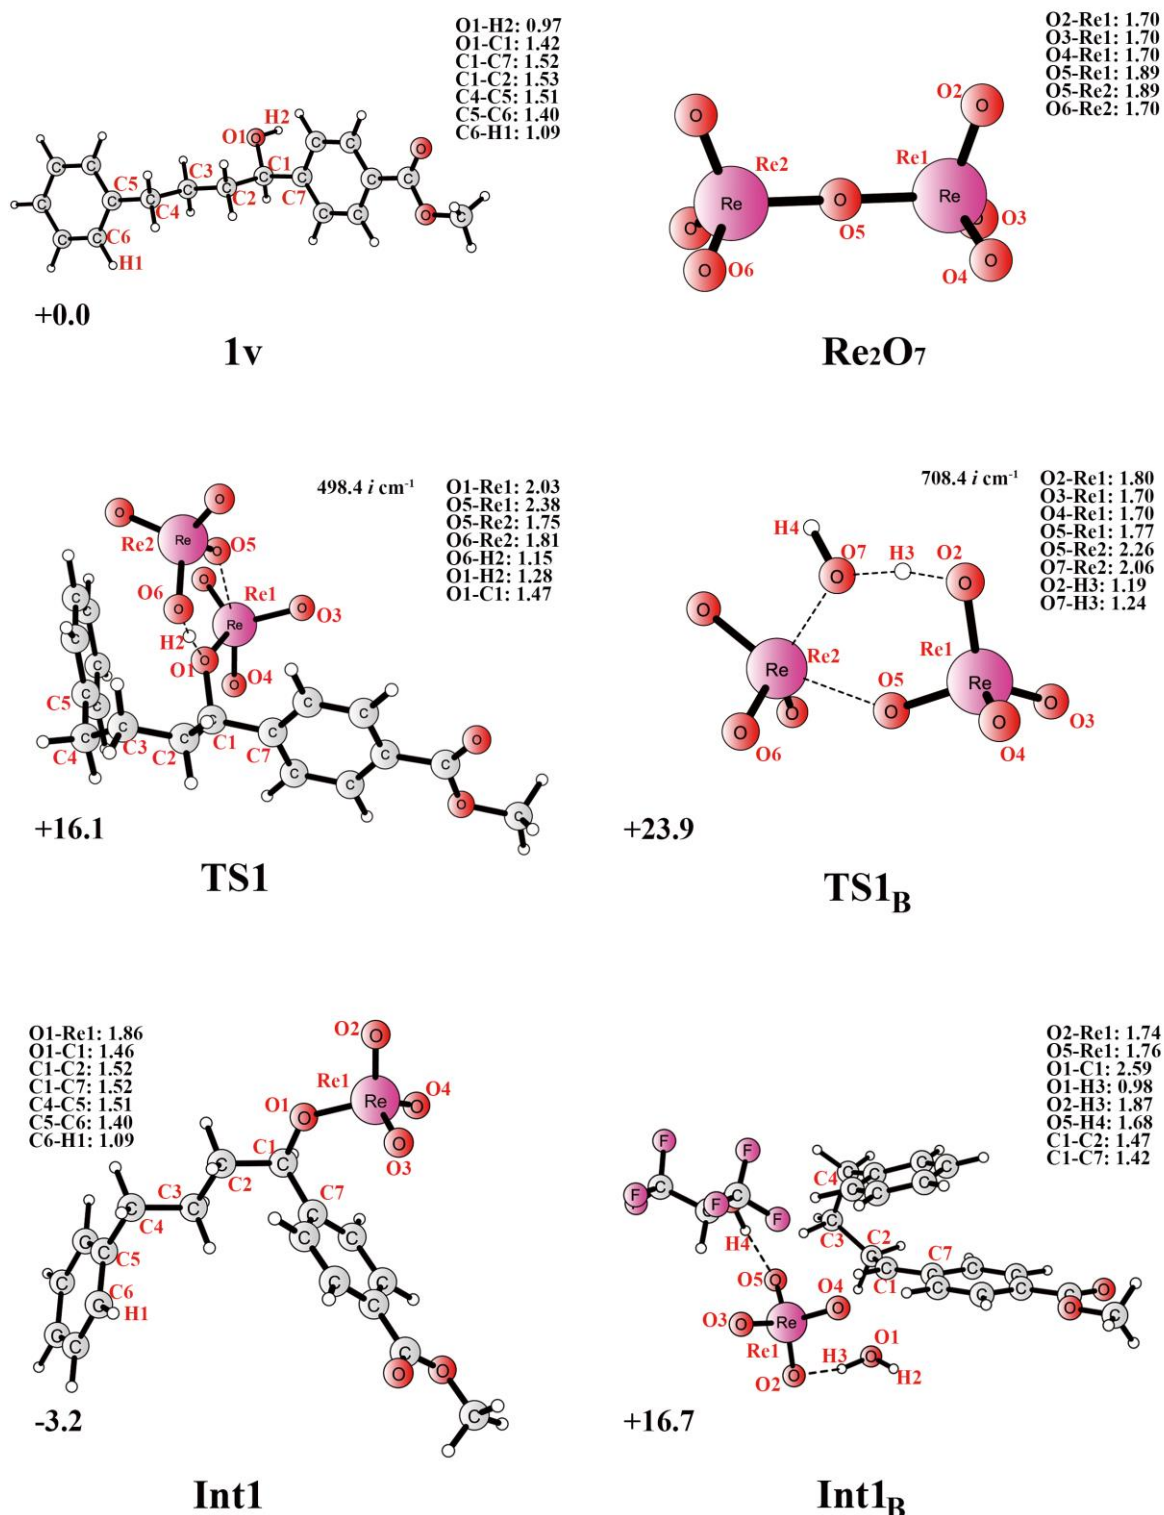

Figure S37. Optimized geometries of the reactants, intermediates, and transition states for the possible catalytic reactions. All distances are given in Å. Energies evaluated at the level of SMD-B3LYP-D3/def2-TZVPP are given in kcal/mol.

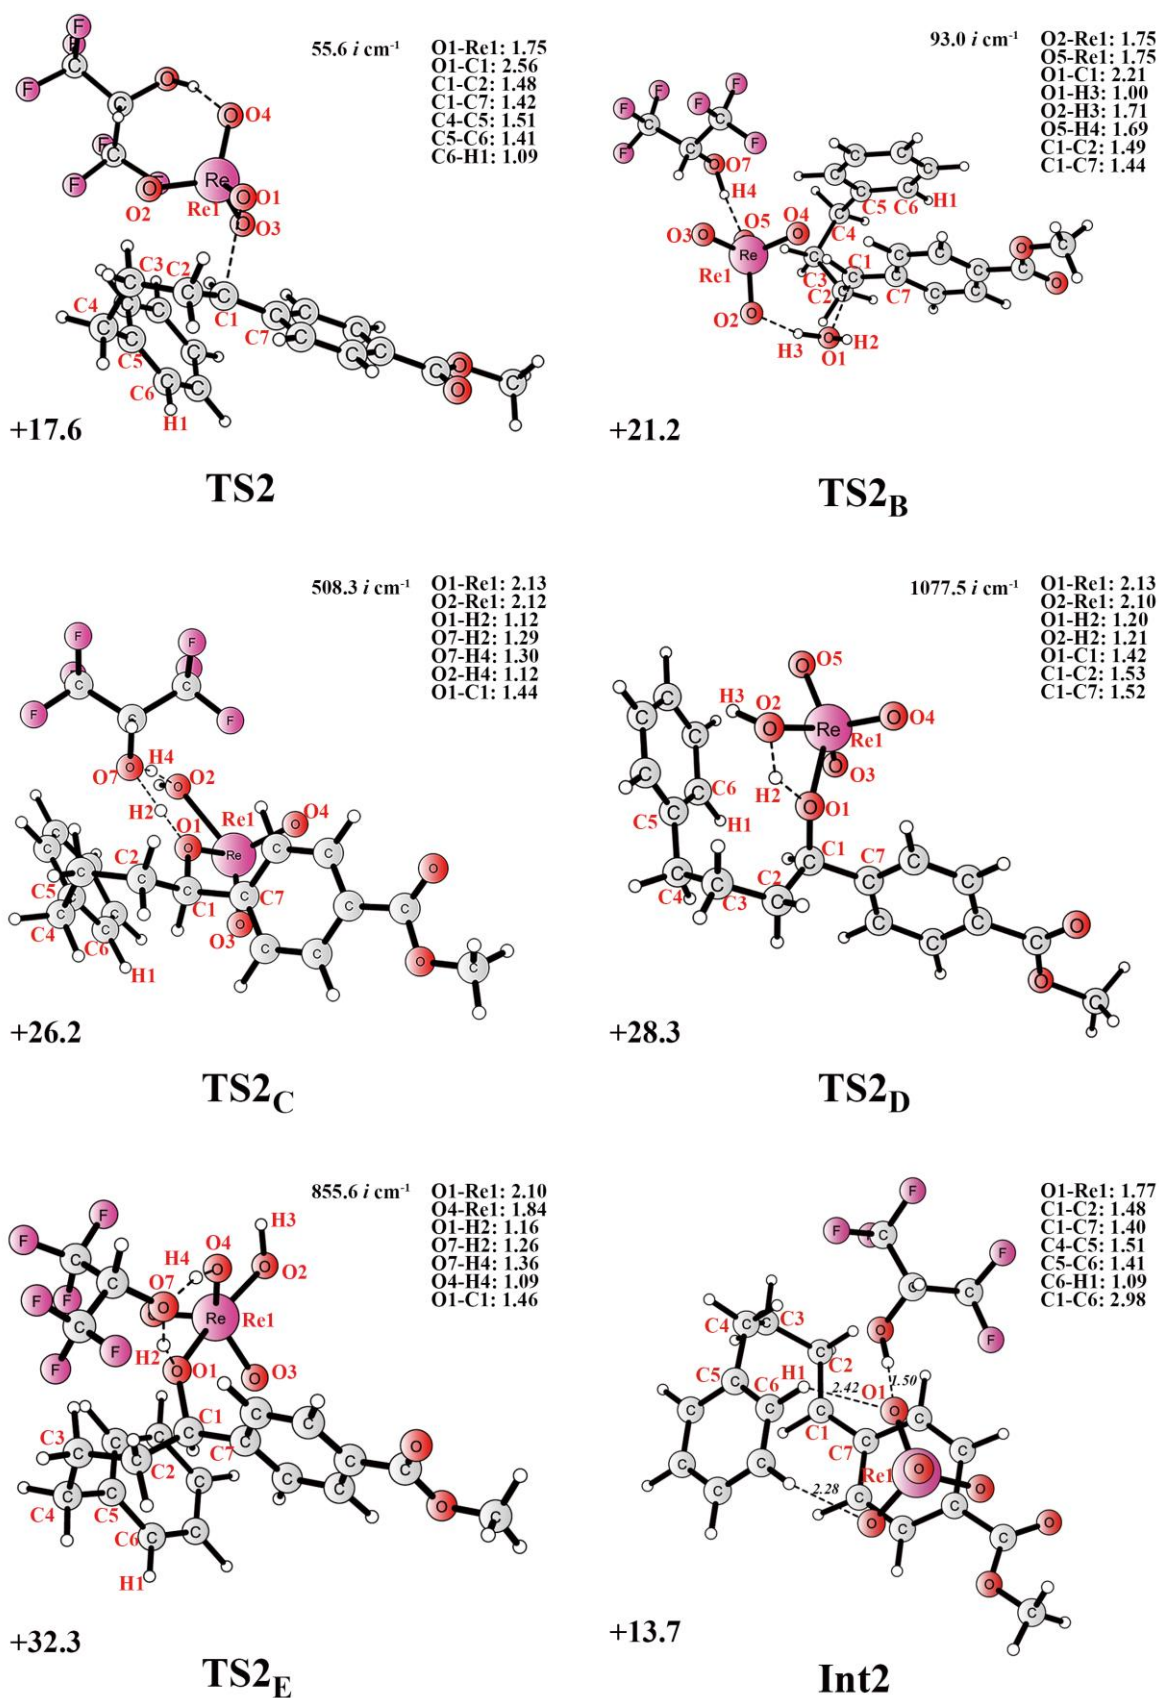

Figure S38. Optimized geometries of the transition states and intermediates for the possible catalytic reactions. All distances are given in Å. Energies evaluated at the level of SMD-B3LYP-D3/def2-TZVPP are given in kcal/mol.

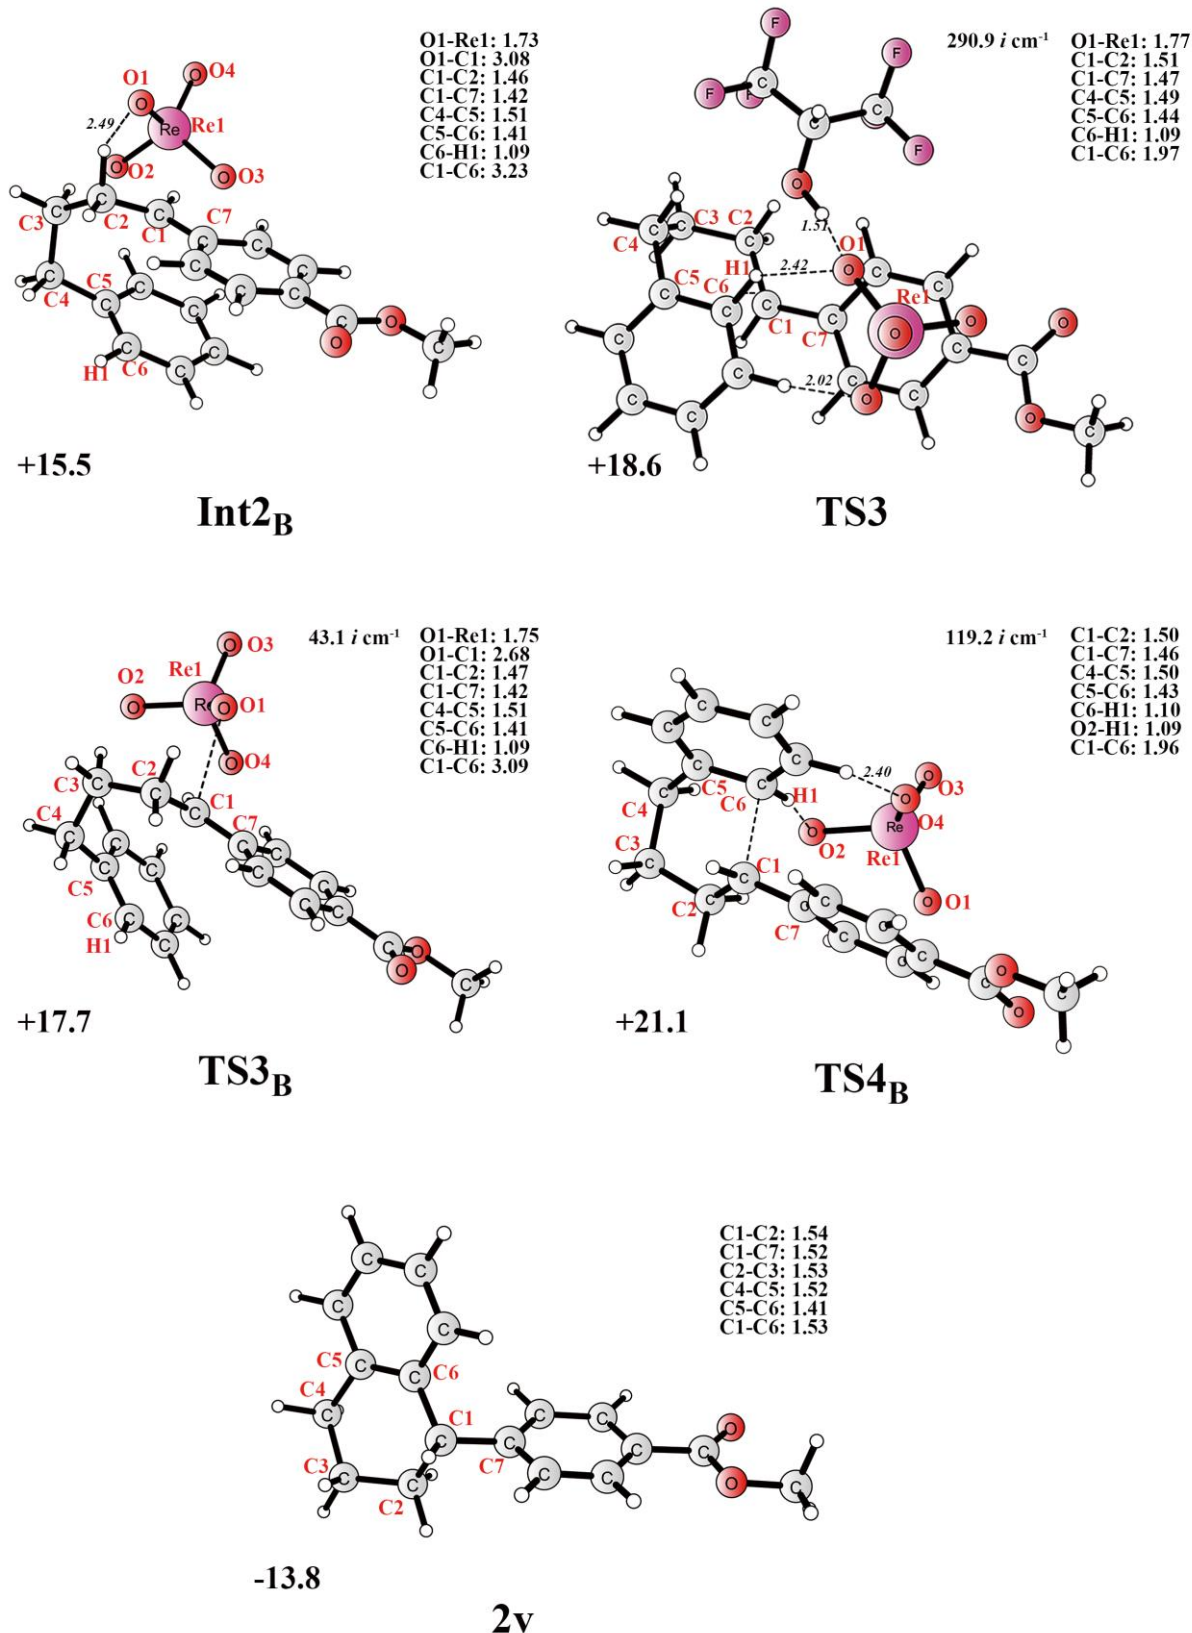

Figure S39. Optimized geometries of the transition states, intermediates, and the product for the possible catalytic reactions. All distances are given in Å. Energies evaluated at the level of SMD-B3LYP-D3/def2-TZVPP are given in kcal/mol.

**12 Cartesian coordinates for all optimized structures**Re<sub>2</sub>O<sub>7</sub>

| Number | Atom | Coordinates (Angstroms) |             |             |
|--------|------|-------------------------|-------------|-------------|
|        |      | X                       | Y           | Z           |
| 1      | Re   | 0.00000000              | 0.00000000  | 1.88983500  |
| 2      | O    | 0.00000000              | 1.59814700  | 2.47923800  |
| 3      | O    | -1.38403600             | -0.79907400 | 2.47923800  |
| 4      | O    | 1.38403600              | -0.79907400 | 2.47923800  |
| 5      | O    | 0.00000000              | 0.00000000  | 0.00000000  |
| 6      | Re   | 0.00000000              | 0.00000000  | -1.88983500 |
| 7      | O    | -1.38403600             | -0.79907400 | -2.47923800 |
| 8      | O    | 1.38403600              | -0.79907400 | -2.47923800 |
| 9      | O    | 0.00000000              | 1.59814700  | -2.47923800 |



1v

| Number | Atom | Coordinates (Angstroms) |             |             |
|--------|------|-------------------------|-------------|-------------|
|        |      | X                       | Y           | Z           |
| 1      | O    | 0.43009700              | 1.96947400  | 1.11411400  |
| 2      | C    | 0.05245100              | 0.60877100  | 0.98555600  |
| 3      | H    | 0.25990300              | 0.05987500  | 1.92858700  |
| 4      | C    | 0.93527000              | 0.00293400  | -0.11198200 |
| 5      | H    | 0.62312600              | -1.04275500 | -0.27462500 |
| 6      | H    | 0.72330200              | 0.54414200  | -1.05081600 |
| 7      | C    | -1.42445200             | 0.44759200  | 0.66047200  |
| 8      | C    | -2.10797400             | -0.72787000 | 1.00711900  |
| 9      | C    | -2.11405300             | 1.45536500  | -0.03080300 |
| 10     | C    | -3.44937800             | -0.90040100 | 0.66895500  |
| 11     | H    | -1.58182300             | -1.51690500 | 1.55292100  |
| 12     | C    | -3.45606100             | 1.29035500  | -0.36901300 |
| 13     | H    | -1.58161700             | 2.37137000  | -0.29439100 |
| 14     | C    | -4.13427300             | 0.11140600  | -0.02368600 |
| 15     | H    | -3.97756200             | -1.81456400 | 0.94248000  |
| 16     | H    | -4.00328700             | 2.06744800  | -0.90648500 |
| 17     | C    | -5.57015100             | -0.01135900 | -0.40963400 |
| 18     | O    | -6.19763700             | 0.83761500  | -1.00107900 |
| 19     | O    | -6.11058900             | -1.18657100 | -0.02706000 |
| 20     | C    | -7.48346200             | -1.38208000 | -0.36147800 |
| 21     | H    | -7.75425400             | -2.37505200 | 0.01886500  |
| 22     | H    | -8.11459100             | -0.60860300 | 0.10350300  |
| 23     | H    | -7.63208800             | -1.33590200 | -1.45168000 |
| 24     | C    | 2.42827000              | 0.06929700  | 0.20918000  |
| 25     | H    | 2.70616300              | 1.11563800  | 0.41103700  |
| 26     | H    | 2.63401900              | -0.48850500 | 1.14059700  |
| 27     | C    | 3.30951600              | -0.49079000 | -0.91936100 |
| 28     | H    | 3.02039900              | -1.53605500 | -1.12447800 |
| 29     | H    | 3.10606900              | 0.07503400  | -1.84521000 |
| 30     | C    | 4.78444500              | -0.42308000 | -0.59560500 |
| 31     | C    | 5.45649300              | -1.52355800 | -0.04159000 |
| 32     | C    | 5.50574400              | 0.76576300  | -0.79301400 |
| 33     | C    | 6.80930900              | -1.44248900 | 0.30278800  |
| 34     | H    | 4.91160000              | -2.45895200 | 0.11840800  |
| 35     | C    | 6.85755700              | 0.85249800  | -0.45056300 |
| 36     | H    | 4.99822900              | 1.63418200  | -1.22396000 |
| 37     | C    | 7.51501600              | -0.25296100 | 0.09952200  |
| 38     | H    | 7.31477600              | -2.31325400 | 0.72906500  |
| 39     | H    | 7.40161000              | 1.78624100  | -0.61648000 |
| 40     | H    | 8.57321800              | -0.18798200 | 0.36551300  |
| 41     | H    | -0.08775800             | 2.36409100  | 1.82817800  |



## TS1

| Number | Atom | Coordinates (Angstroms) |             |             |
|--------|------|-------------------------|-------------|-------------|
|        |      | X                       | Y           | Z           |
| 1      | Re   | -0.04901000             | 0.61988200  | -1.43617400 |
| 2      | O    | 1.13710100              | 0.96630100  | -2.60876200 |
| 3      | O    | -0.95378800             | 2.06165300  | -1.31726600 |
| 4      | O    | -1.13553000             | -0.52059400 | -2.08203400 |
| 5      | O    | 0.15224300              | 0.46220600  | 0.57377000  |
| 6      | C    | -0.82073400             | 1.12300700  | 1.46142600  |
| 7      | H    | -0.77524400             | 2.18850200  | 1.19685000  |
| 8      | C    | -0.44594400             | 0.93189900  | 2.93419900  |
| 9      | H    | -1.21773800             | 1.50048000  | 3.48127300  |
| 10     | H    | -0.60464200             | -0.12395600 | 3.20912000  |
| 11     | C    | -2.20164100             | 0.57894300  | 1.16400000  |
| 12     | C    | -3.26816100             | 1.44384200  | 0.89258200  |
| 13     | C    | -2.41498400             | -0.80854600 | 1.13675400  |
| 14     | C    | -4.53608700             | 0.93515400  | 0.60996800  |
| 15     | H    | -3.09903700             | 2.52313300  | 0.87907500  |
| 16     | C    | -3.67591000             | -1.32109300 | 0.84704400  |
| 17     | H    | -1.58065800             | -1.48923200 | 1.32416300  |
| 18     | C    | -4.74607300             | -0.45142100 | 0.58579400  |
| 19     | H    | -5.36635700             | 1.60753600  | 0.39237700  |
| 20     | H    | -3.85571300             | -2.39700600 | 0.81233300  |
| 21     | C    | -6.07847700             | -1.05543700 | 0.27778500  |
| 22     | O    | -6.30029400             | -2.24396000 | 0.25964200  |
| 23     | O    | -7.01820000             | -0.12653000 | 0.02085900  |
| 24     | C    | -8.32099400             | -0.62145700 | -0.29033200 |
| 25     | H    | -8.94895900             | 0.25984500  | -0.47040300 |
| 26     | H    | -8.29171800             | -1.26130200 | -1.18586200 |
| 27     | H    | -8.72317800             | -1.21567100 | 0.54485500  |
| 28     | C    | 0.94678000              | 1.37161500  | 3.41697400  |
| 29     | H    | 0.90527600              | 1.38606600  | 4.51852700  |
| 30     | H    | 1.68537500              | 0.59696500  | 3.16694800  |
| 31     | C    | 1.45322000              | 2.73747100  | 2.92244500  |
| 32     | H    | 0.65626300              | 3.49476000  | 3.01825700  |
| 33     | H    | 2.26018000              | 3.06398200  | 3.60146600  |
| 34     | C    | 1.99628300              | 2.74131100  | 1.50622900  |
| 35     | C    | 1.50721400              | 3.63112400  | 0.54069600  |
| 36     | C    | 3.01053500              | 1.84394900  | 1.12674800  |
| 37     | C    | 2.01049700              | 3.62882800  | -0.76518300 |
| 38     | H    | 0.71208500              | 4.33302700  | 0.80841400  |
| 39     | C    | 3.51340000              | 1.83176900  | -0.17580600 |
| 40     | H    | 3.41356500              | 1.13636800  | 1.85605100  |
| 41     | C    | 3.01500400              | 2.72889900  | -1.12749400 |
| 42     | H    | 1.59845600              | 4.31707600  | -1.50658000 |
| 43     | H    | 4.28593300              | 1.10922900  | -0.44703800 |
| 44     | H    | 3.38608700              | 2.70388000  | -2.15335800 |
| 45     | O    | 1.45013100              | -1.20116800 | -1.09548300 |
| 46     | H    | 0.87262400              | -0.38239300 | 1.21376900  |
| 47     | Re   | 2.38750800              | -1.90427100 | 0.20246800  |
| 48     | O    | 4.02059000              | -1.40182400 | 0.15210400  |
| 49     | O    | 2.31565200              | -3.60808500 | 0.19289000  |
| 50     | O    | 1.53666200              | -1.21816100 | 1.63987700  |

**TS1<sub>B</sub>**

| Number | Atom | Coordinates (Angstroms) |             |             |
|--------|------|-------------------------|-------------|-------------|
|        |      | X                       | Y           | Z           |
| 1      | Re   | 1.87372400              | -0.07326300 | 0.00000700  |
| 2      | O    | 2.04069100              | -1.04209900 | 1.38936400  |
| 3      | O    | 3.27690400              | 0.89960200  | -0.00021600 |
| 4      | O    | 2.04042600              | -1.04234100 | -1.38921600 |
| 5      | O    | 0.78281000              | 1.66957700  | -0.00012900 |
| 6      | O    | -0.29999800             | -0.67594800 | 0.00004000  |
| 7      | H    | -0.44554400             | 1.83591900  | -0.00009900 |
| 8      | Re   | -1.94729100             | -0.03955200 | 0.00000400  |
| 9      | O    | -2.81510100             | -0.50947000 | 1.38918600  |
| 10     | O    | -2.81504300             | -0.50952900 | -1.38919200 |
| 11     | O    | -1.62658200             | 1.72640500  | -0.00002700 |
| 12     | H    | 1.29024700              | 2.49559000  | 0.00078800  |

## Int1

| Number | Atom | Coordinates (Angstroms) |             |             |
|--------|------|-------------------------|-------------|-------------|
|        |      | X                       | Y           | Z           |
| 1      | R    | 2.69176200              | -1.57638600 | 0.04018700  |
| 2      | O    | 3.56666200              | -2.96281400 | -0.44307400 |
| 3      | O    | 2.98128800              | -1.25015400 | 1.69464600  |
| 4      | O    | 3.19654900              | -0.23084200 | -0.88540100 |
| 5      | O    | 0.88009500              | -1.92966200 | -0.22304600 |
| 6      | C    | -0.28729700             | -1.19458000 | 0.24820200  |
| 7      | H    | -0.39201200             | -1.44112700 | 1.31854200  |
| 8      | C    | -1.48996400             | -1.73564000 | -0.51580400 |
| 9      | H    | -1.34096700             | -1.55799800 | -1.59373000 |
| 10     | H    | -1.50549900             | -2.82984500 | -0.38208700 |
| 11     | C    | -0.03219900             | 0.29200300  | 0.10988900  |
| 12     | C    | 0.23984900              | 1.06367500  | 1.24797300  |
| 13     | C    | 0.03975400              | 0.89207700  | -1.15814000 |
| 14     | C    | 0.56919400              | 2.41486000  | 1.12917700  |
| 15     | H    | 0.20876600              | 0.59885400  | 2.23669000  |
| 16     | C    | 0.36914300              | 2.23797000  | -1.28160300 |
| 17     | H    | -0.14172000             | 0.29691400  | -2.05547500 |
| 18     | C    | 0.63389700              | 3.00857300  | -0.13845900 |
| 19     | H    | 0.78381800              | 3.01264200  | 2.01529800  |
| 20     | H    | 0.43616600              | 2.71664400  | -2.26013900 |
| 21     | C    | 0.98676900              | 4.44909500  | -0.33243200 |
| 22     | O    | 1.03381400              | 4.99938300  | -1.40802600 |
| 23     | O    | 1.24815700              | 5.07548700  | 0.82904800  |
| 24     | C    | 1.60227300              | 6.45571400  | 0.73264400  |
| 25     | H    | 1.78060700              | 6.79881700  | 1.75919000  |
| 26     | H    | 2.50940100              | 6.58362400  | 0.12199500  |
| 27     | H    | 0.78939800              | 7.03595900  | 0.26909600  |
| 28     | C    | -2.81136100             | -1.12134100 | -0.05087500 |
| 29     | H    | -2.94435600             | -1.29140300 | 1.03226900  |
| 30     | H    | -2.78283200             | -0.02675700 | -0.18436300 |
| 31     | C    | -4.02840200             | -1.68683800 | -0.80184800 |
| 32     | H    | -3.89213600             | -1.51565400 | -1.88364200 |
| 33     | H    | -4.06559400             | -2.78055900 | -0.66152000 |
| 34     | C    | -5.32853800             | -1.06506200 | -0.34550100 |
| 35     | C    | -5.77731500             | 0.14416900  | -0.90037800 |
| 36     | C    | -6.08741000             | -1.65005900 | 0.68002400  |
| 37     | C    | -6.95095300             | 0.75144300  | -0.44587600 |
| 38     | H    | -5.19968700             | 0.61358300  | -1.70263400 |
| 39     | C    | -7.26245500             | -1.04678200 | 1.13807500  |
| 40     | H    | -5.75477000             | -2.59408000 | 1.12235900  |
| 41     | C    | -7.69793700             | 0.15727700  | 0.57644500  |
| 42     | H    | -7.28581000             | 1.69066400  | -0.89402200 |
| 43     | H    | -7.84199400             | -1.52090100 | 1.93462200  |
| 44     | H    | -8.61773300             | 0.62911800  | 0.93125900  |

Int1<sub>B</sub>

| Number | Atom | Coordinates (Angstroms) |             |             |
|--------|------|-------------------------|-------------|-------------|
|        |      | X                       | Y           | Z           |
| 1      | Re   | 1.16857300              | -2.06068100 | 0.02975500  |
| 2      | O    | 1.58077800              | -0.80762500 | 1.19228100  |
| 3      | O    | -0.12908900             | -1.46766100 | -0.96172300 |
| 4      | O    | 2.54985600              | -2.43988400 | -0.92660400 |
| 5      | O    | 0.60522200              | -3.45455400 | 0.90377000  |
| 6      | C    | -1.57216400             | 0.15789300  | 1.71655800  |
| 7      | H    | -0.74709300             | -0.20729300 | 1.11099400  |
| 8      | C    | -1.22560600             | 0.54984600  | 3.09314100  |
| 9      | H    | -2.05621400             | 1.04555000  | 3.61692900  |
| 10     | H    | -1.05465300             | -0.42422300 | 3.59182900  |
| 11     | C    | -2.85162800             | 0.16396900  | 1.09457600  |
| 12     | C    | -2.93861700             | -0.29998100 | -0.24449900 |
| 13     | C    | -4.02875600             | 0.61727000  | 1.74790800  |
| 14     | C    | -4.16815900             | -0.32555100 | -0.89889000 |
| 15     | H    | -2.03131000             | -0.65883100 | -0.73902700 |
| 16     | C    | -5.24479400             | 0.59226800  | 1.08960600  |
| 17     | H    | -3.97712900             | 0.98830200  | 2.77206200  |
| 18     | C    | -5.32061100             | 0.11917500  | -0.23740400 |
| 19     | H    | -4.23973500             | -0.68732500 | -1.92460800 |
| 20     | H    | -6.16174900             | 0.93335400  | 1.57287800  |
| 21     | C    | -6.67019000             | 0.12224000  | -0.89593500 |
| 22     | O    | -7.67853600             | 0.51097500  | -0.35507100 |
| 23     | O    | -6.62789800             | -0.35212700 | -2.14777500 |
| 24     | C    | -7.87239200             | -0.38975400 | -2.85442600 |
| 25     | H    | -7.64759600             | -0.80118000 | -3.84553000 |
| 26     | H    | -8.59728700             | -1.02780600 | -2.32646200 |
| 27     | H    | -8.29747100             | 0.62163800  | -2.94282300 |
| 28     | C    | 0.07734400              | 1.36960500  | 3.17462100  |
| 29     | H    | 0.38168500              | 1.45976800  | 4.22875600  |
| 30     | H    | 0.86824400              | 0.80710500  | 2.65867300  |
| 31     | C    | -0.08023700             | 2.77099600  | 2.55044900  |
| 32     | H    | -0.69019600             | 3.40784600  | 3.21158600  |
| 33     | H    | 0.91942100              | 3.23342200  | 2.48830000  |
| 34     | C    | -0.70829000             | 2.72468500  | 1.17868400  |
| 35     | C    | -1.97417600             | 3.29477300  | 0.93783800  |
| 36     | C    | -0.04501900             | 2.08256300  | 0.10853200  |
| 37     | C    | -2.57739600             | 3.19081500  | -0.31289600 |
| 38     | H    | -2.49495600             | 3.80626200  | 1.75206600  |
| 39     | C    | -0.64669600             | 1.98218900  | -1.14741800 |
| 40     | H    | 0.94975400              | 1.66302000  | 0.26207500  |
| 41     | C    | -1.91798200             | 2.52318900  | -1.35715800 |
| 42     | H    | -3.56789500             | 3.62153700  | -0.47840400 |
| 43     | H    | -0.11788100             | 1.46725600  | -1.94959400 |
| 44     | H    | -2.39500900             | 2.43693500  | -2.33642600 |
| 45     | O    | 3.28456800              | 1.15373000  | 0.70777600  |
| 46     | H    | 2.70557400              | 0.42680100  | 1.03331200  |
| 47     | C    | 4.01375600              | 0.66155000  | -0.37058400 |
| 48     | H    | 4.02664600              | -0.44097700 | -0.42869900 |
| 49     | C    | 5.47276100              | 1.10638100  | -0.20917500 |
| 50     | C    | 3.38523100              | 1.13247700  | -1.69133900 |
| 51     | F    | 4.04175200              | 0.67233100  | -2.75920700 |

|    |   |             |             |             |
|----|---|-------------|-------------|-------------|
| 52 | F | 3.31556500  | 2.46446100  | -1.77861900 |
| 53 | F | 2.11657900  | 0.66175600  | -1.76030400 |
| 54 | F | 5.58897200  | 2.43908400  | -0.16667200 |
| 55 | F | 6.23509700  | 0.65586500  | -1.21784000 |
| 56 | F | 5.96641400  | 0.60998500  | 0.93181700  |
| 57 | O | -1.62802700 | -2.38549200 | 2.19520600  |
| 58 | H | -0.82827700 | -2.91139400 | 1.97557400  |
| 59 | H | -2.26251800 | -2.67851500 | 1.52632400  |

---

## TS2

| Number | Atom | Coordinates (Angstroms) |             |             |
|--------|------|-------------------------|-------------|-------------|
|        |      | X                       | Y           | Z           |
| 1      | Re   | -0.64158400             | -0.84451300 | -0.80696500 |
| 2      | O    | -1.66433800             | 0.55124600  | -0.92417600 |
| 3      | O    | 0.10836300              | -0.85913500 | 0.75562100  |
| 4      | O    | -1.60165500             | -2.27374100 | -1.05132900 |
| 5      | O    | 0.64215300              | -0.66375700 | -1.98514700 |
| 6      | C    | 1.90437300              | 1.33023100  | -1.00048800 |
| 7      | H    | 1.10408200              | 1.14428400  | -0.29117800 |
| 8      | C    | 1.61918000              | 2.20163300  | -2.15841200 |
| 9      | H    | 2.49206400              | 2.84012000  | -2.38140000 |
| 10     | H    | 1.54479800              | 1.49163800  | -3.00684300 |
| 11     | C    | 3.13638800              | 0.69981900  | -0.68505200 |
| 12     | C    | 3.16015100              | -0.16992200 | 0.43909600  |
| 13     | C    | 4.31756000              | 0.87982500  | -1.45411300 |
| 14     | C    | 4.33166500              | -0.83440300 | 0.78156400  |
| 15     | H    | 2.23815200              | -0.32861100 | 1.00388700  |
| 16     | C    | 5.48074100              | 0.21832600  | -1.10257900 |
| 17     | H    | 4.31100100              | 1.53815100  | -2.32421900 |
| 18     | C    | 5.49274700              | -0.63957100 | 0.01660600  |
| 19     | H    | 4.35643000              | -1.51026000 | 1.63621700  |
| 20     | H    | 6.40219300              | 0.33967000  | -1.67429100 |
| 21     | C    | 6.78866400              | -1.32839100 | 0.34277700  |
| 22     | O    | 7.80513000              | -1.17291500 | -0.29148900 |
| 23     | O    | 6.68468500              | -2.12799000 | 1.41042400  |
| 24     | C    | 7.86988900              | -2.83572900 | 1.79211400  |
| 25     | H    | 7.59795600              | -3.43318000 | 2.67016400  |
| 26     | H    | 8.21102700              | -3.48601900 | 0.97243200  |
| 27     | H    | 8.67793300              | -2.13030300 | 2.03851800  |
| 28     | C    | 0.31857800              | 3.00923300  | -2.07261600 |
| 29     | H    | 0.15206800              | 3.50601800  | -3.04135300 |
| 30     | H    | -0.52113400             | 2.31418900  | -1.91878000 |
| 31     | C    | 0.32045000              | 4.06687900  | -0.94495300 |
| 32     | H    | 1.10156200              | 4.82053300  | -1.14073200 |
| 33     | H    | -0.64782000             | 4.59264400  | -0.96617700 |
| 34     | C    | 0.53819800              | 3.43234500  | 0.40677100  |
| 35     | C    | 1.80310300              | 3.46411300  | 1.02562600  |
| 36     | C    | -0.48612600             | 2.67058200  | 1.00556100  |
| 37     | C    | 2.04269000              | 2.74526000  | 2.20473400  |
| 38     | H    | 2.60474400              | 4.06025300  | 0.57989300  |
| 39     | C    | -0.24005000             | 1.93529400  | 2.16256200  |
| 40     | H    | -1.46548000             | 2.60015400  | 0.52892800  |
| 41     | C    | 1.02760000              | 1.97076200  | 2.76594300  |
| 42     | H    | 3.03011500              | 2.78162300  | 2.67176400  |
| 43     | H    | -1.03185600             | 1.30831900  | 2.57504300  |
| 44     | H    | 1.21588900              | 1.38630400  | 3.66960100  |
| 45     | O    | -4.03621600             | -2.21634300 | 0.32059500  |
| 46     | H    | -3.21599800             | -2.41076600 | -0.17475100 |
| 47     | C    | -4.33009700             | -0.86629200 | 0.19158800  |
| 48     | H    | -3.79001800             | -0.36465100 | -0.62739700 |
| 49     | C    | -5.82116600             | -0.72170000 | -0.13607100 |
| 50     | C    | -3.93105000             | -0.10119900 | 1.46829400  |
| 51     | F    | -6.18817300             | 0.57334400  | -0.15525600 |

|    |   |             |             |             |
|----|---|-------------|-------------|-------------|
| 52 | F | -6.06156500 | -1.23124000 | -1.35218400 |
| 53 | F | -6.60212400 | -1.35851200 | 0.73988200  |
| 54 | F | -3.96038600 | 1.22991400  | 1.28029800  |
| 55 | F | -2.67032500 | -0.42579300 | 1.81517700  |
| 56 | F | -4.71907800 | -0.38584100 | 2.51134800  |

---

TS2<sub>B</sub>

| Number | Atom | Coordinates (Angstroms) |             |             |
|--------|------|-------------------------|-------------|-------------|
|        |      | X                       | Y           | Z           |
| 1      | Re   | -1.22192800             | 1.95801000  | -0.26695000 |
| 2      | O    | -1.67515700             | 0.88128100  | 1.04065000  |
| 3      | O    | 0.02754100              | 1.18975500  | -1.19156700 |
| 4      | O    | -2.59275200             | 2.31048800  | -1.24507800 |
| 5      | O    | -0.54128300             | 3.40147300  | 0.44735000  |
| 6      | C    | 1.68419800              | 0.47982400  | 1.72793100  |
| 7      | H    | 0.82940200              | 0.53856400  | 1.05949600  |
| 8      | C    | 1.36630400              | 0.30279200  | 3.16770300  |
| 9      | H    | 2.23663900              | -0.05153700 | 3.73961200  |
| 10     | H    | 1.12860700              | 1.31149000  | 3.54398600  |
| 11     | C    | 2.94976600              | 0.26939900  | 1.08036000  |
| 12     | C    | 2.98015000              | 0.30557300  | -0.33529400 |
| 13     | C    | 4.15084500              | 0.03764800  | 1.79442800  |
| 14     | C    | 4.18085500              | 0.11377300  | -1.01490300 |
| 15     | H    | 2.05223000              | 0.49270000  | -0.88197800 |
| 16     | C    | 5.34020600              | -0.15676700 | 1.11188500  |
| 17     | H    | 4.14395200              | 0.00804900  | 2.88463600  |
| 18     | C    | 5.36108400              | -0.12083700 | -0.29671400 |
| 19     | H    | 4.20735000              | 0.13691800  | -2.10431200 |
| 20     | H    | 6.27653300              | -0.34033700 | 1.64144100  |
| 21     | C    | 6.67978400              | -0.34726600 | -0.97598800 |
| 22     | O    | 7.71302700              | -0.55544200 | -0.38457900 |
| 23     | O    | 6.58168800              | -0.29472100 | -2.31170100 |
| 24     | C    | 7.79372800              | -0.49953600 | -3.04466000 |
| 25     | H    | 7.52546800              | -0.42277300 | -4.10504000 |
| 26     | H    | 8.54042200              | 0.26420700  | -2.77896800 |
| 27     | H    | 8.21656100              | -1.49151000 | -2.82396600 |
| 28     | C    | 0.12740300              | -0.58865400 | 3.40943600  |
| 29     | H    | -0.17261000             | -0.47957300 | 4.46368600  |
| 30     | H    | -0.70222500             | -0.19841700 | 2.80131200  |
| 31     | C    | 0.36594000              | -2.07651700 | 3.09774500  |
| 32     | H    | 1.06800900              | -2.50019900 | 3.83490100  |
| 33     | H    | -0.59124800             | -2.60936600 | 3.22994700  |
| 34     | C    | 0.89550700              | -2.32123200 | 1.70359900  |
| 35     | C    | 2.17883800              | -2.86249600 | 1.50463800  |
| 36     | C    | 0.12238800              | -1.99111900 | 0.57098800  |
| 37     | C    | 2.68865500              | -3.04557000 | 0.21973400  |
| 38     | H    | 2.78816500              | -3.12991300 | 2.37257300  |
| 39     | C    | 0.63266200              | -2.16915600 | -0.71643000 |
| 40     | H    | -0.88620400             | -1.59325700 | 0.69257500  |
| 41     | C    | 1.91846000              | -2.69007000 | -0.89499600 |
| 42     | H    | 3.69301300              | -3.45470600 | 0.08499900  |
| 43     | H    | 0.01936800              | -1.89178400 | -1.57390300 |
| 44     | H    | 2.31929000              | -2.82469200 | -1.90272100 |
| 45     | O    | -3.39970200             | -1.12657100 | 0.89496400  |
| 46     | H    | -2.79514300             | -0.38299800 | 1.11168700  |
| 47     | C    | -4.09812500             | -0.77306700 | -0.25427800 |
| 48     | H    | -4.08982800             | 0.31188900  | -0.46170500 |
| 49     | C    | -5.56901400             | -1.16431000 | -0.06355200 |
| 50     | C    | -3.45695700             | -1.42951400 | -1.48679500 |
| 51     | F    | -4.07731300             | -1.09225400 | -2.62118100 |



|    |   |             |             |             |
|----|---|-------------|-------------|-------------|
| 52 | F | -3.42599700 | -2.76185700 | -1.40157400 |
| 53 | F | -2.17432300 | -1.00344100 | -1.58471000 |
| 54 | F | -5.71428600 | -2.47464200 | 0.16367300  |
| 55 | F | -6.30157900 | -0.84679400 | -1.14283600 |
| 56 | F | -6.07433300 | -0.50202800 | 0.98440100  |
| 57 | O | 1.73265900  | 2.69038400  | 1.68224900  |
| 58 | H | 0.86959600  | 3.07010000  | 1.35641700  |
| 59 | H | 2.35346800  | 2.90500800  | 0.96929700  |

---

TS2<sub>c</sub>

| Number | Atom | Coordinates (Angstroms) |             |             |
|--------|------|-------------------------|-------------|-------------|
|        |      | X                       | Y           | Z           |
| 1      | Re   | -0.03642500             | -1.52843500 | -1.24805700 |
| 2      | O    | -0.82239100             | -2.67224800 | -2.25131400 |
| 3      | O    | 0.99661200              | -2.49769600 | -0.28771600 |
| 4      | O    | 0.97501700              | -0.61557300 | -2.26614600 |
| 5      | O    | -0.12666000             | -0.25008500 | 0.45847800  |
| 6      | C    | 0.76896900              | -0.36001700 | 1.58551200  |
| 7      | H    | 0.77061000              | -1.42062200 | 1.87633200  |
| 8      | C    | 0.27242600              | 0.48762500  | 2.76245000  |
| 9      | H    | 1.00840200              | 0.31685400  | 3.56609900  |
| 10     | H    | 0.37087300              | 1.55421500  | 2.49436100  |
| 11     | C    | 2.17320100              | 0.03075100  | 1.17443000  |
| 12     | C    | 3.27643600              | -0.65860200 | 1.69351300  |
| 13     | C    | 2.38337600              | 1.10112400  | 0.29336400  |
| 14     | C    | 4.57410500              | -0.28026300 | 1.35186400  |
| 15     | H    | 3.11721700              | -1.51077600 | 2.35989700  |
| 16     | C    | 3.67772200              | 1.47949500  | -0.05546700 |
| 17     | H    | 1.52759200              | 1.62306800  | -0.13713600 |
| 18     | C    | 4.78223800              | 0.79525400  | 0.47432400  |
| 19     | H    | 5.43262200              | -0.82059700 | 1.75186800  |
| 20     | H    | 3.85651600              | 2.30517700  | -0.74657200 |
| 21     | C    | 6.14654600              | 1.24423400  | 0.06677300  |
| 22     | O    | 6.36943900              | 2.17263400  | -0.67596400 |
| 23     | O    | 7.12330600              | 0.49890000  | 0.62181400  |
| 24     | C    | 8.45955800              | 0.86243000  | 0.27829900  |
| 25     | H    | 9.11507900              | 0.16054900  | 0.80889100  |
| 26     | H    | 8.61851100              | 0.78802400  | -0.80879600 |
| 27     | H    | 8.67601000              | 1.89719200  | 0.58680300  |
| 28     | C    | -1.14567800             | 0.22167800  | 3.30235100  |
| 29     | H    | -1.20221000             | 0.70698300  | 4.29023800  |
| 30     | H    | -1.88784100             | 0.73320900  | 2.67416600  |
| 31     | C    | -1.55884000             | -1.25900800 | 3.45415100  |
| 32     | H    | -0.69948000             | -1.86410500 | 3.78895900  |
| 33     | H    | -2.30119300             | -1.32031200 | 4.26780300  |
| 34     | C    | -2.18437400             | -1.88752900 | 2.22201700  |
| 35     | C    | -1.60693100             | -2.99309200 | 1.57831300  |
| 36     | C    | -3.38941400             | -1.38059400 | 1.70861200  |
| 37     | C    | -2.21138700             | -3.57623800 | 0.45807600  |
| 38     | H    | -0.66337700             | -3.40349800 | 1.94610000  |
| 39     | C    | -4.00464800             | -1.96481800 | 0.59804500  |
| 40     | H    | -3.85222400             | -0.50871600 | 2.17696200  |
| 41     | C    | -3.41879200             | -3.06732700 | -0.03320300 |
| 42     | H    | -1.73153100             | -4.42237700 | -0.03744700 |
| 43     | H    | -4.94514300             | -1.55072400 | 0.22417400  |
| 44     | H    | -3.89111600             | -3.52755800 | -0.90474900 |
| 45     | O    | -1.90232600             | -0.51801800 | -1.35104800 |
| 46     | H    | -0.94932600             | 0.50613000  | 0.53957200  |
| 47     | H    | -2.65512500             | -1.07141500 | -1.60685300 |
| 48     | O    | -2.07576300             | 1.11072100  | 0.37162500  |
| 49     | H    | -2.18261300             | 0.28689500  | -0.62973000 |
| 50     | C    | -2.20981000             | 2.47260300  | 0.22302300  |
| 51     | H    | -1.63519100             | 3.03374100  | 0.98428900  |

|    |   |             |            |             |
|----|---|-------------|------------|-------------|
| 52 | C | -3.68611300 | 2.83015600 | 0.45329600  |
| 53 | C | -1.67377600 | 2.94085700 | -1.14032600 |
| 54 | F | -4.02611400 | 2.50736500 | 1.71230700  |
| 55 | F | -3.91792900 | 4.13780100 | 0.28492400  |
| 56 | F | -4.48956200 | 2.14927600 | -0.37373100 |
| 57 | F | -1.66061100 | 4.27242600 | -1.24382200 |
| 58 | F | -0.40693900 | 2.50055700 | -1.28186800 |
| 59 | F | -2.38906300 | 2.44144900 | -2.15506400 |

---

TS2<sub>D</sub>

| Number | Atom | Coordinates (Angstroms) |             |             |
|--------|------|-------------------------|-------------|-------------|
|        |      | X                       | Y           | Z           |
| 1      | Re   | -1.18529200             | -1.44996700 | -0.05600600 |
| 2      | O    | -2.51158900             | -2.40472200 | 0.45878400  |
| 3      | O    | -0.41554500             | -0.98449500 | 1.40150400  |
| 4      | O    | -0.12888400             | -2.48988900 | -0.89707800 |
| 5      | O    | -0.57421000             | 0.42497900  | -0.86921400 |
| 6      | C    | 0.20995000              | 1.44507100  | -0.26617400 |
| 7      | H    | -0.14779700             | 1.58814400  | 0.76754300  |
| 8      | C    | 0.04016600              | 2.75163200  | -1.05072400 |
| 9      | H    | 0.63758400              | 3.51796700  | -0.52837600 |
| 10     | H    | 0.50323600              | 2.61866400  | -2.04256100 |
| 11     | C    | 1.66346900              | 1.02028700  | -0.19522700 |
| 12     | C    | 2.50504700              | 1.58748300  | 0.77259800  |
| 13     | C    | 2.19229500              | 0.09172800  | -1.10200700 |
| 14     | C    | 3.85420800              | 1.24446100  | 0.83226500  |
| 15     | H    | 2.09595600              | 2.29883700  | 1.49613000  |
| 16     | C    | 3.53999500              | -0.25922500 | -1.04265200 |
| 17     | H    | 1.53612200              | -0.37229000 | -1.83949700 |
| 18     | C    | 4.38199200              | 0.31622100  | -0.07972700 |
| 19     | H    | 4.50536100              | 1.68349100  | 1.58882700  |
| 20     | H    | 3.96218800              | -0.98773100 | -1.73734100 |
| 21     | C    | 5.81591800              | -0.09610900 | -0.06348500 |
| 22     | O    | 6.31342900              | -0.88371400 | -0.83529500 |
| 23     | O    | 6.51762500              | 0.51056800  | 0.91624700  |
| 24     | C    | 7.89908400              | 0.16578100  | 1.00081500  |
| 25     | H    | 8.30897700              | 0.74143000  | 1.84026300  |
| 26     | H    | 8.02363100              | -0.91366300 | 1.17977600  |
| 27     | H    | 8.42535900              | 0.42137600  | 0.06776100  |
| 28     | C    | -1.39876600             | 3.25657500  | -1.22456100 |
| 29     | H    | -1.33873600             | 4.22533000  | -1.74652800 |
| 30     | H    | -1.95241600             | 2.59208900  | -1.90981500 |
| 31     | C    | -2.21733300             | 3.43999700  | 0.07933400  |
| 32     | H    | -1.54186500             | 3.70096100  | 0.91088900  |
| 33     | H    | -2.88513000             | 4.30729700  | -0.05036600 |
| 34     | C    | -3.07524800             | 2.25050500  | 0.46315300  |
| 35     | C    | -2.75744900             | 1.40956400  | 1.54147400  |
| 36     | C    | -4.22865200             | 1.95548900  | -0.28355200 |
| 37     | C    | -3.54768700             | 0.29753800  | 1.85187100  |
| 38     | H    | -1.87067500             | 1.61302600  | 2.14600800  |
| 39     | C    | -5.02869900             | 0.84845500  | 0.02512600  |
| 40     | H    | -4.50411400             | 2.60154100  | -1.12233100 |
| 41     | C    | -4.68483100             | 0.00858900  | 1.09143500  |
| 42     | H    | -3.25828900             | -0.35793000 | 2.67528900  |
| 43     | H    | -5.92480100             | 0.64368100  | -0.56680100 |
| 44     | H    | -5.28901400             | -0.87090600 | 1.32224900  |
| 45     | O    | -2.48585700             | -0.51348000 | -1.41039500 |
| 46     | H    | -1.68126800             | 0.38897600  | -1.33364000 |
| 47     | H    | -3.40792700             | -0.37100800 | -1.13322600 |

TS2<sub>E</sub>

| Number | Atom | Coordinates (Angstroms) |             |             |
|--------|------|-------------------------|-------------|-------------|
|        |      | X                       | Y           | Z           |
| 1      | Re   | 0.68358200              | 1.14270400  | -1.66677600 |
| 2      | O    | 2.13120000              | 1.87912700  | -1.16469200 |
| 3      | O    | -0.67599900             | 2.00986500  | -1.10547800 |
| 4      | O    | 0.52428700              | 1.74762900  | -3.44809500 |
| 5      | O    | 0.49919400              | 0.05674100  | 0.11597300  |
| 6      | C    | -0.46820800             | 0.32202600  | 1.17063100  |
| 7      | H    | -0.53480800             | 1.41112500  | 1.24349900  |
| 8      | C    | 0.07096000              | -0.25494500 | 2.48499300  |
| 9      | H    | -0.69214100             | -0.06197700 | 3.25844000  |
| 10     | H    | 0.12593500              | -1.35019400 | 2.38135000  |
| 11     | C    | -1.82997900             | -0.22179600 | 0.79667300  |
| 12     | C    | -2.94815500             | 0.62162500  | 0.85829500  |
| 13     | C    | -1.99922300             | -1.55981200 | 0.40246700  |
| 14     | C    | -4.21951300             | 0.14173800  | 0.54429100  |
| 15     | H    | -2.81346300             | 1.66831700  | 1.14235000  |
| 16     | C    | -3.26668400             | -2.03953300 | 0.08020600  |
| 17     | H    | -1.13668100             | -2.22525300 | 0.33280200  |
| 18     | C    | -4.38600300             | -1.19496300 | 0.15148200  |
| 19     | H    | -5.08743800             | 0.80034900  | 0.59025200  |
| 20     | H    | -3.41398700             | -3.07521300 | -0.23191300 |
| 21     | C    | -5.71831600             | -1.76550500 | -0.20632100 |
| 22     | O    | -5.90362600             | -2.90897500 | -0.55583100 |
| 23     | O    | -6.71374700             | -0.86254100 | -0.09883600 |
| 24     | C    | -8.02113700             | -1.33021300 | -0.42617900 |
| 25     | H    | -8.69679800             | -0.47711600 | -0.28616500 |
| 26     | H    | -8.06151200             | -1.68388900 | -1.46830200 |
| 27     | H    | -8.31525500             | -2.16384900 | 0.23054900  |
| 28     | C    | 1.43595700              | 0.29231600  | 2.92943300  |
| 29     | H    | 1.88506200              | -0.43146000 | 3.62796100  |
| 30     | H    | 2.10994400              | 0.32179800  | 2.05951100  |
| 31     | C    | 1.40454500              | 1.66967100  | 3.62227900  |
| 32     | H    | 0.81727700              | 1.59136900  | 4.55275300  |
| 33     | H    | 2.43522700              | 1.92323000  | 3.92512300  |
| 34     | C    | 0.84311700              | 2.78485800  | 2.76776000  |
| 35     | C    | -0.39691400             | 3.37280100  | 3.06091000  |
| 36     | C    | 1.51750100              | 3.19665700  | 1.60640100  |
| 37     | C    | -0.96104300             | 4.32720300  | 2.20682700  |
| 38     | H    | -0.93710100             | 3.06472500  | 3.96094600  |
| 39     | C    | 0.95786800              | 4.14759600  | 0.75121700  |
| 40     | H    | 2.47632200              | 2.74157600  | 1.34602600  |
| 41     | C    | -0.28792700             | 4.71225100  | 1.04422900  |
| 42     | H    | -1.93295700             | 4.76571700  | 2.44848000  |
| 43     | H    | 1.49054900              | 4.42985100  | -0.15962900 |
| 44     | H    | -0.73296800             | 5.44417500  | 0.36603900  |
| 45     | O    | 0.88269600              | -0.57262900 | -2.29857100 |
| 46     | H    | 0.83554700              | -1.04712700 | 0.01476300  |
| 47     | H    | 1.02322600              | 1.27101500  | -4.13147700 |
| 48     | C    | 2.23383700              | -2.86890200 | -0.23592100 |
| 49     | H    | 2.34644000              | -3.73733700 | -0.91046400 |
| 50     | O    | 1.07460100              | -2.17023900 | -0.50997900 |
| 51     | H    | 0.98251500              | -1.45219600 | -1.65970500 |

|    |   |            |             |             |
|----|---|------------|-------------|-------------|
| 52 | C | 2.18076000 | -3.45446400 | 1.18652200  |
| 53 | C | 3.47688000 | -1.98956900 | -0.46796700 |
| 54 | F | 3.57210000 | -1.69981100 | -1.77563600 |
| 55 | F | 3.38523200 | -0.82405900 | 0.19365800  |
| 56 | F | 4.60680700 | -2.59780000 | -0.09334000 |
| 57 | F | 3.14823800 | -4.35888500 | 1.37475000  |
| 58 | F | 2.31805600 | -2.50012300 | 2.12561800  |
| 59 | F | 1.00286000 | -4.05448600 | 1.38936300  |

---

## Int2

| Number | Atom | Coordinates (Angstroms) |             |             |
|--------|------|-------------------------|-------------|-------------|
|        |      | X                       | Y           | Z           |
| 1      | Re   | 2.02247100              | -0.10072600 | -1.45299300 |
| 2      | O    | 0.28059100              | -0.26466800 | -1.22051900 |
| 3      | O    | 2.42658800              | -0.39213200 | -3.09992100 |
| 4      | O    | 2.49088900              | 1.50849000  | -1.01144100 |
| 5      | O    | 2.85723400              | -1.22990900 | -0.43596000 |
| 6      | C    | -1.55412700             | 1.75545600  | 2.02400800  |
| 7      | H    | -1.51781600             | 2.84871900  | 2.07591000  |
| 8      | C    | -2.88967200             | 1.12368600  | 2.05073900  |
| 9      | H    | -2.84424700             | 0.11569200  | 1.61948400  |
| 10     | H    | -3.11838700             | 0.99611400  | 3.13221000  |
| 11     | C    | -0.32013200             | 1.08891900  | 2.06424900  |
| 12     | C    | 0.88349400              | 1.85897000  | 2.00952500  |
| 13     | C    | -0.22261500             | -0.33500600 | 2.15984800  |
| 14     | C    | 2.11752600              | 1.23845000  | 2.03380500  |
| 15     | H    | 0.81383500              | 2.94299600  | 1.89929500  |
| 16     | C    | 1.01355300              | -0.94194700 | 2.22653900  |
| 17     | H    | -1.12377200             | -0.94208800 | 2.18426100  |
| 18     | C    | 2.18561600              | -0.16374500 | 2.15222900  |
| 19     | H    | 3.03746600              | 1.81095300  | 1.92927500  |
| 20     | H    | 1.11151800              | -2.02561300 | 2.29059100  |
| 21     | C    | 3.49907900              | -0.89721400 | 2.16567100  |
| 22     | O    | 3.60845300              | -2.04586400 | 2.51654600  |
| 23     | O    | 4.50238600              | -0.12044300 | 1.75310000  |
| 24     | C    | 5.73894400              | -0.78687500 | 1.48182000  |
| 25     | H    | 6.44331900              | -0.00684000 | 1.16957300  |
| 26     | H    | 6.10677800              | -1.31055400 | 2.37685100  |
| 27     | H    | 5.58691000              | -1.51536200 | 0.67088600  |
| 28     | C    | -4.03001100             | 1.93137100  | 1.41148200  |
| 29     | H    | -4.96228700             | 1.36025600  | 1.54294800  |
| 30     | H    | -4.16094000             | 2.88532900  | 1.95097600  |
| 31     | C    | -3.80282900             | 2.21242500  | -0.08942900 |
| 32     | H    | -3.70053900             | 1.25994600  | -0.62736800 |
| 33     | H    | -4.69898300             | 2.72166200  | -0.48224300 |
| 34     | C    | -2.58184900             | 3.07141100  | -0.31349300 |
| 35     | C    | -1.39633500             | 2.53345000  | -0.84730500 |
| 36     | C    | -2.58276600             | 4.42348800  | 0.09200100  |
| 37     | C    | -0.23442600             | 3.31150600  | -0.94907400 |
| 38     | H    | -1.37173900             | 1.49652000  | -1.17940700 |
| 39     | C    | -1.43054200             | 5.19955600  | -0.00922700 |
| 40     | H    | -3.50057500             | 4.86359300  | 0.49353500  |
| 41     | C    | -0.24797700             | 4.63983500  | -0.52296400 |
| 42     | H    | 0.68542500              | 2.86821900  | -1.33421100 |
| 43     | H    | -1.44796200             | 6.24584600  | 0.30737500  |
| 44     | H    | 0.65804800              | 5.24662800  | -0.59761700 |
| 45     | O    | -1.99533800             | -0.73099600 | -0.26853300 |
| 46     | H    | -1.06357100             | -0.57978500 | -0.63398400 |
| 47     | C    | -2.46684900             | -1.96759400 | -0.65657200 |
| 48     | H    | -2.15445800             | -2.26287500 | -1.67587100 |
| 49     | C    | -3.99910000             | -1.88681200 | -0.67641700 |
| 50     | C    | -1.93466100             | -3.06086400 | 0.28804900  |
| 51     | F    | -2.31436300             | -4.28541900 | -0.08345300 |

|    |   |             |             |             |
|----|---|-------------|-------------|-------------|
| 52 | F | -2.35094900 | -2.86237500 | 1.55724800  |
| 53 | F | -0.59422300 | -3.02071400 | 0.30040000  |
| 54 | F | -4.48763800 | -1.46371600 | 0.50474500  |
| 55 | F | -4.56070400 | -3.06692500 | -0.95639000 |
| 56 | F | -4.39164100 | -1.00657400 | -1.60889600 |

---



Int2<sub>B</sub>

| Number | Atom | Coordinates (Angstroms) |             |             |
|--------|------|-------------------------|-------------|-------------|
|        |      | X                       | Y           | Z           |
| 1      | Re   | -2.92033100             | -0.97802200 | -0.00968900 |
| 2      | O    | -3.58707200             | 0.41541400  | 0.79002900  |
| 3      | O    | -1.37149800             | -1.33208400 | 0.73386200  |
| 4      | O    | -3.98725700             | -2.33074800 | 0.08410100  |
| 5      | O    | -2.59306200             | -0.53547700 | -1.66397500 |
| 6      | C    | 0.12416200              | 0.78954500  | -1.08197400 |
| 7      | H    | -0.56435300             | 0.14756100  | -0.53404700 |
| 8      | C    | -0.49007600             | 1.76177300  | -1.99090900 |
| 9      | H    | 0.24108400              | 2.37544400  | -2.53827400 |
| 10     | H    | -1.03557700             | 1.10969300  | -2.70707200 |
| 11     | C    | 1.48085300              | 0.40887600  | -0.94021000 |
| 12     | C    | 1.74479900              | -0.68996400 | -0.07595500 |
| 13     | C    | 2.56466100              | 1.06282100  | -1.58883000 |
| 14     | C    | 3.05205400              | -1.13433200 | 0.11082800  |
| 15     | H    | 0.89689500              | -1.18126800 | 0.41200200  |
| 16     | C    | 3.85764100              | 0.61658800  | -1.39424700 |
| 17     | H    | 2.37441300              | 1.91860300  | -2.23834100 |
| 18     | C    | 4.10599000              | -0.48550900 | -0.54554500 |
| 19     | H    | 3.26188100              | -1.98214800 | 0.76279200  |
| 20     | H    | 4.70756500              | 1.09655500  | -1.88206500 |
| 21     | C    | 5.53566100              | -0.91625000 | -0.37828100 |
| 22     | O    | 6.46690300              | -0.36767600 | -0.91880300 |
| 23     | O    | 5.65826300              | -1.97188700 | 0.43588900  |
| 24     | C    | 6.98804100              | -2.45803900 | 0.64932600  |
| 25     | H    | 6.89421100              | -3.31265000 | 1.32964800  |
| 26     | H    | 7.44217900              | -2.77039000 | -0.30326600 |
| 27     | H    | 7.61866600              | -1.67465000 | 1.09653100  |
| 28     | C    | -1.57313500             | 2.62614300  | -1.30643600 |
| 29     | H    | -2.09935700             | 3.21435200  | -2.07335600 |
| 30     | H    | -2.32266700             | 1.96408500  | -0.84830900 |
| 31     | C    | -0.95872100             | 3.55711700  | -0.24325900 |
| 32     | H    | -0.36316000             | 4.34750000  | -0.72856500 |
| 33     | H    | -1.78476400             | -0.97802200 | 0.29018800  |
| 34     | C    | -0.09782000             | 0.41541400  | 0.73757600  |
| 35     | C    | 1.27455200              | -1.33208400 | 0.88540200  |
| 36     | C    | -0.65583700             | -2.33074800 | 1.50901400  |
| 37     | C    | 2.07270600              | -0.53547700 | 1.73169200  |
| 38     | H    | 1.71731400              | 0.78954500  | 0.30487000  |
| 39     | C    | 0.14582000              | 0.14756100  | 2.36086200  |
| 40     | H    | -1.72386100             | 1.76177300  | 1.43324700  |
| 41     | C    | 1.51098200              | 2.37544400  | 2.46324300  |
| 42     | H    | 3.13981500              | 1.10969300  | 1.81934500  |
| 43     | H    | -0.30372100             | 0.40887600  | 2.91077000  |
| 44     | H    | 2.14406900              | -0.68996400 | 3.11795700  |

## TS3

| Number | Atom | Coordinates (Angstroms) |             |             |
|--------|------|-------------------------|-------------|-------------|
|        |      | X                       | Y           | Z           |
| 1      | Re   | -0.64158400             | -0.84451300 | -0.80696500 |
| 2      | O    | -1.66433800             | 0.55124600  | -0.92417600 |
| 3      | O    | 0.10836300              | -0.85913500 | 0.75562100  |
| 4      | O    | -1.60165500             | -2.27374100 | -1.05132900 |
| 5      | O    | 0.64215300              | -0.66375700 | -1.98514700 |
| 6      | C    | 1.90437300              | 1.33023100  | -1.00048800 |
| 7      | H    | 1.10408200              | 1.14428400  | -0.29117800 |
| 8      | C    | 1.61918000              | 2.20163300  | -2.15841200 |
| 9      | H    | 2.49206400              | 2.84012000  | -2.38140000 |
| 10     | H    | 1.54479800              | 1.49163800  | -3.00684300 |
| 11     | C    | 3.13638800              | 0.69981900  | -0.68505200 |
| 12     | C    | 3.16015100              | -0.16992200 | 0.43909600  |
| 13     | C    | 4.31756000              | 0.87982500  | -1.45411300 |
| 14     | C    | 4.33166500              | -0.83440300 | 0.78156400  |
| 15     | H    | 2.23815200              | -0.32861100 | 1.00388700  |
| 16     | C    | 5.48074100              | 0.21832600  | -1.10257900 |
| 17     | H    | 4.31100100              | 1.53815100  | -2.32421900 |
| 18     | C    | 5.49274700              | -0.63957100 | 0.01660600  |
| 19     | H    | 4.35643000              | -1.51026000 | 1.63621700  |
| 20     | H    | 6.40219300              | 0.33967000  | -1.67429100 |
| 21     | C    | 6.78866400              | -1.32839100 | 0.34277700  |
| 22     | O    | 7.80513000              | -1.17291500 | -0.29148900 |
| 23     | O    | 6.68468500              | -2.12799000 | 1.41042400  |
| 24     | C    | 7.86988900              | -2.83572900 | 1.79211400  |
| 25     | H    | 7.59795600              | -3.43318000 | 2.67016400  |
| 26     | H    | 8.21102700              | -3.48601900 | 0.97243200  |
| 27     | H    | 8.67793300              | -2.13030300 | 2.03851800  |
| 28     | C    | 0.31857800              | 3.00923300  | -2.07261600 |
| 29     | H    | 0.15206800              | 3.50601800  | -3.04135300 |
| 30     | H    | -0.52113400             | 2.31418900  | -1.91878000 |
| 31     | C    | 0.32045000              | 4.06687900  | -0.94495300 |
| 32     | H    | 1.10156200              | 4.82053300  | -1.14073200 |
| 33     | H    | -0.64782000             | 4.59264400  | -0.96617700 |
| 34     | C    | 0.53819800              | 3.43234500  | 0.40677100  |
| 35     | C    | 1.80310300              | 3.46411300  | 1.02562600  |
| 36     | C    | -0.48612600             | 2.67058200  | 1.00556100  |
| 37     | C    | 2.04269000              | 2.74526000  | 2.20473400  |
| 38     | H    | 2.60474400              | 4.06025300  | 0.57989300  |
| 39     | C    | -0.24005000             | 1.93529400  | 2.16256200  |
| 40     | H    | -1.46548000             | 2.60015400  | 0.52892800  |
| 41     | C    | 1.02760000              | 1.97076200  | 2.76594300  |
| 42     | H    | 3.03011500              | 2.78162300  | 2.67176400  |
| 43     | H    | -1.03185600             | 1.30831900  | 2.57504300  |
| 44     | H    | 1.21588900              | 1.38630400  | 3.66960100  |
| 45     | O    | -4.03621600             | -2.21634300 | 0.32059500  |
| 46     | H    | -3.21599800             | -2.41076600 | -0.17475100 |
| 47     | C    | -4.33009700             | -0.86629200 | 0.19158800  |
| 48     | H    | -3.79001800             | -0.36465100 | -0.62739700 |
| 49     | C    | -5.82116600             | -0.72170000 | -0.13607100 |
| 50     | C    | -3.93105000             | -0.10119900 | 1.46829400  |
| 51     | F    | -6.18817300             | 0.57334400  | -0.15525600 |

|    |   |             |             |             |
|----|---|-------------|-------------|-------------|
| 52 | F | -6.06156500 | -1.23124000 | -1.35218400 |
| 53 | F | -6.60212400 | -1.35851200 | 0.73988200  |
| 54 | F | -3.96038600 | 1.22991400  | 1.28029800  |
| 55 | F | -2.67032500 | -0.42579300 | 1.81517700  |
| 56 | F | -4.71907800 | -0.38584100 | 2.51134800  |

---

TS3<sub>B</sub>

| Number | Atom | Coordinates (Angstroms) |             |             |
|--------|------|-------------------------|-------------|-------------|
|        |      | X                       | Y           | Z           |
| 1      | Re   | -2.46250400             | -1.27518400 | 0.02734900  |
| 2      | O    | -3.49519700             | 0.11581500  | 0.18269400  |
| 3      | O    | -1.23952600             | -1.17556400 | 1.27053400  |
| 4      | O    | -3.36354400             | -2.73864300 | 0.15689800  |
| 5      | O    | -1.63746800             | -1.16572800 | -1.51572800 |
| 6      | C    | -0.03572300             | 0.93613000  | -1.03762000 |
| 7      | H    | -0.67077600             | 0.63018000  | -0.21674600 |
| 8      | C    | -0.67630700             | 1.68247200  | -2.12871700 |
| 9      | H    | 0.04612400              | 2.26567600  | -2.72192800 |
| 10     | H    | -1.05509400             | 0.86605400  | -2.78003900 |
| 11     | C    | 1.30742100              | 0.50716500  | -0.90906500 |
| 12     | C    | 1.61336200              | -0.32011900 | 0.20715500  |
| 13     | C    | 2.33822400              | 0.86851000  | -1.81911600 |
| 14     | C    | 2.91630500              | -0.76885500 | 0.40242400  |
| 15     | H    | 0.80304500              | -0.61900200 | 0.88013200  |
| 16     | C    | 3.63011900              | 0.42355400  | -1.61067500 |
| 17     | H    | 2.11253700              | 1.50392900  | -2.67698300 |
| 18     | C    | 3.92397900              | -0.39514600 | -0.49817000 |
| 19     | H    | 3.15990400              | -1.41037900 | 1.24913600  |
| 20     | H    | 4.44292400              | 0.68894100  | -2.28860200 |
| 21     | C    | 5.34940700              | -0.84125300 | -0.33064500 |
| 22     | O    | 6.24096600              | -0.52795400 | -1.08375600 |
| 23     | O    | 5.51632500              | -1.62100500 | 0.74443400  |
| 24     | C    | 6.84403400              | -2.10228000 | 0.97963600  |
| 25     | H    | 6.78906700              | -2.71643500 | 1.88616800  |
| 26     | H    | 7.19335000              | -2.70322500 | 0.12635100  |
| 27     | H    | 7.53993700              | -1.26168700 | 1.12300000  |
| 28     | C    | -1.88437700             | 2.51347500  | -1.66711100 |
| 29     | H    | -2.39345900             | 2.93174300  | -2.54908300 |
| 30     | H    | -2.60260400             | 1.84102200  | -1.17077200 |
| 31     | C    | -1.48056300             | 3.65183500  | -0.70507200 |
| 32     | H    | -0.88551600             | 4.40623600  | -1.24590800 |
| 33     | H    | -2.40004200             | 4.15487000  | -0.36197100 |
| 34     | C    | -0.69773800             | 3.14304100  | 0.48253800  |
| 35     | C    | 0.67004100              | 3.44269400  | 0.63741400  |
| 36     | C    | -1.31206300             | 2.29125600  | 1.42903000  |
| 37     | C    | 1.40973200              | 2.89484100  | 1.68767600  |
| 38     | H    | 1.15806600              | 4.10391800  | -0.08433000 |
| 39     | C    | -0.56970000             | 1.72938100  | 2.46536400  |
| 40     | H    | -2.36214500             | 2.01247800  | 1.30695800  |
| 41     | C    | 0.79428500              | 2.02776300  | 2.59616300  |
| 42     | H    | 2.47188200              | 3.13153500  | 1.78750800  |
| 43     | H    | -1.04970900             | 1.02964300  | 3.15121800  |
| 44     | H    | 1.37522500              | 1.58113800  | 3.40686000  |

TS4<sub>B</sub>

| Number | Atom | Coordinates (Angstroms) |             |             |
|--------|------|-------------------------|-------------|-------------|
|        |      | X                       | Y           | Z           |
| 1      | Re   | 0.41029200              | 2.16986500  | -0.25869100 |
| 2      | O    | 1.74567600              | 1.52107700  | 0.69322100  |
| 3      | O    | 0.90569000              | 3.57719600  | -1.12310600 |
| 4      | O    | -0.06150300             | 0.90920700  | -1.36542000 |
| 5      | O    | -0.91271700             | 2.53595300  | 0.79930900  |
| 6      | C    | 1.10026600              | -1.95255100 | 1.17842200  |
| 7      | H    | 1.37986800              | -2.99960900 | 1.01335600  |
| 8      | C    | 1.86168000              | -1.25637400 | 2.27082600  |
| 9      | H    | 1.69788100              | -0.16968800 | 2.20195800  |
| 10     | H    | 1.39007200              | -1.60004000 | 3.21227000  |
| 11     | C    | -0.32264400             | -1.68797600 | 0.97549500  |
| 12     | C    | -1.11033300             | -2.63072600 | 0.27497000  |
| 13     | C    | -0.93357900             | -0.50829200 | 1.44414500  |
| 14     | C    | -2.45688300             | -2.39543700 | 0.04260600  |
| 15     | H    | -0.64427100             | -3.54504800 | -0.10188900 |
| 16     | C    | -2.28203400             | -0.26406500 | 1.20300100  |
| 17     | H    | -0.35546700             | 0.24568500  | 1.97503900  |
| 18     | C    | -3.04914800             | -1.20245300 | 0.50202200  |
| 19     | H    | -3.06359200             | -3.11945600 | -0.50146300 |
| 20     | H    | -2.73187700             | 0.67674300  | 1.52135500  |
| 21     | C    | -4.49362800             | -0.88867200 | 0.25956700  |
| 22     | O    | -5.06149500             | 0.08041200  | 0.70160800  |
| 23     | O    | -5.09557300             | -1.81490700 | -0.50980100 |
| 24     | C    | -6.47616900             | -1.58599200 | -0.79869900 |
| 25     | H    | -6.80016500             | -2.42255500 | -1.42995100 |
| 26     | H    | -7.06822400             | -1.55165700 | 0.12896100  |
| 27     | H    | -6.60880100             | -0.63021400 | -1.32856200 |
| 28     | C    | 3.35754400              | -1.55622300 | 2.30725000  |
| 29     | H    | 3.81078900              | -1.05511300 | 3.17613500  |
| 30     | H    | 3.52887900              | -2.63981900 | 2.43236200  |
| 31     | C    | 4.05992000              | -1.07005700 | 1.01385000  |
| 32     | H    | 3.95148800              | 0.02431800  | 0.94825300  |
| 33     | H    | 5.12972500              | -1.32513500 | 1.04766400  |
| 34     | C    | 3.39160500              | -1.70146800 | -0.16585800 |
| 35     | C    | 2.07688500              | -1.24408100 | -0.50492500 |
| 36     | C    | 3.92697500              | -2.79018100 | -0.86007200 |
| 37     | C    | 1.39227300              | -1.81391200 | -1.61975900 |
| 38     | H    | 1.81701600              | -0.22222400 | -0.20016700 |
| 39     | C    | 3.21179600              | -3.36914500 | -1.91340900 |
| 40     | H    | 4.91311200              | -3.17692200 | -0.59092700 |
| 41     | C    | 1.94850700              | -2.87846700 | -2.30501900 |
| 42     | H    | 0.42859400              | -1.37863900 | -1.89158300 |
| 43     | H    | 3.64695100              | -4.21591600 | -2.45185600 |
| 44     | H    | 1.42732900              | -3.32966400 | -3.15210400 |

2v

| Number | Atom | Coordinates (Angstroms) |             |             |
|--------|------|-------------------------|-------------|-------------|
|        |      | X                       | Y           | Z           |
| 1      | C    | 1.42975800              | -0.93109600 | -0.59684000 |
| 2      | H    | 1.52603000              | -1.19622200 | -1.66590900 |
| 3      | C    | 1.82065000              | -2.18603100 | 0.21159500  |
| 4      | H    | 1.53811100              | -2.03856800 | 1.26914000  |
| 5      | H    | 1.23290500              | -3.04422200 | -0.15143100 |
| 6      | C    | -0.02847100             | -0.58068700 | -0.35174400 |
| 7      | C    | -1.01181400             | -0.88270300 | -1.30475700 |
| 8      | C    | -0.43088400             | 0.00987600  | 0.85969300  |
| 9      | C    | -2.35927000             | -0.60724300 | -1.06394000 |
| 10     | H    | -0.71664400             | -1.33929200 | -2.25378600 |
| 11     | C    | -1.77129500             | 0.28677700  | 1.10905200  |
| 12     | H    | 0.32448300              | 0.26502100  | 1.60726400  |
| 13     | C    | -2.74932100             | -0.01976900 | 0.14800700  |
| 14     | H    | -3.11521900             | -0.84337400 | -1.81383400 |
| 15     | H    | -2.08872100             | 0.74690500  | 2.04687500  |
| 16     | C    | -4.17059300             | 0.30081300  | 0.46501300  |
| 17     | O    | -4.54768500             | 0.80670100  | 1.49782600  |
| 18     | O    | -5.01344100             | -0.03605900 | -0.53349400 |
| 19     | C    | -6.39407400             | 0.23910400  | -0.30572300 |
| 20     | H    | -6.92663100             | -0.09326300 | -1.20573700 |
| 21     | H    | -6.76199000             | -0.30368400 | 0.57910900  |
| 22     | H    | -6.55786800             | 1.31543600  | -0.13961100 |
| 23     | C    | 3.32121500              | -2.45551300 | 0.12219600  |
| 24     | H    | 3.57590100              | -3.40449600 | 0.62126800  |
| 25     | H    | 3.61358600              | -2.56437300 | -0.93777600 |
| 26     | C    | 4.09475700              | -1.29943400 | 0.75714300  |
| 27     | H    | 3.95428800              | -1.33311700 | 1.85427300  |
| 28     | H    | 5.17853000              | -1.41413100 | 0.59033300  |
| 29     | C    | 3.64449100              | 0.05849100  | 0.25177800  |
| 30     | C    | 2.38514600              | 0.24100100  | -0.35557400 |
| 31     | C    | 4.49430700              | 1.16739100  | 0.40498200  |
| 32     | C    | 2.02588800              | 1.52441700  | -0.80366700 |
| 33     | C    | 4.12329100              | 2.43685000  | -0.03437300 |
| 34     | H    | 5.47016100              | 1.02185400  | 0.87845500  |
| 35     | C    | 2.87855700              | 2.61567900  | -0.64748400 |
| 36     | H    | 1.05173200              | 1.66644200  | -1.27841900 |
| 37     | H    | 4.80278700              | 3.28311600  | 0.09573900  |
| 38     | H    | 2.57354600              | 3.60329900  | -1.00275500 |

### 13 References

- [1] S. T. Right, J. M. Coxon, P. J. Steel, Reactions of 2-phenylethyl and 3-phenylpropyl carbinols with fluorosulfuric acid, *J. Org. Chem.* 1990, **55**, 1338.
- [2] S. R. Angle, M. S. Louie, A systematic study of benzyl cation initiated cyclization reactions, *J. Org. Chem.* 1991, **56**, 2853.
- [3] J. Barrios-Rivera, Y. Xu, M. Wills, Probing the Effects of Heterocyclic Functionality in [(Benzene)Ru(TsDPENR)Cl] Catalysts for Asymmetric Transfer Hydrogenation, *Organic Letters*. 2019, **21**, 7223.
- [4] J. D. Nguyen, B. S. Matsuura, C. R. Stephenson, Hydrogen Evolution from Neutral Water under Aerobic Conditions Catalyzed by Cobalt Microperoxidase-11, *J. Am. Chem. Soc.* 2014, **136**, 4, 1218.
- [5] RA. Bunce, NR. Cain, JG. Cooper, Tetrahydroisoquinolines by Friedel-Crafts Cyclizations Promoted by Iron(III) Chloride Hexahydrate, *Preparations and Procedures International*. 2012, **44**, 131.
- [6] V. D. Vuković, E. Richmond, E. Wolf, J. Moran, Catalytic Friedel–Crafts Reactions of Highly Electronically Deactivated Benzylic Alcohols, *Angew. Chem. Int. Ed.* 2017, **56**, 3085.
- [7] Q. Qin, Y. Xie, P. E. Floreancig, Diarylmethane Synthesis through Re<sub>2</sub>O<sub>7</sub>-Catalyzed Bimolecular Dehydrative Friedel-Crafts Reactions, *Chem. Sci.* 2018, **9**, 8528.
- [8] S. Liu, M. Fang, D. Yin, Y. Wang, L. Liu, X. Li, G. Che, Synthesis of 1-aryl- benzocycloalkane derivatives via one-pot two-step reaction of benzocyclonone, tosylhydrazide, and arylboronic acid, *Synthetic Commun.* 2019, **49**, 942.
- [9] H. Duan, L. Meng, D. Bao, H. Zhang, Y. Li, A. Lei, Zinc Chloride Enhanced Arylations of Secondary Benzyl Trifluoroacetates in the Presence of  $\beta$ -Hydrogen Atoms, *Angew. Chem. Int. Ed.* 2010, **49**, 6387.
- [10] R. R. Cesati, J. Armas, A. H. Hoveyda, Olefins Turned Alkylating Agents: Diastereoselective Intramolecular Zr-Catalyzed Olefin Alkylations, *Org. Lett.* 2002, **4**, 395
- [11] A. Gopi, K. Reddy, G. Satyanarayana, Metal-Free Domino One-Pot Decarboxylative Cyclization of Cinnamic Acid Esters: Synthesis of Functionalized Indanes, *J. Org. Chem.* 2016, **81**, 12212.
- [12] K. E. Poremba, N. T. Kadunce, N. Suzuki, A. H. Cherney, S. E. Reisman, 1.Nickel-Catalyzed Asymmetric Reductive Cross-Coupling To Access 1,1-Diaryllkanes, *J. Am. Chem. Soc.* 2017, **139**, 5684.
- [13] S. J. Pastine, S. W. Youn, D. Sames, 1.Pt(IV)-Catalyzed Cyclization of Arene–Alkyne Substrates via Intramolecular Electrophilic Hydroarylation, *Organic Letters*. 2003, **5**, 1055.
- [14] .A. Gopi, K. Reddy, G. Satyanarayana, Metal-Free Domino One-Pot Decarboxylative Cyclization of Cinnamic Acid Esters: Synthesis of Functionalized Indanes, *J. Org. Chem.* 2016, **81**, 12212.
- [15] S. Xing, J. Ren, K. Wang, H. Cui, W. R. Li, H. Yan, Lewis acid promoted three-component reactions of aziridines, arenes and aldehydes: an efficient and diastereoselective synthesis of *cis*-1,4-disubstituted tetrahydroisoquinolines, *Tetrahedron*. 2015, **71**, 6290.
- [16] H. Fang, M. Oestreich, 1.Reductive Deamination with Hydrosilanes Catalyzed by B(C<sub>6</sub>F<sub>5</sub>)<sub>3</sub>, *Angewandte Chemie International Edition*. 2020. **59**, 11394.

- [17] P. J. Kropp, G. W. Breton, S. D. Jones III, J. S. Raleigh, Surface-Mediated Reactions. 6. Effects of Silica Gel and Alumina on Acid-Catalyzed Reactions, *J. Org. Chem.* 1995, **60**, 4146.
- [18] W. S. Murphy, S. J. Wattanasin, Reductive cleavage of arylcyclopropyl ketones, *Chem. Soc. Perkin Trans.* 1986, **1**, 1445–1451.
- [19] Y. Yu, Q. Lu, G. Chen, C. Li, X. Huang, Palladium-Catalyzed Intermolecular Acylation of Aryl Diazoesters with ortho-Bromobenzaldehydes, *Angew. Chem. Int. Ed.* 2018, **57**, 319.
- [20] E. Rasolofonjatovo, O. Provot, A. Hamze, J. Rodrigo, J. Bignon, J. Wdzieczak-Bakala, D. Desravines, J. Dubois, J.-D. Brion, M. Alami, Conformationally restricted naphthalene derivatives type isocombretastatin A-4 and isoerianin analogues: Synthesis, cytotoxicity and antitubulin activity, *Eur. J. Med. Chem.* 2012, **52**, 22.
- [21] A. D. Becke, Density-functional thermochemistry. III. The role of exact exchange, *J. Chem. Phys.* 1993, **98**, 5648.
- [22] S. Grimme, J. Antony, S. Ehrlich, H. Krieg, A consistent and accurate ab initio parametrization of density functional dispersion correction (DFT-D) for the 94 elements H-Pu, *J. Chem. Phys.* 2010, **132**, 154104.
- [23] Gaussian 16, Revision A.03, M. J. Frisch, G. W. Trucks, H. B. Schlegel, G. E. Scuseria, M. A. Robb, J. R. Cheeseman, G. Scalmani, V. Barone, G. A. Petersson, H. Nakatsuji, X. Li, M. Caricato, A. V. Marenich, J. Bloino, B. G. Janesko, R. Gomperts, B. Mennucci, H. P. Hratchian, J. V. Ortiz, A. F. Izmaylov, J. L. Sonnenberg, D. Williams-Young, F. Ding, F. Lipparini, F. Egidi, J. Goings, B. Peng, A. Petrone, T. Henderson, D. Ranasinghe, V. G. Zakrzewski, J. Gao, N. Rega, G. Zheng, W. Liang, M. Hada, M. Ehara, K. Toyota, R. Fukuda, J. Hasegawa, M. Ishida, T. Nakajima, Y. Honda, O. Kitao, H. Nakai, T. Vreven, K. Throssell, J. A. Montgomery, Jr., J. E. Peralta, F. Ogliaro, M. J. Bearpark, J. J. Heyd, E. N. Brothers, K. N. Kudin, V. N. Staroverov, T. A. Keith, R. Kobayashi, J. Normand, K. Raghavachari, A. P. Rendell, J. C. Burant, S. S. Iyengar, J. Tomasi, M. Cossi, J. M. Millam, M. Klene, C. Adamo, R. Cammi, J. W. Ochterski, R. L. Martin, K. Morokuma, O. Farkas, J. B. Foresman, and D. J. Fox, Gaussian, Inc., Wallingford CT, 2016.
- [24] D. Andrae, U. Haeussermann, M. Dolg, H. Stoll, H. Preuß, Energy-adjusted ab initio pseudopotentials for the second and third row transition elements: molecular test for  $M_2$  ( $M = Ag, Au$ ) and  $MH$  ( $M = Ru, Os$ ), *Theor. Chim. Acta* 1990, **77**, 123.
- [25] A. V. Marenich, C. J. Cramer, D. G. Truhlar, Universal Solvation Model Based on Solute Electron Density and on a Continuum Model of the Solvent Defined by the Bulk Dielectric Constant and Atomic Surface Tensions, *J. Phys. Chem. B* 2009, **113**, 6378.



### 14 NMR spectroscopic data

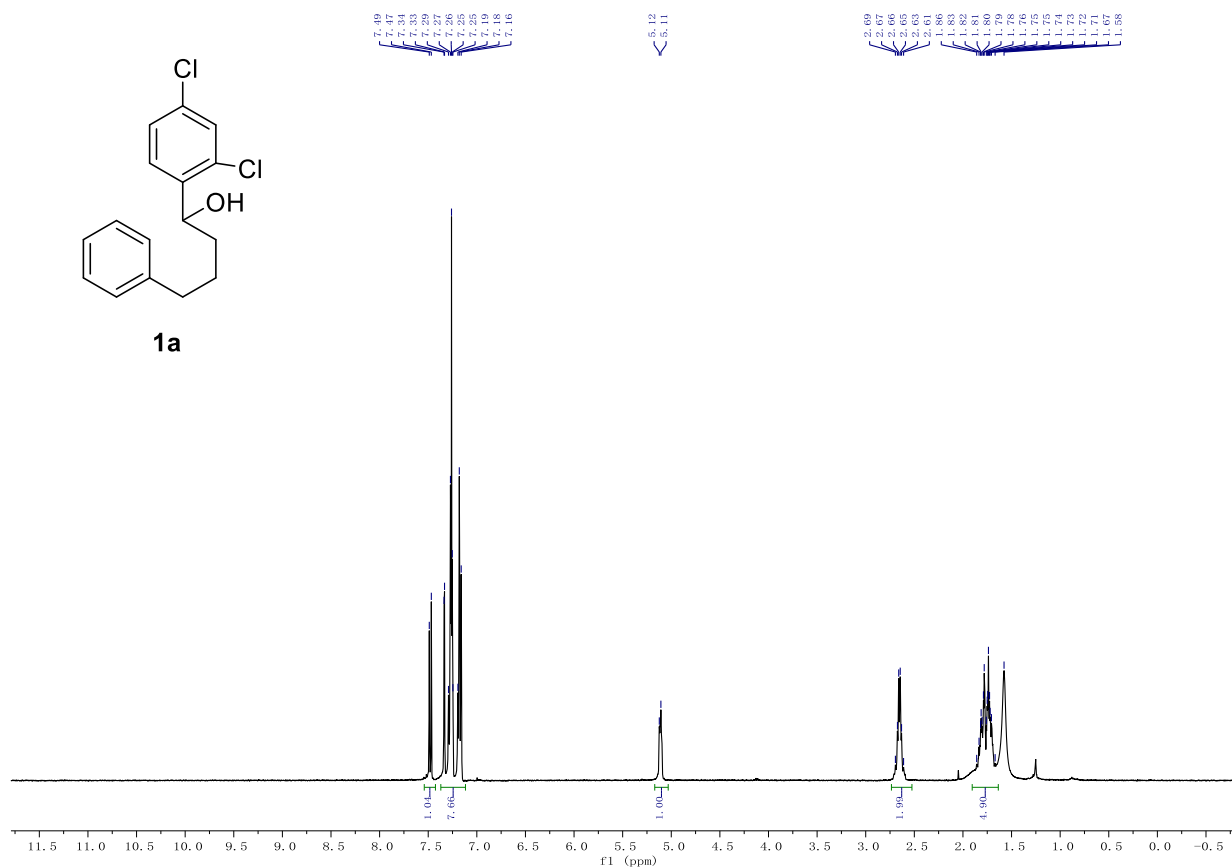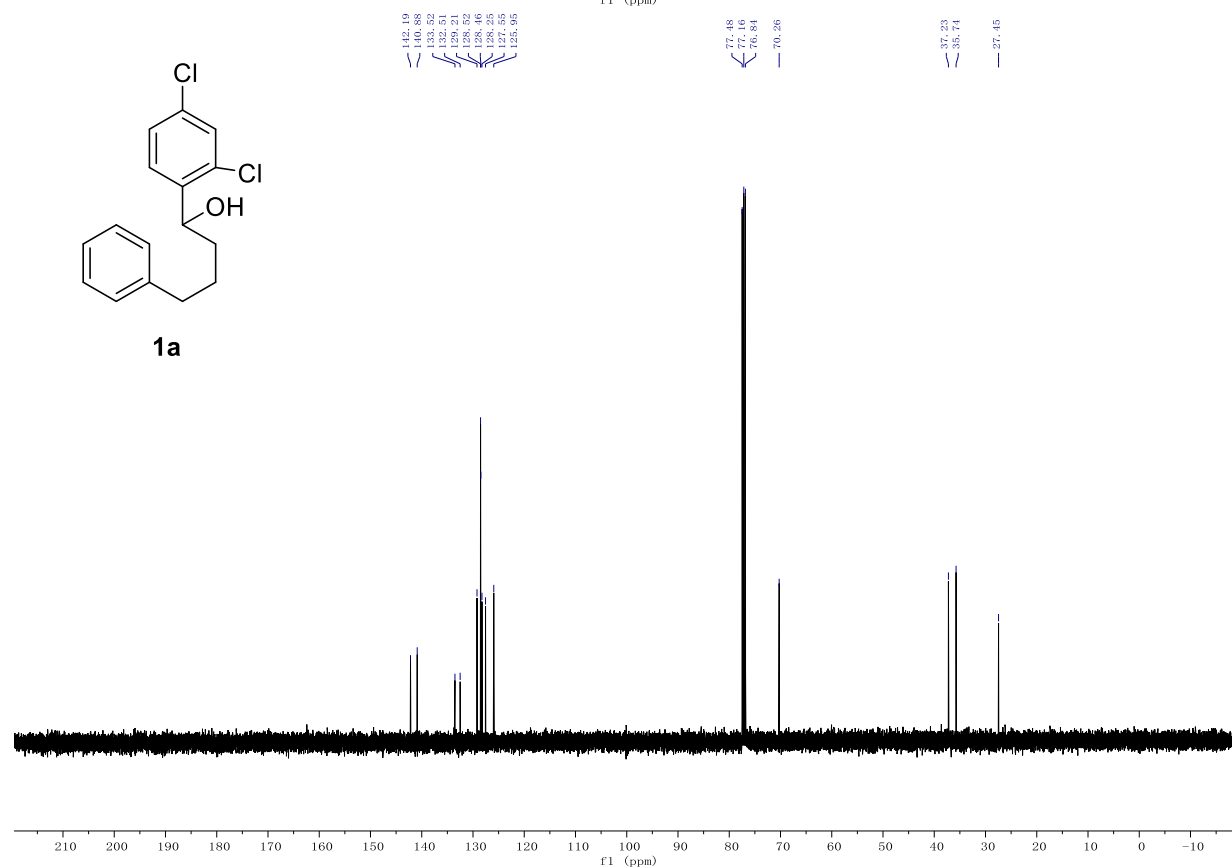

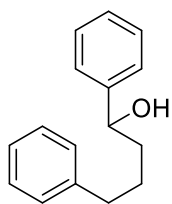

1b

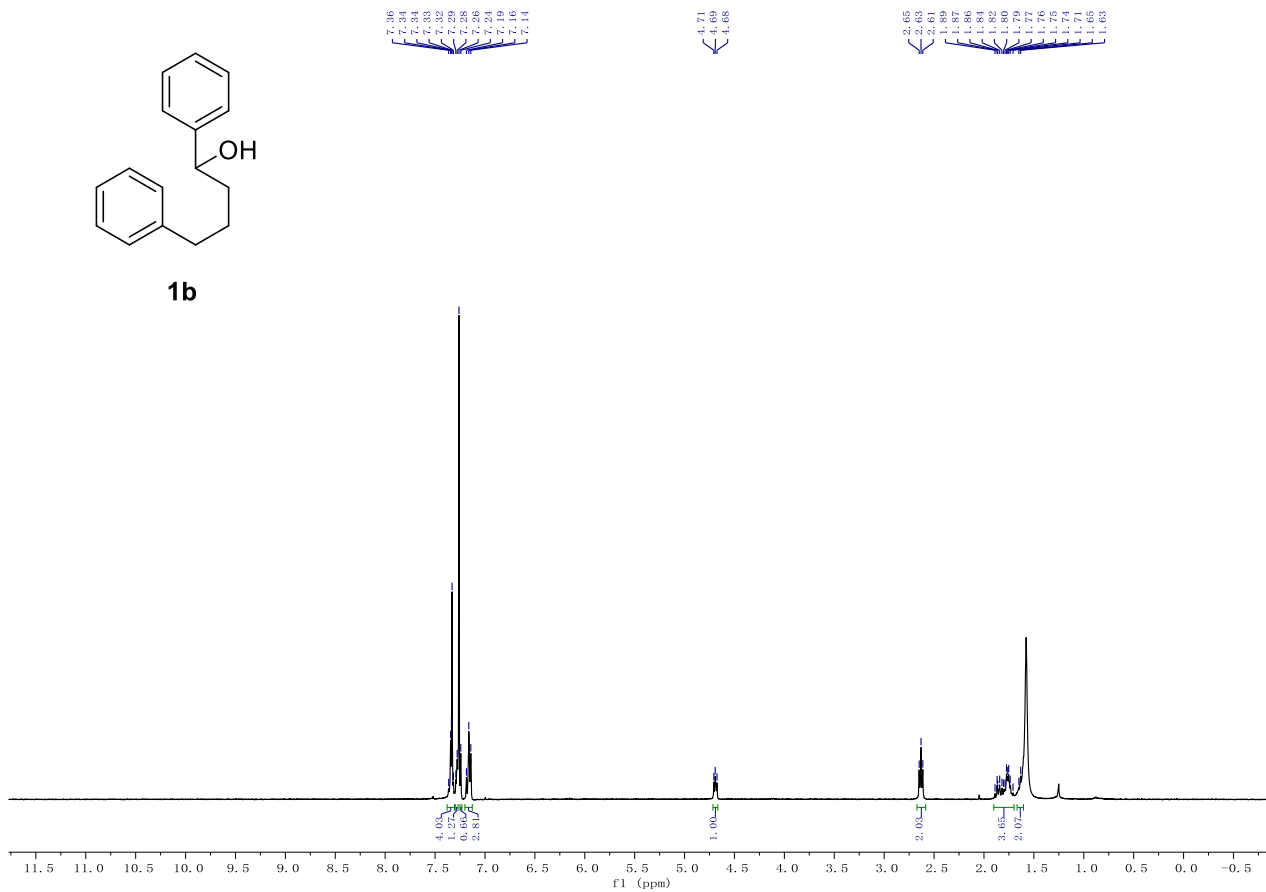

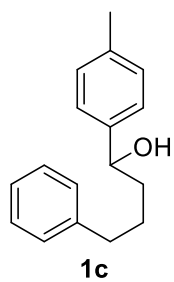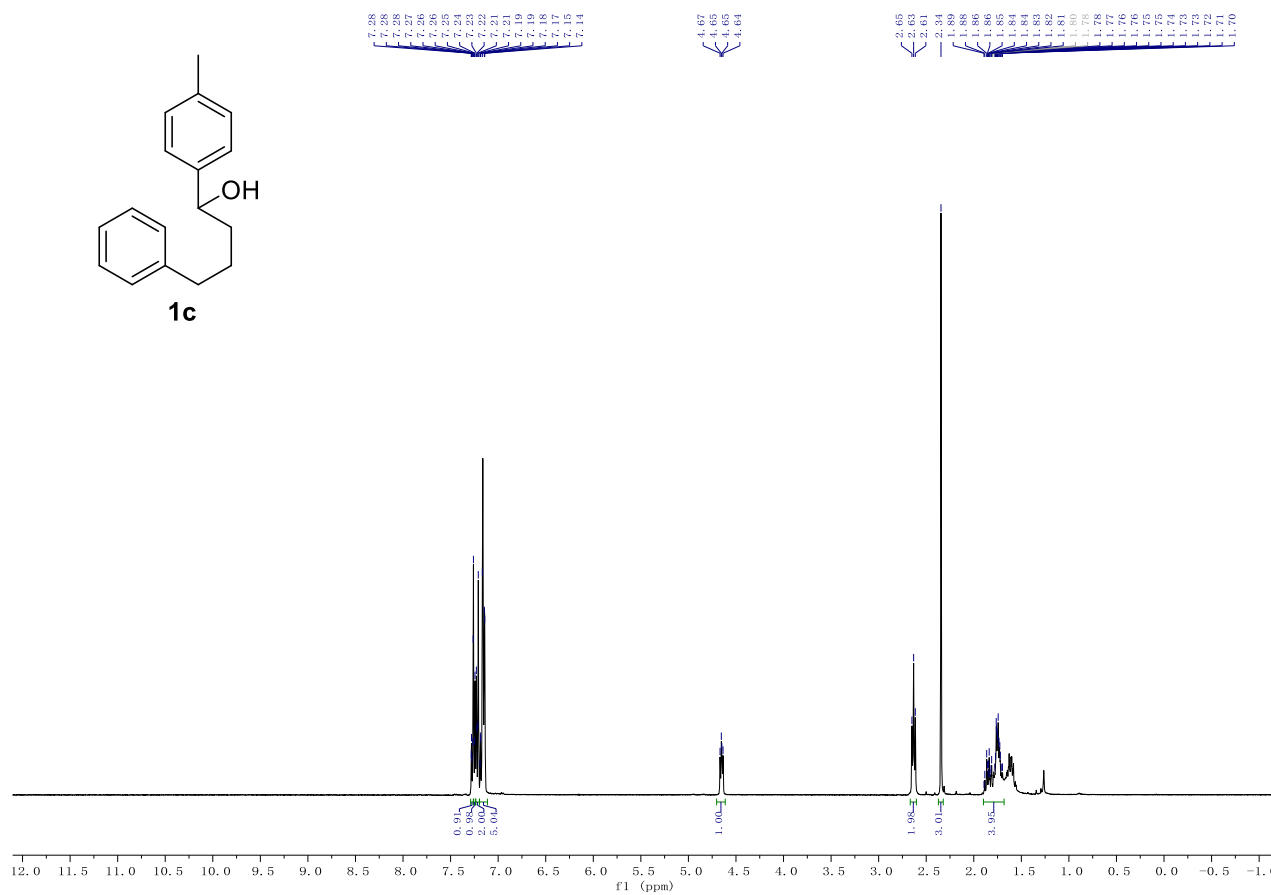

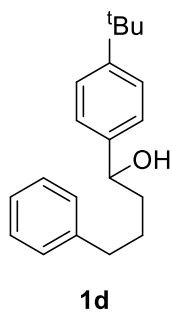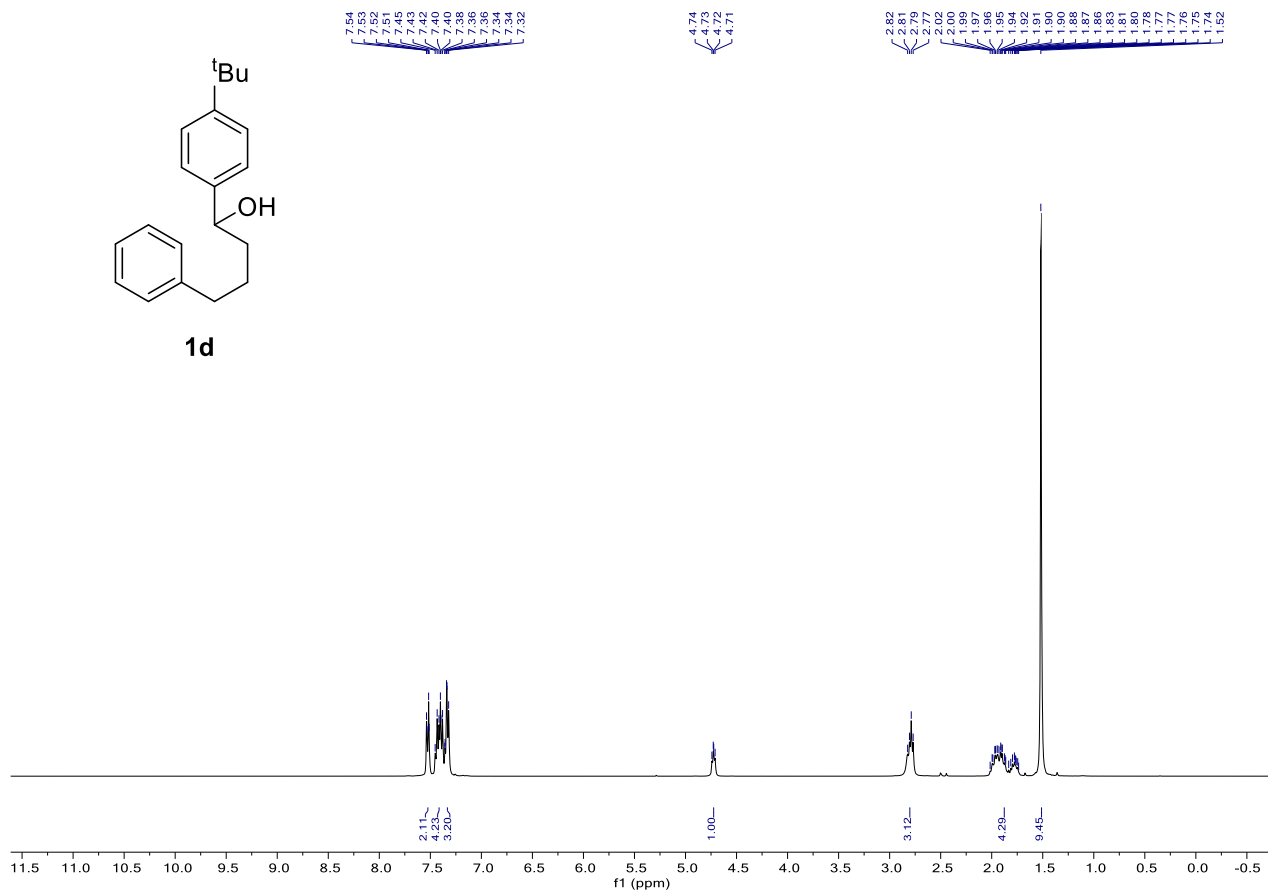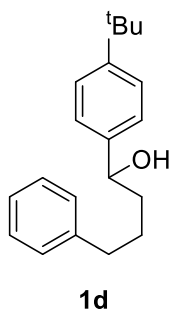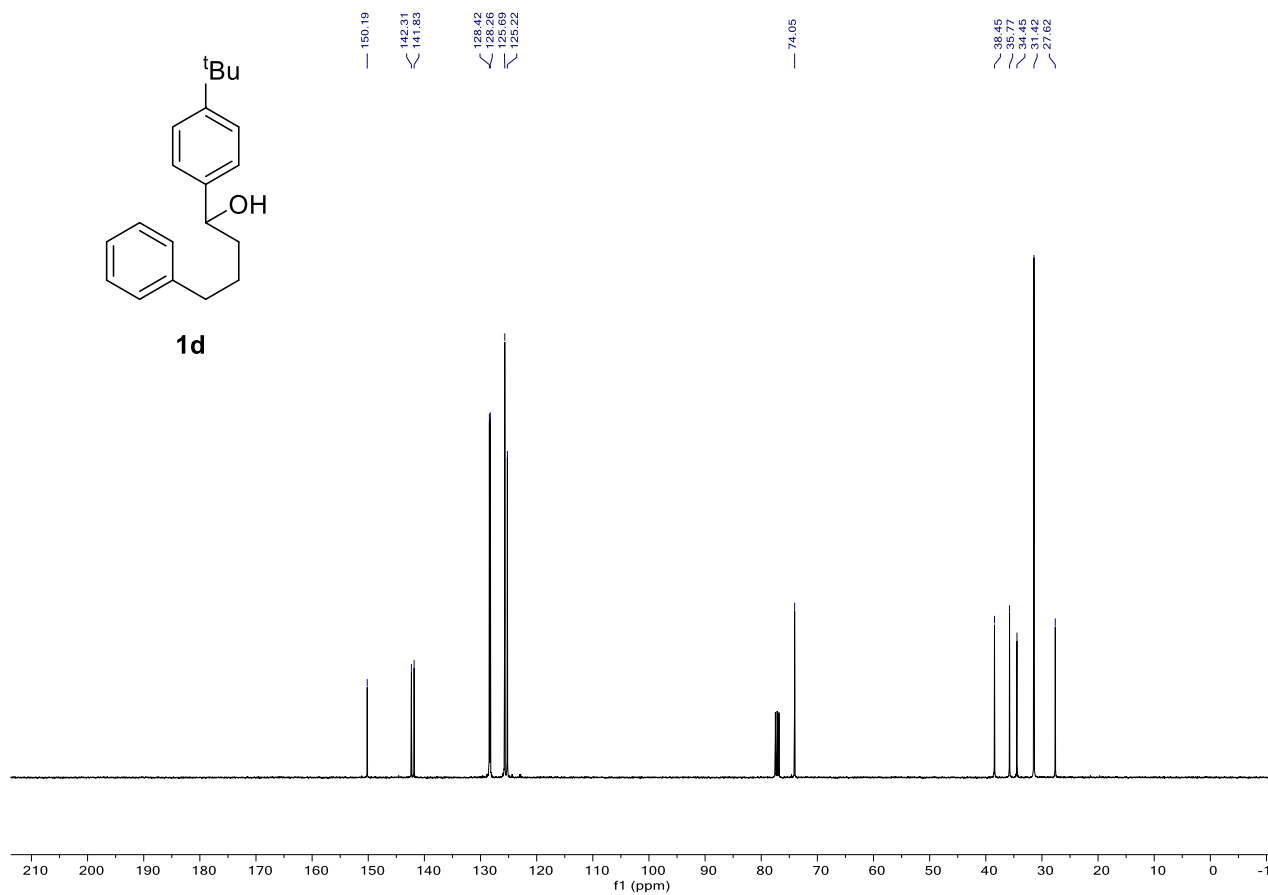

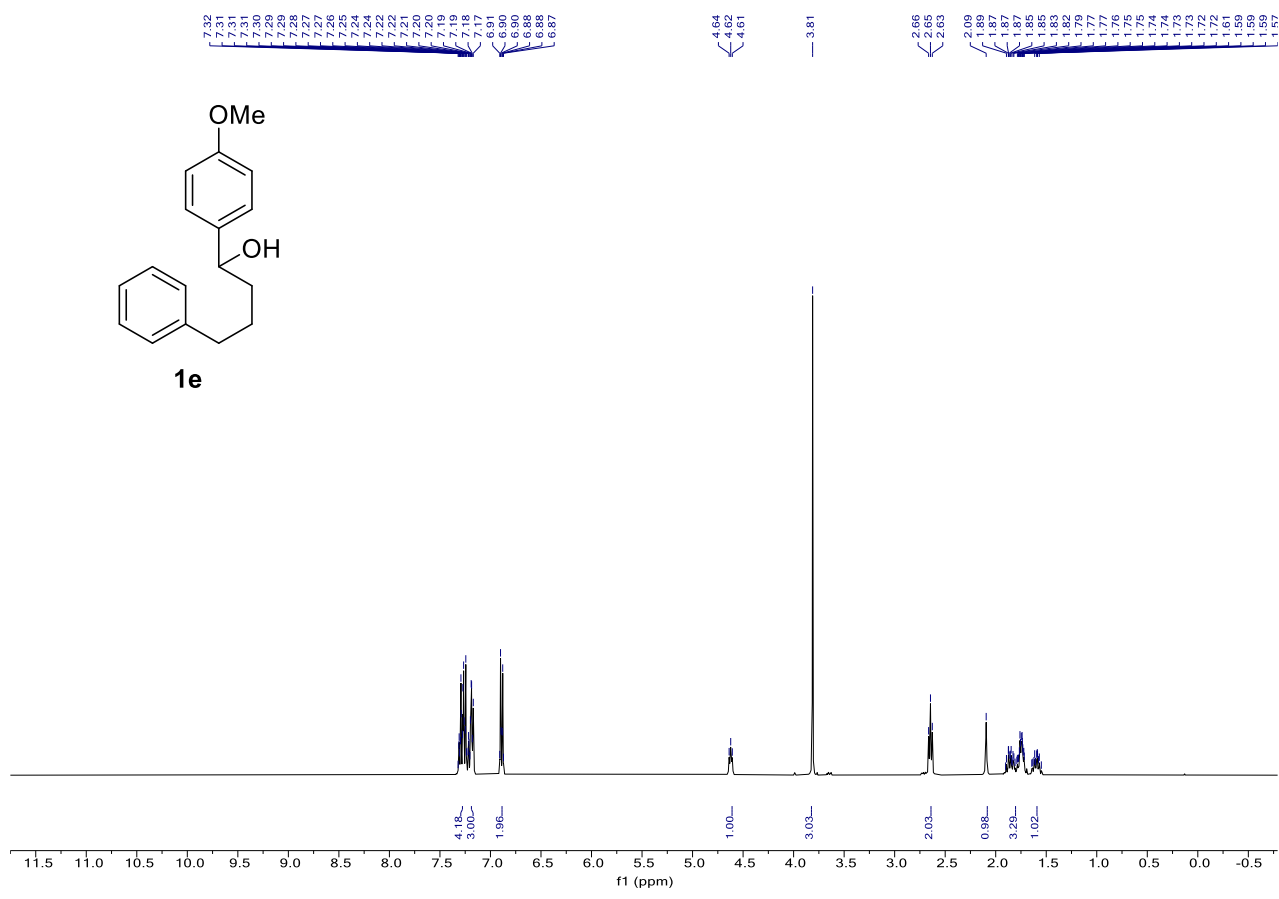

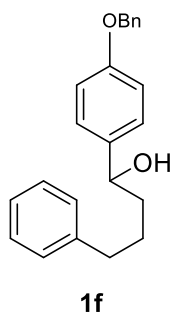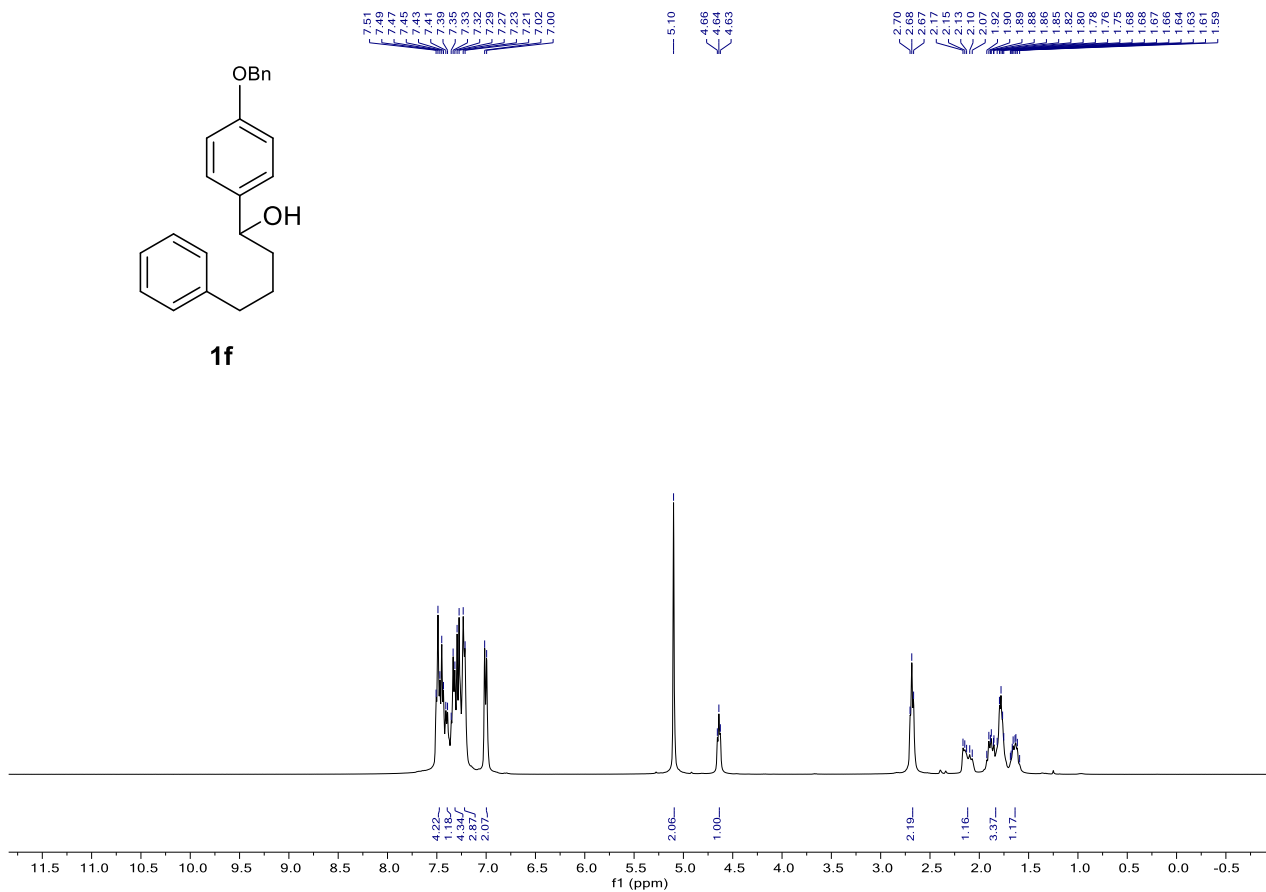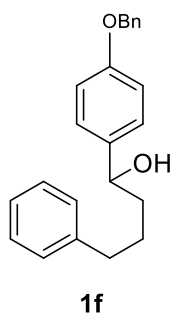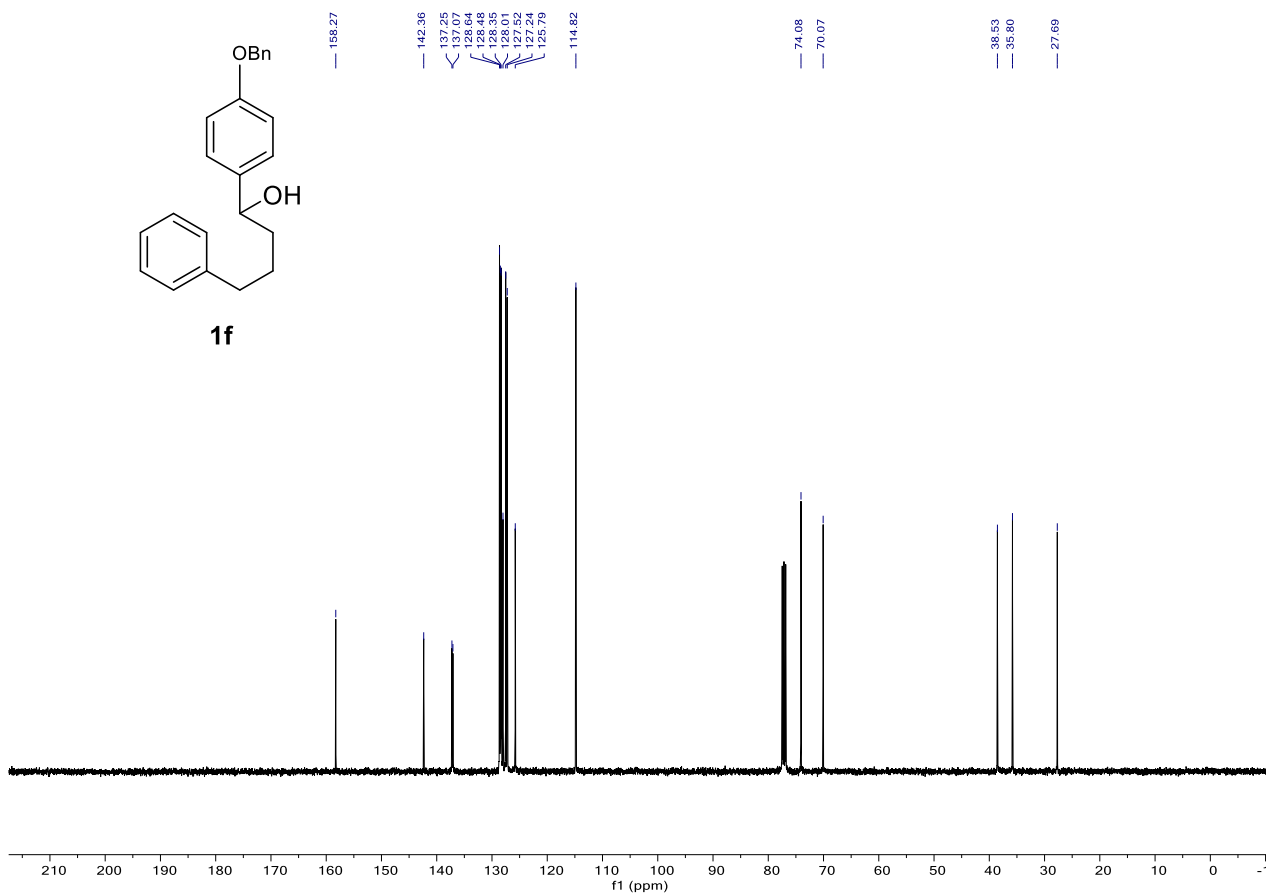

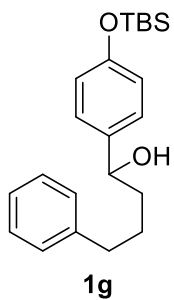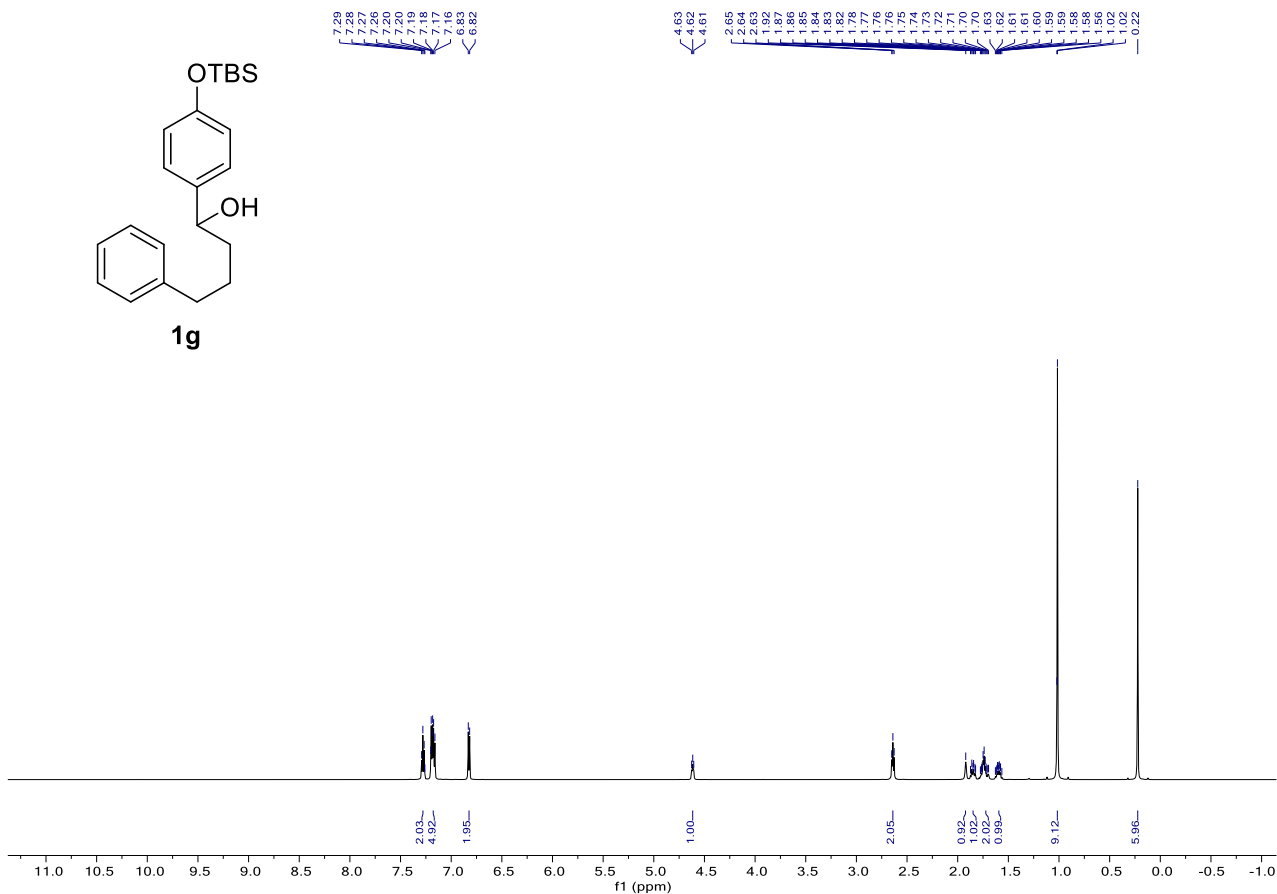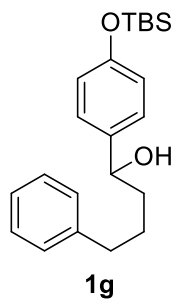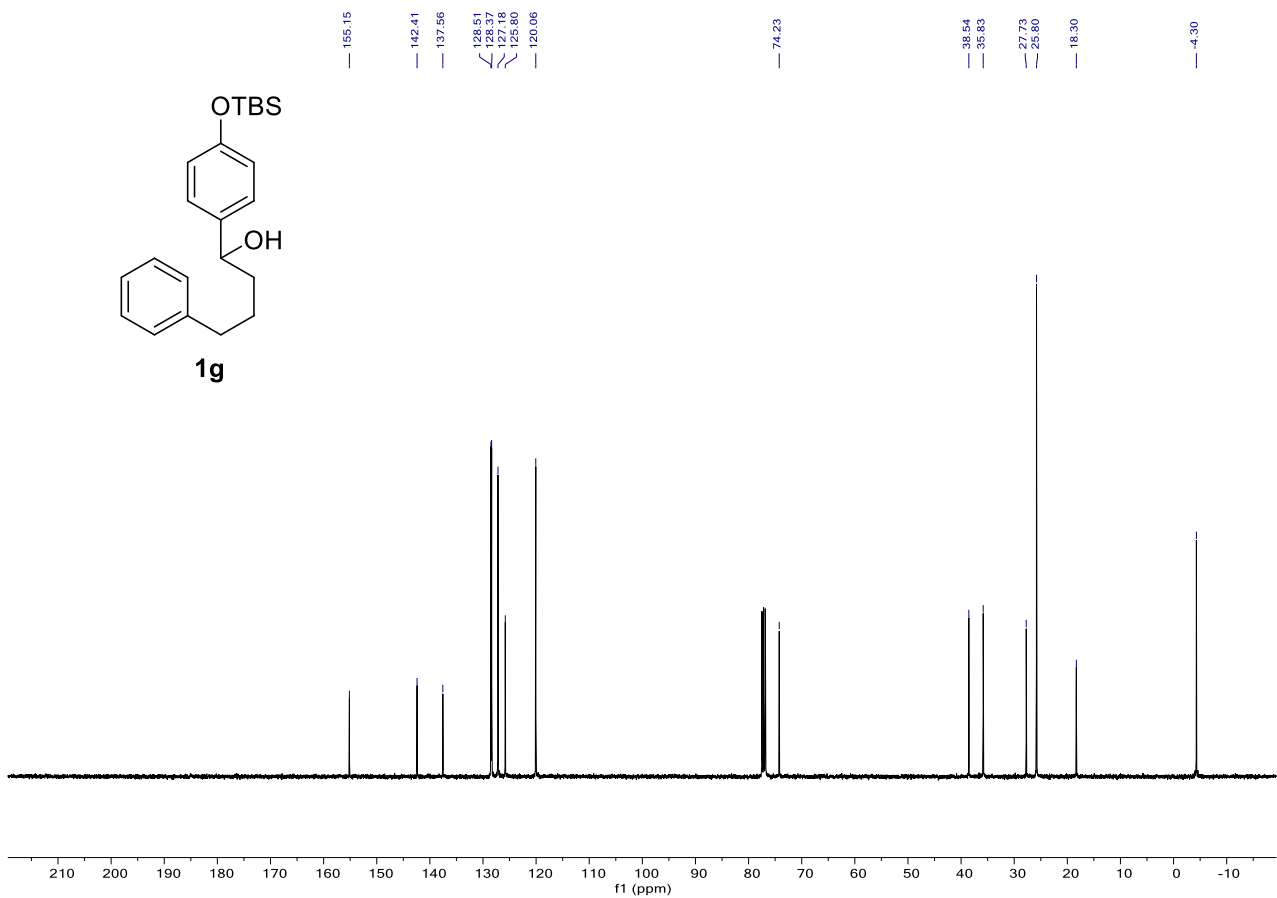

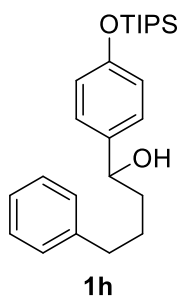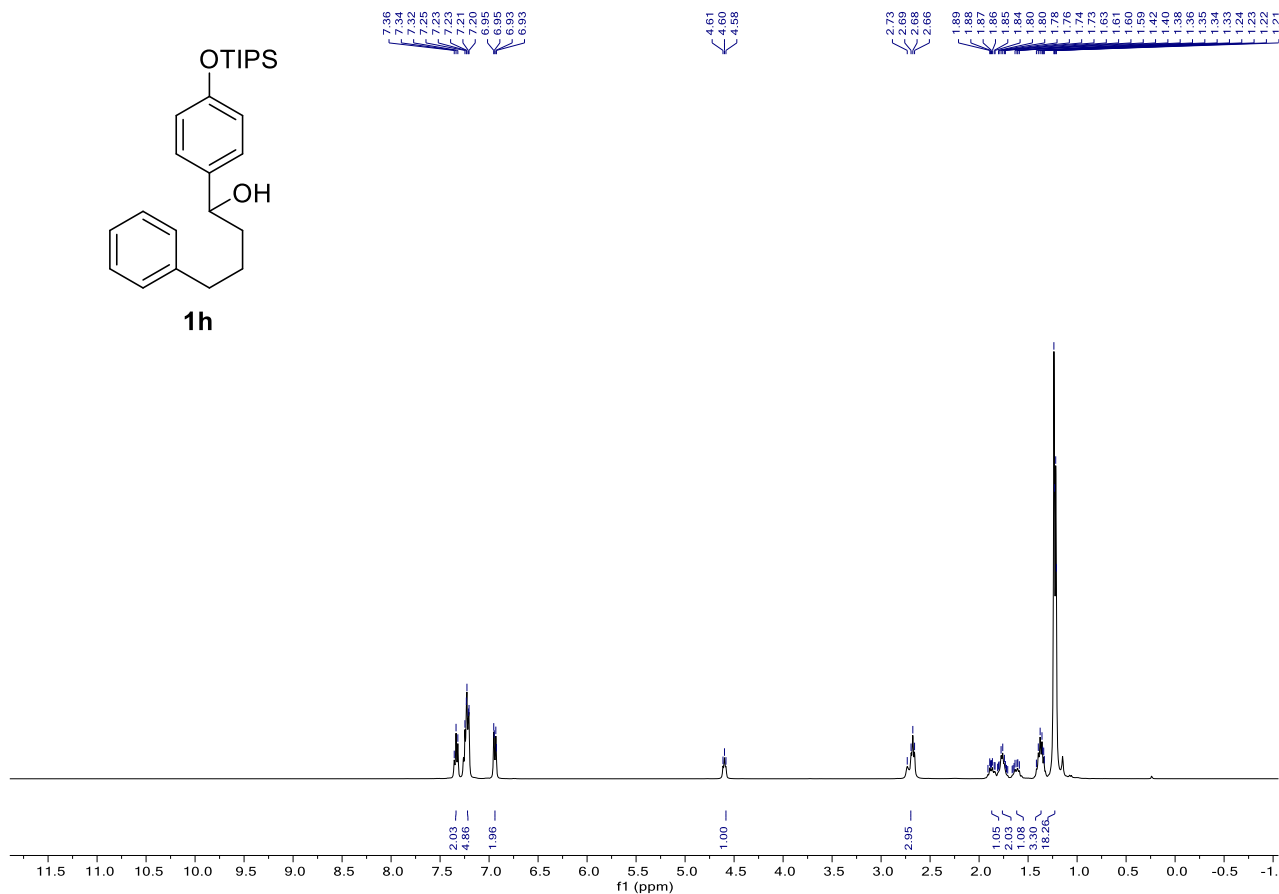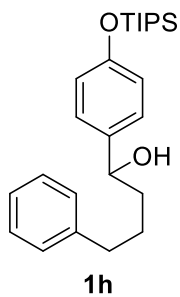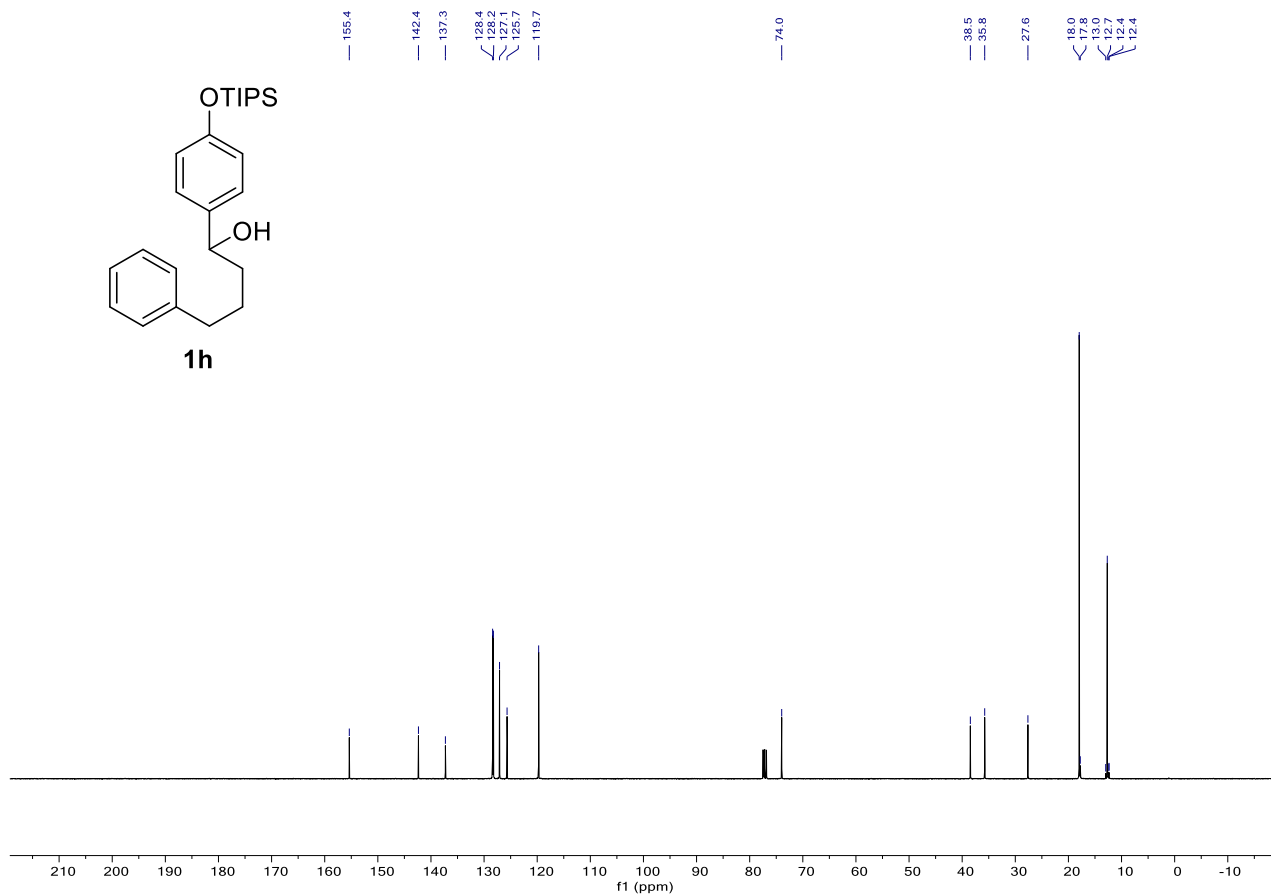



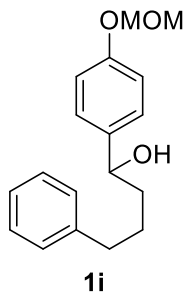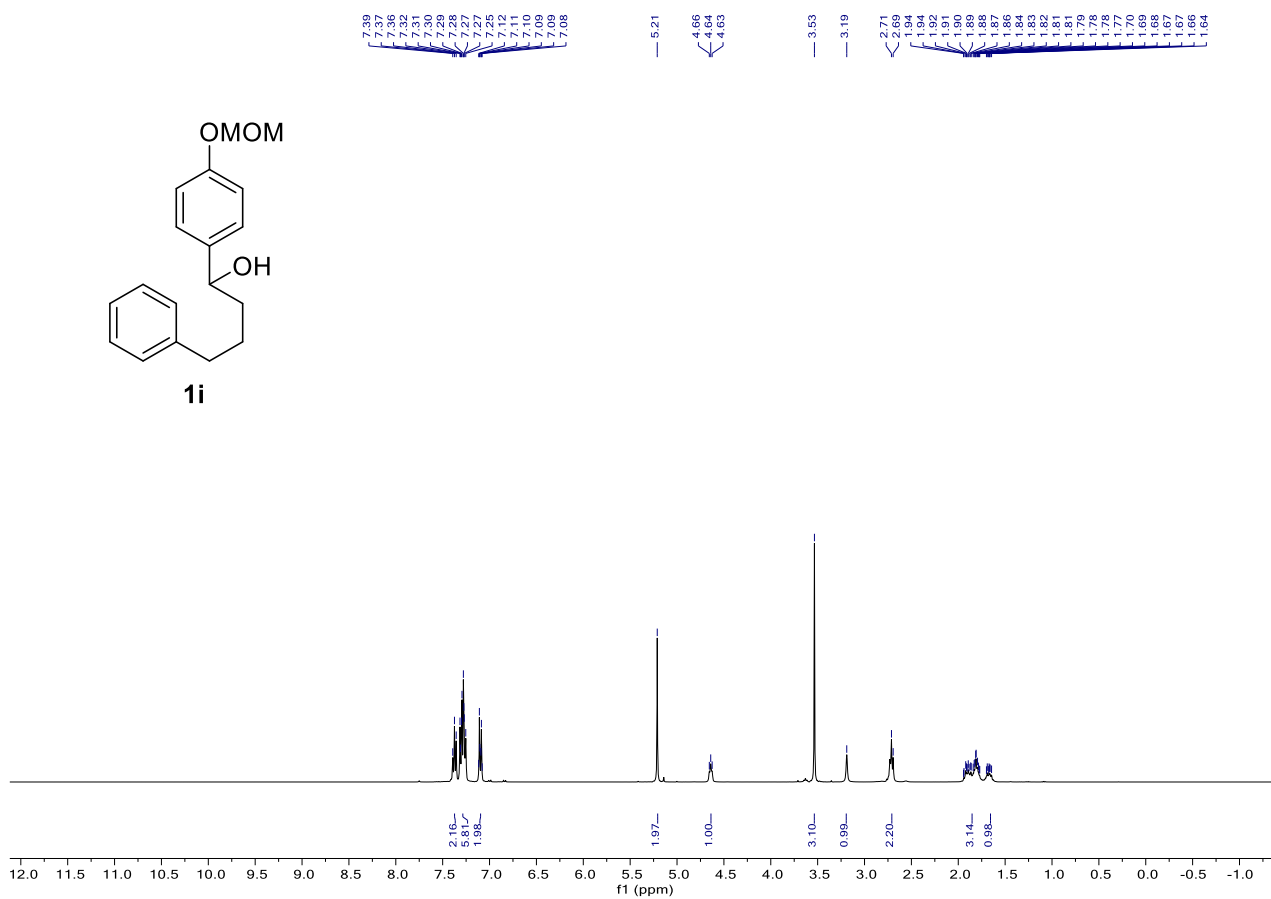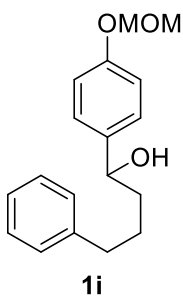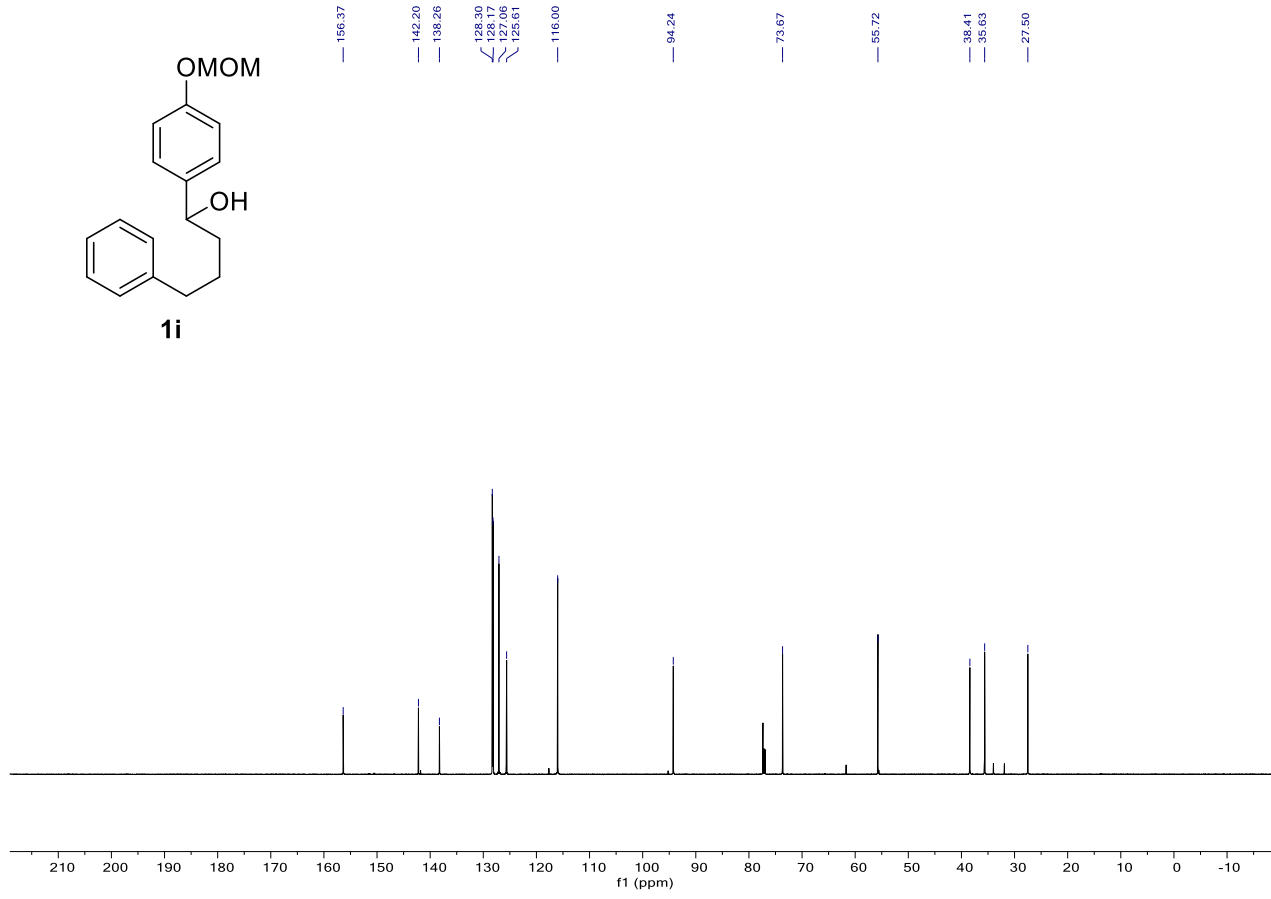

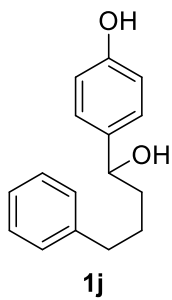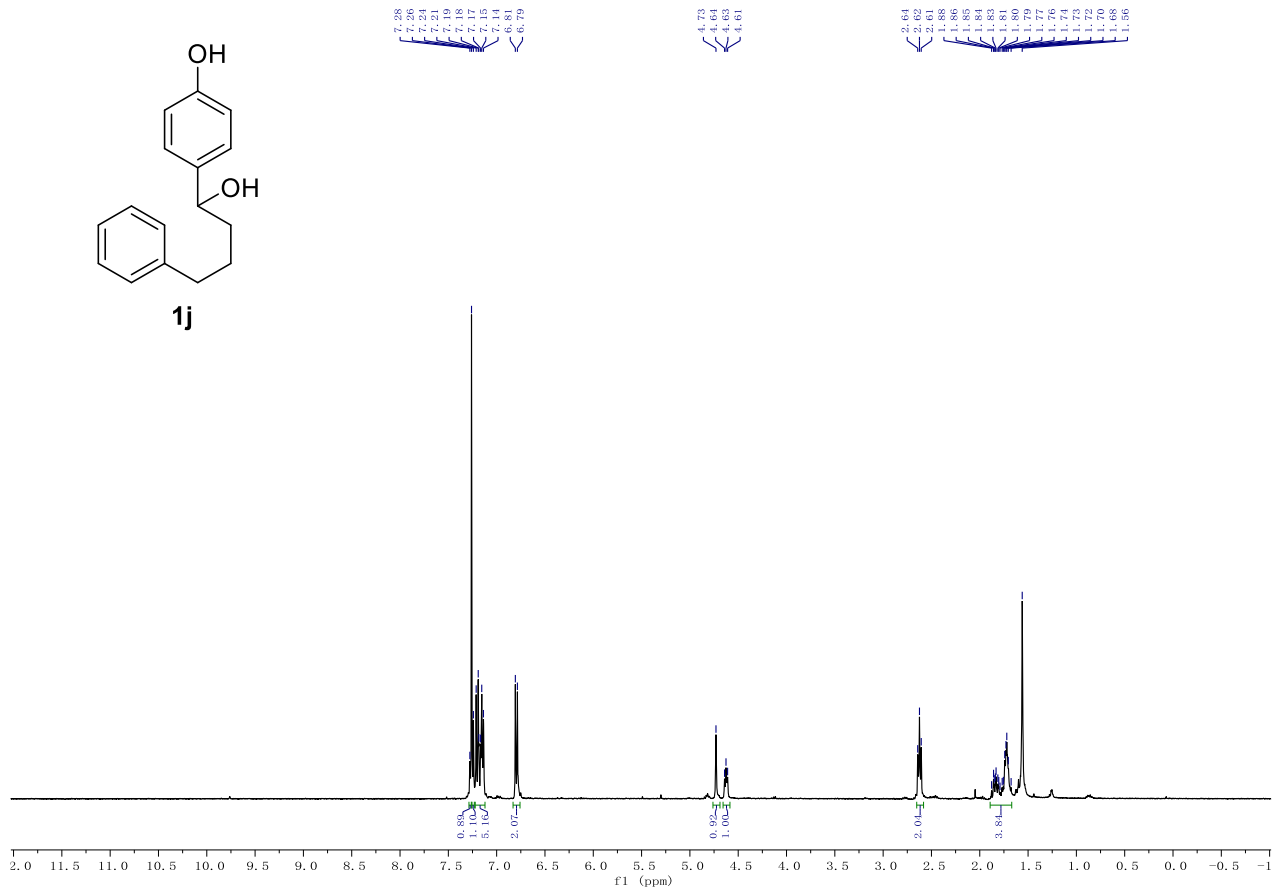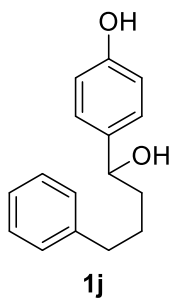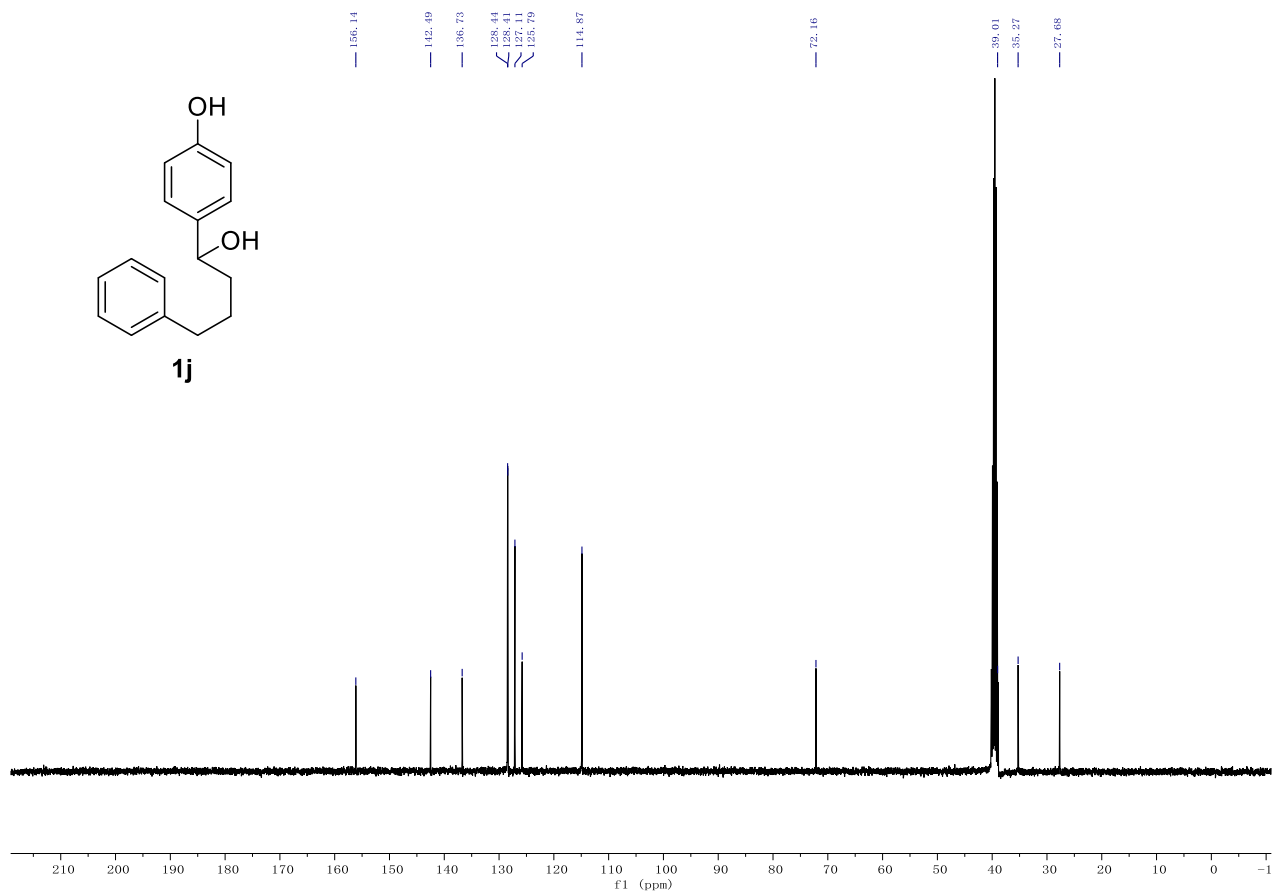

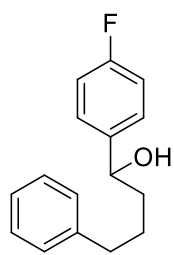

**1k**

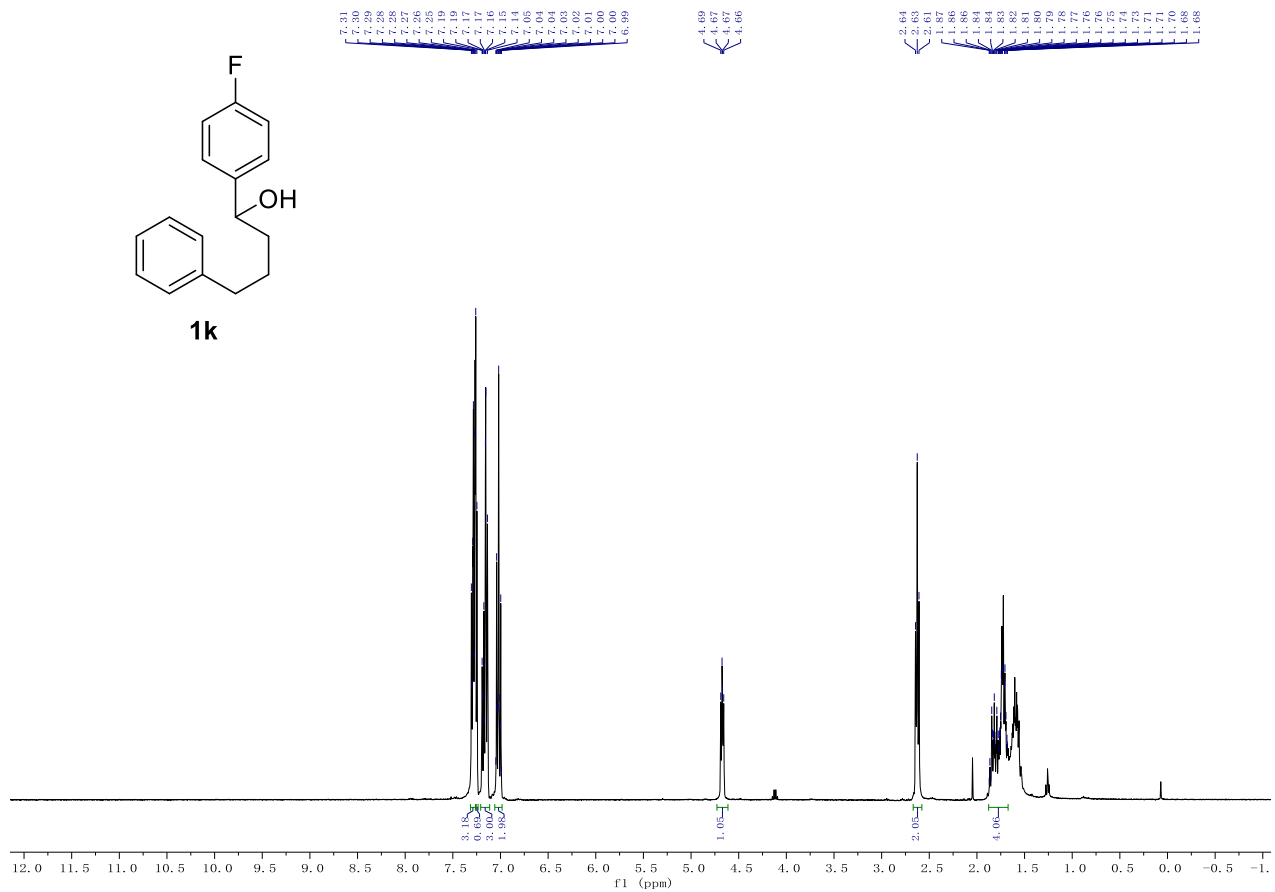

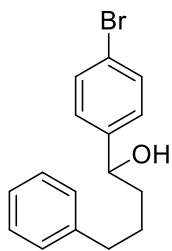

11

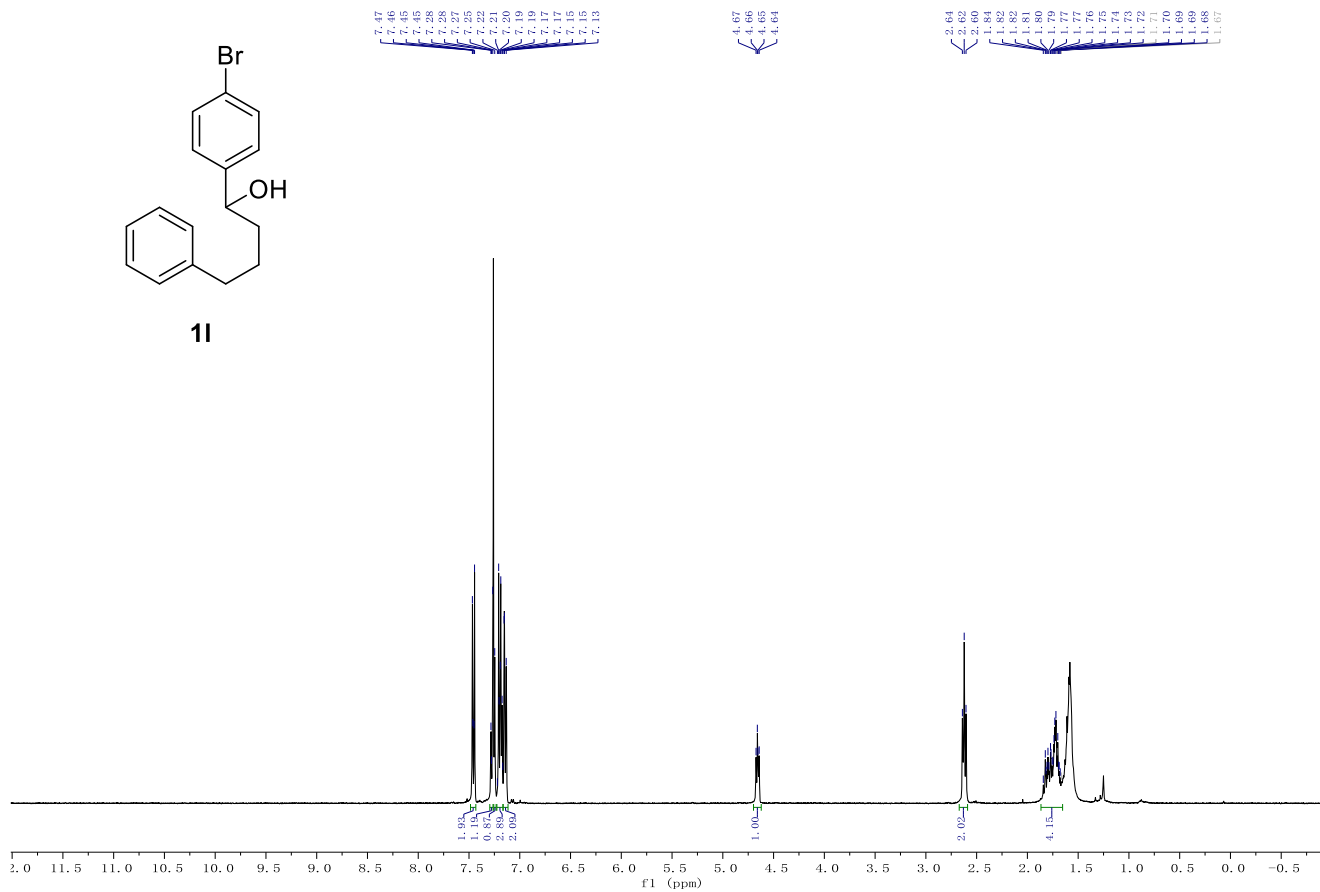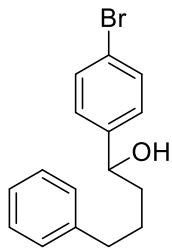

11

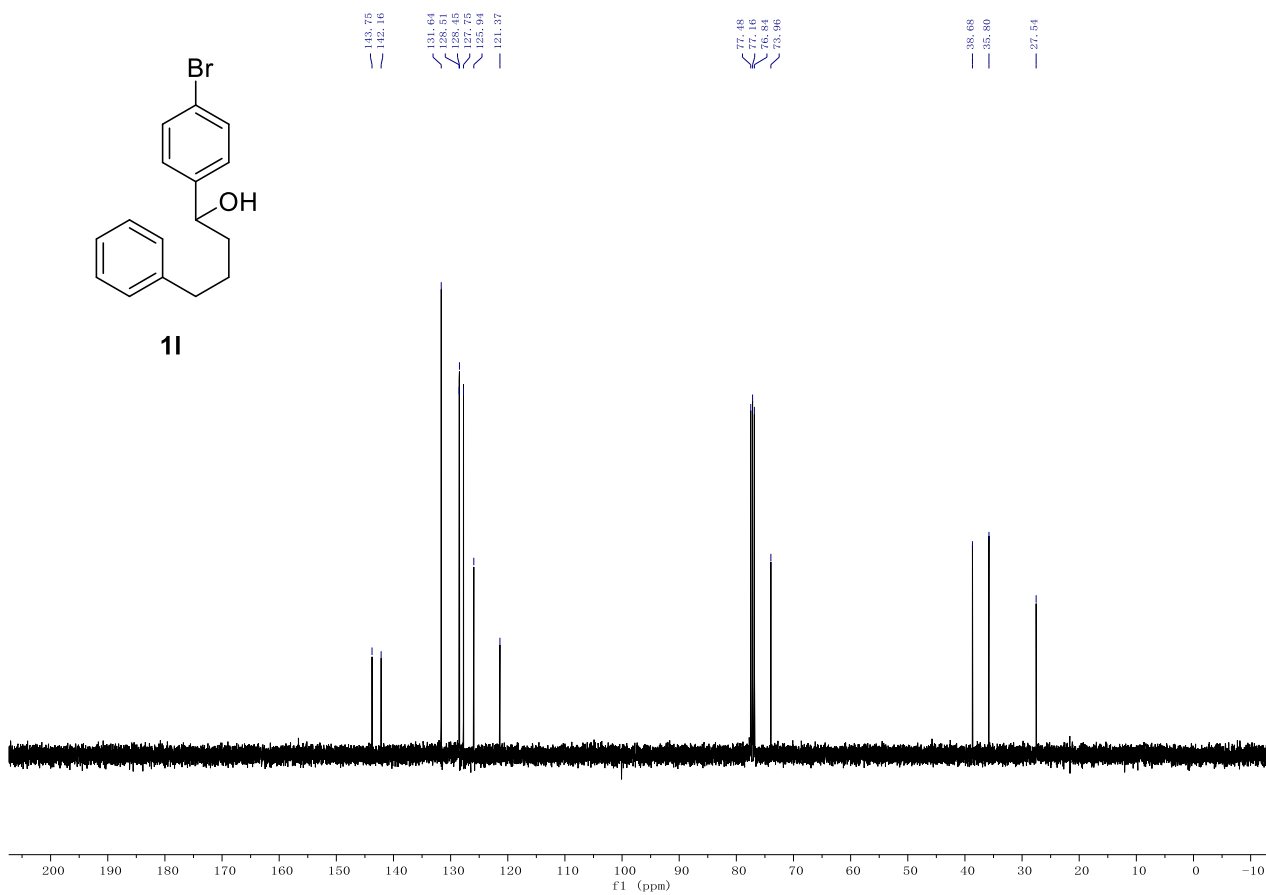

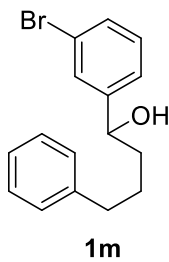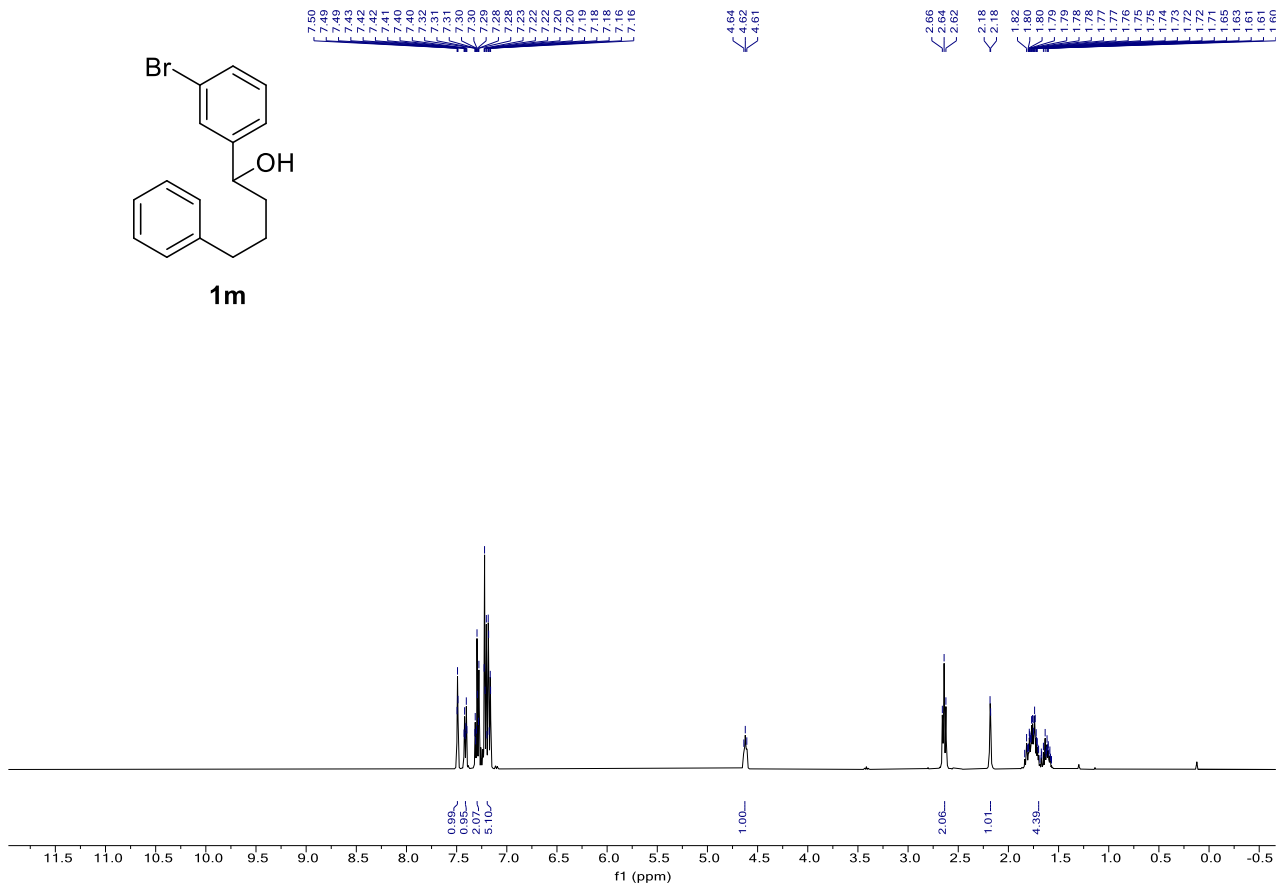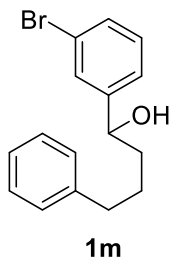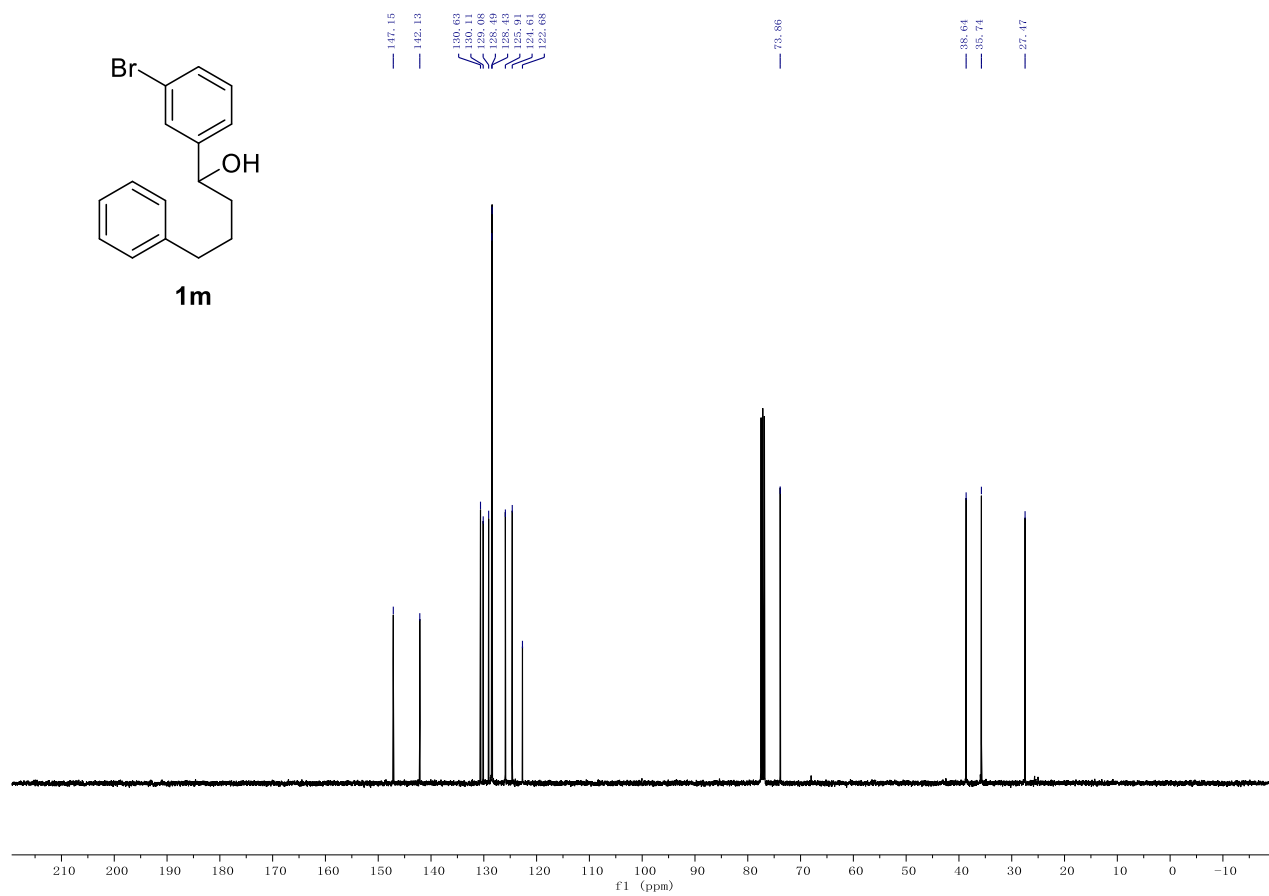



7.44  
7.43  
7.43  
7.42  
7.42  
7.41  
7.41  
7.40  
7.39  
7.39  
7.38  
7.37  
7.36  
7.35  
7.34  
7.34  
7.33  
7.33  
7.32  
7.32  
7.29  
7.29  
7.28  
7.28  
7.28  
7.27  
7.27  
7.26  
7.25  
7.25  
7.23  
7.23  
4.64  
4.62  
4.60  
2.90  
2.79  
2.78  
2.77  
2.77  
2.75  
2.75  
2.75  
2.72  
2.69  
2.33  
1.88  
1.88  
1.87  
1.86  
1.85  
1.84  
1.83  
1.83  
1.82  
1.81  
1.81  
1.80  
1.79  
1.78  
1.77  
1.77  
1.76  
1.75  
1.74  
1.74  
1.72  
1.72  
1.71  
1.71  
1.70  
1.68  
1.68  
1.67  
1.66  
1.65  
1.64  
1.63  
1.63  
1.62  
1.62  
1.61  
1.61  
1.60  
1.60  
1.59  
1.59  
1.58  
1.58  
1.54  
1.54  
1.33  
1.33

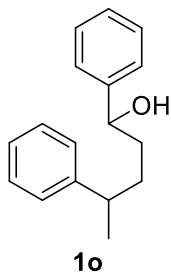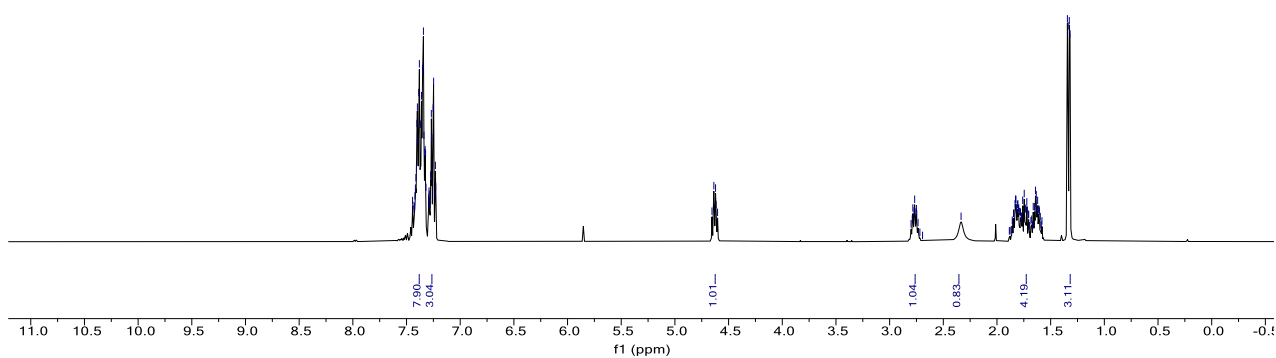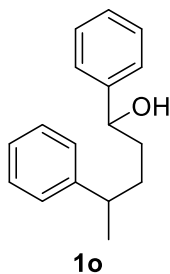

147.39  
141.62  
128.55  
128.48  
127.65  
127.11  
126.04  
74.89  
74.77  
39.97  
37.24  
34.44  
22.51

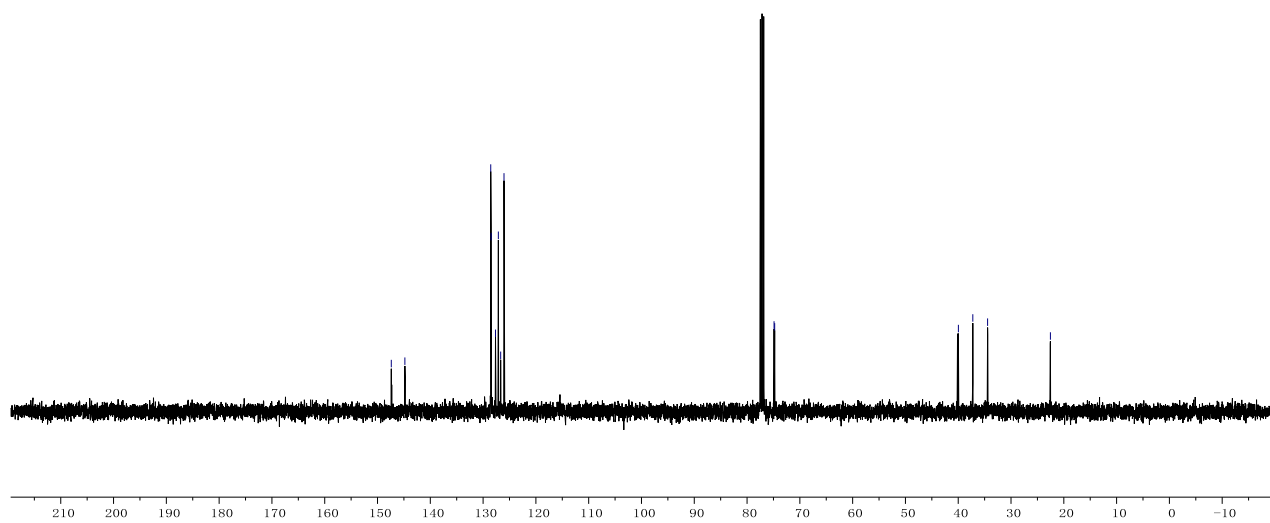

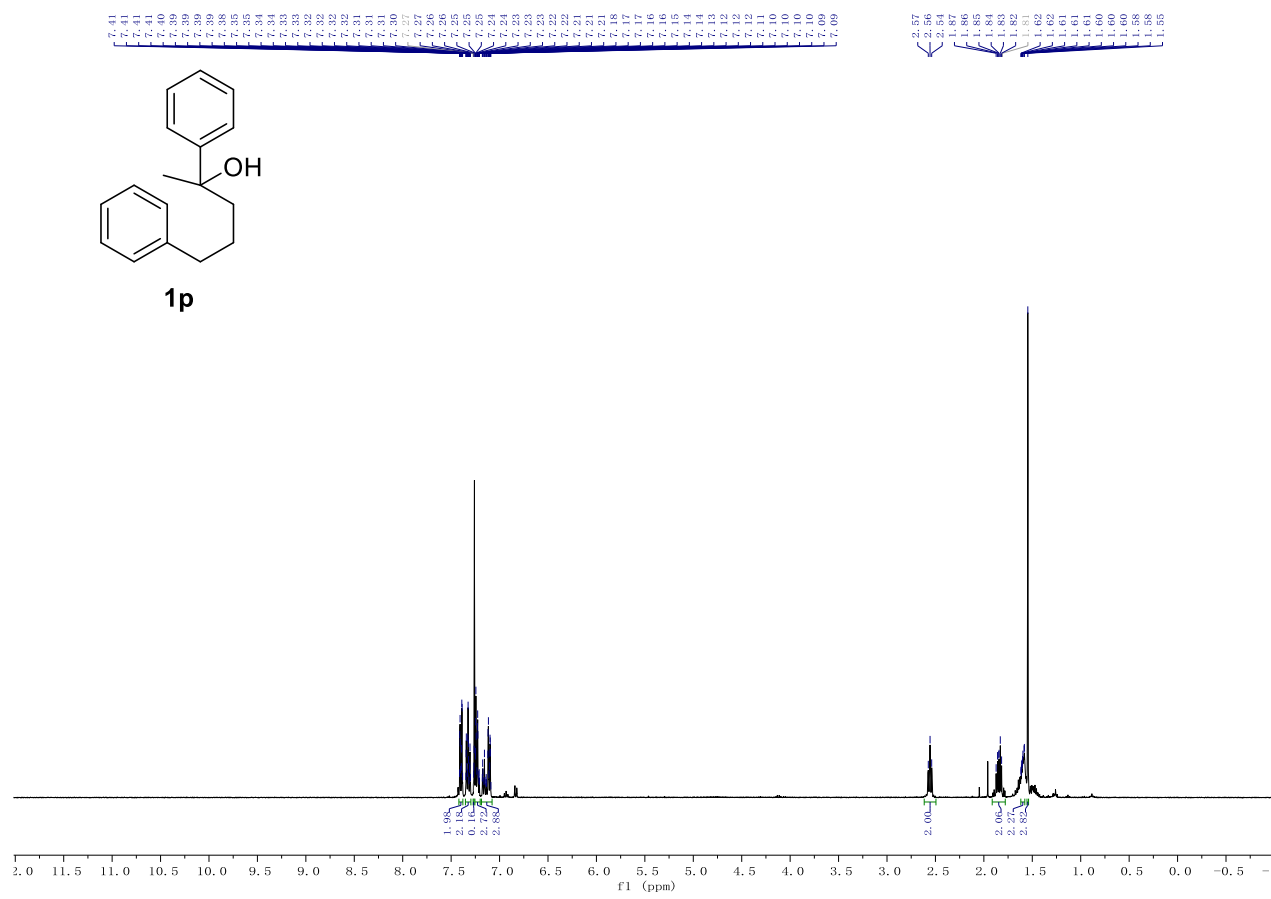



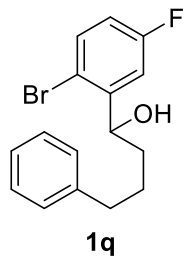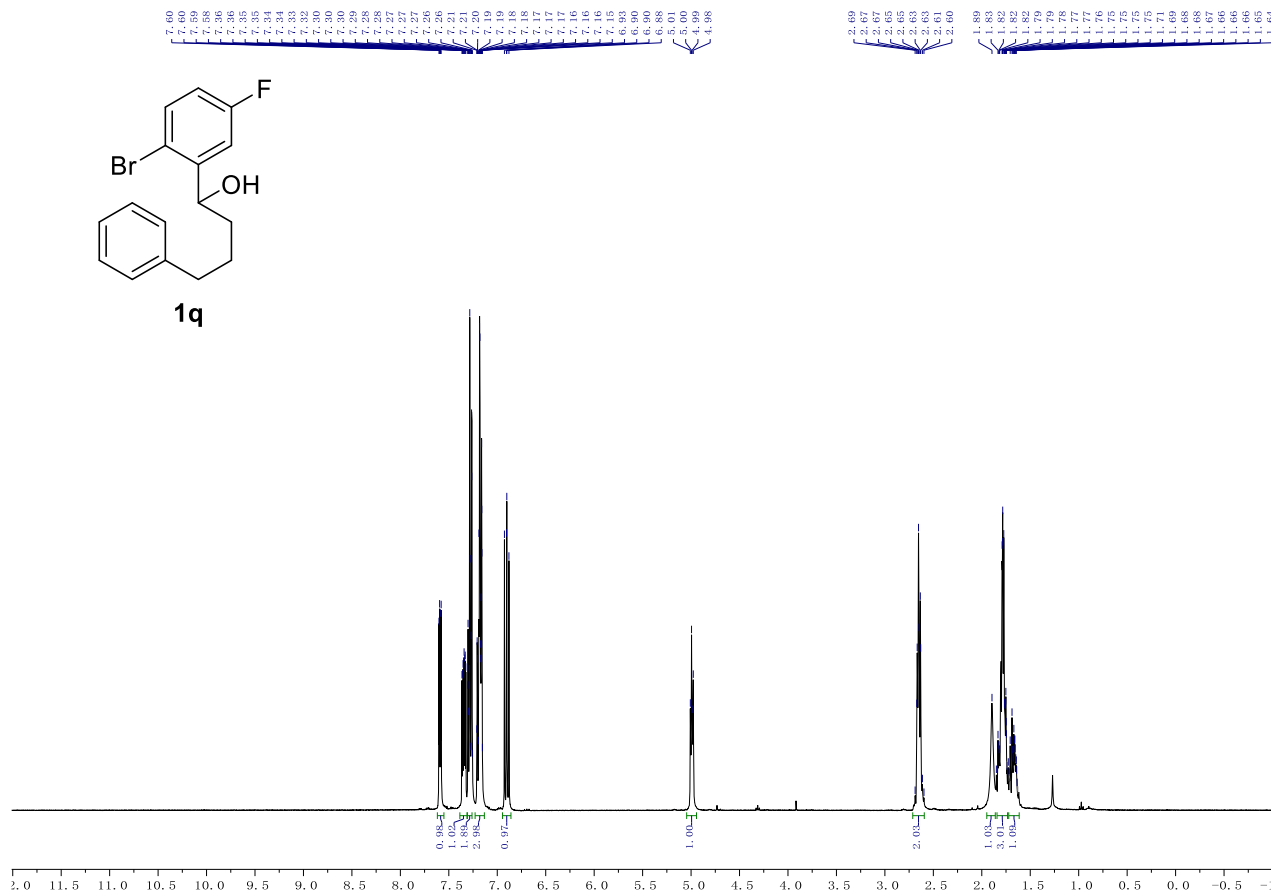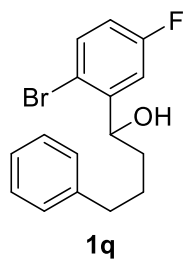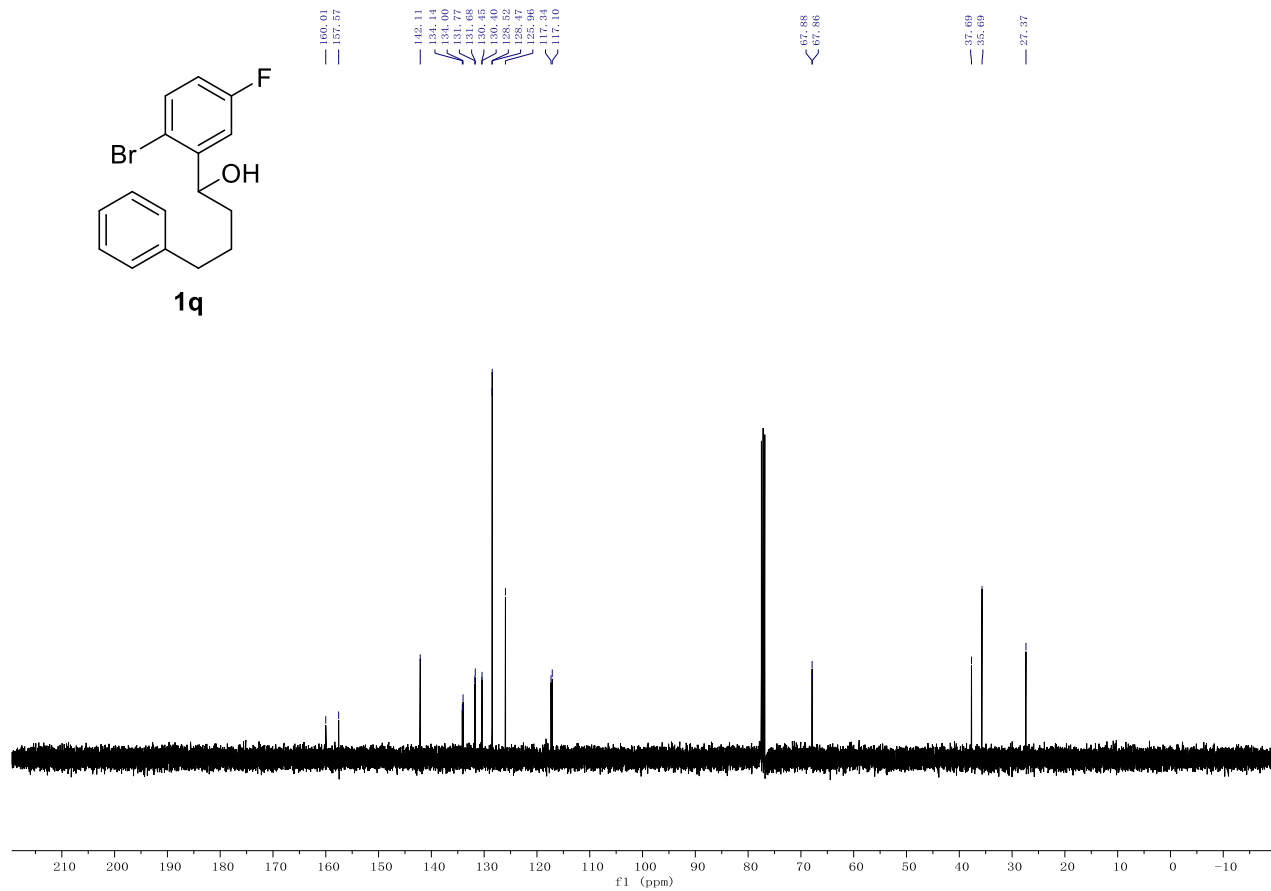

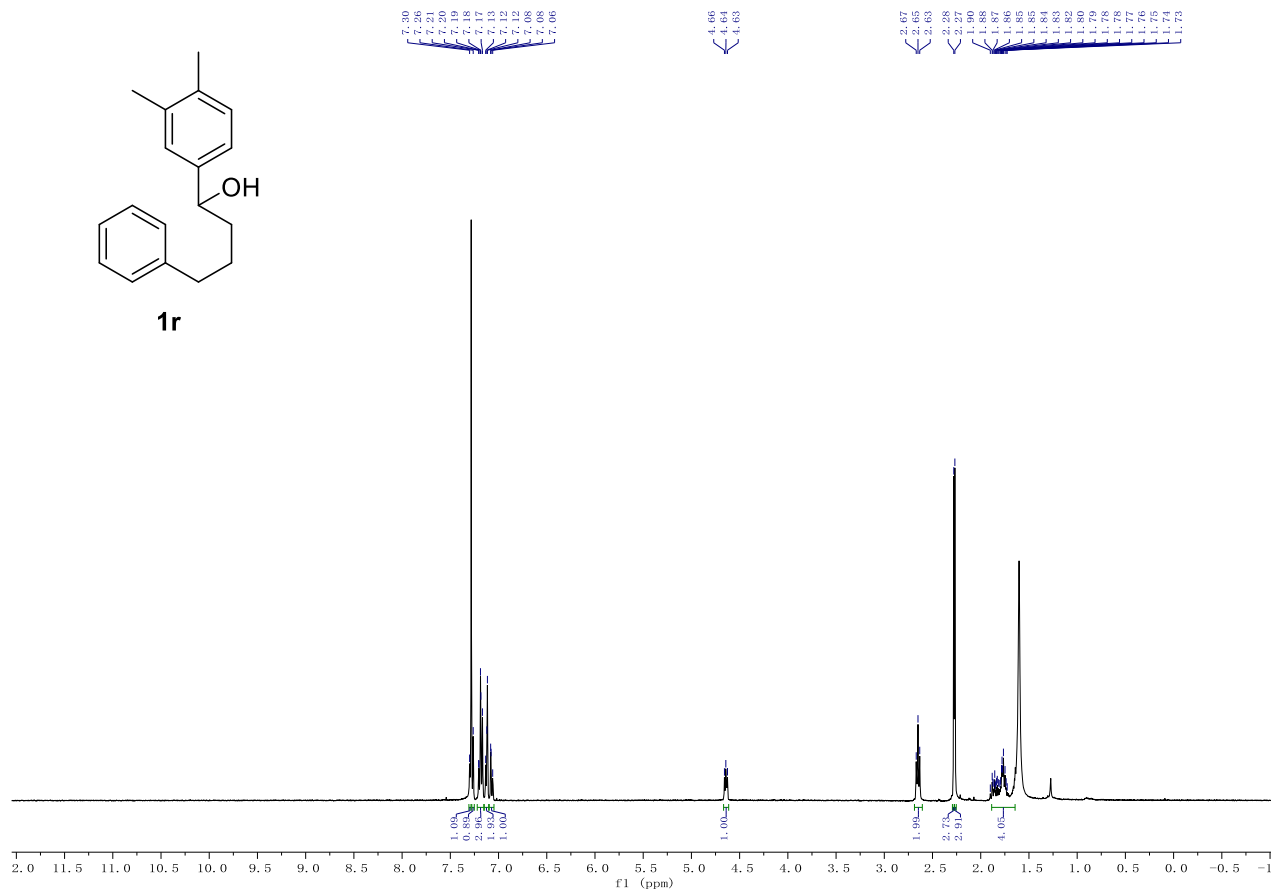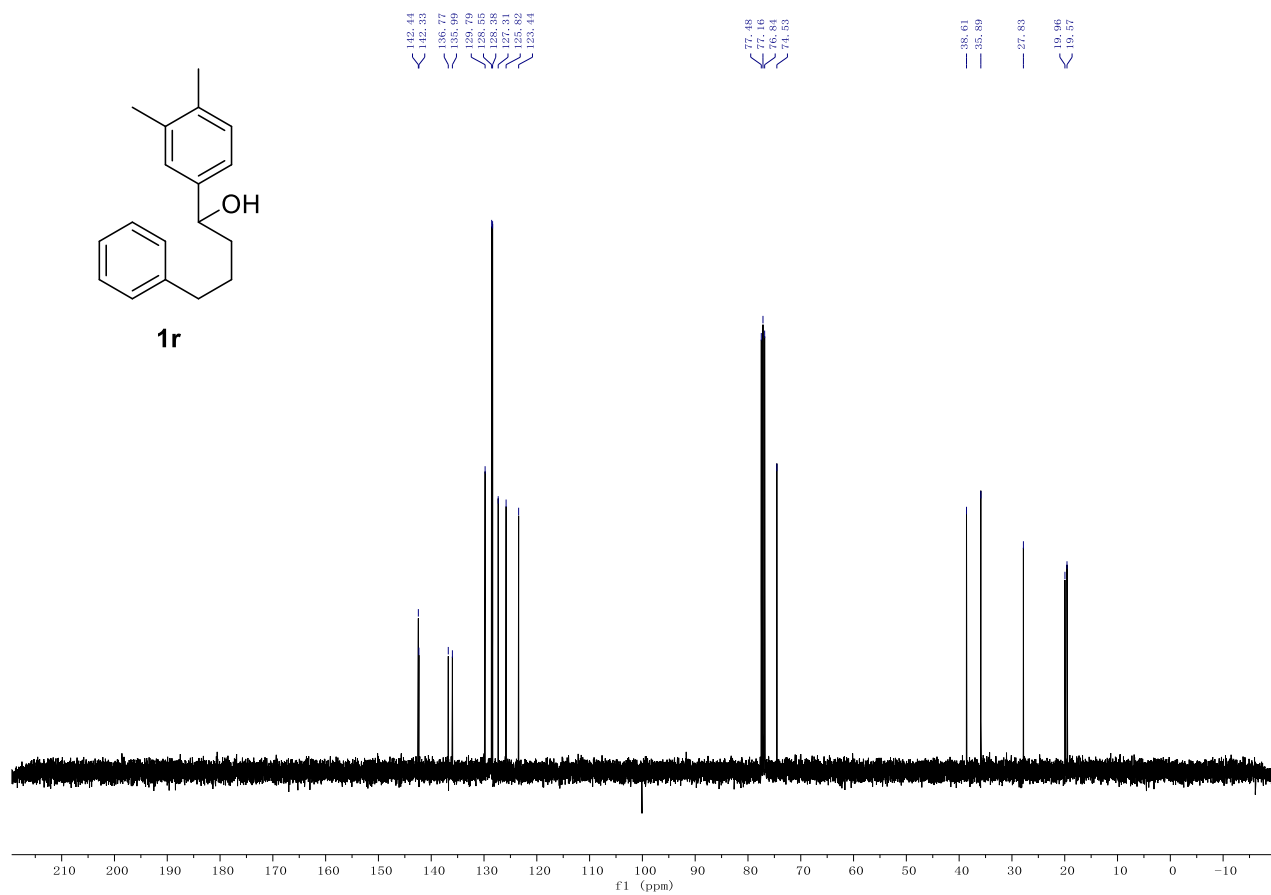



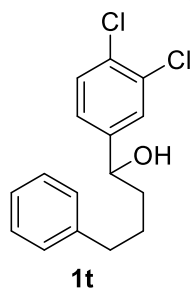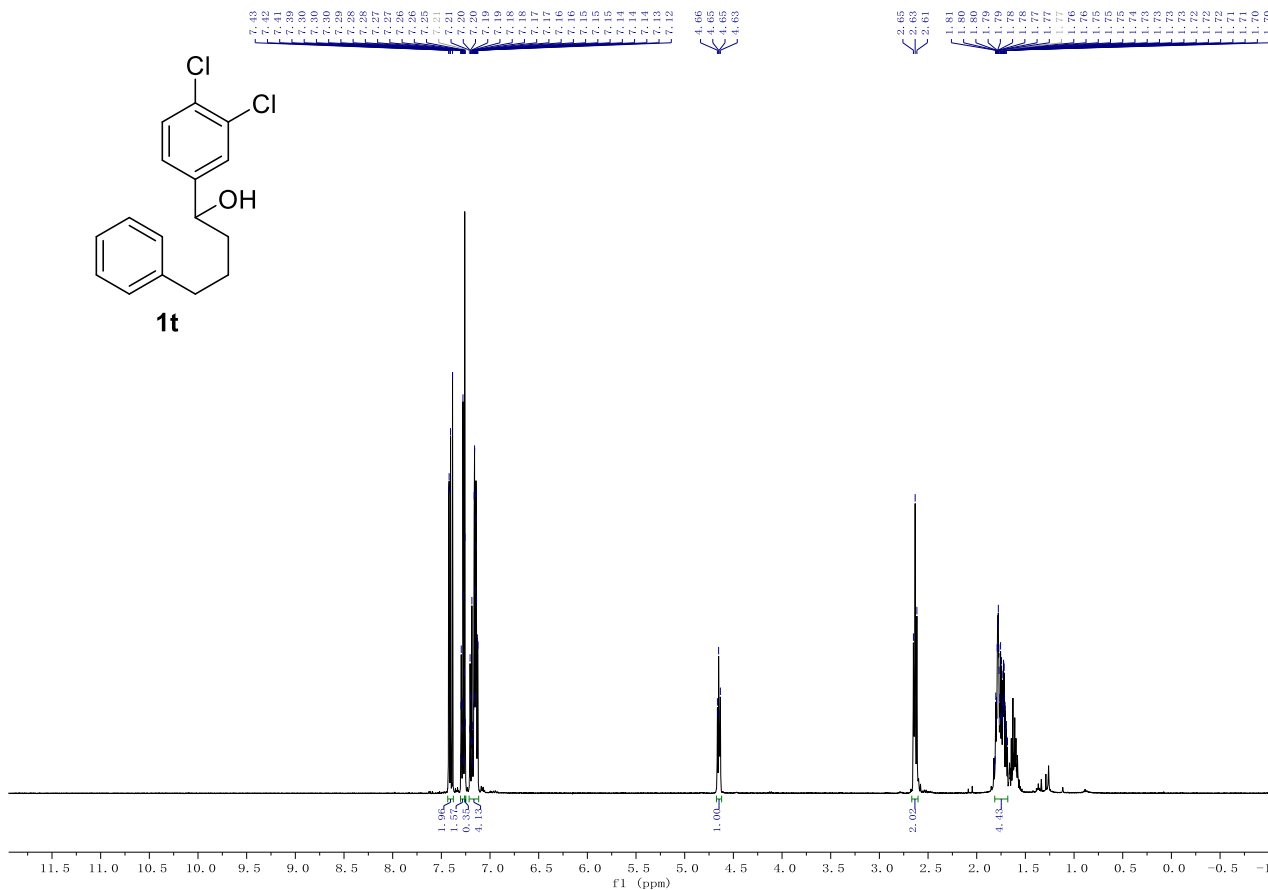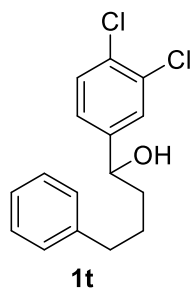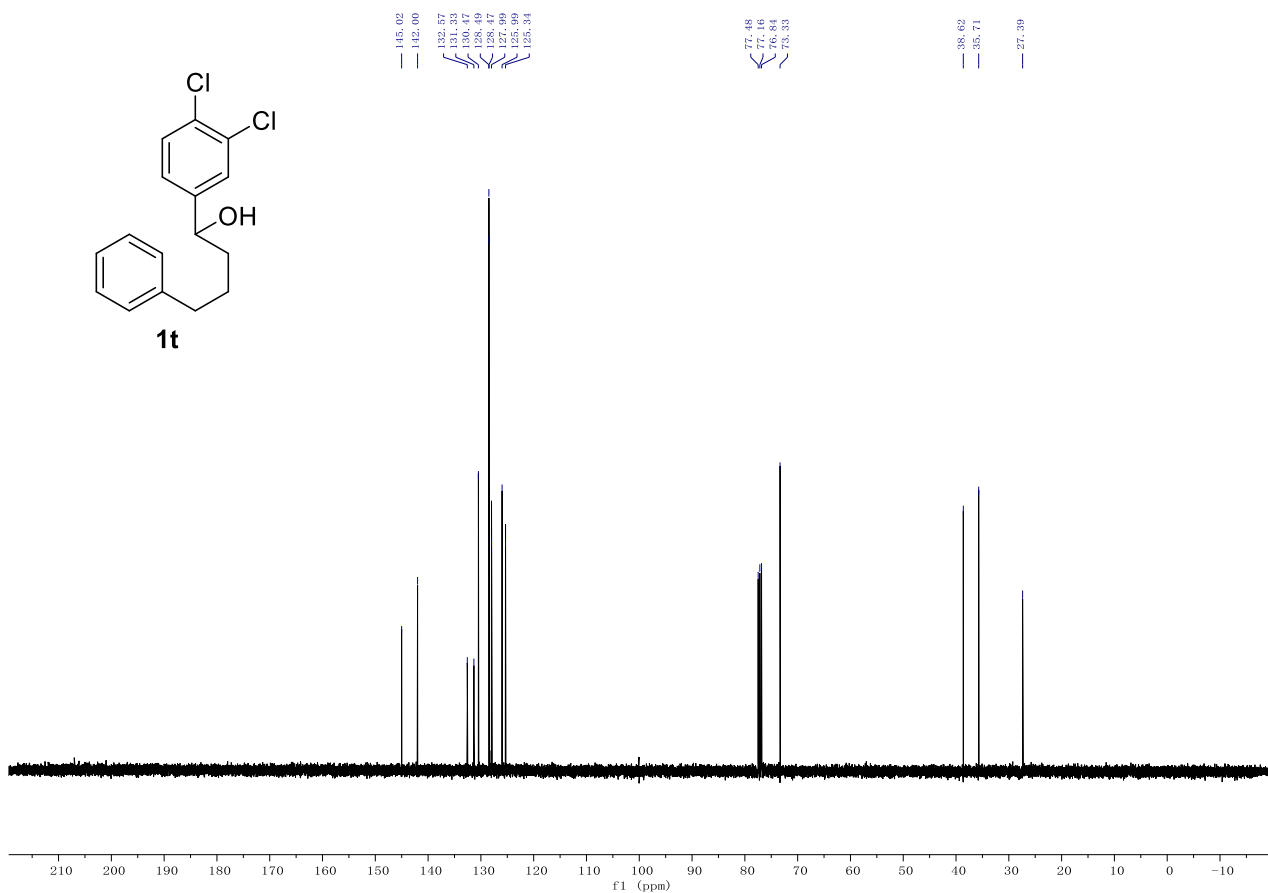

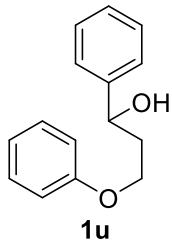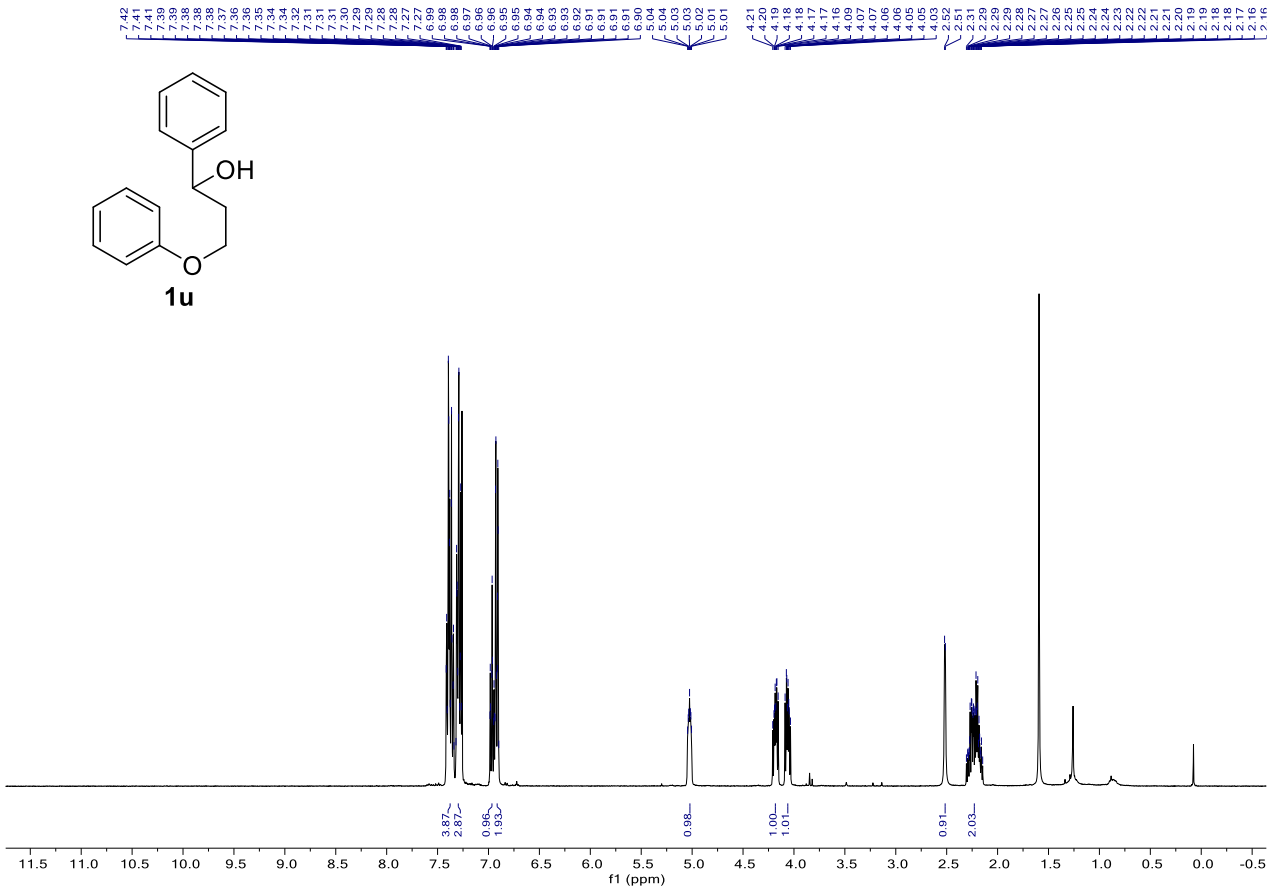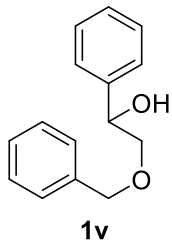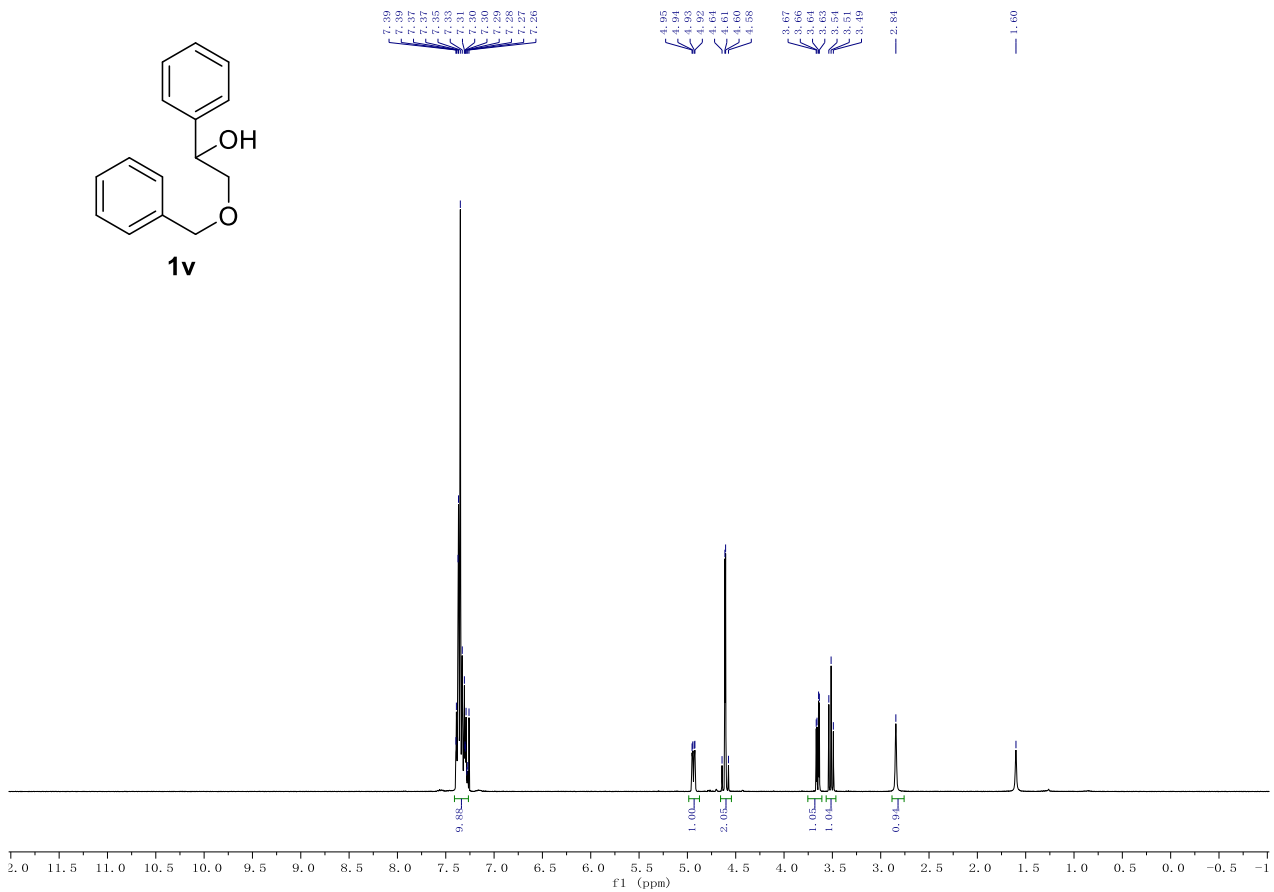

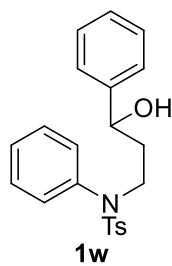

7.51  
7.50  
7.50  
7.36  
7.36  
7.34  
7.34  
7.32  
7.31  
7.31  
7.30  
7.27  
7.26  
7.25  
7.25  
7.11  
7.11  
7.10  
4.93  
4.92  
4.91  
4.90  
3.97  
3.96  
3.95  
3.94  
3.93  
3.59  
3.58  
3.57  
3.55  
3.55  
3.15  
2.44  
1.87  
1.86  
1.85  
1.84  
1.83  
1.82  
1.81  
1.81  
1.81  
1.79

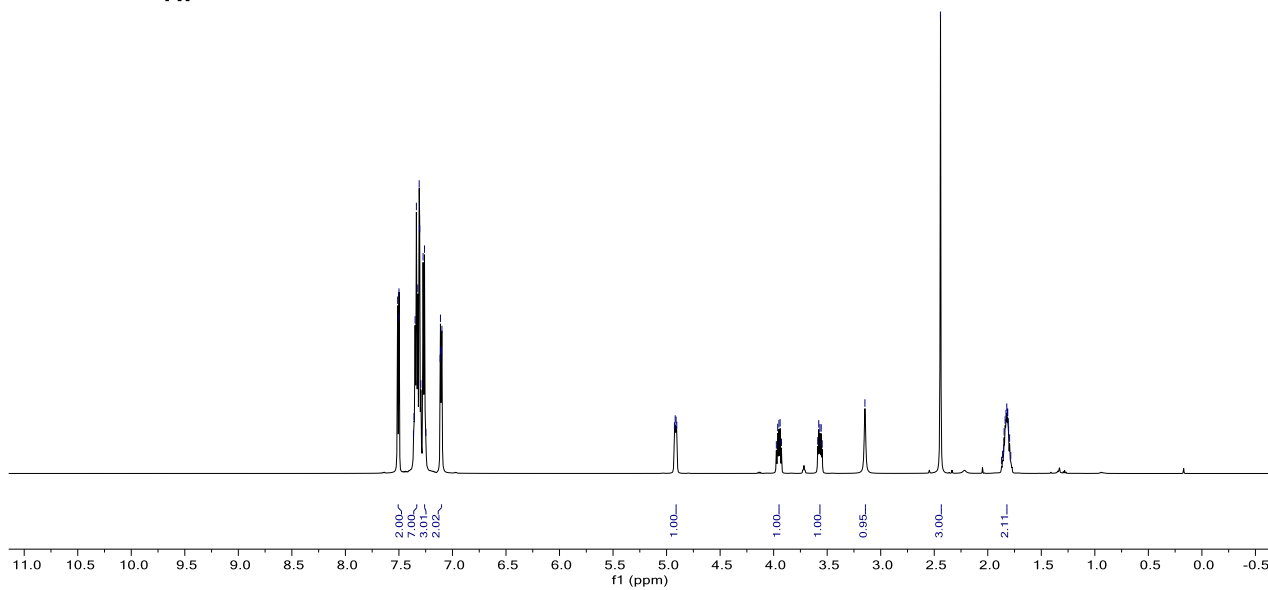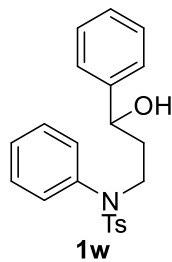

144.10  
143.49  
138.96  
134.92  
129.43  
129.07  
128.92  
128.82  
127.98  
127.82  
127.80  
125.85  
70.58  
47.58  
37.52  
21.49

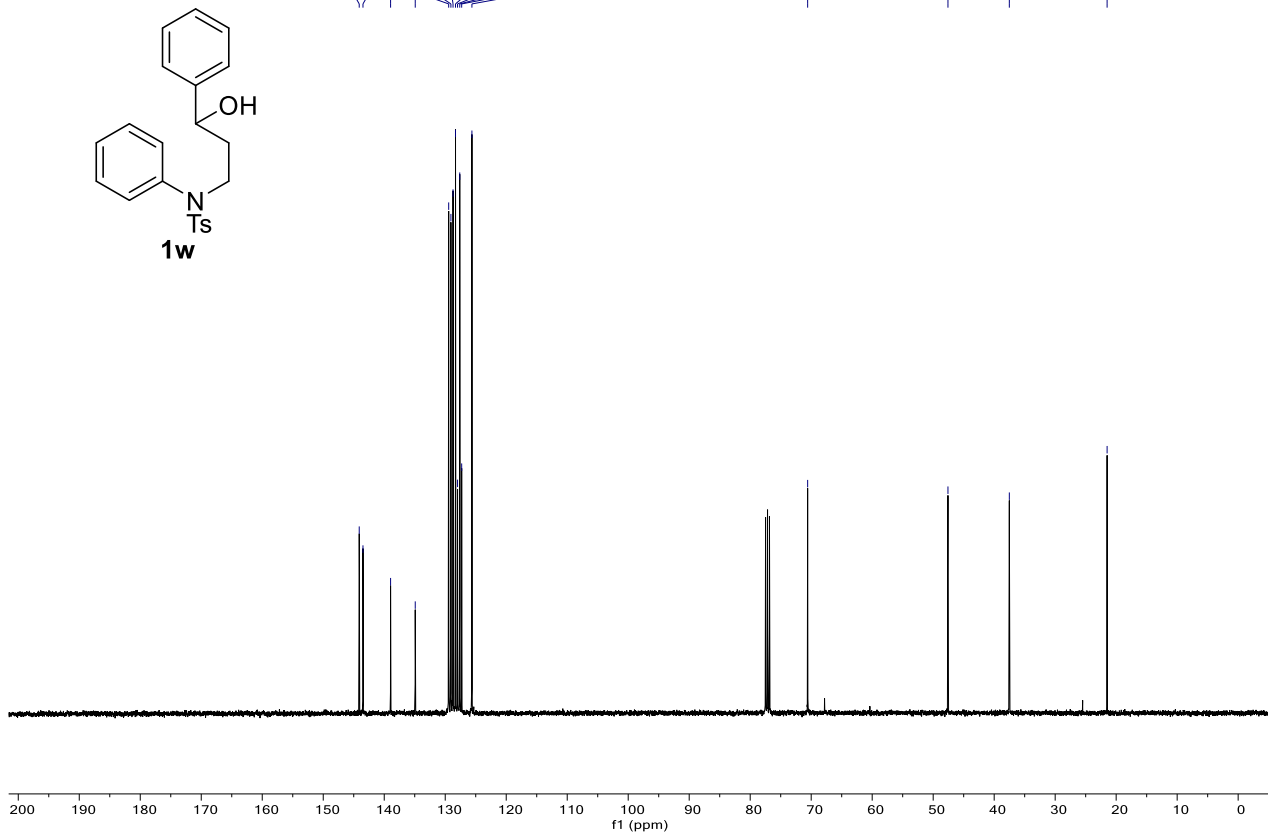

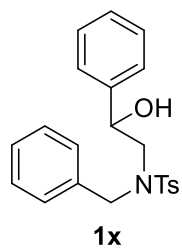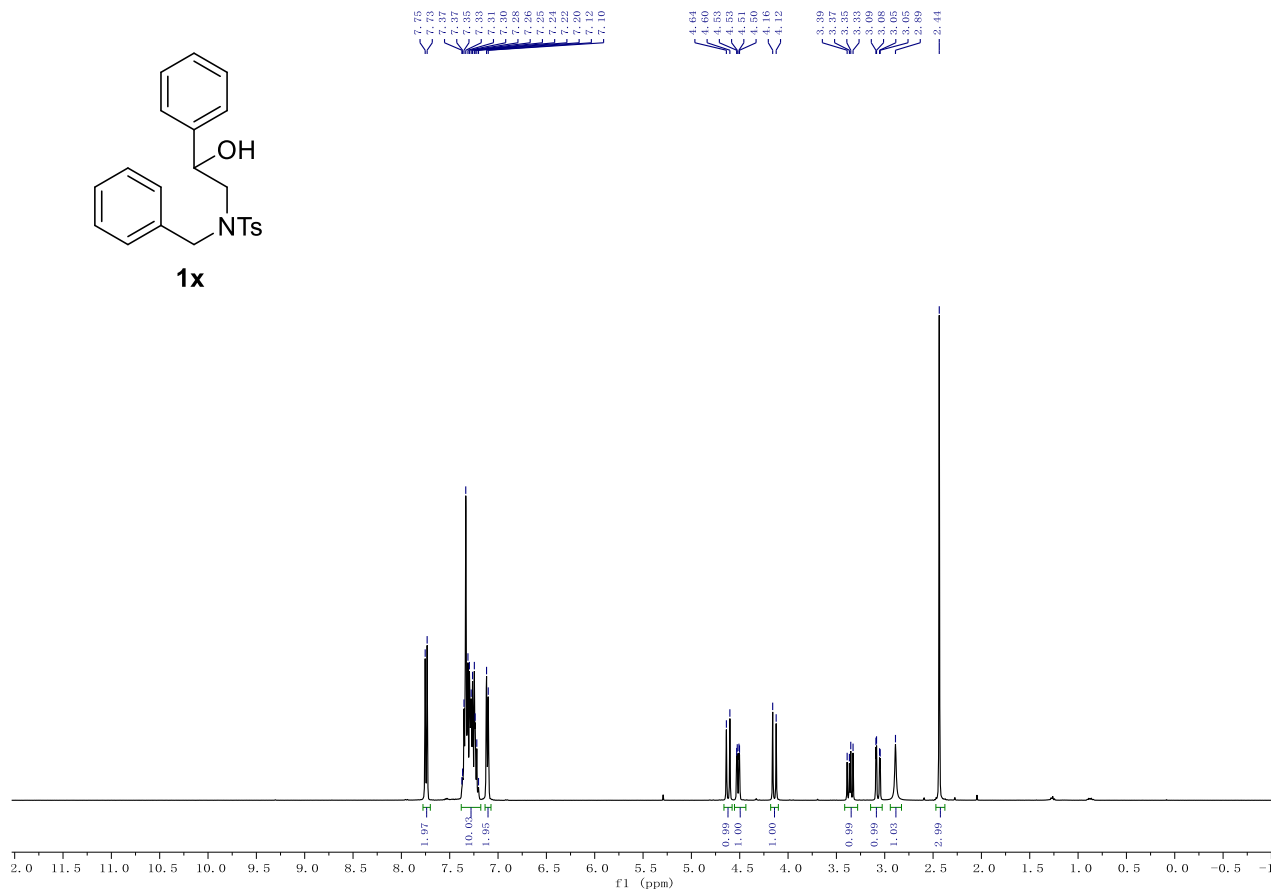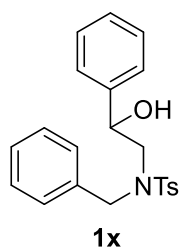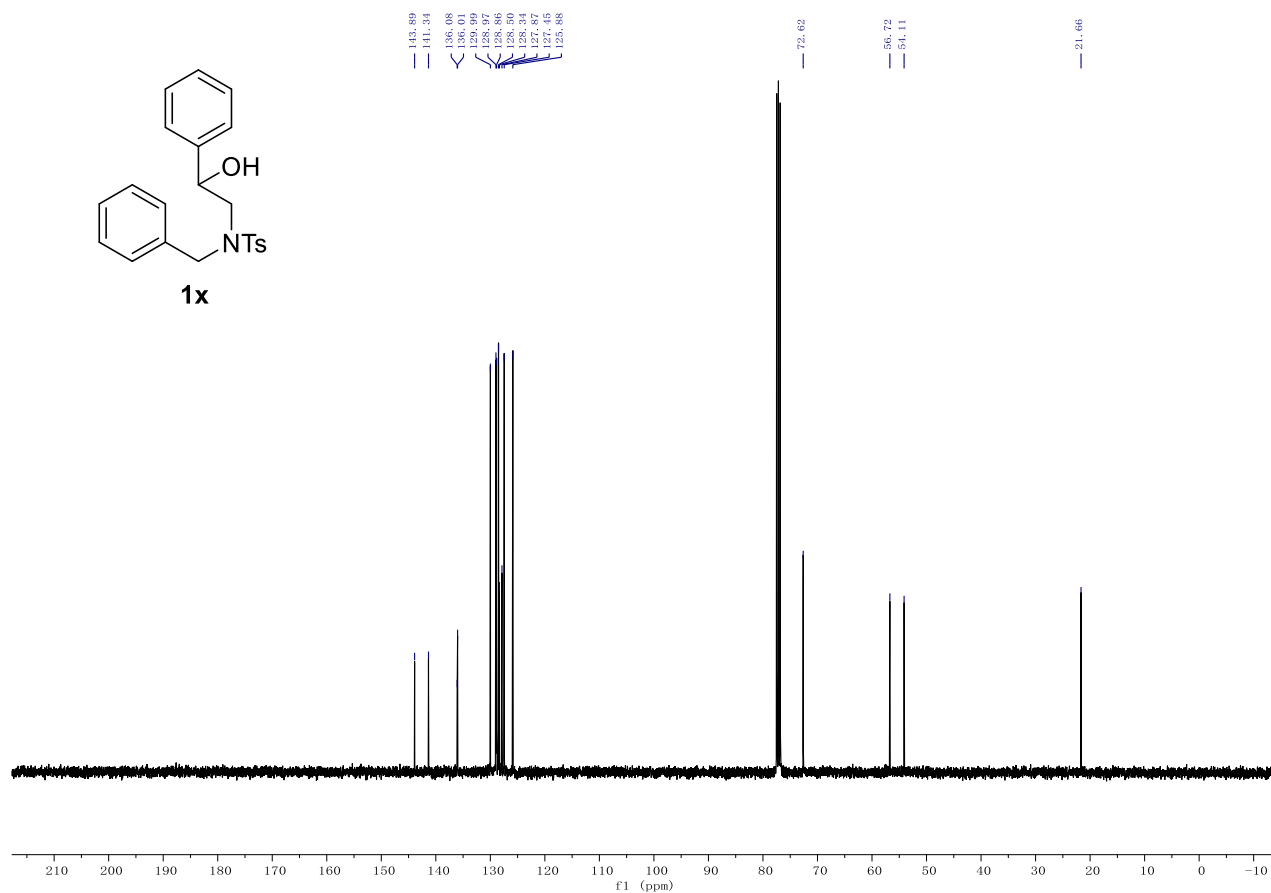

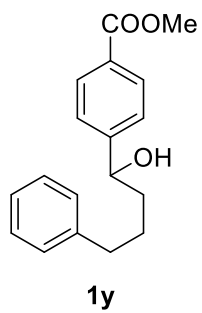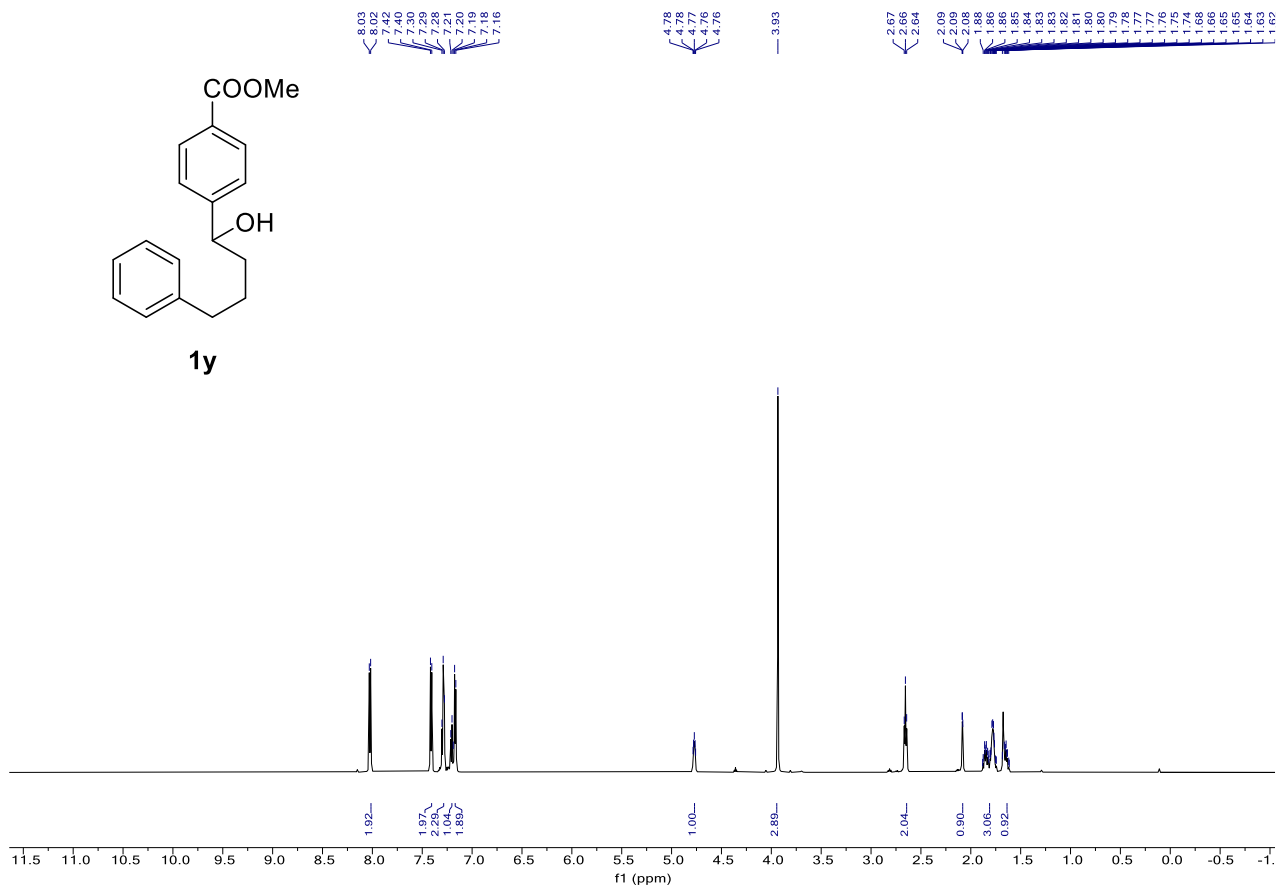



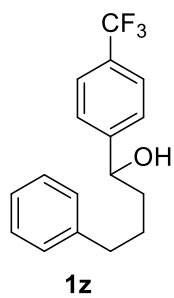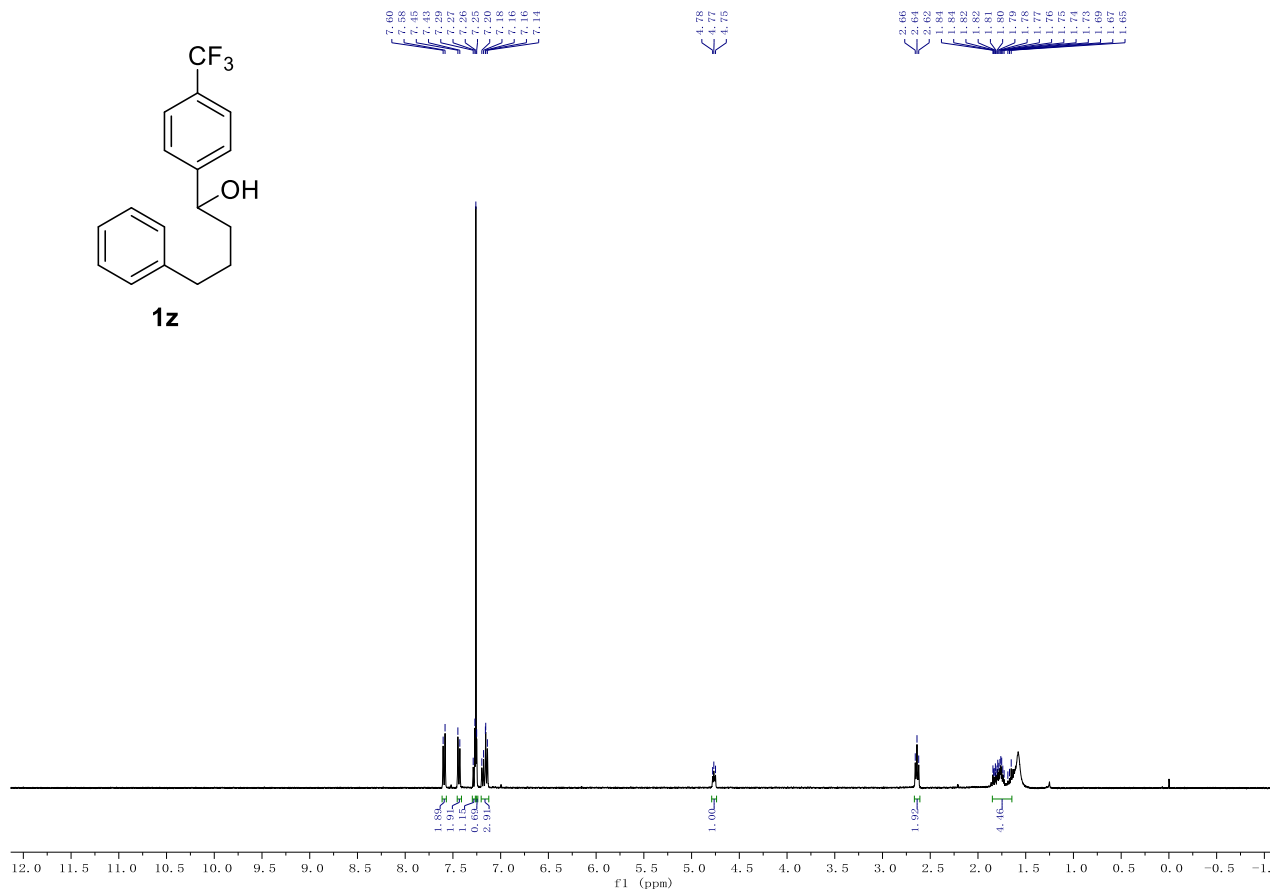

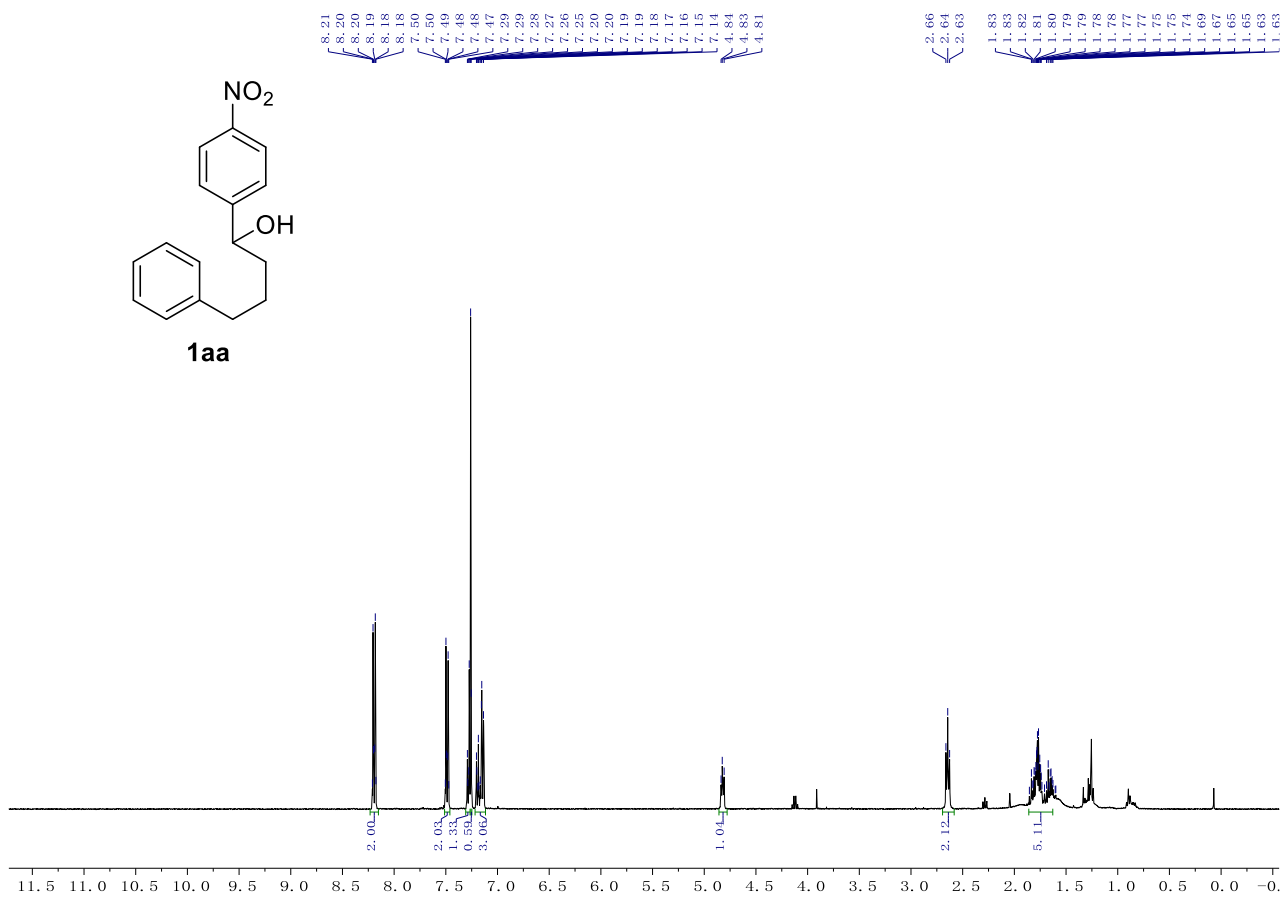

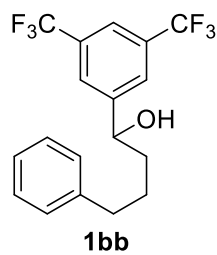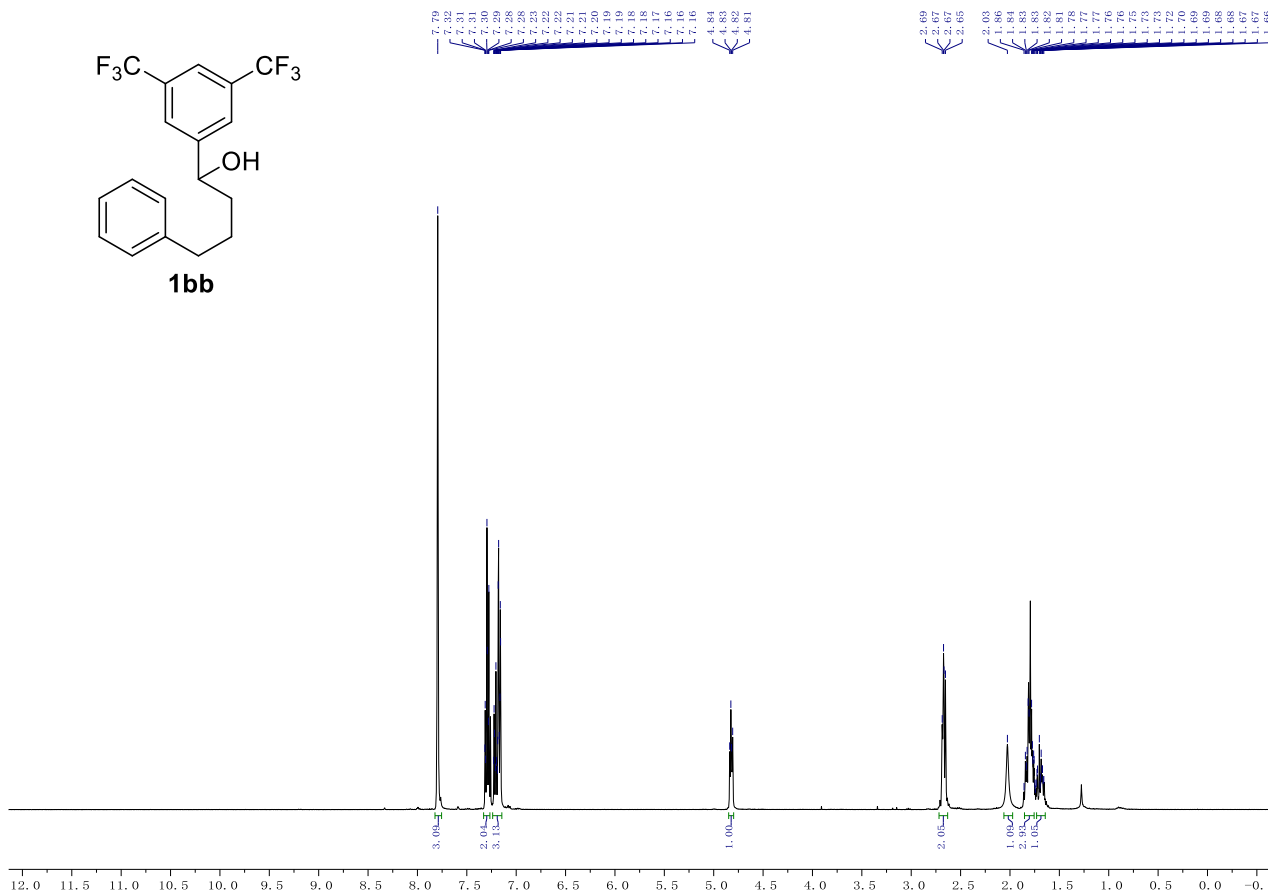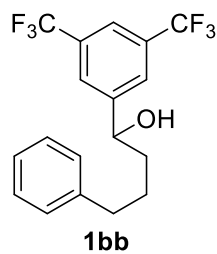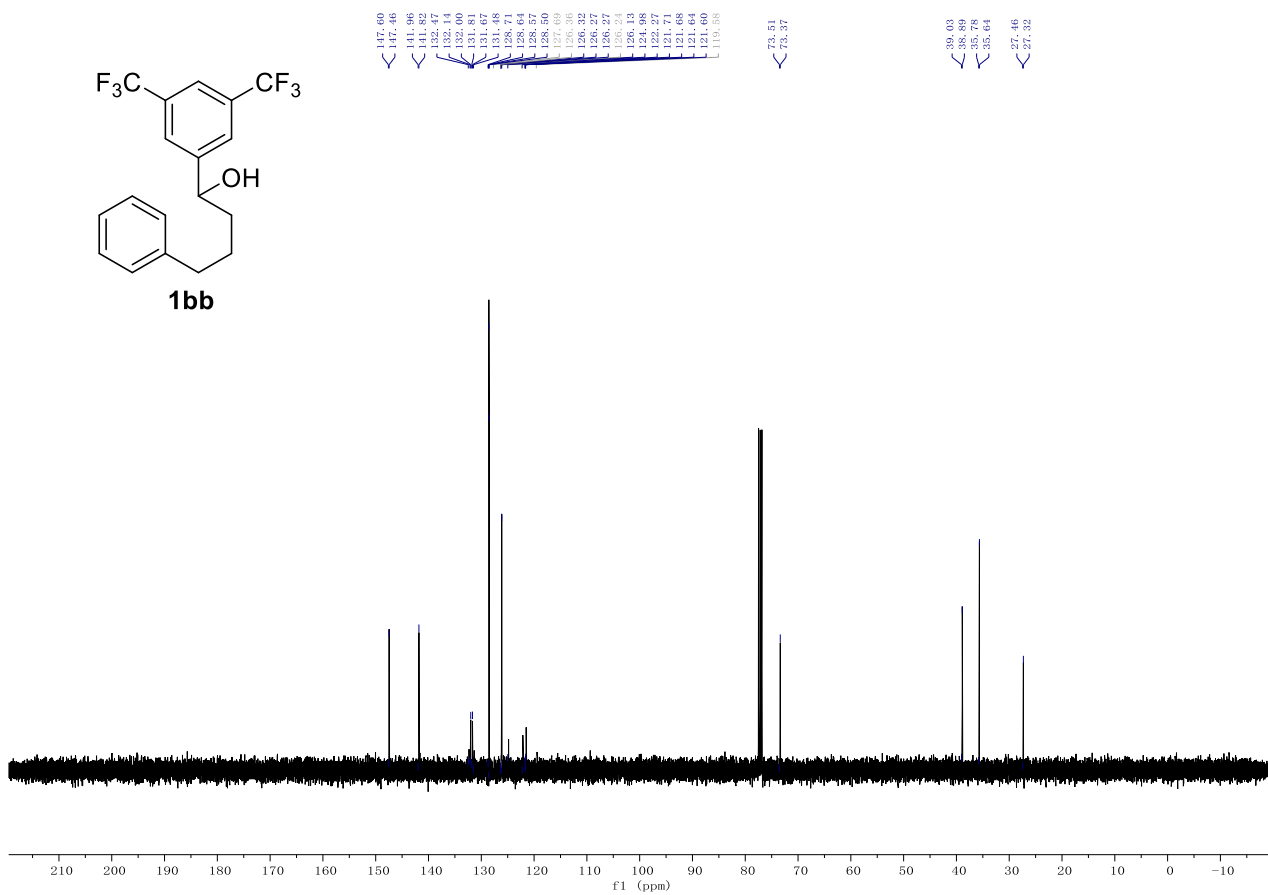

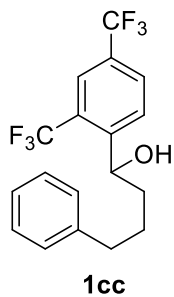

7.95  
7.893  
7.889  
7.885  
7.886  
7.884  
7.883  
7.882  
7.832  
7.31  
7.30  
7.29  
7.28  
7.23  
7.23  
7.23  
7.21  
7.21  
7.19  
5.21  
5.21  
5.20  
5.19  
5.18  
5.18  
5.18  
5.17

2.71  
2.70  
2.69  
2.68  
2.66  
2.06  
1.96  
1.96  
1.96  
1.94  
1.94  
1.92  
1.87  
1.81  
1.79  
1.79  
1.77  
1.77  
1.76  
1.74  
1.74  
1.73  
1.73  
1.72

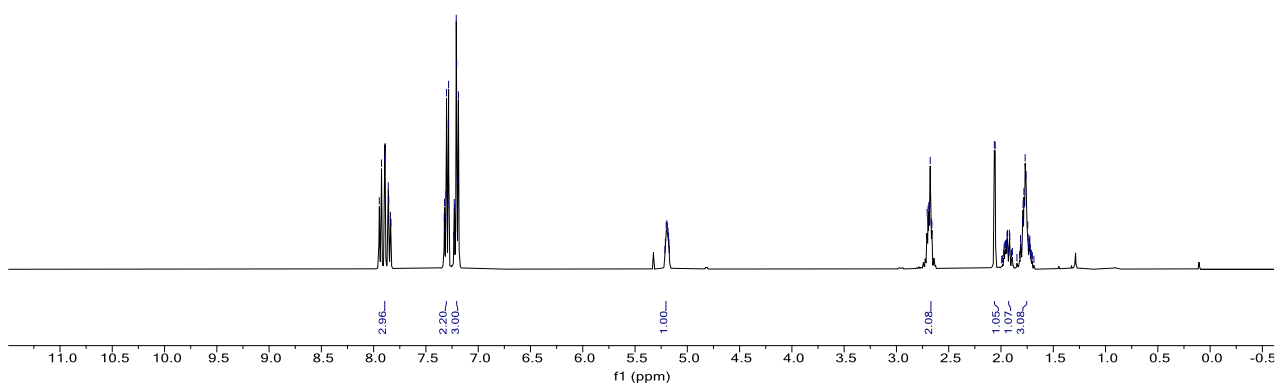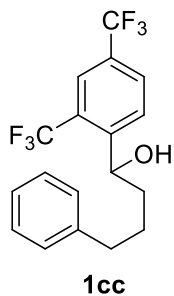

111.98  
128.77  
128.50  
128.49  
126.02

69.34  
38.97  
35.66  
27.85

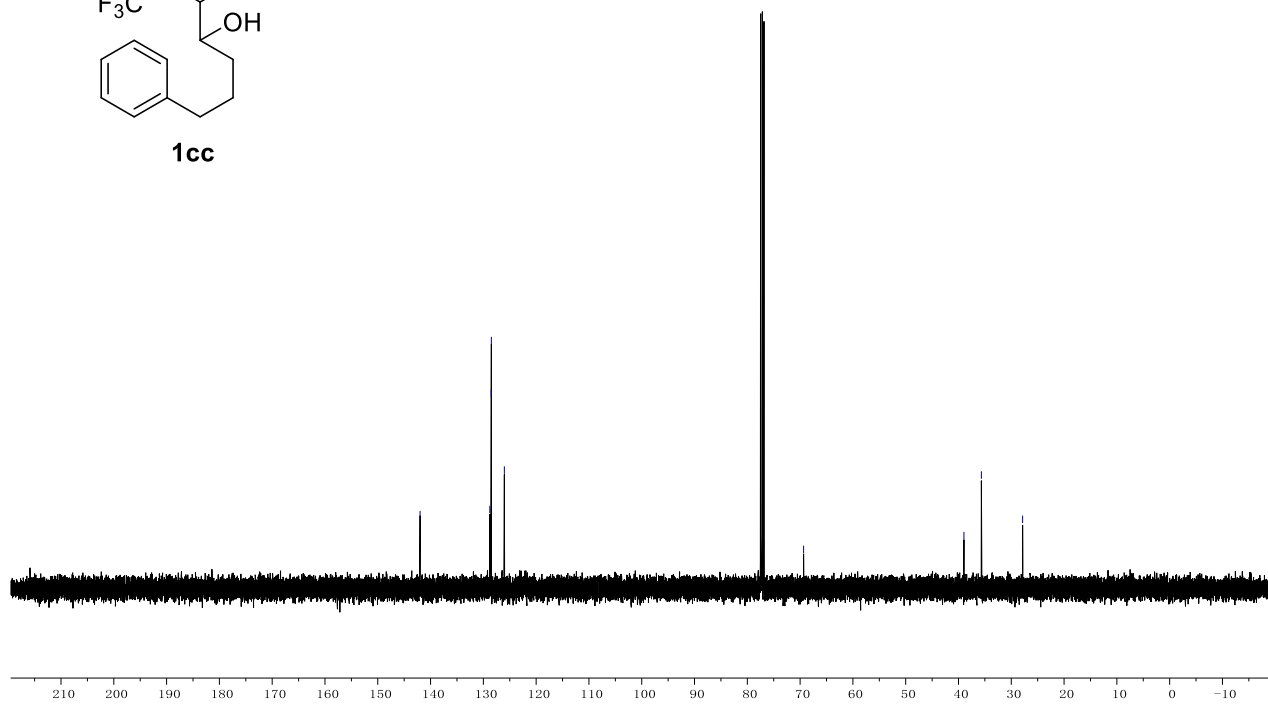



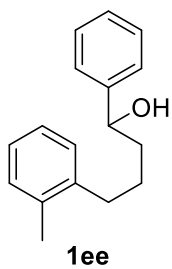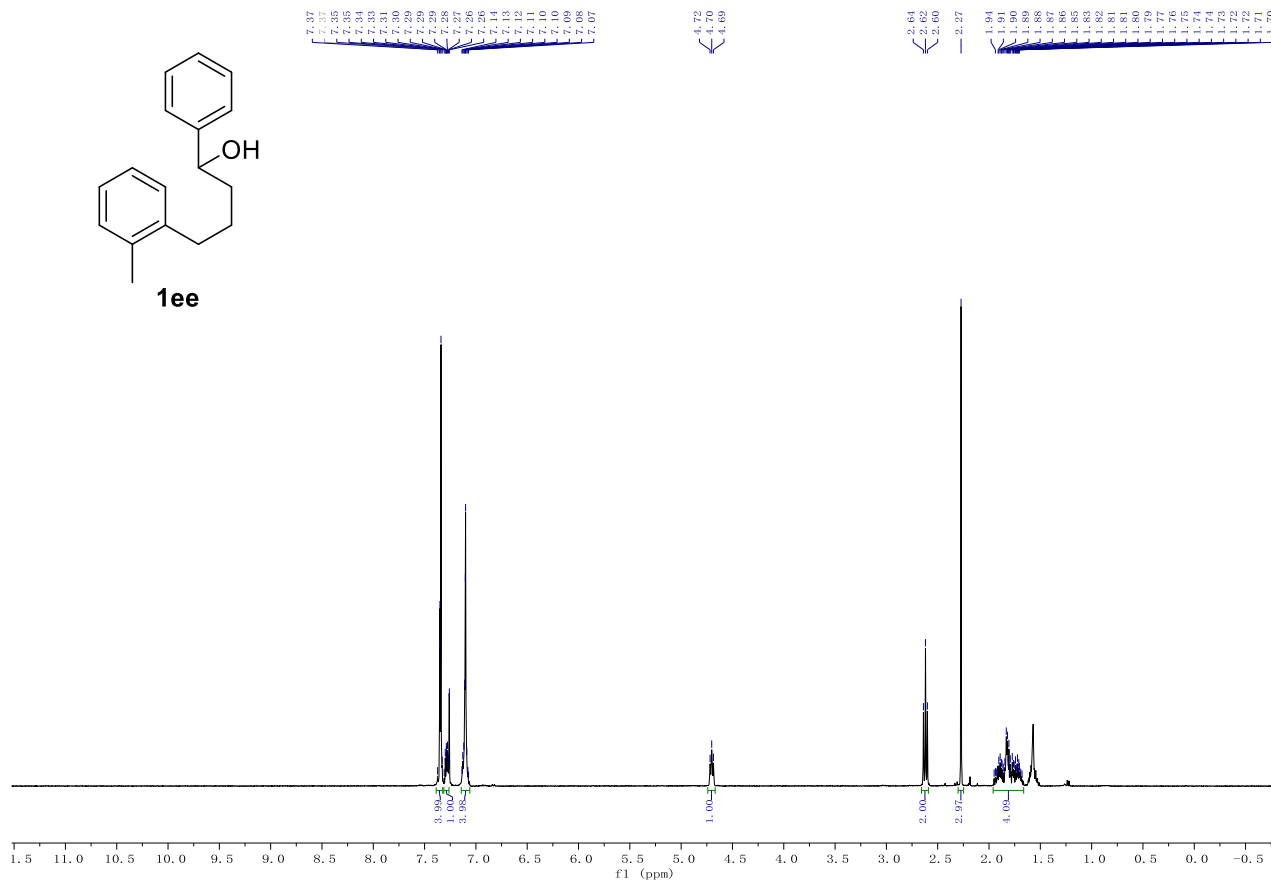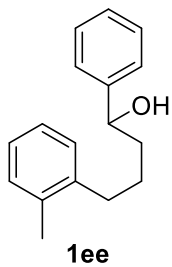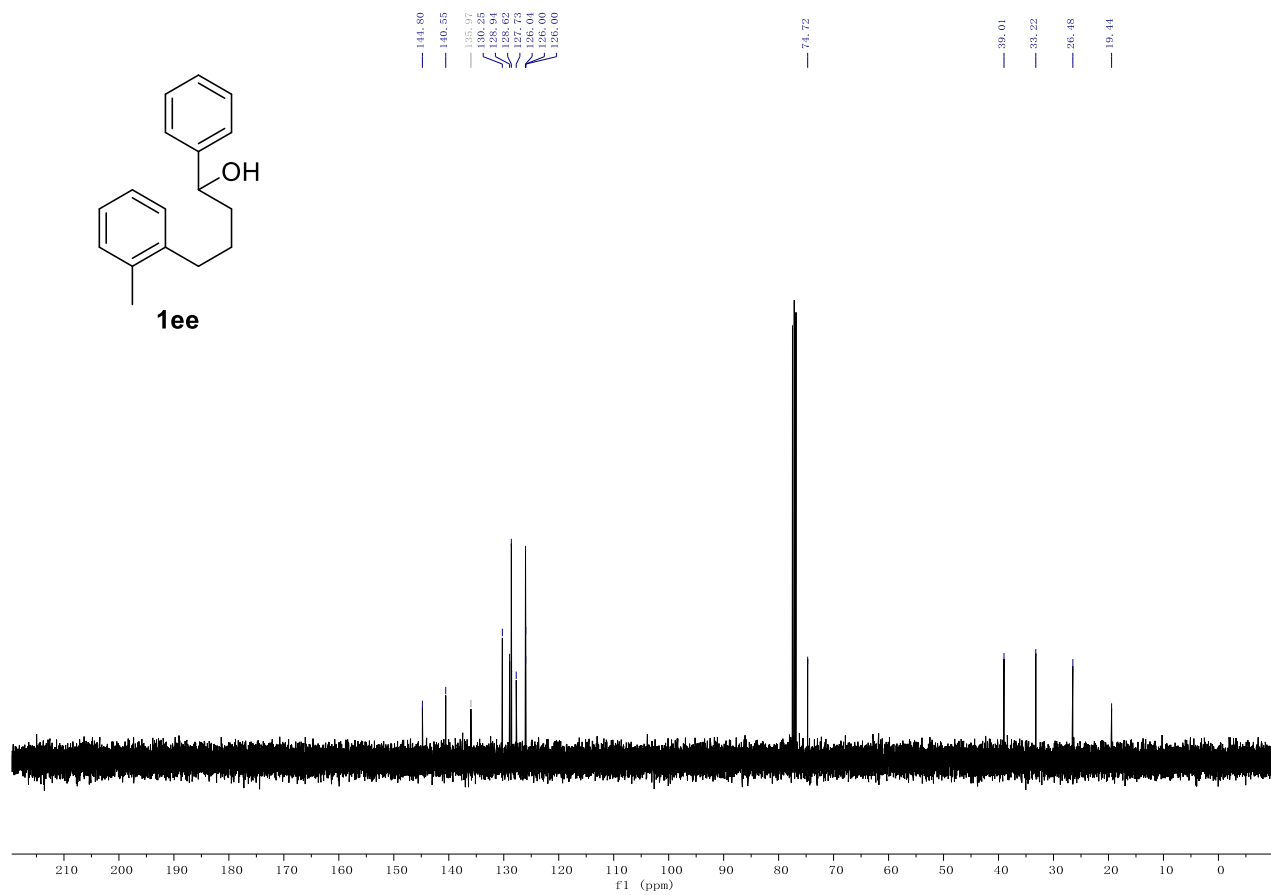

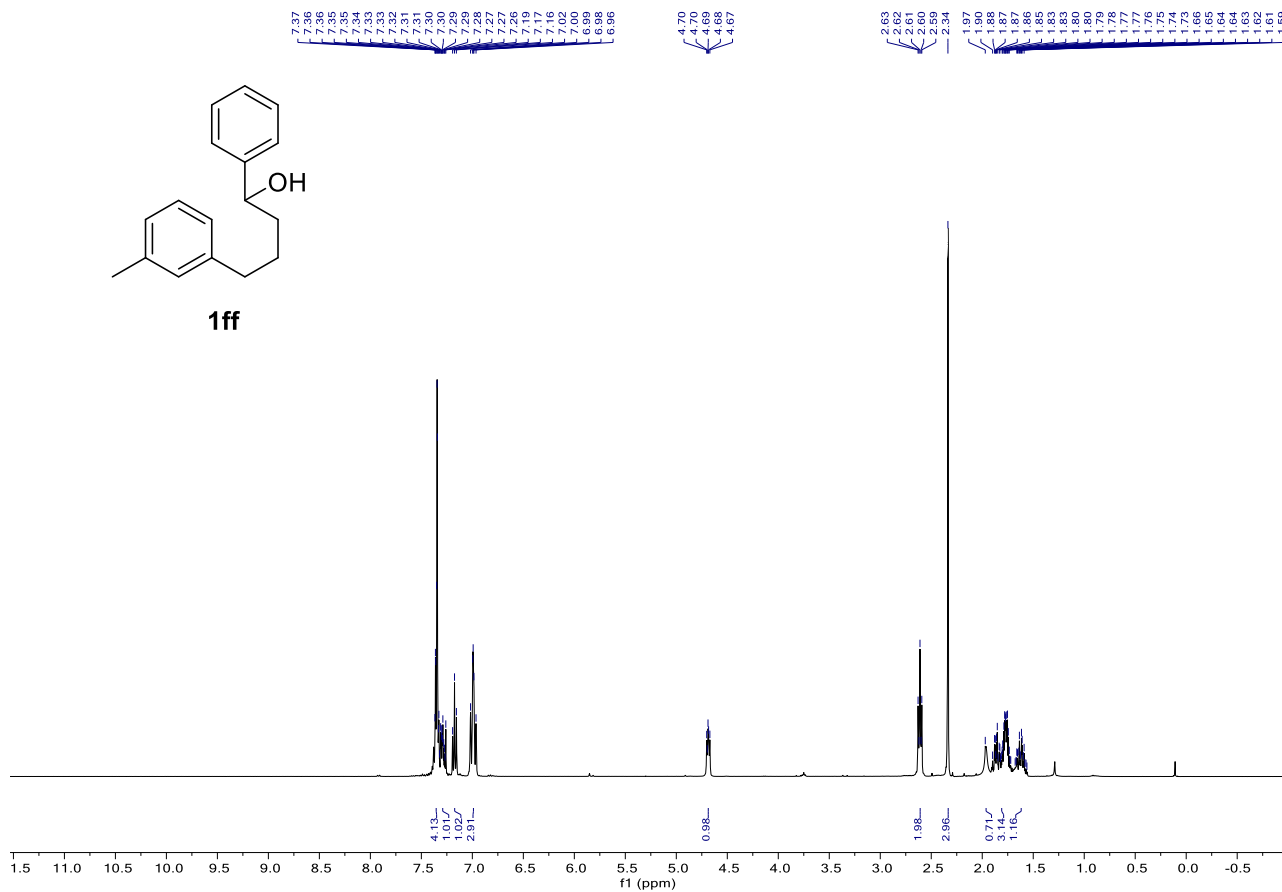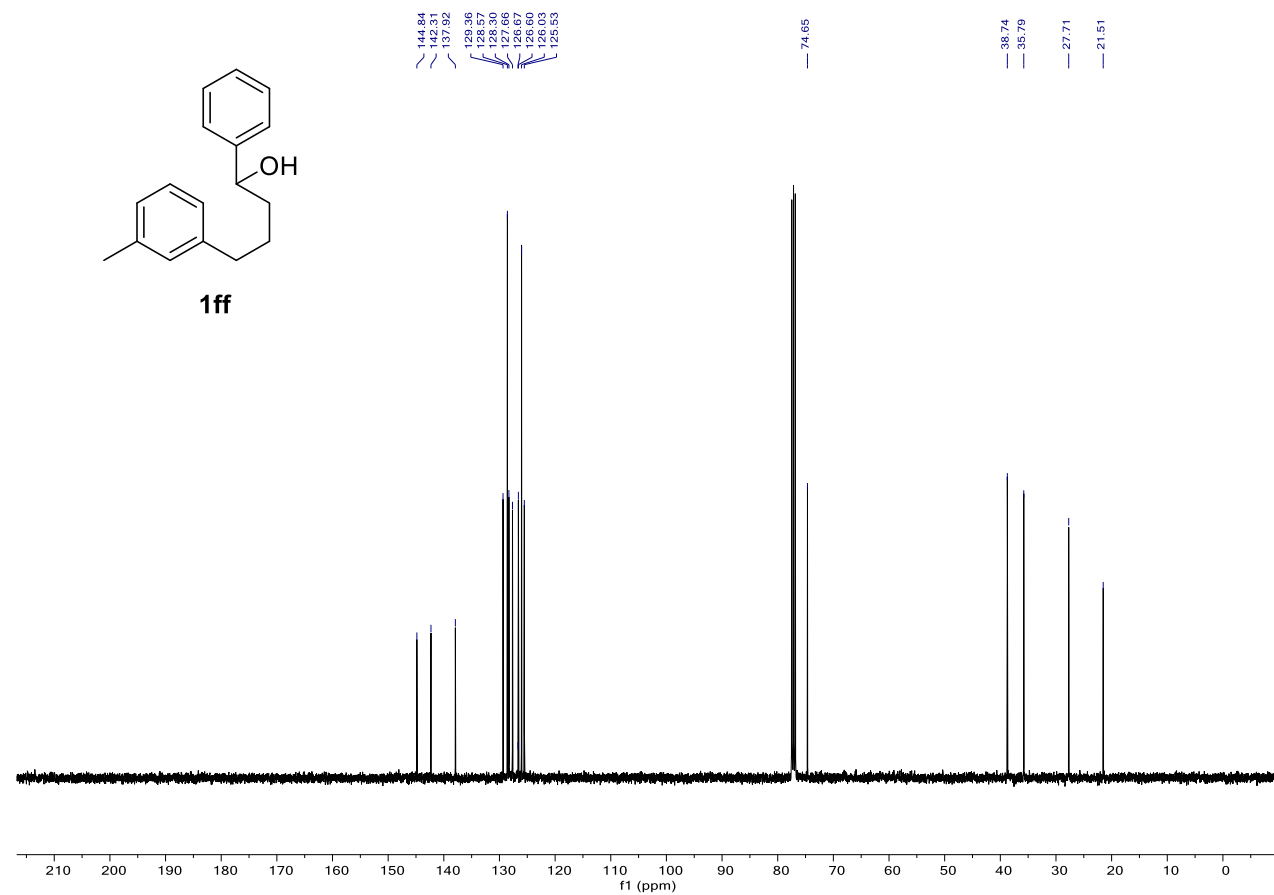

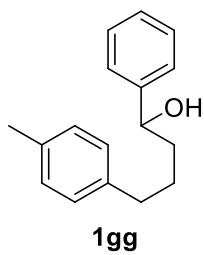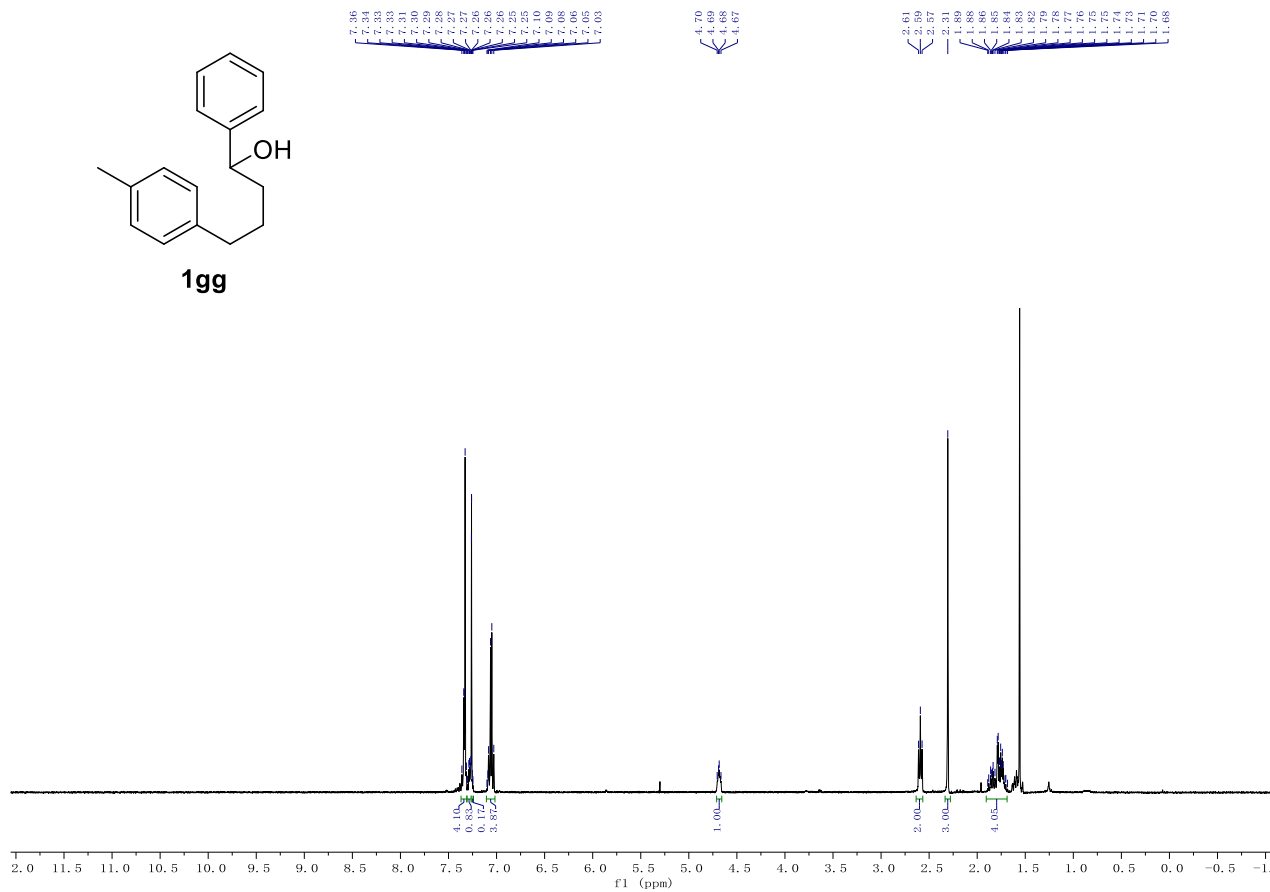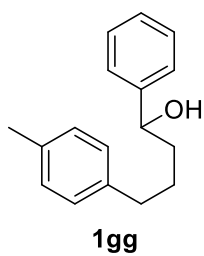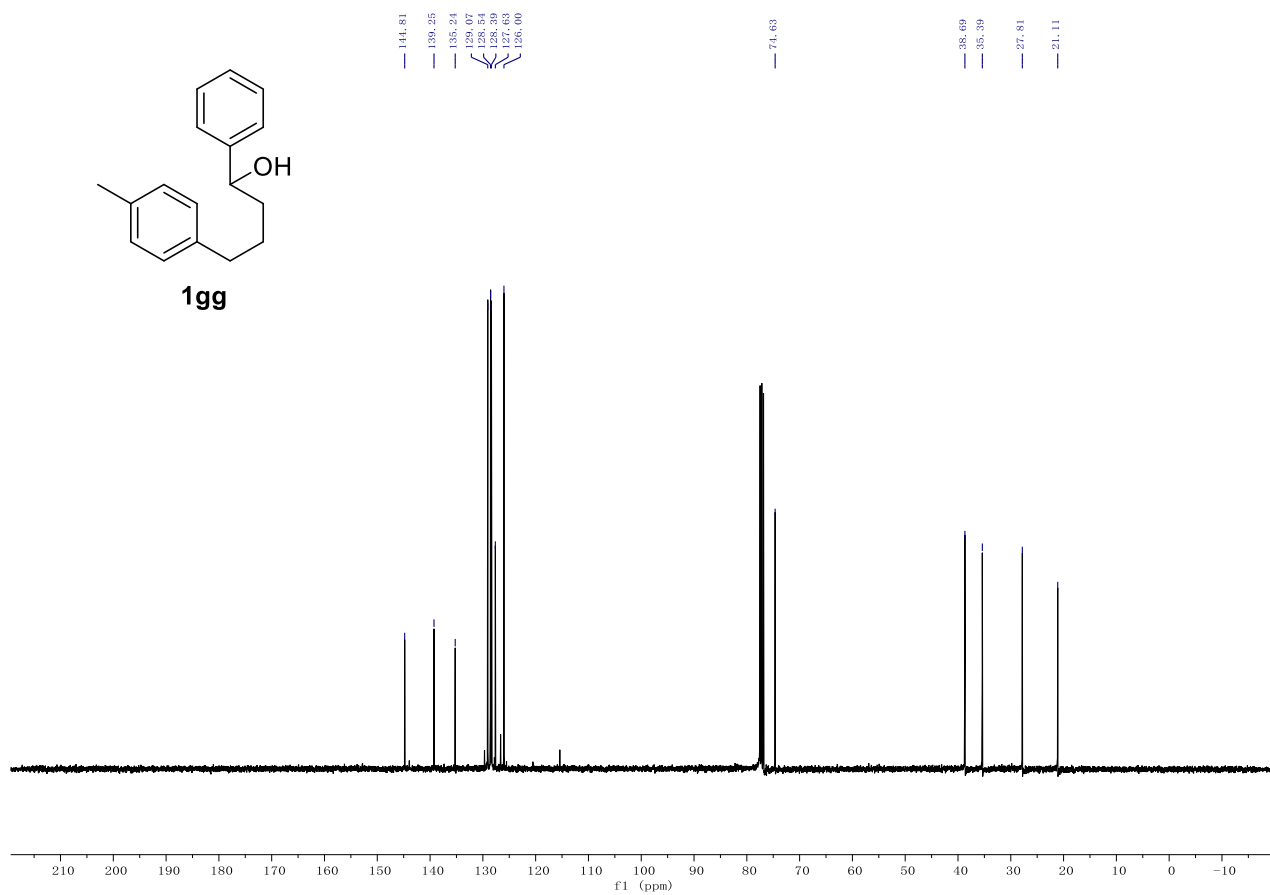



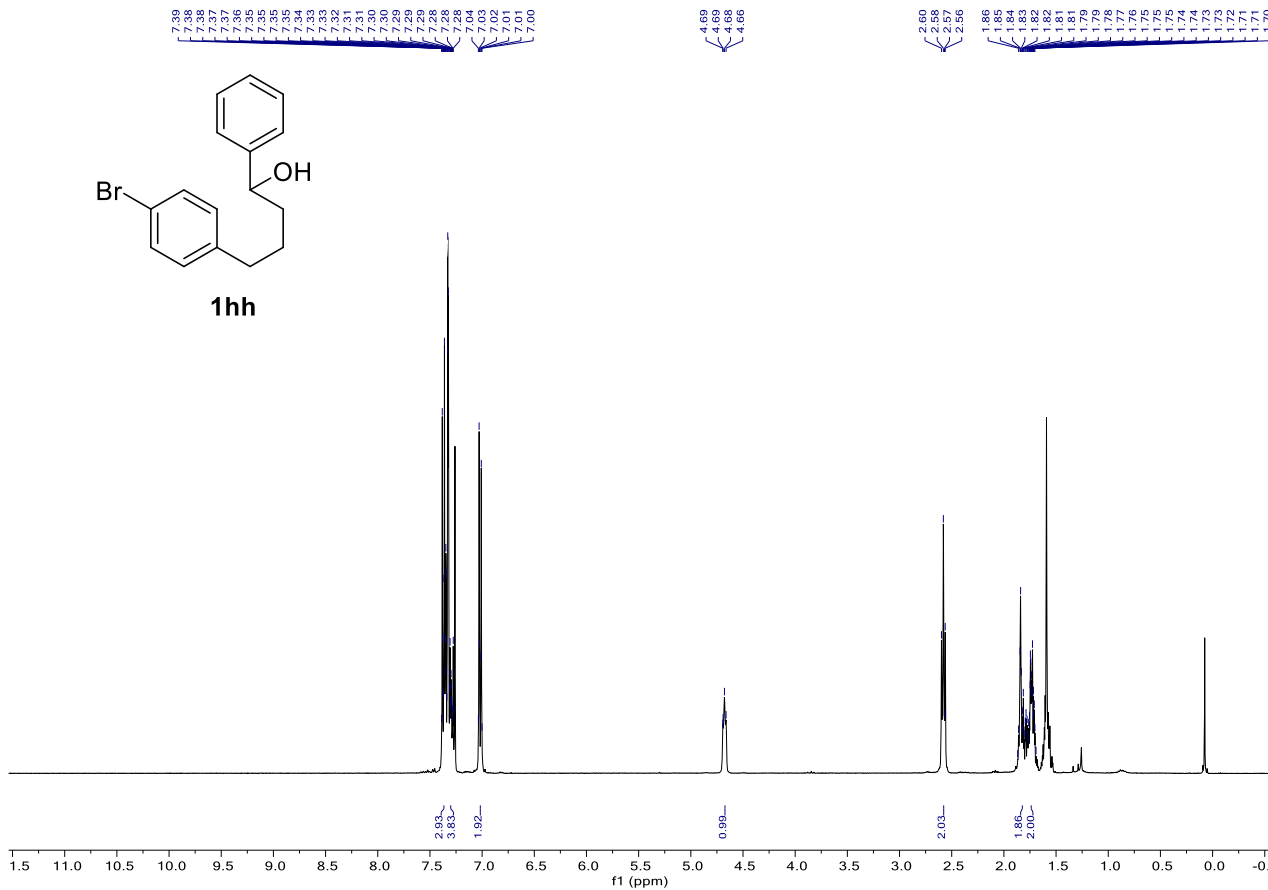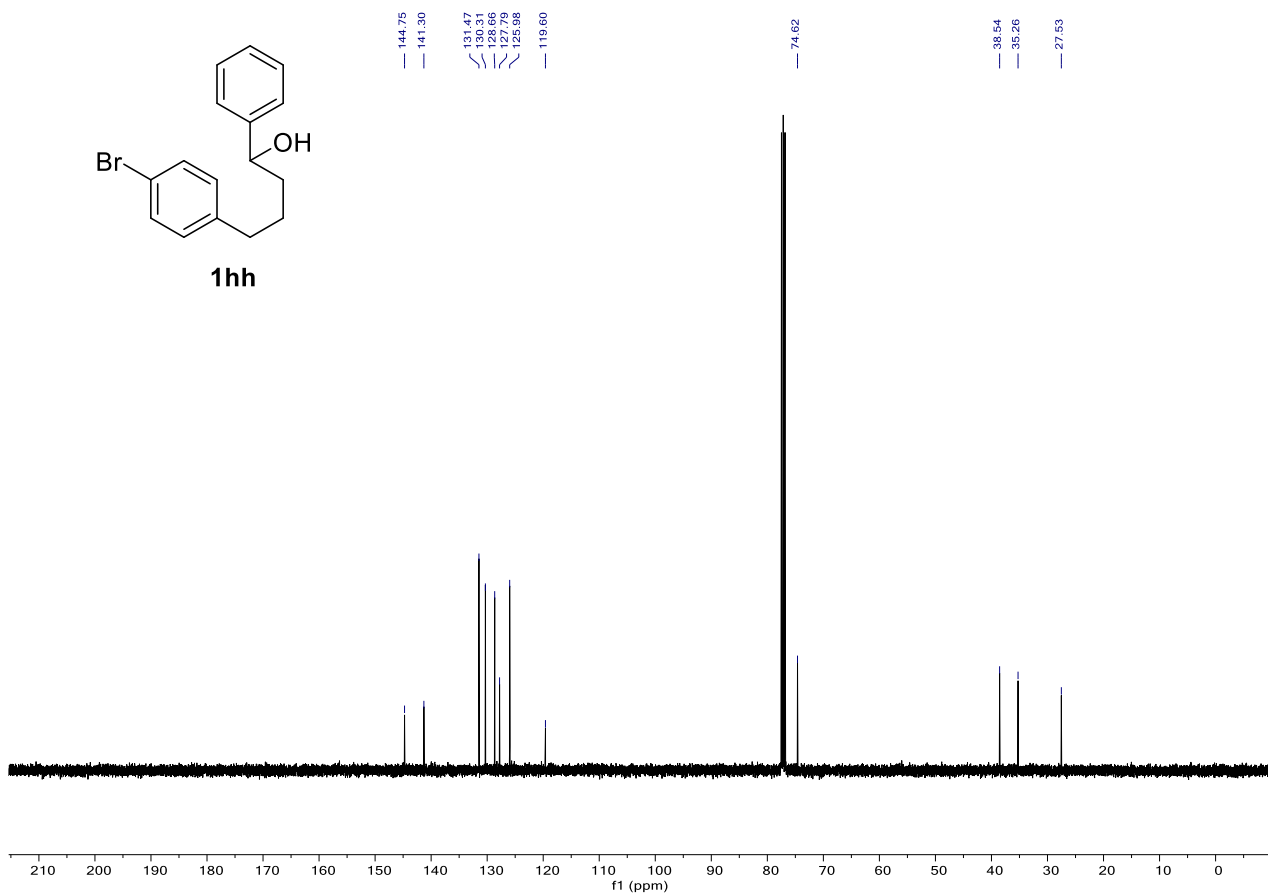

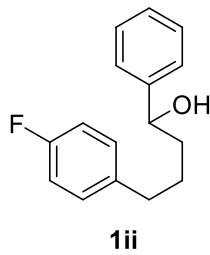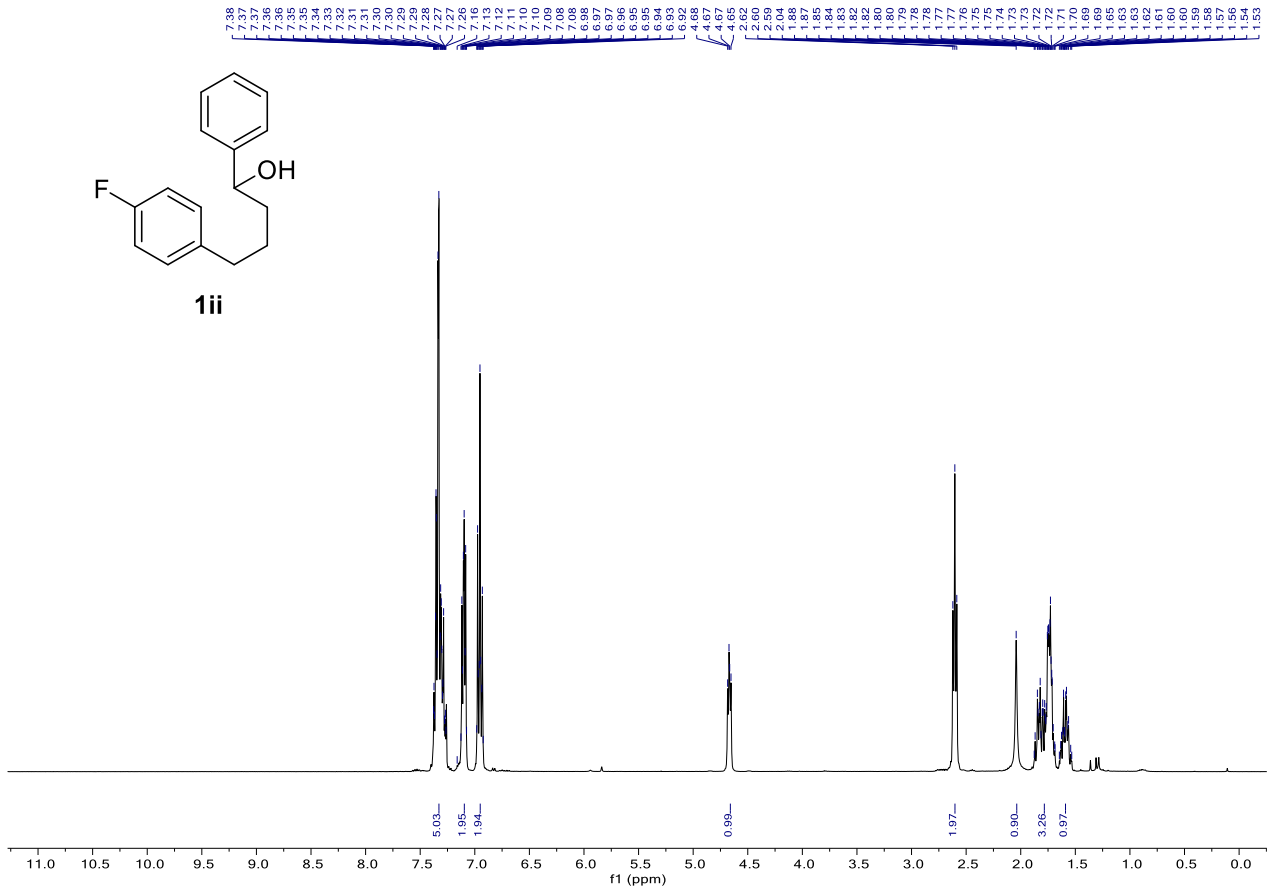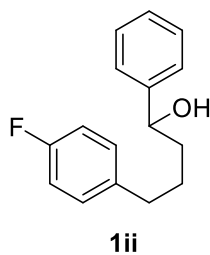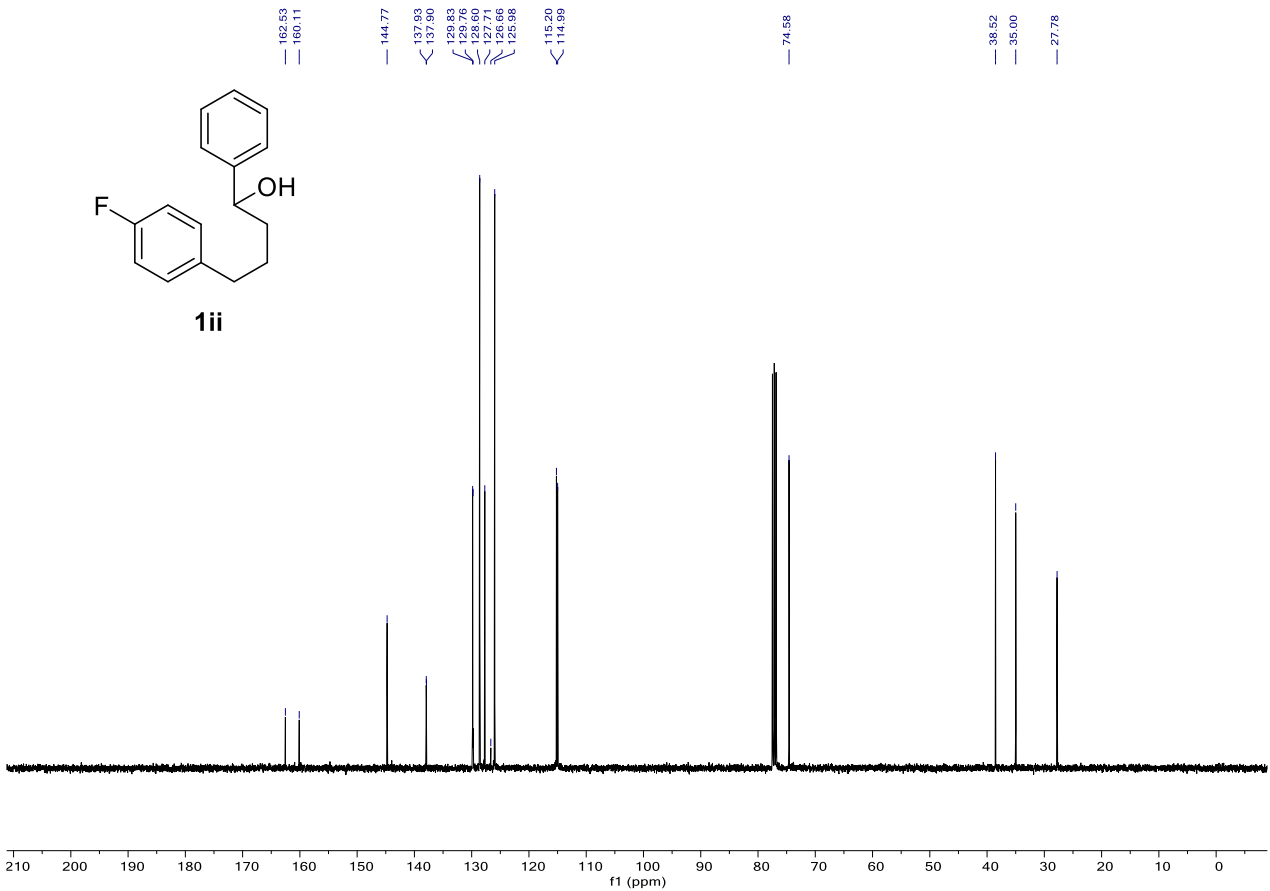

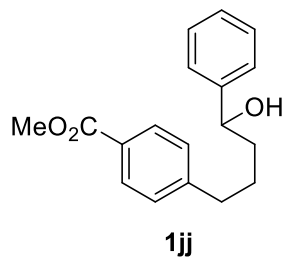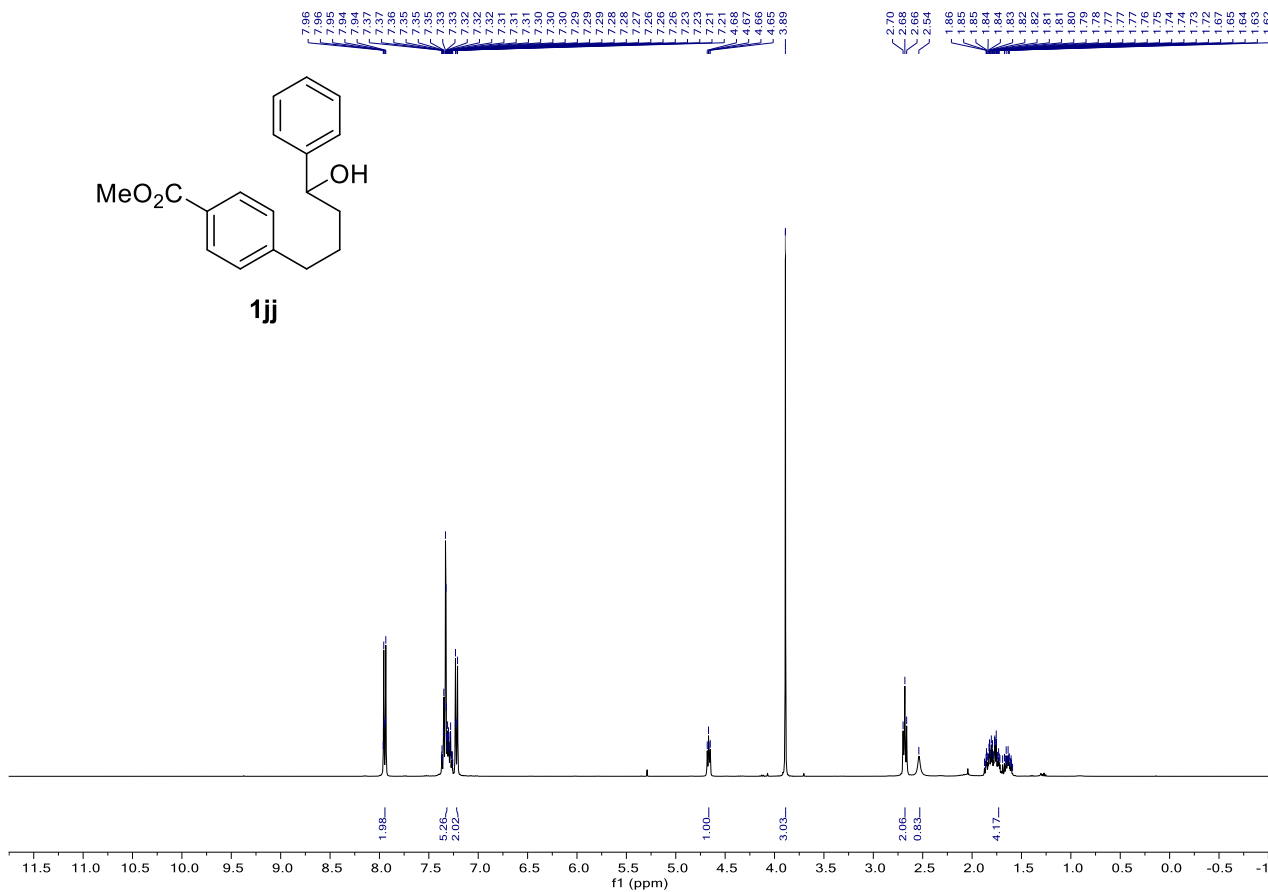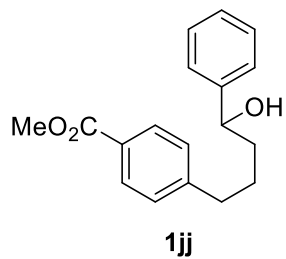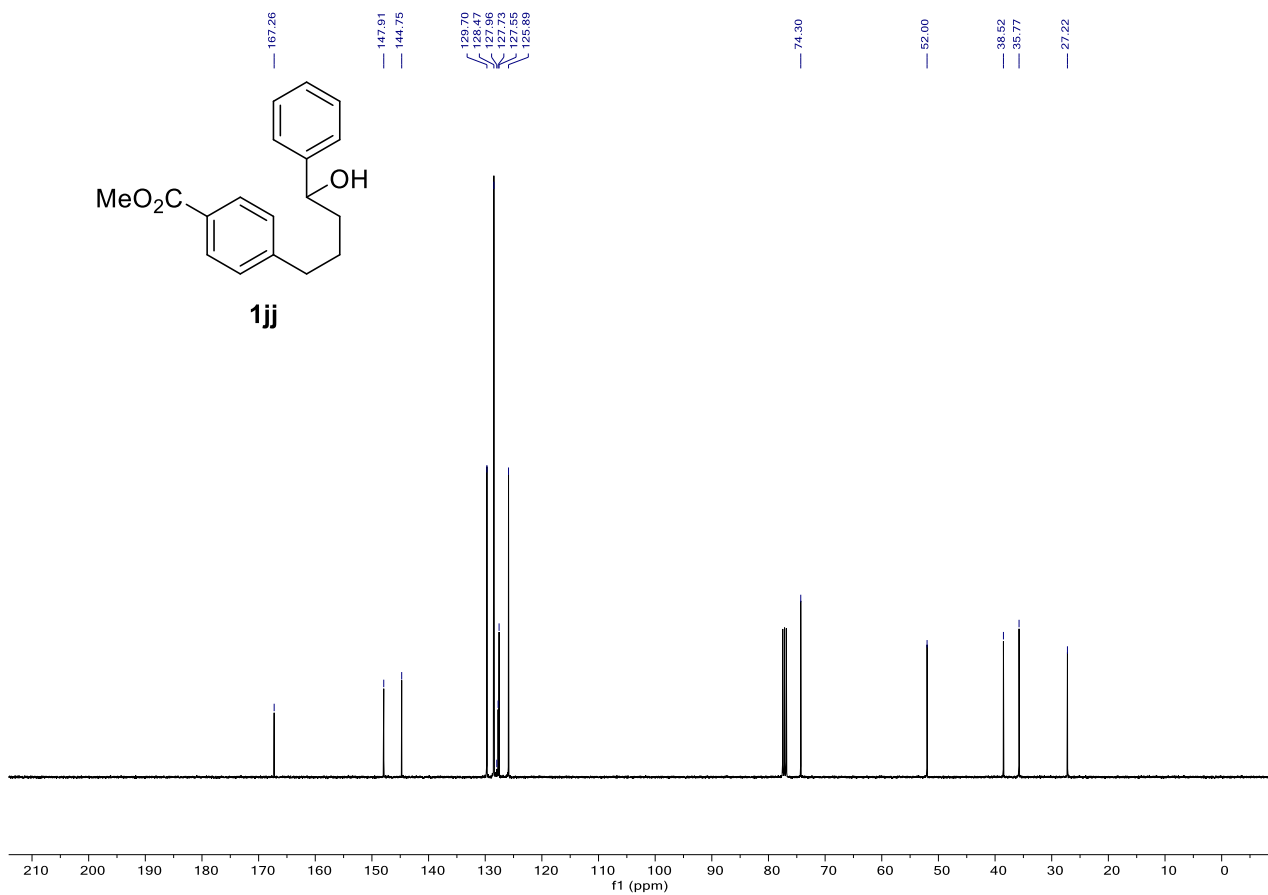

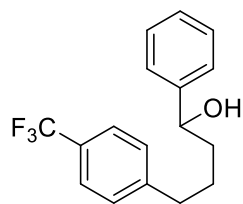

**1kk**

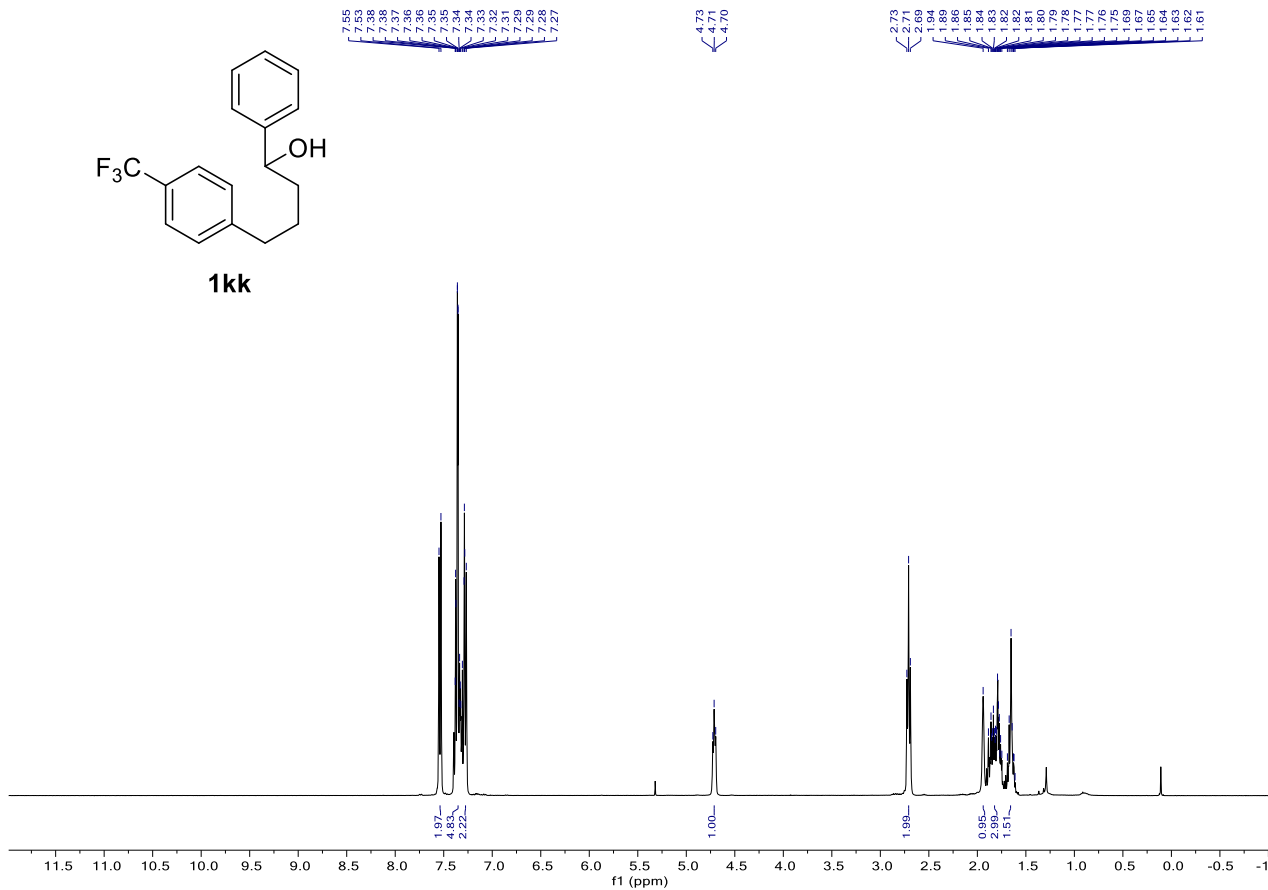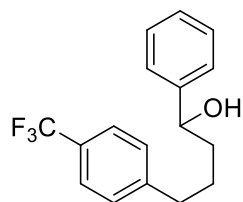

**1kk**

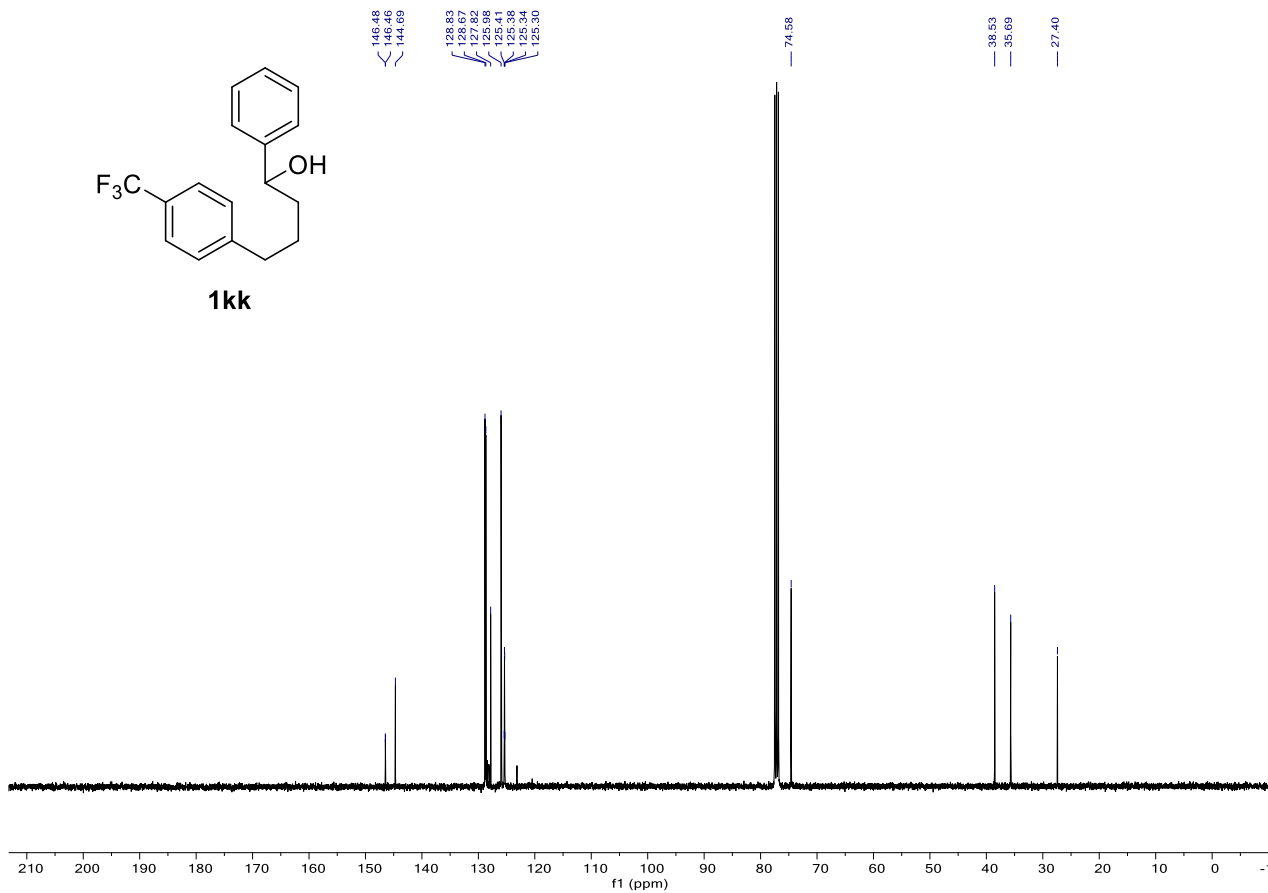

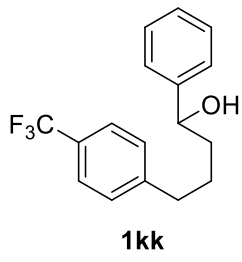

-62.25

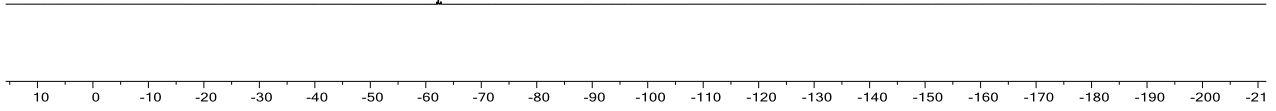

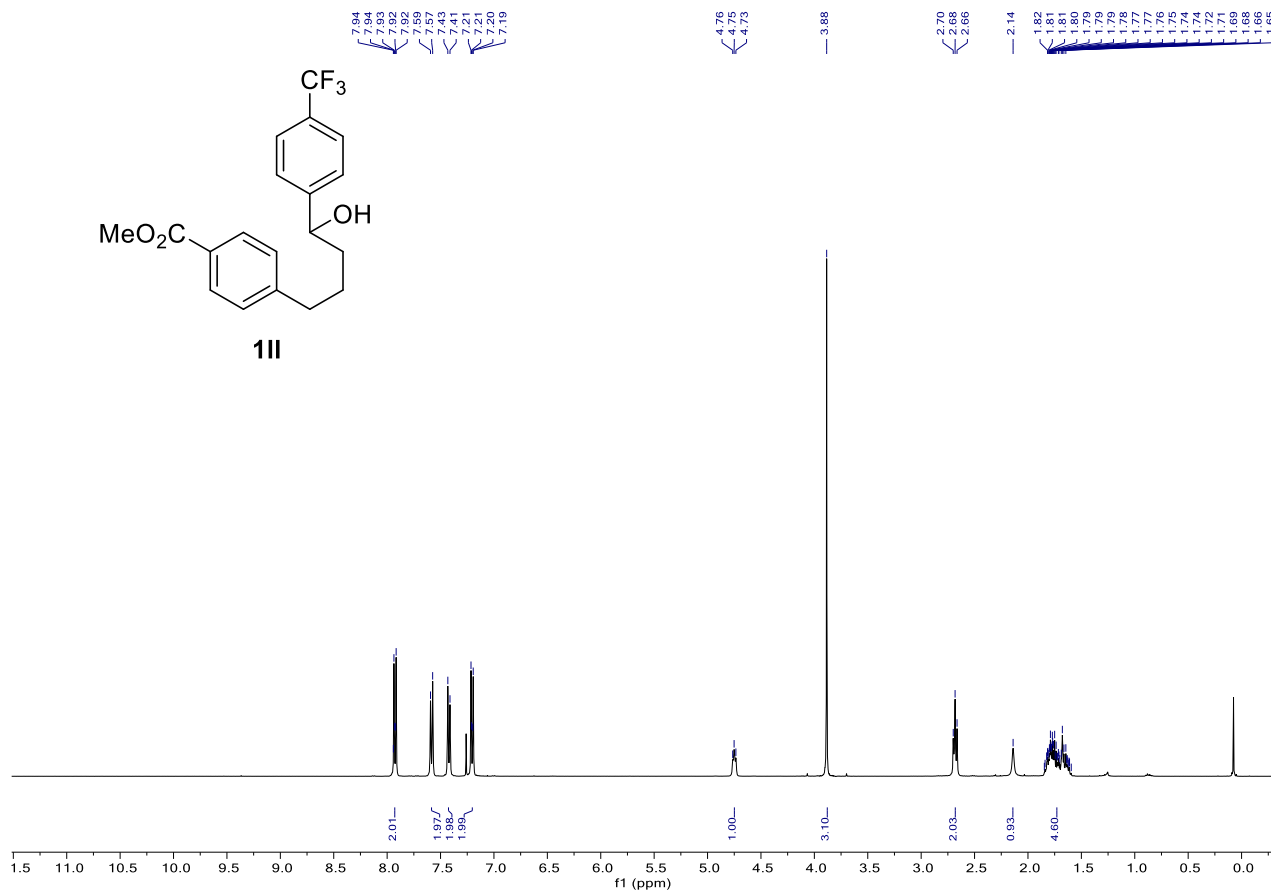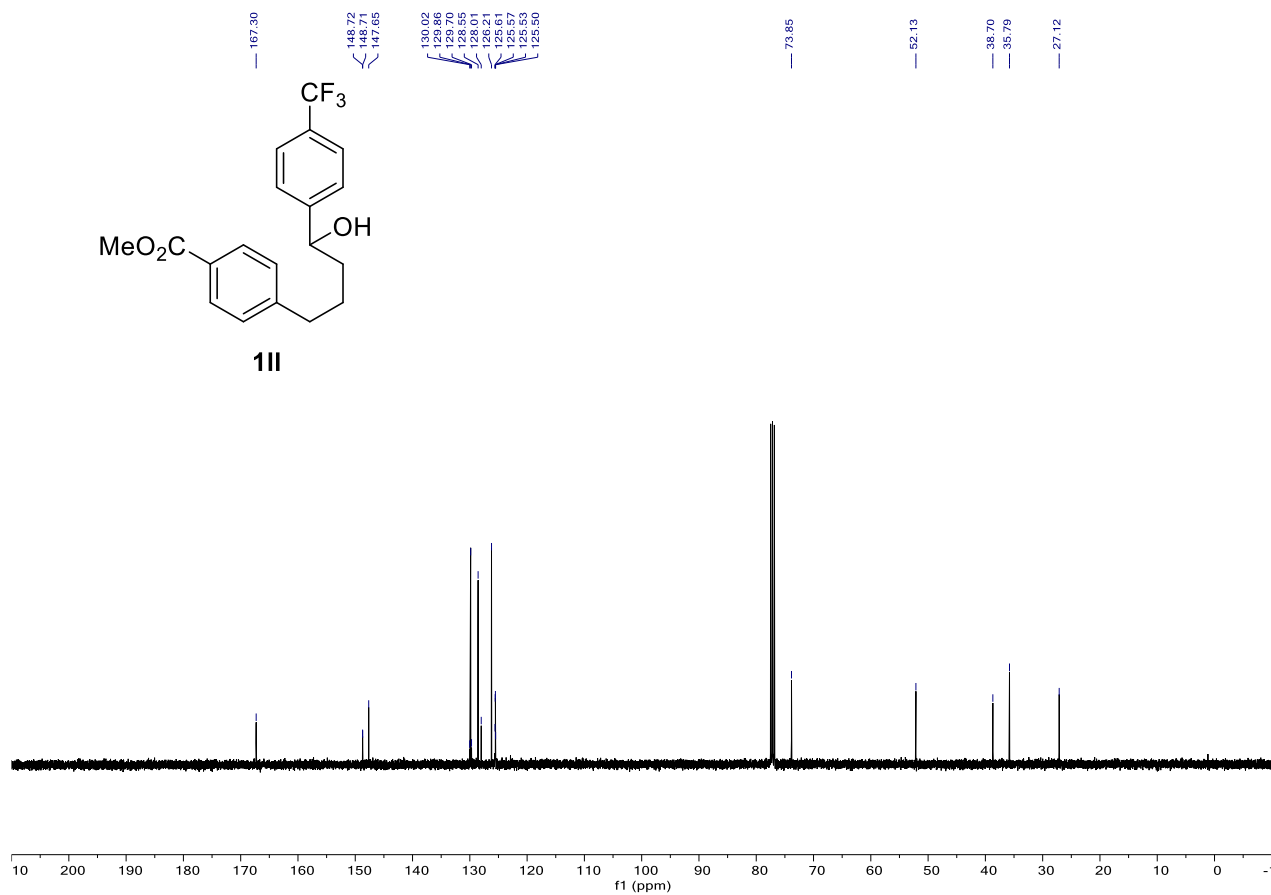

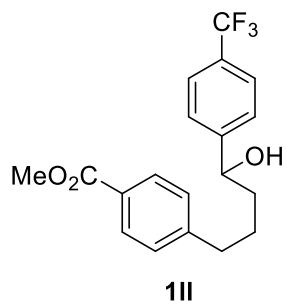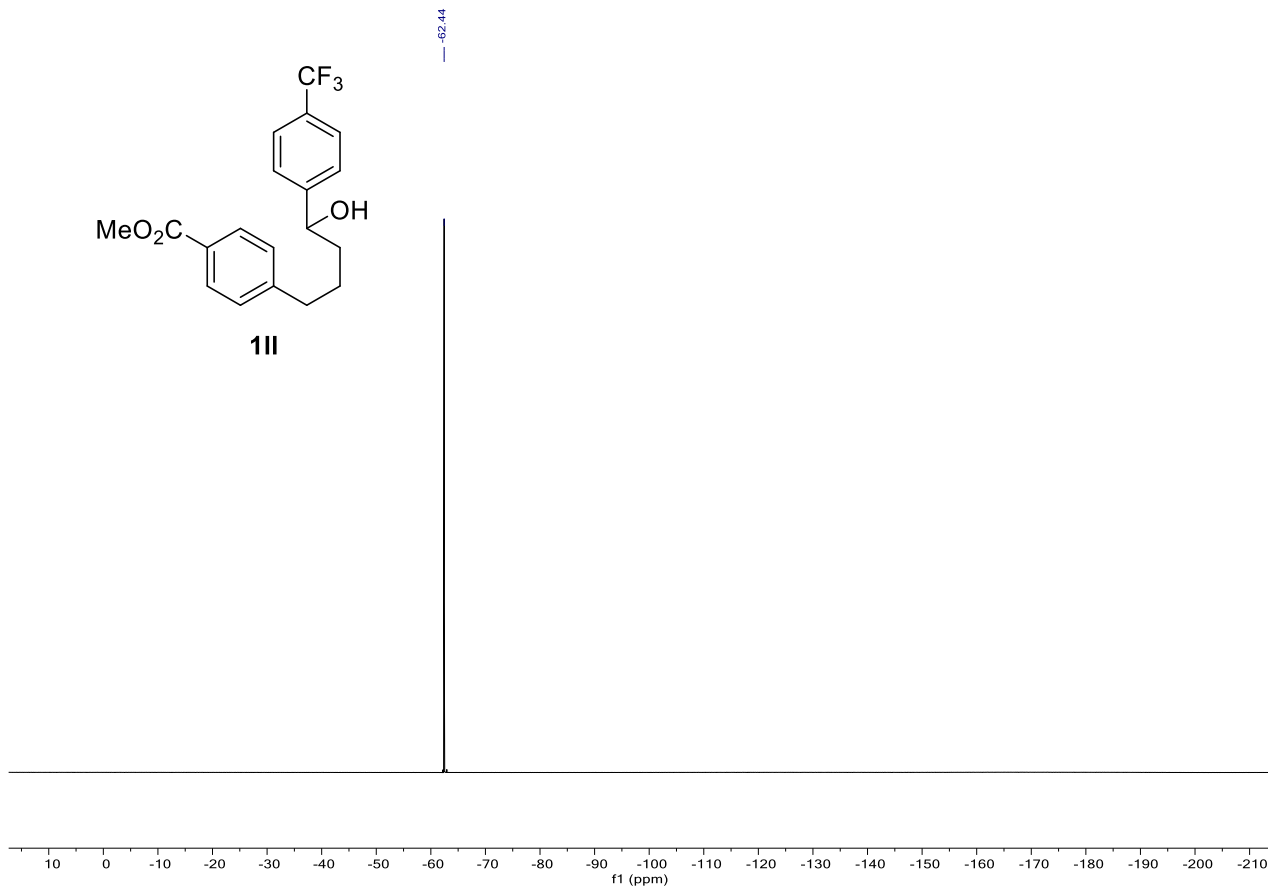

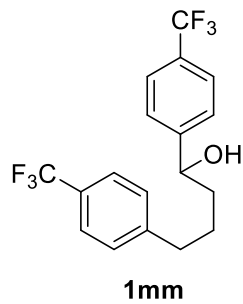

7.63  
7.56  
7.55  
7.53  
7.47  
7.45  
7.28  
7.27

4.80  
4.79  
4.78  
4.77  
4.77

2.73  
2.71  
2.70  
2.05  
2.04  
2.04  
1.85  
1.85  
1.84  
1.83  
1.82  
1.81  
1.81  
1.80  
1.80  
1.79  
1.77  
1.76  
1.76  
1.75  
1.75  
1.69  
1.69  
1.67  
1.67  
1.66  
1.65  
1.64

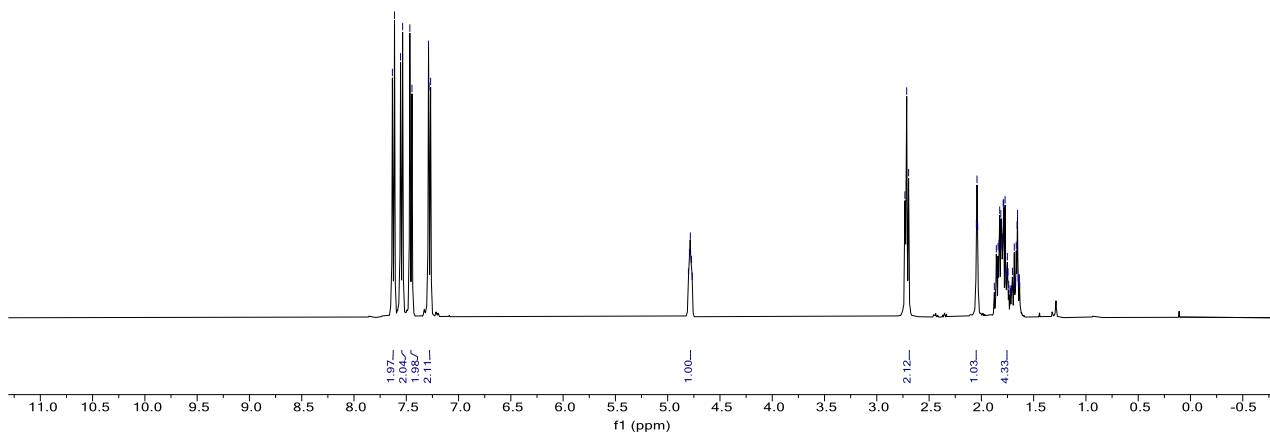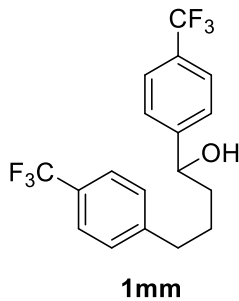

148.61  
146.21  
130.08  
130.08  
128.44  
128.44  
128.80  
128.80  
128.54  
128.22  
127.90  
127.90  
128.84  
128.84  
125.59  
125.59  
125.55  
125.55  
125.42  
125.42  
125.38  
125.38  
123.14  
122.91

73.88

38.61

35.88

27.17

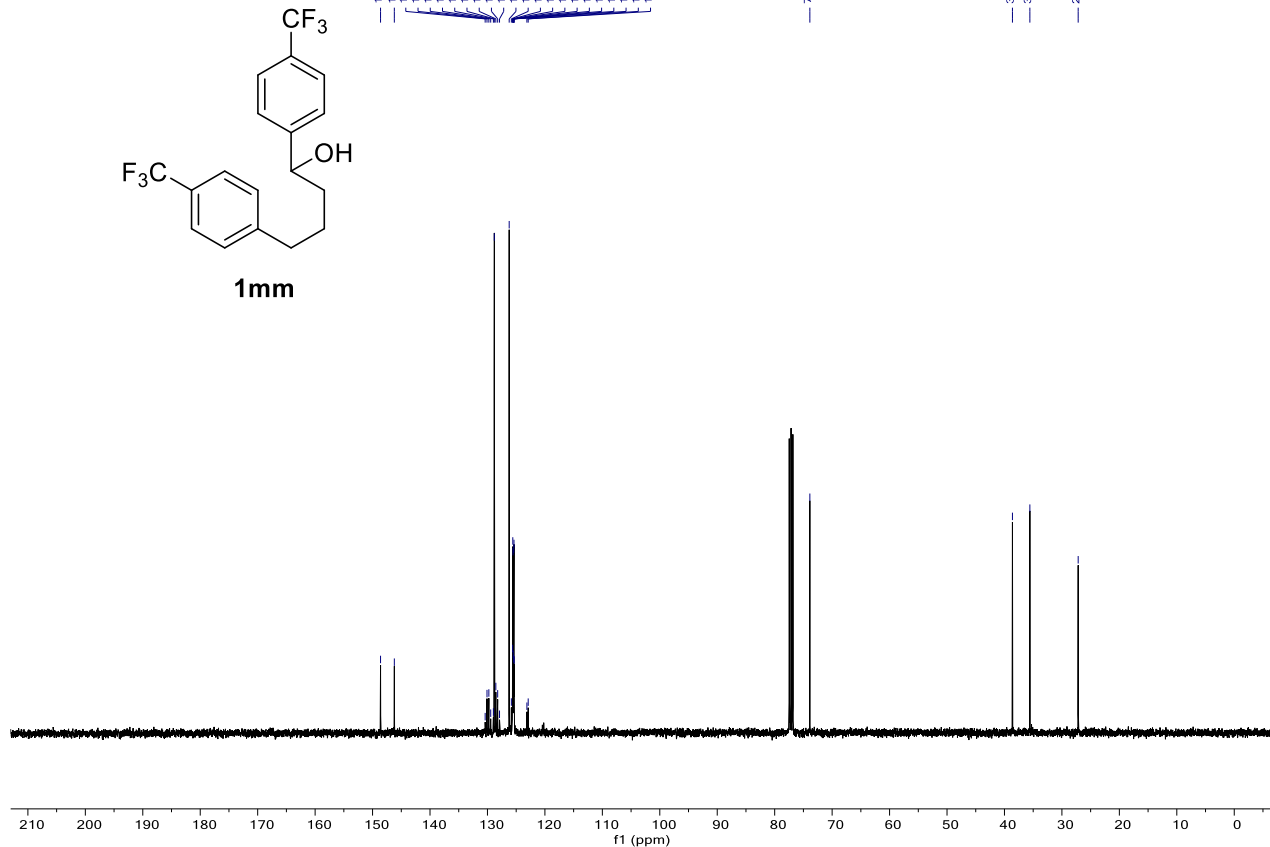





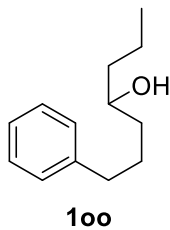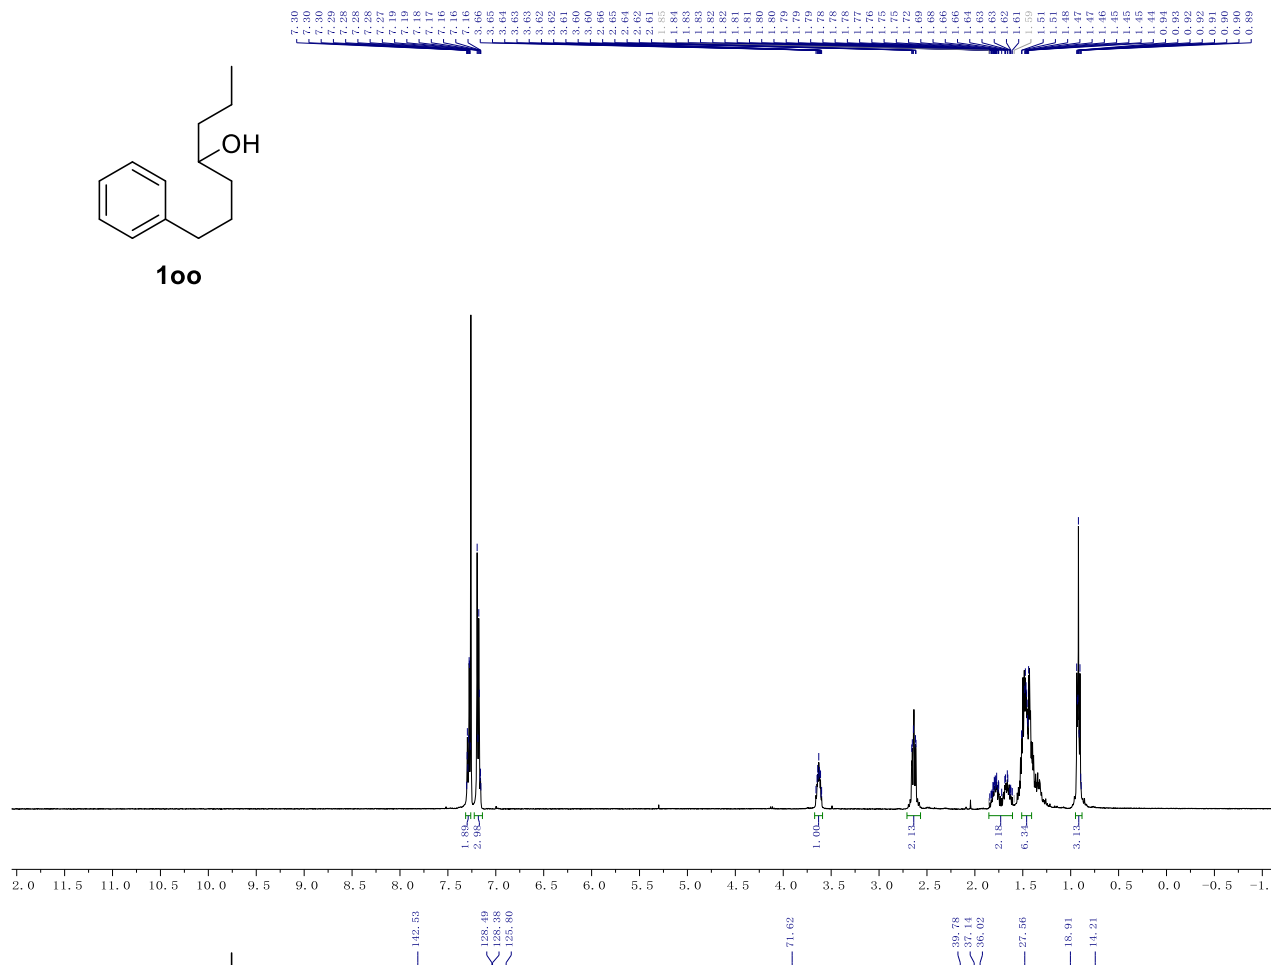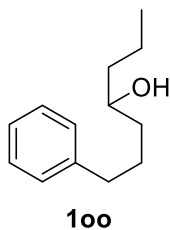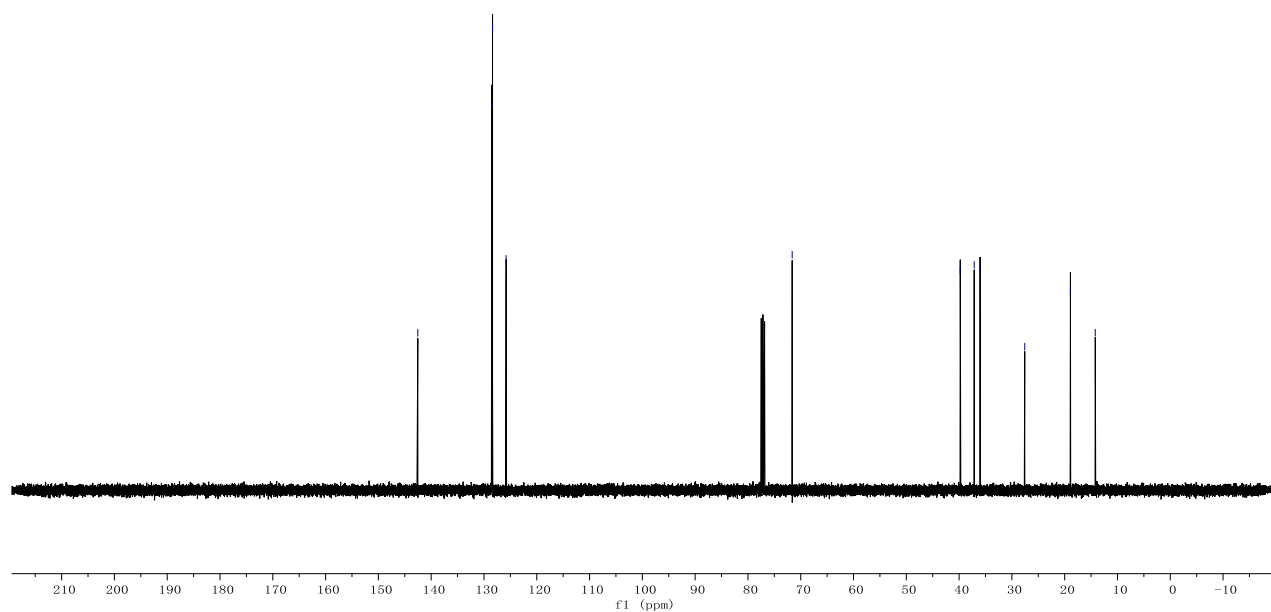

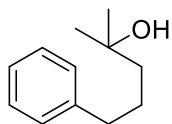

1pp

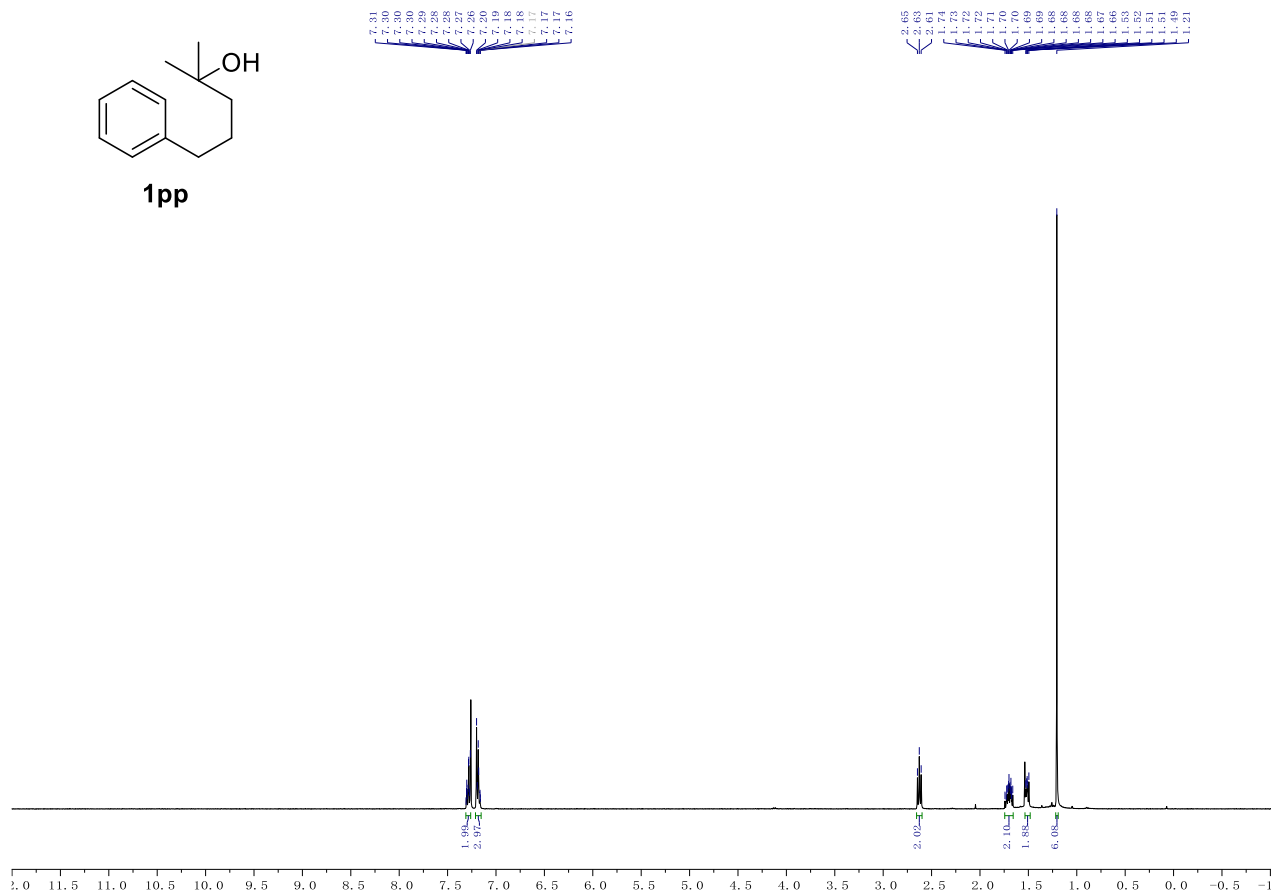

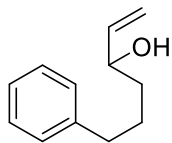

1qq

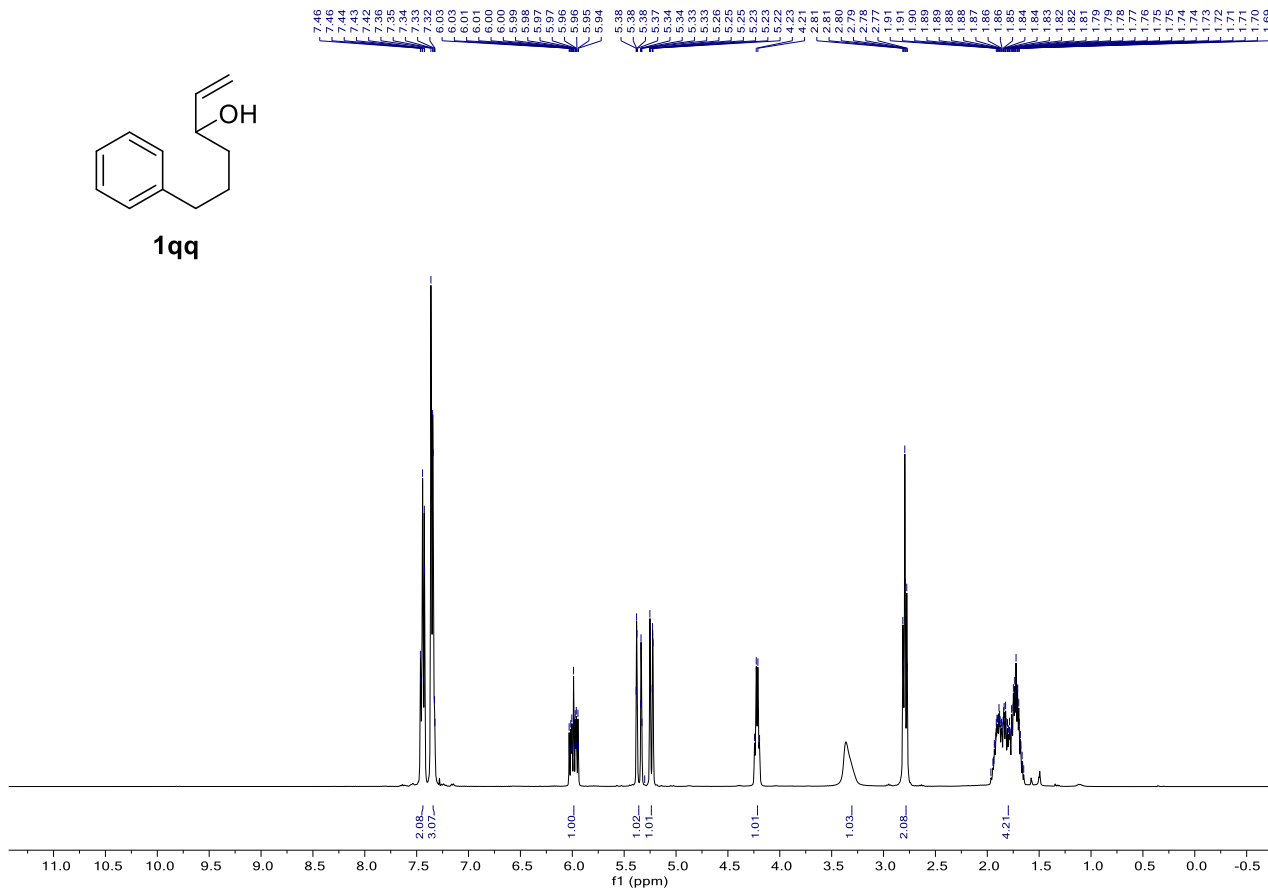

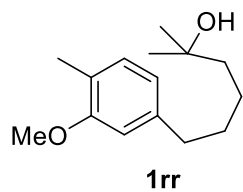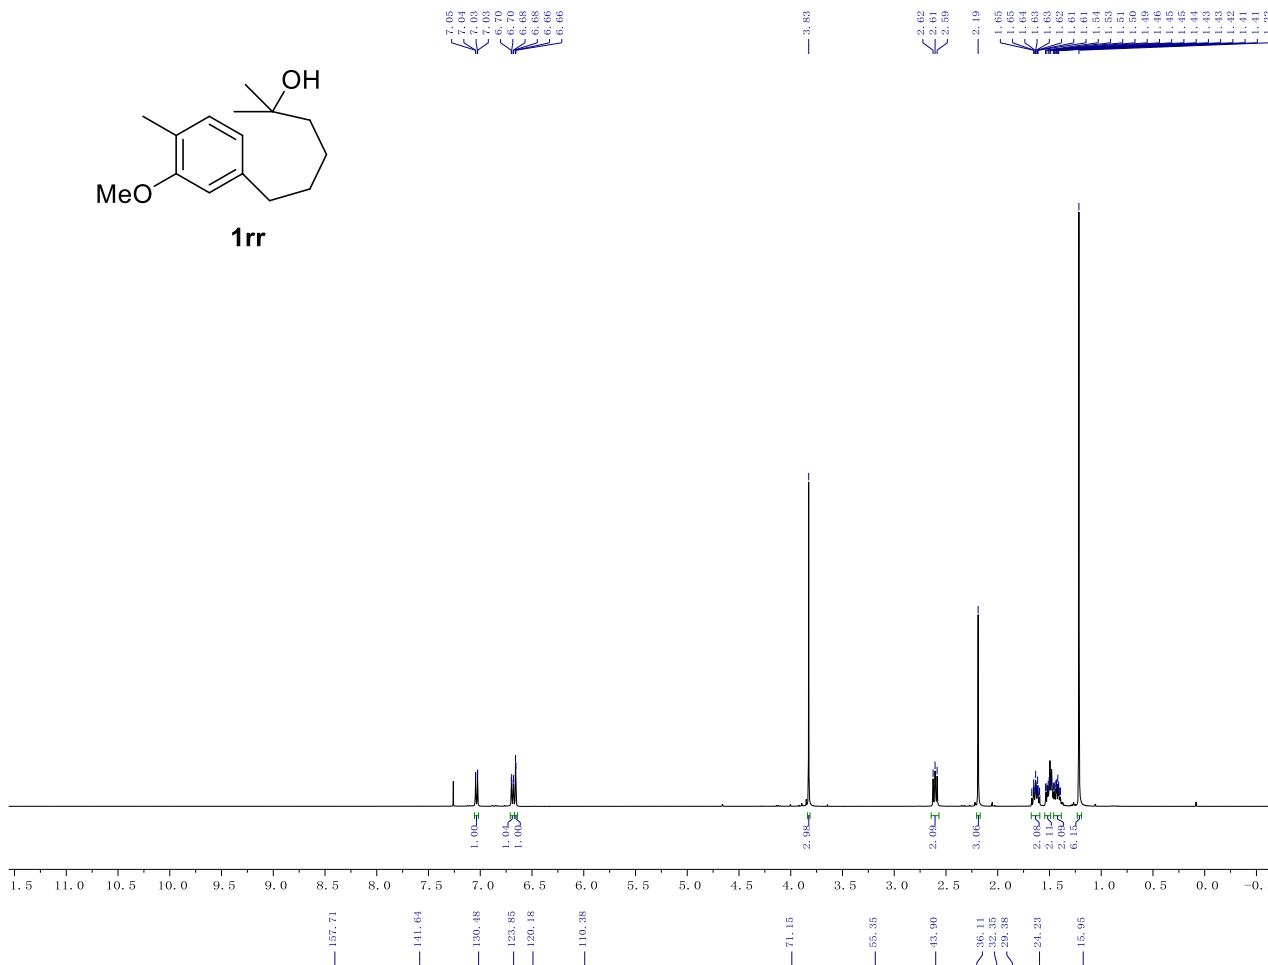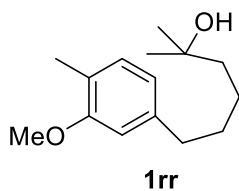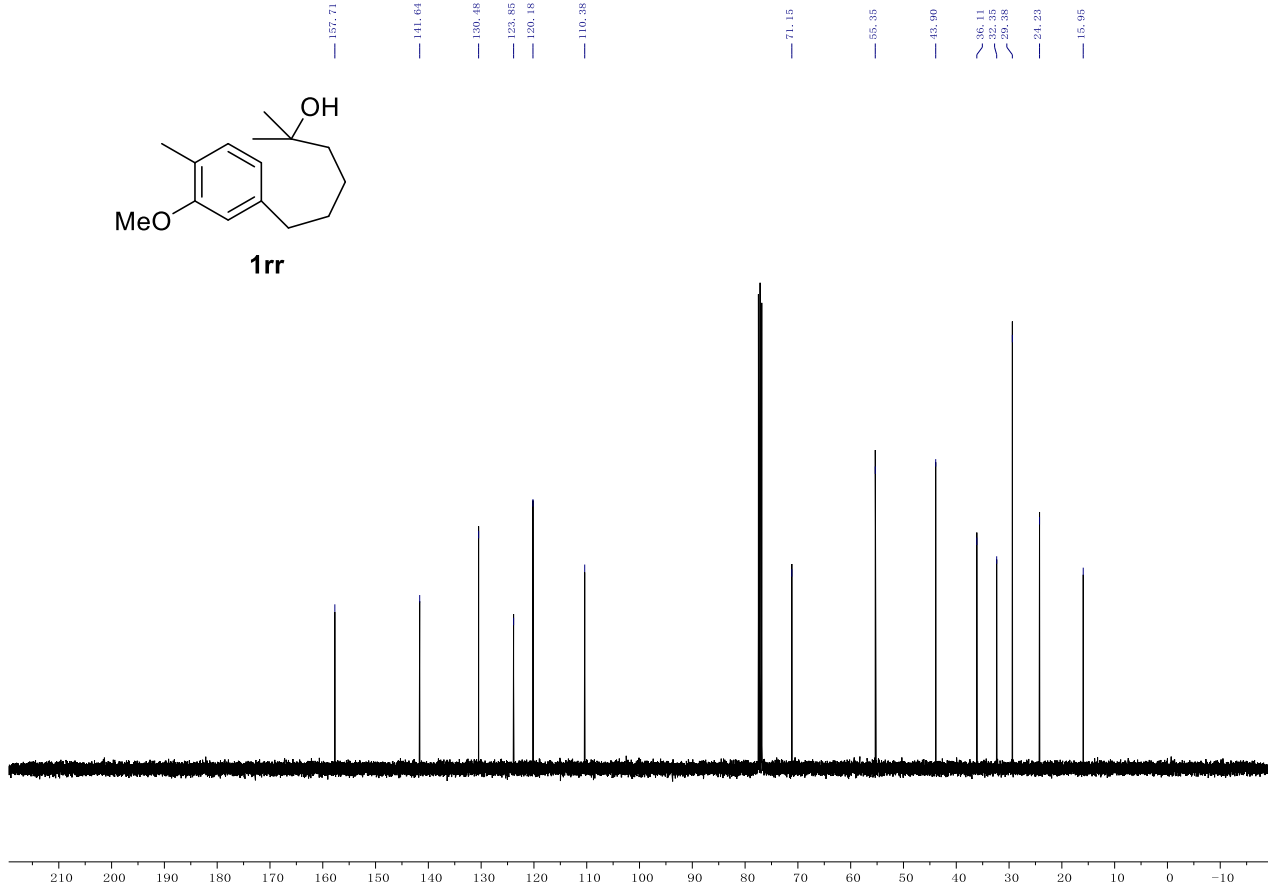



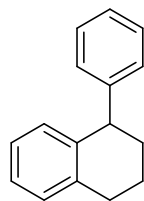

**2b**

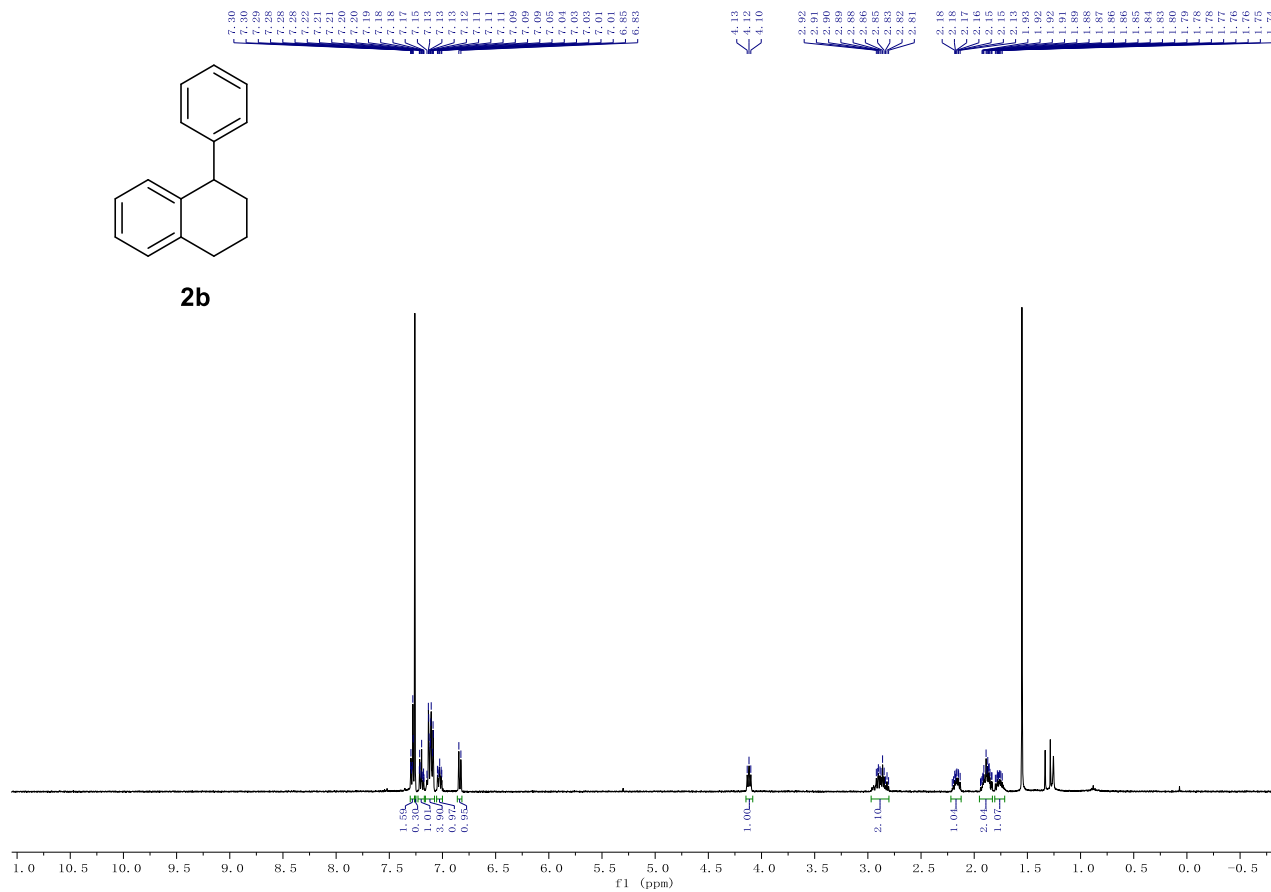





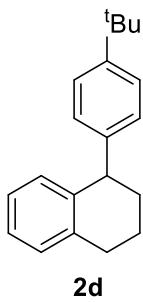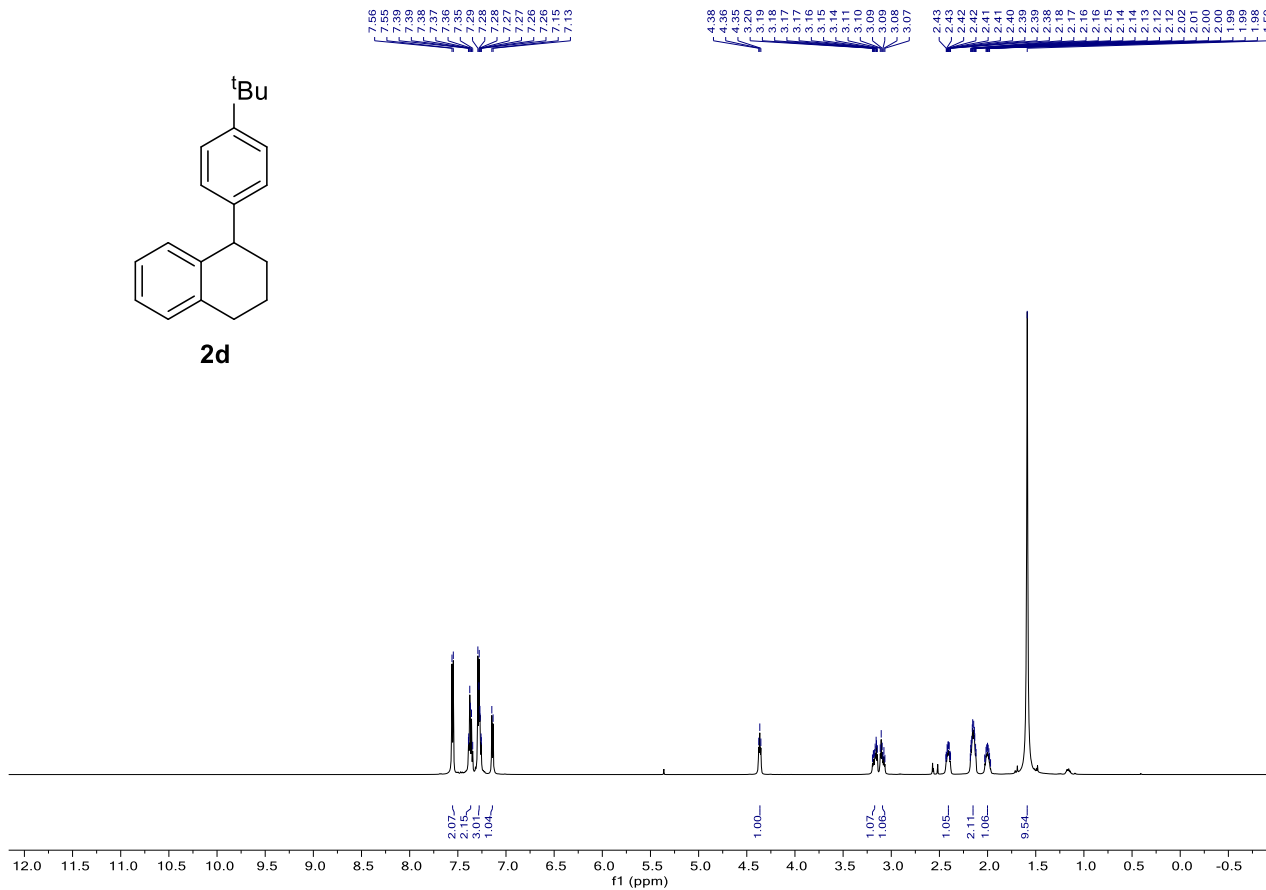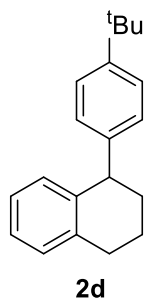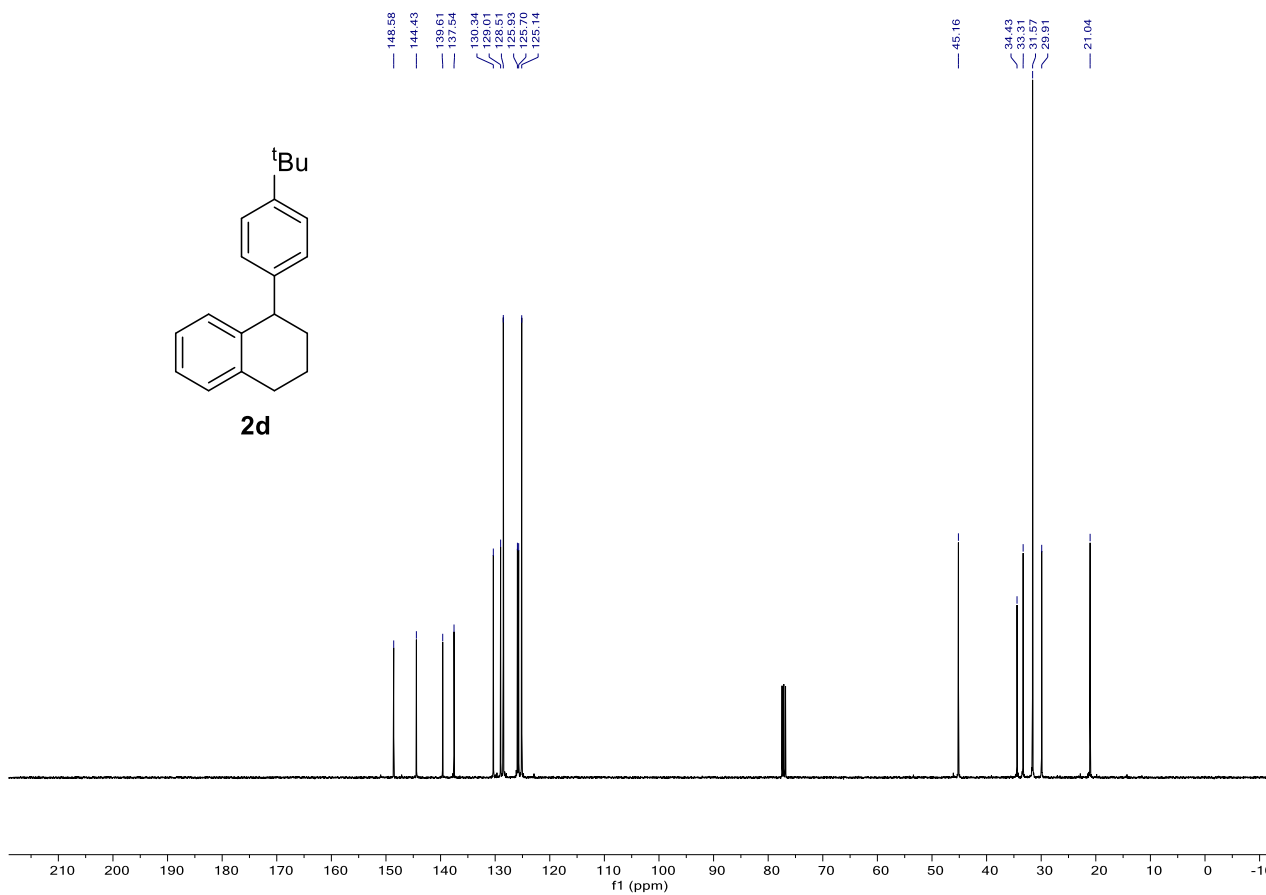

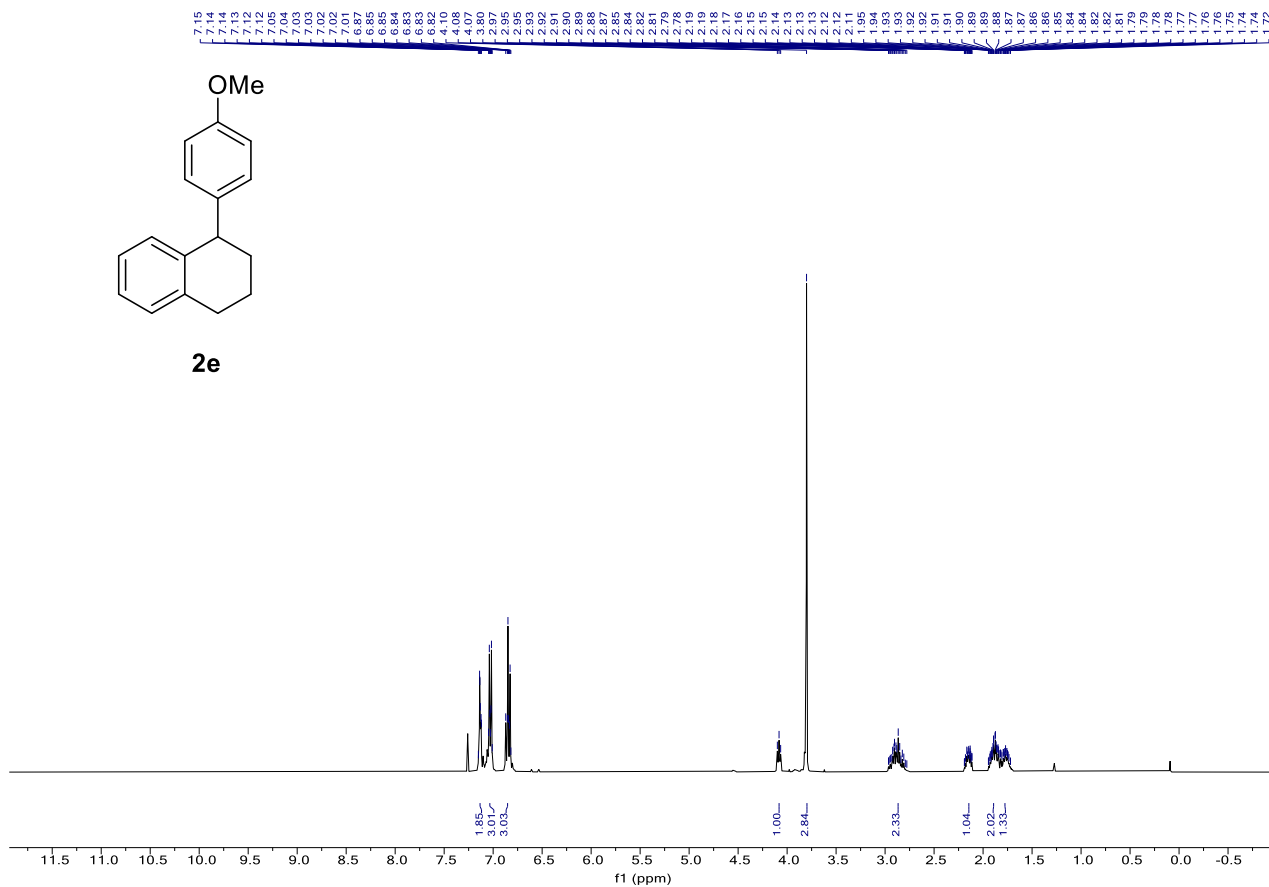

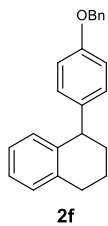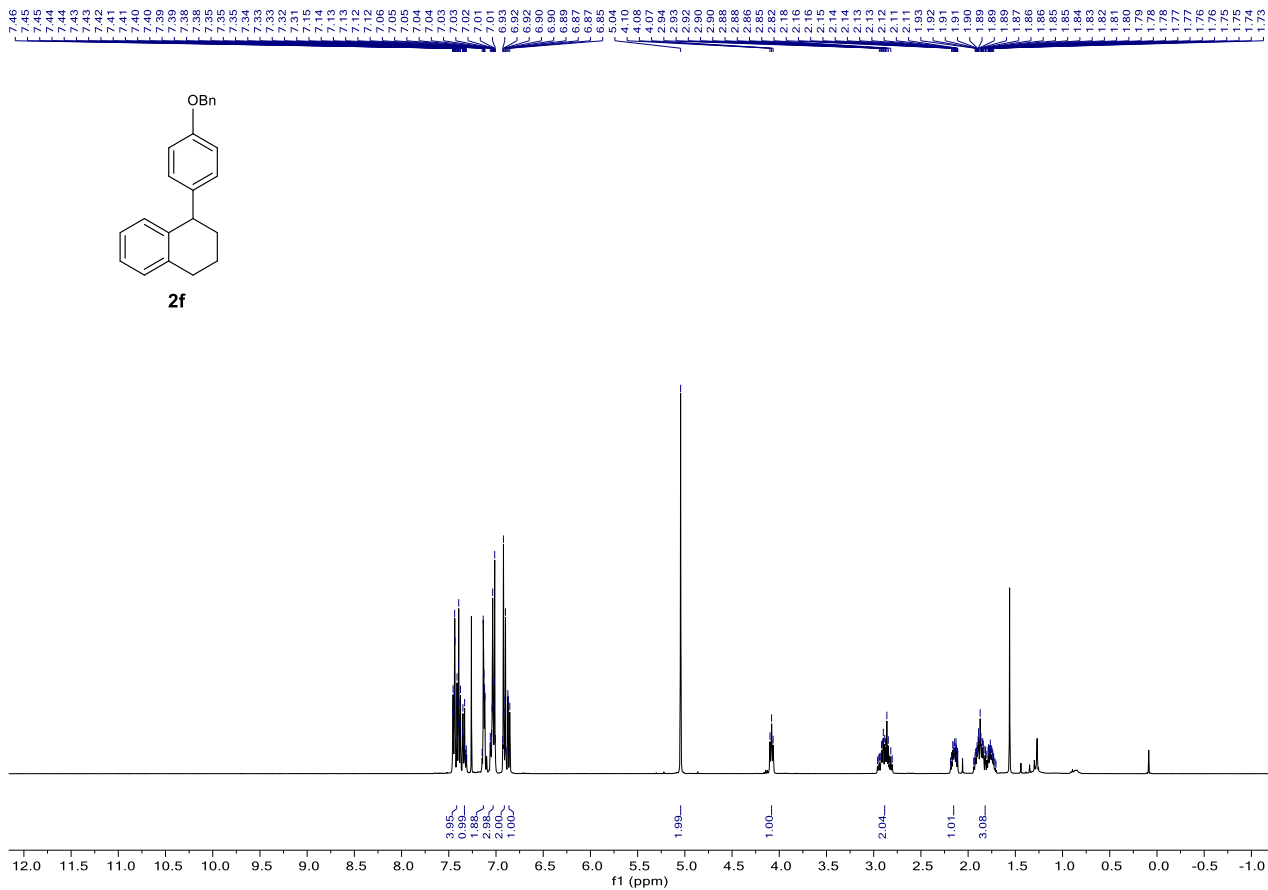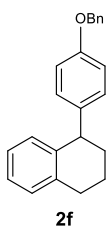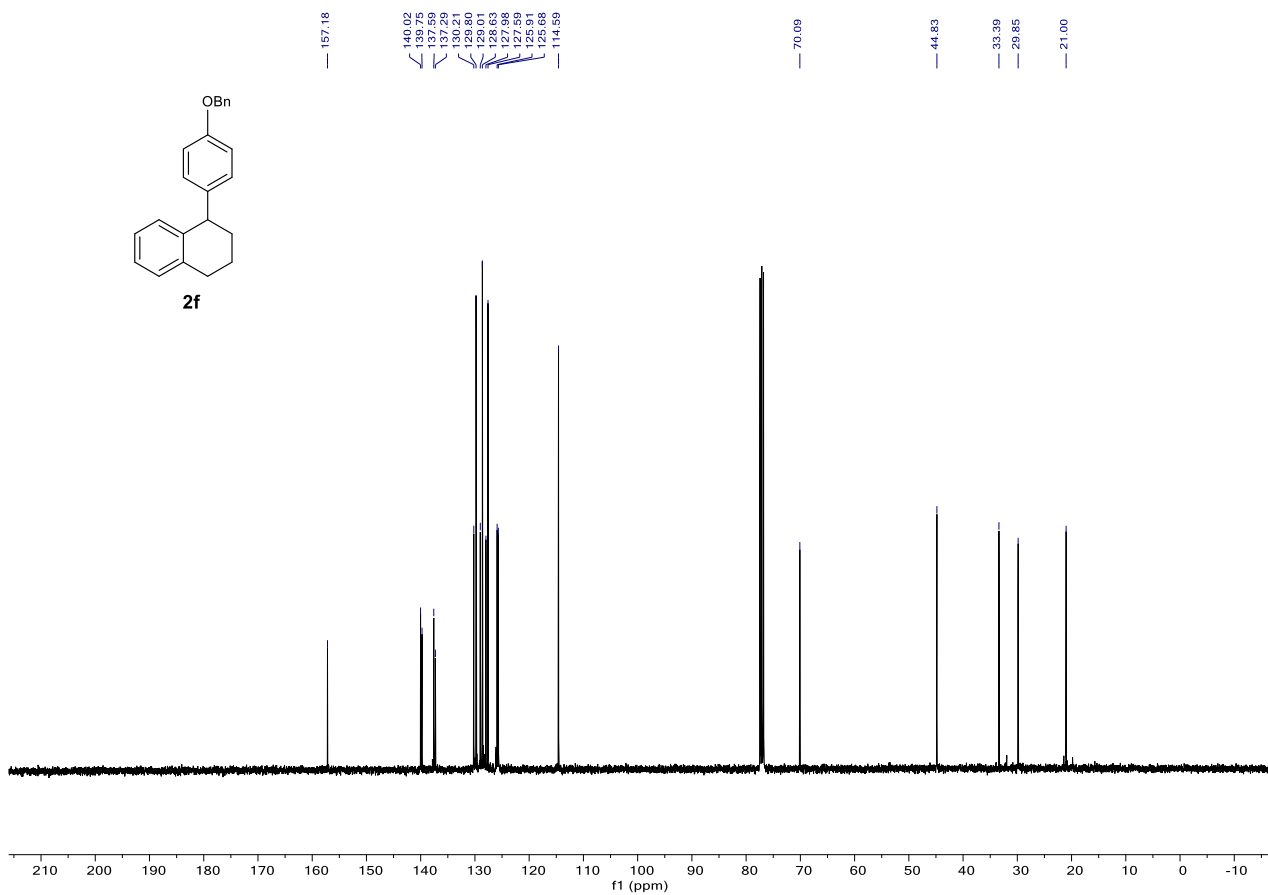

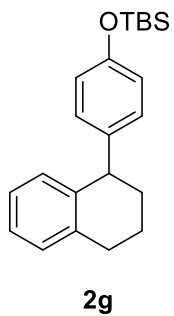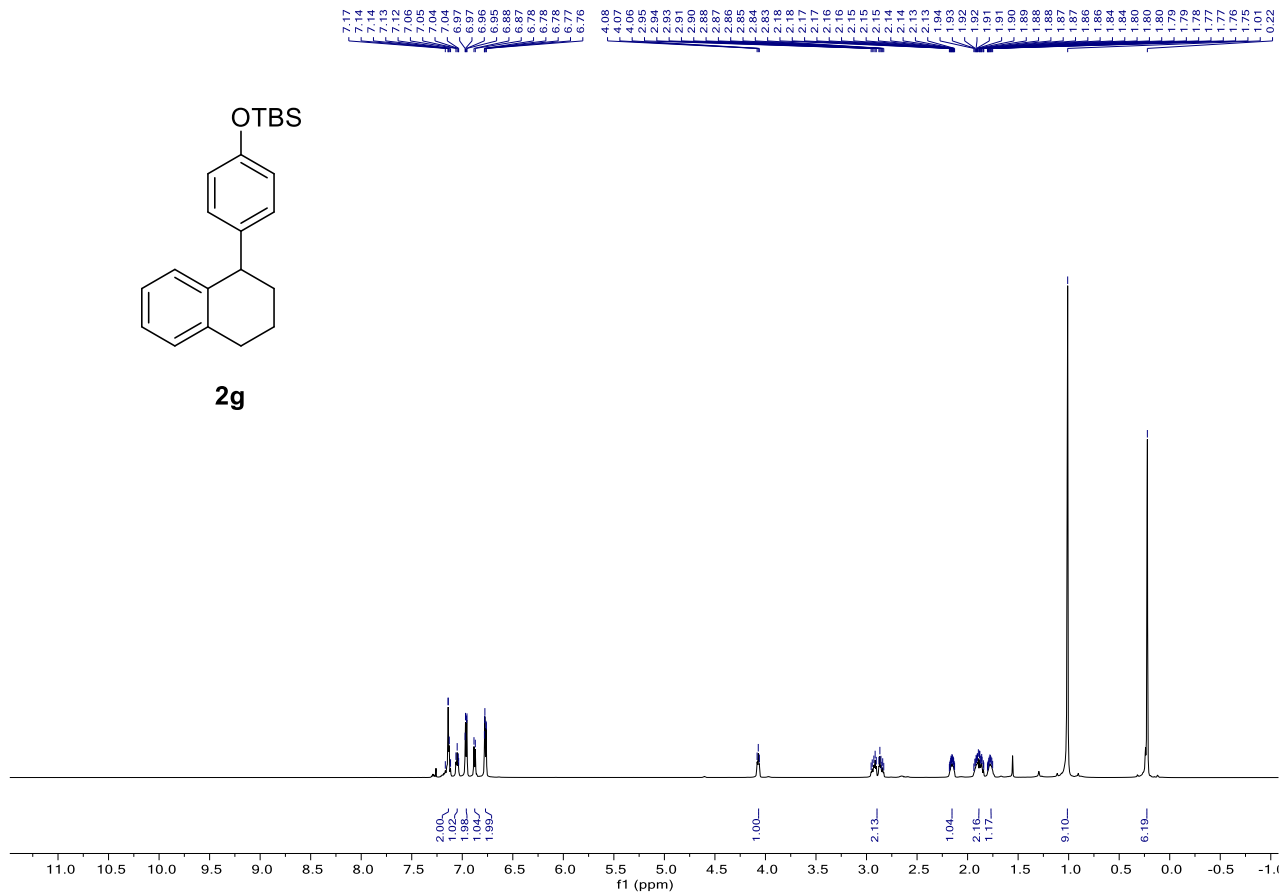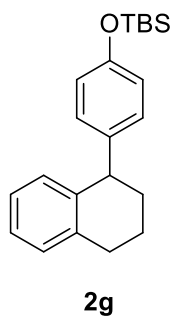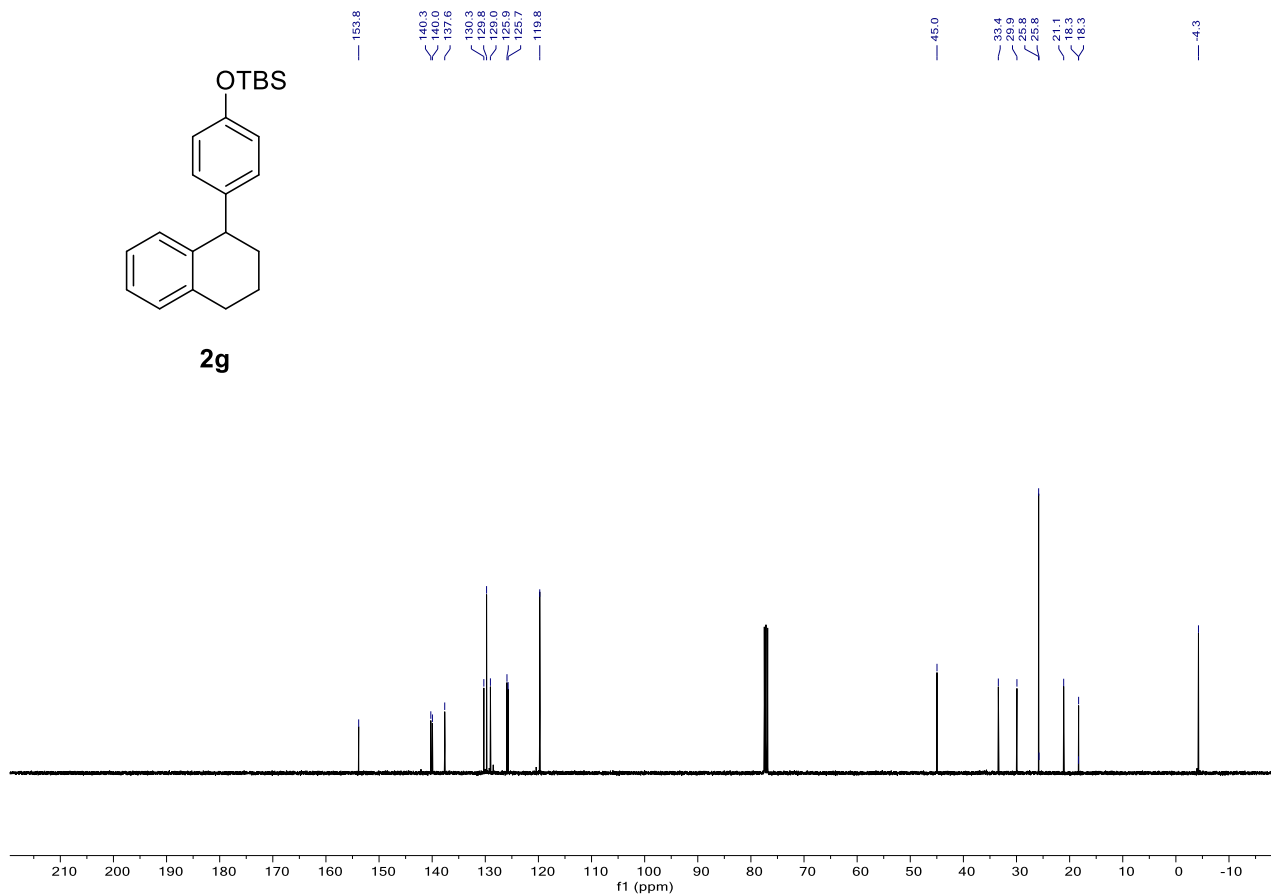



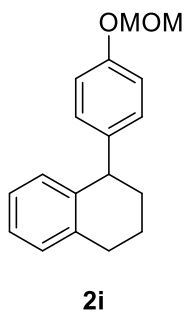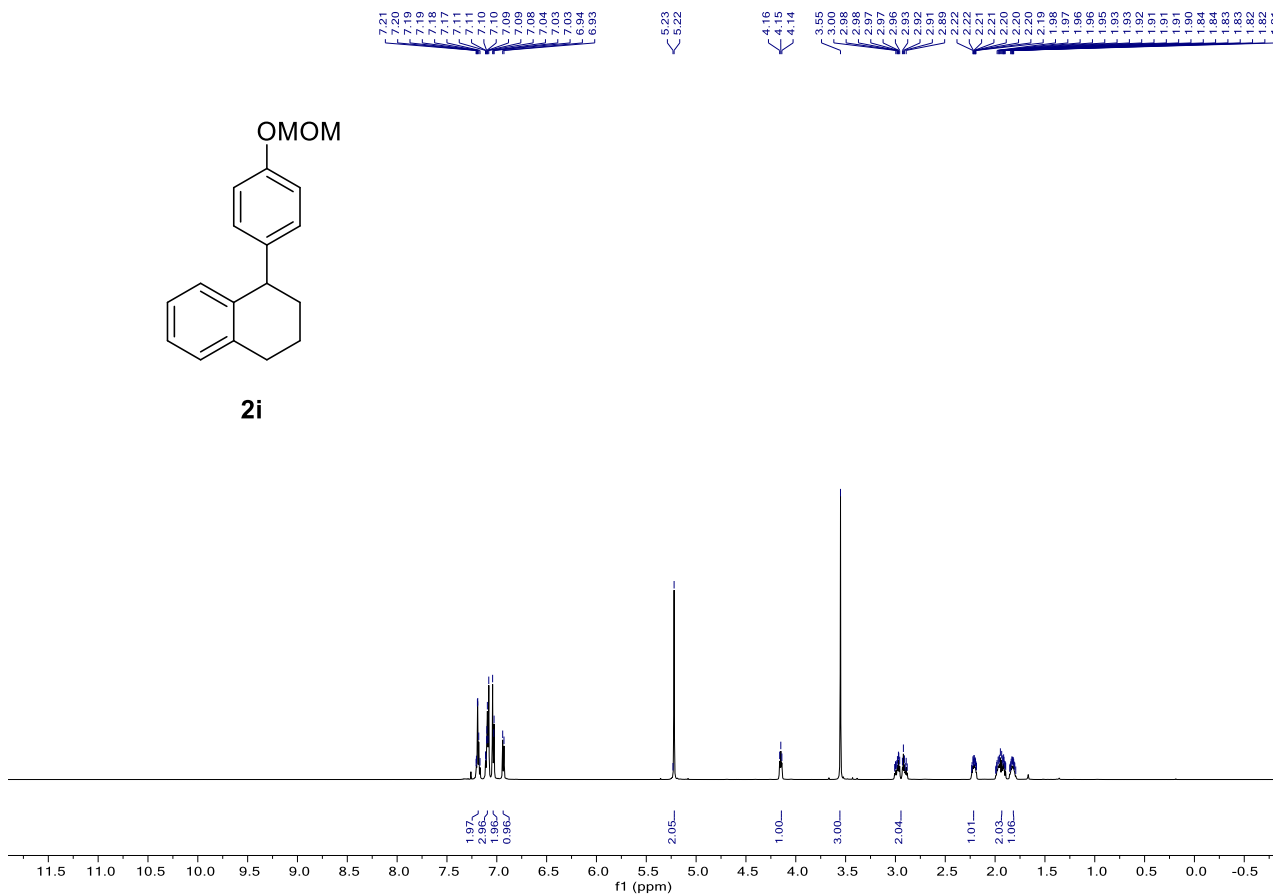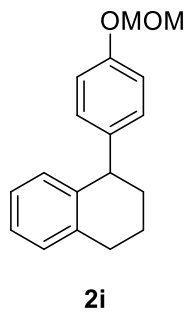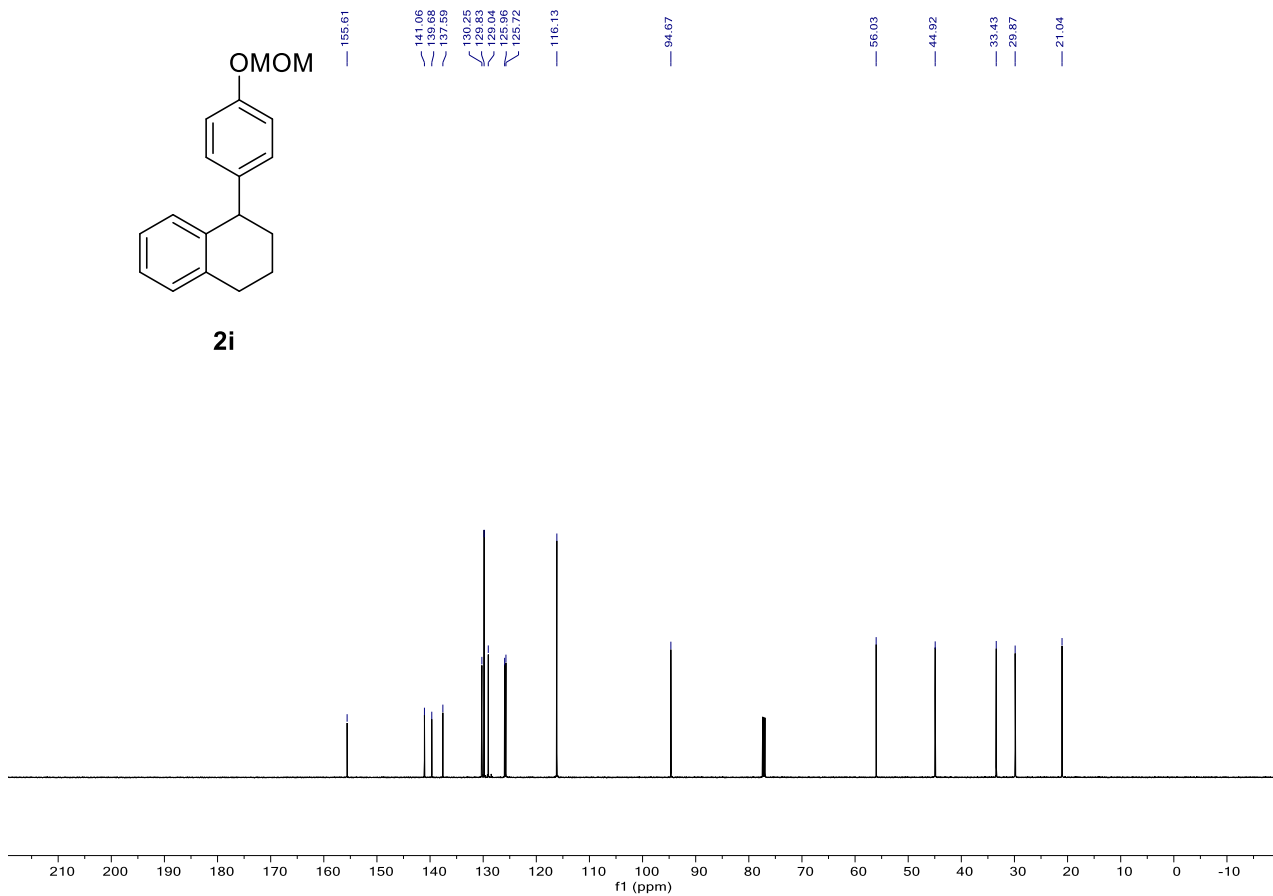

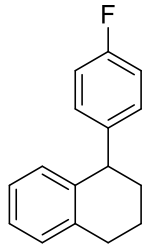

**2k**

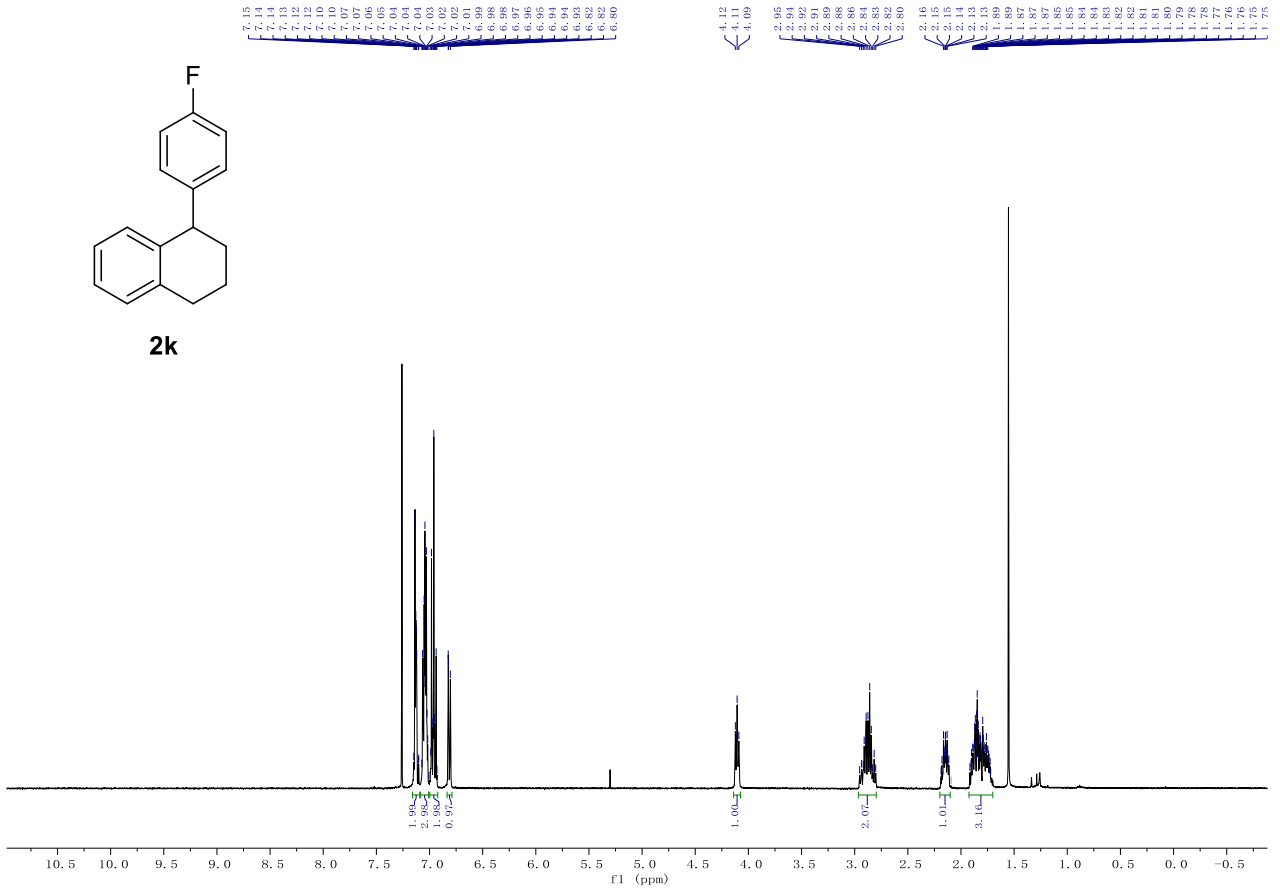

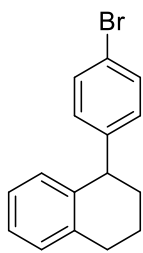

**2I**

7.41  
7.41  
7.40  
7.39  
7.38  
7.26  
7.14  
7.13  
7.13  
7.07  
7.06  
7.05  
7.05  
7.04  
7.03  
7.02  
6.99  
6.98  
6.98  
6.97  
6.96  
6.82  
6.80

4.10  
4.09  
4.07  
2.94  
2.94  
2.91  
2.90  
2.89  
2.88  
2.85  
2.83  
2.82  
2.80  
2.17  
2.15  
2.14  
2.14  
2.13  
1.90  
1.89  
1.87  
1.87  
1.86  
1.85  
1.84  
1.83  
1.82  
1.81  
1.80  
1.79  
1.78  
1.78  
1.77  
1.76  
1.76

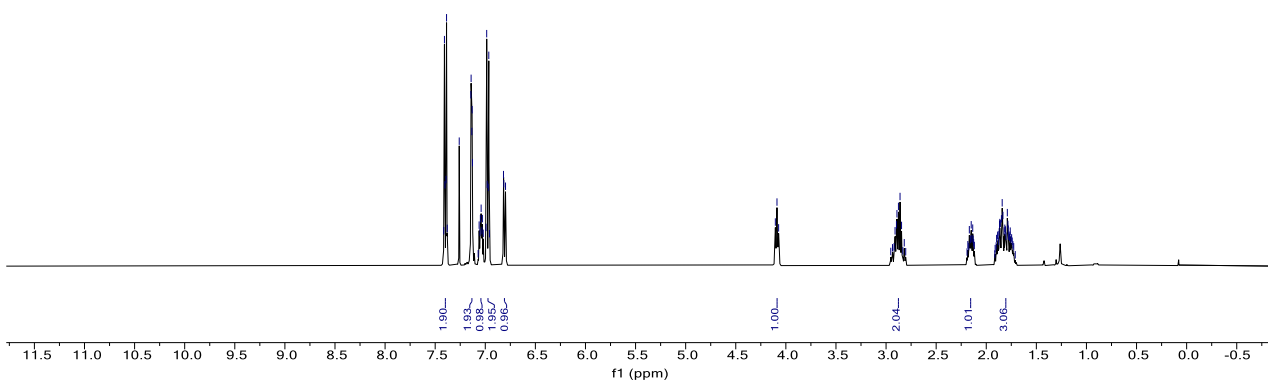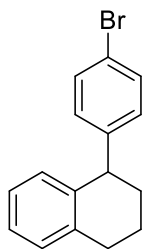

**2I**

146.67  
138.80  
137.66  
131.43  
130.68  
129.20  
126.26  
125.88  
119.86

45.20  
33.30  
29.81  
20.94

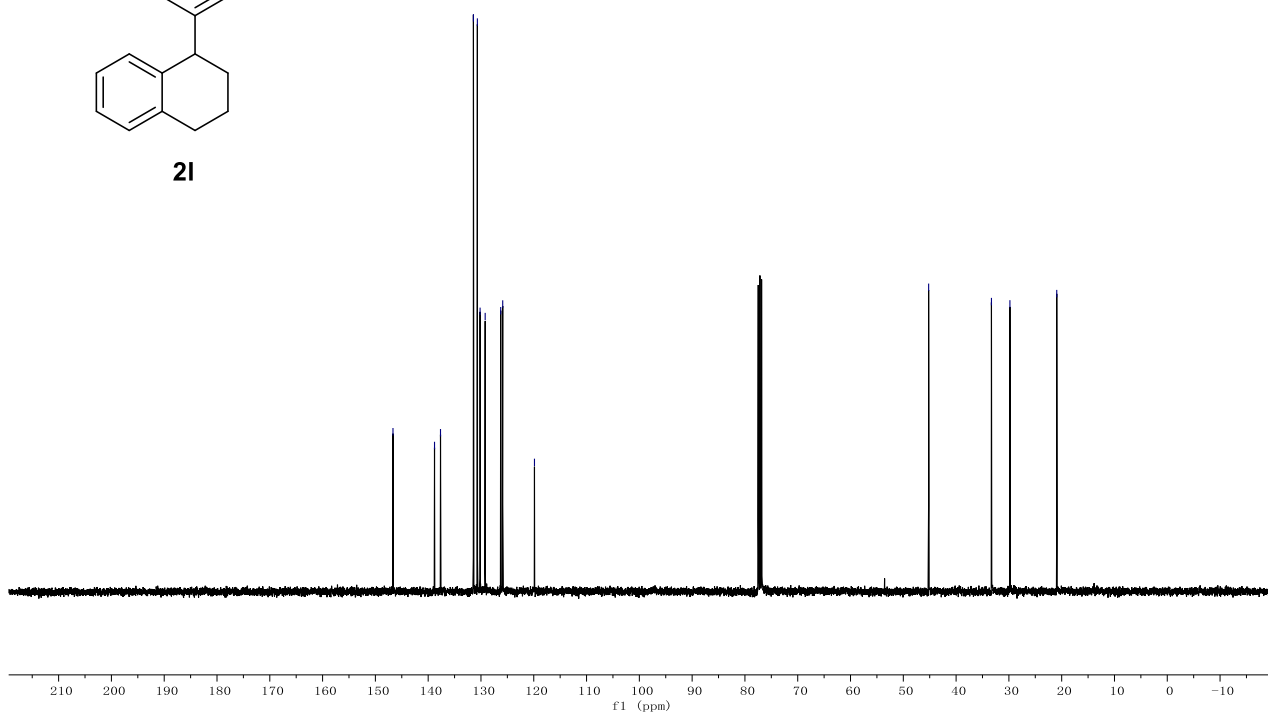





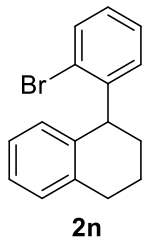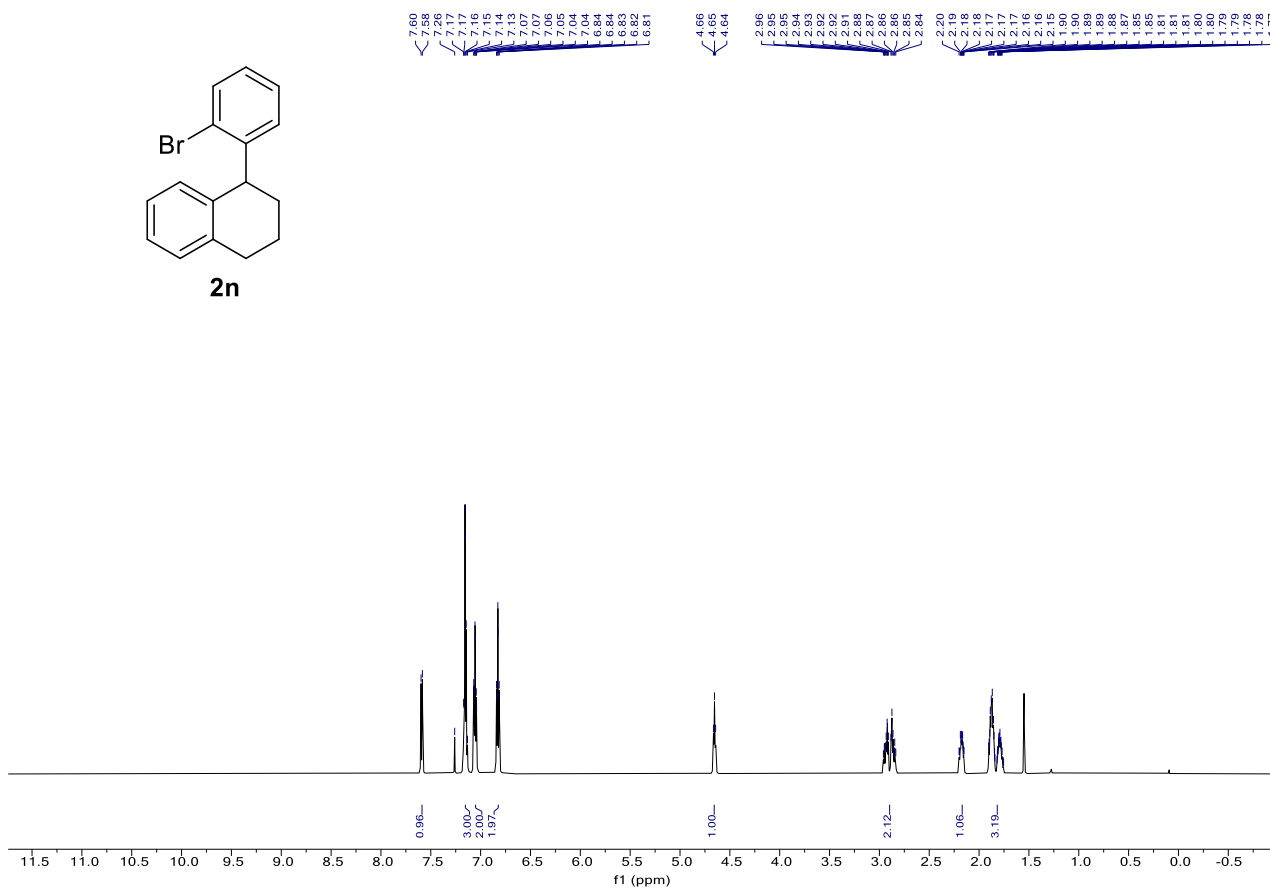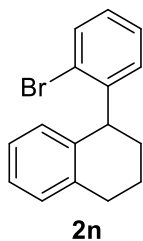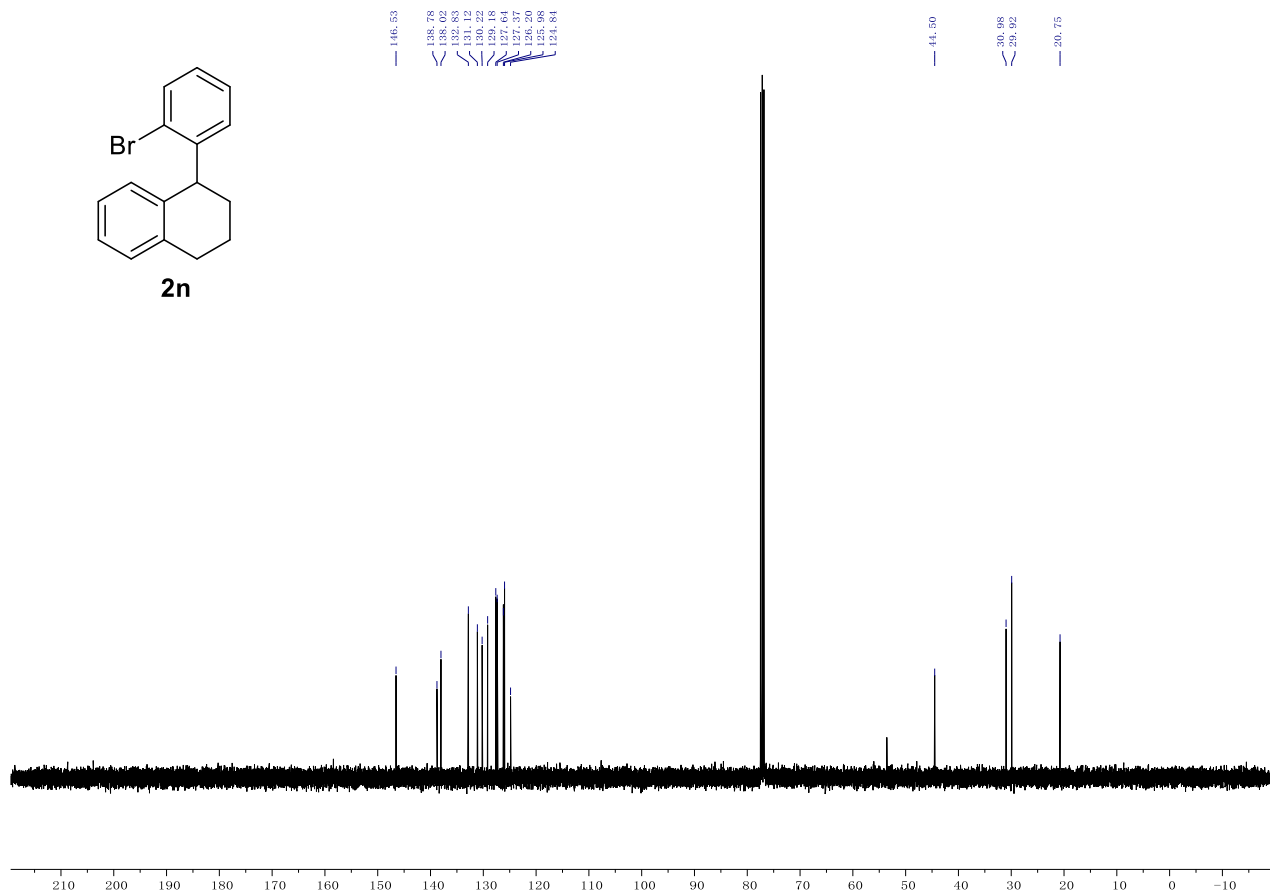

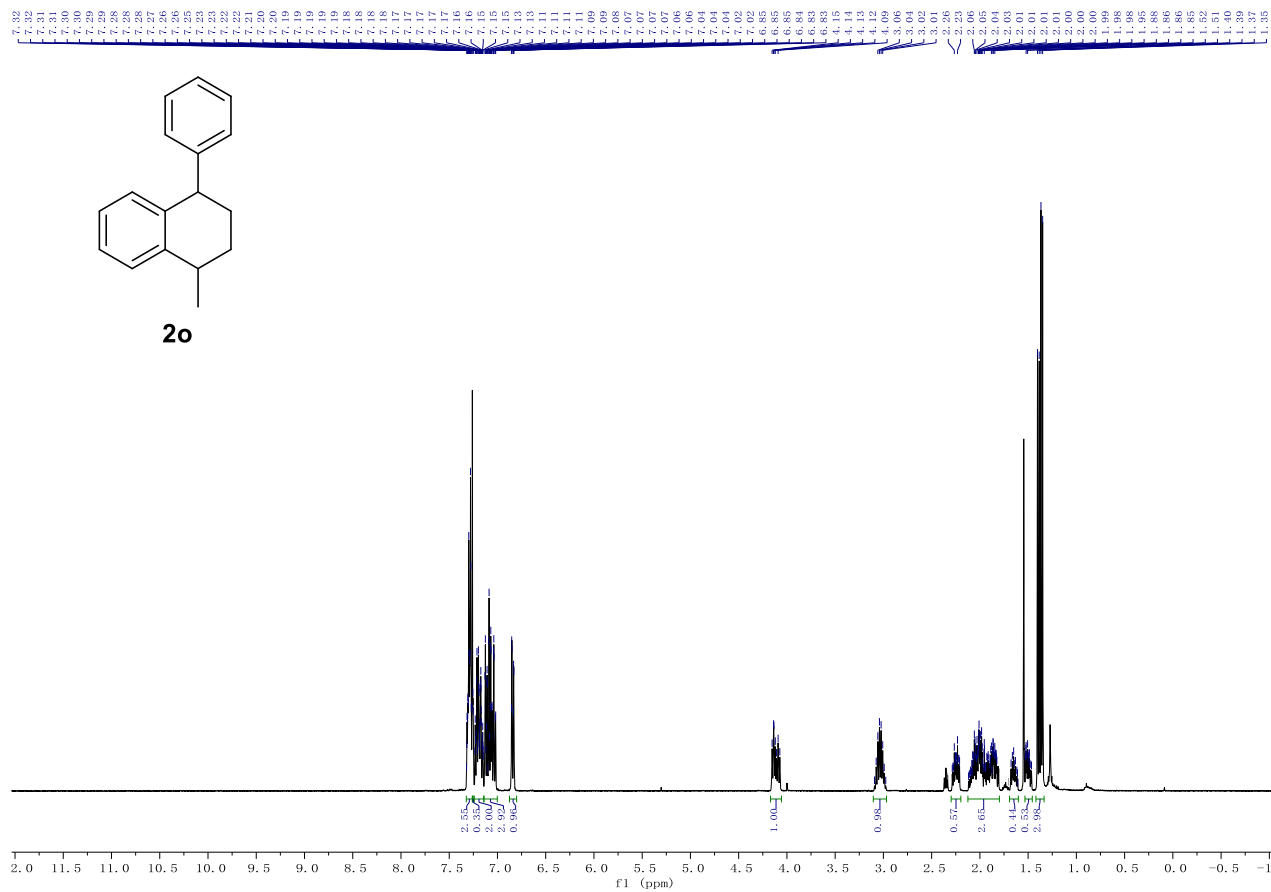

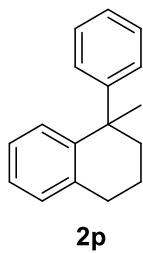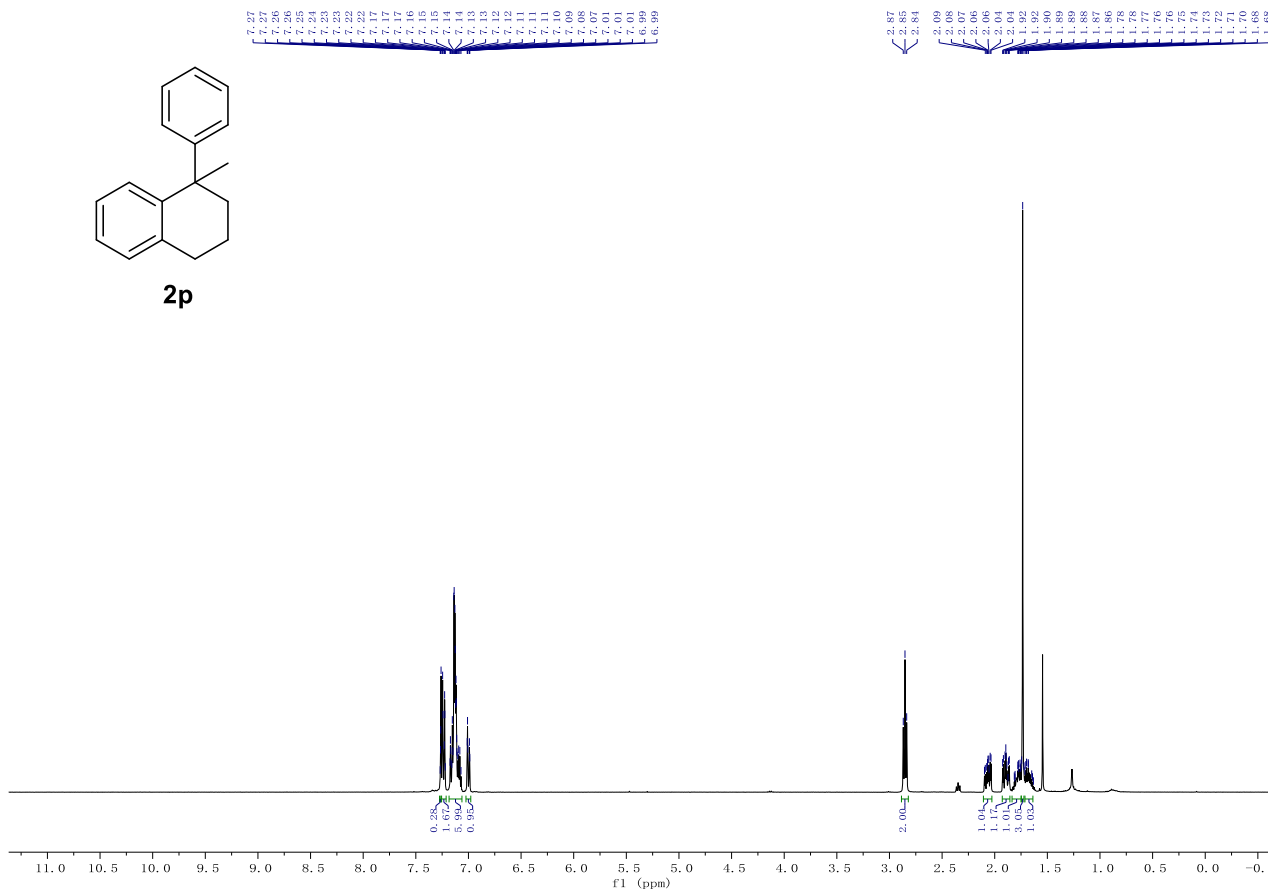

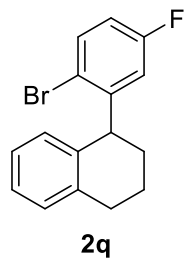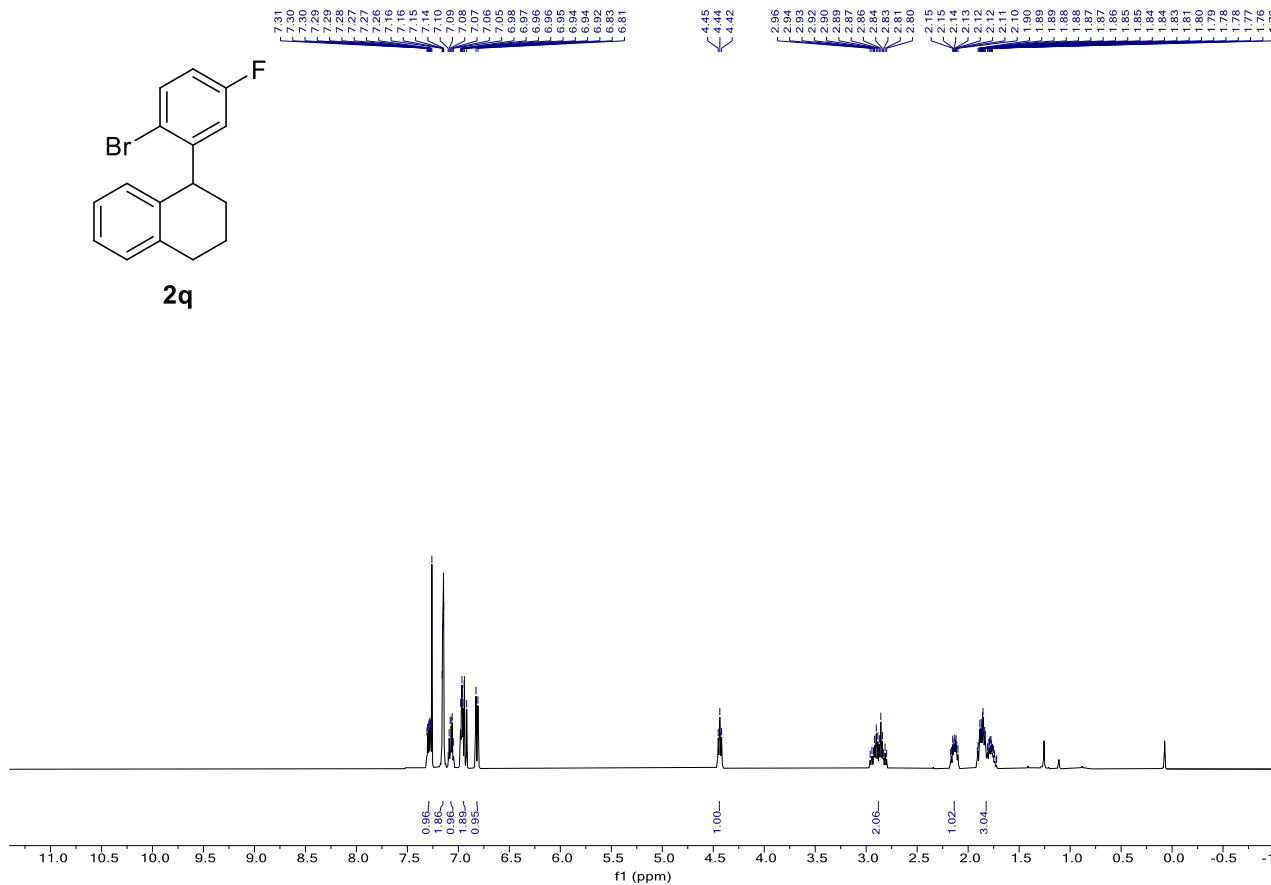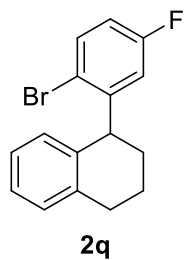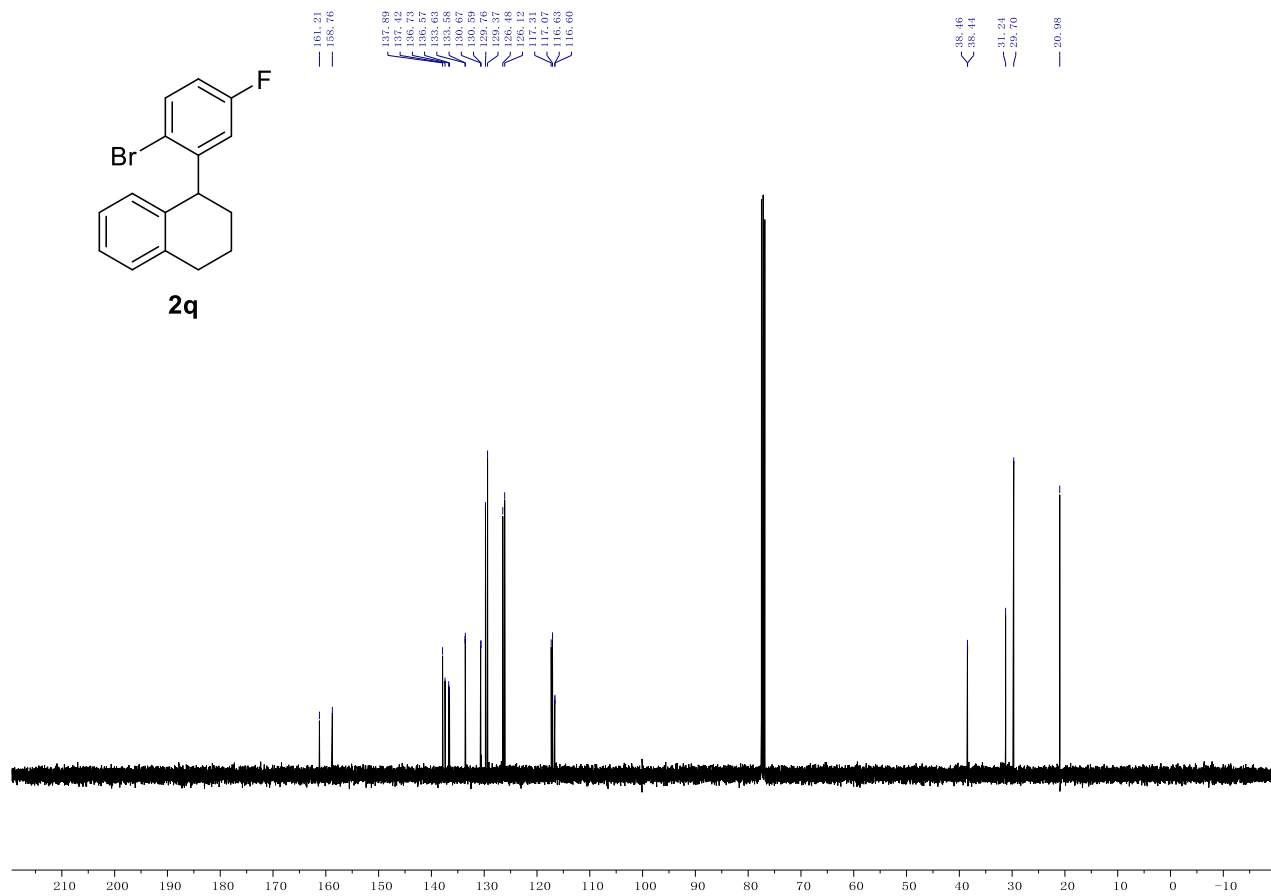



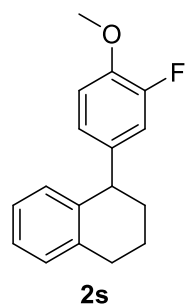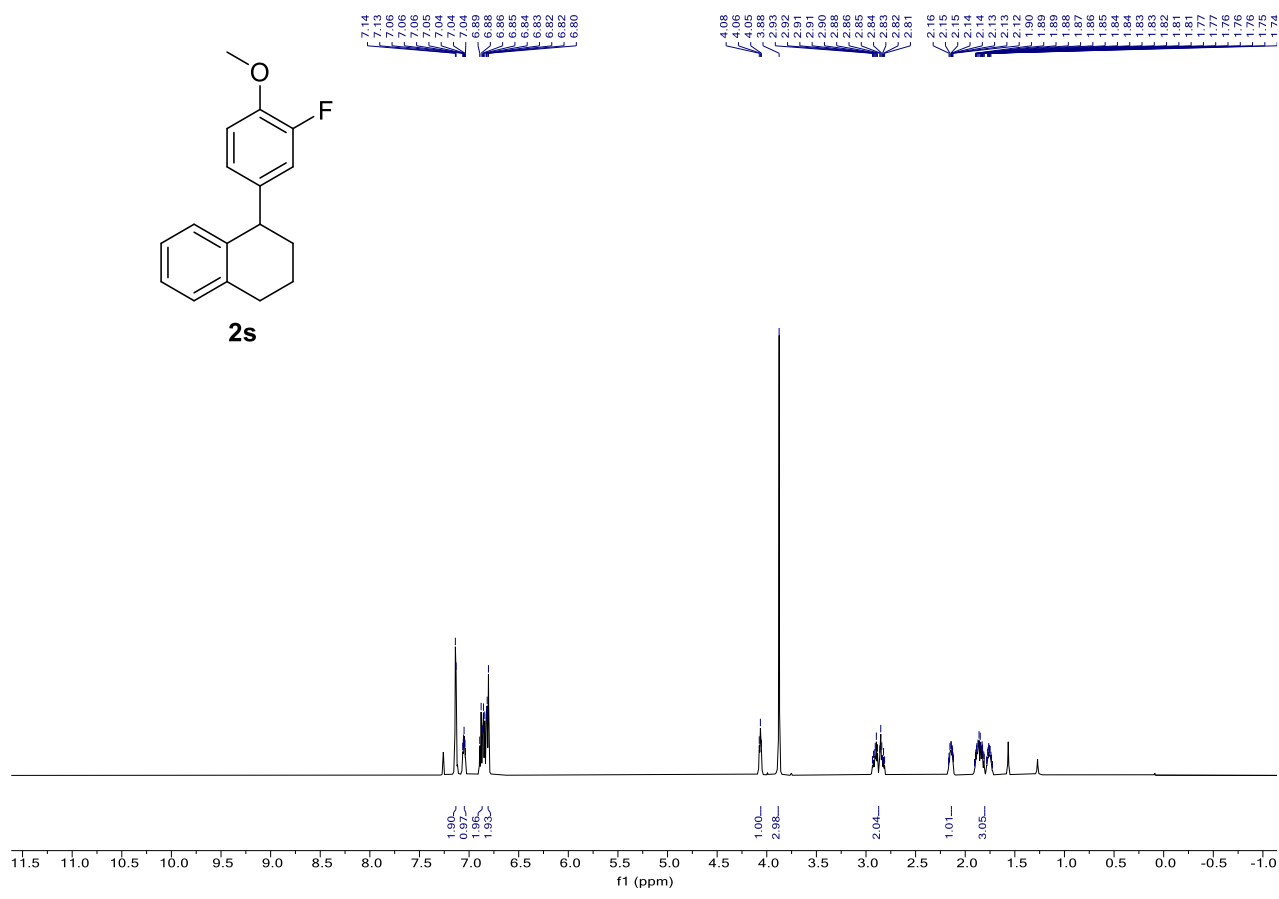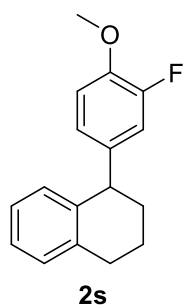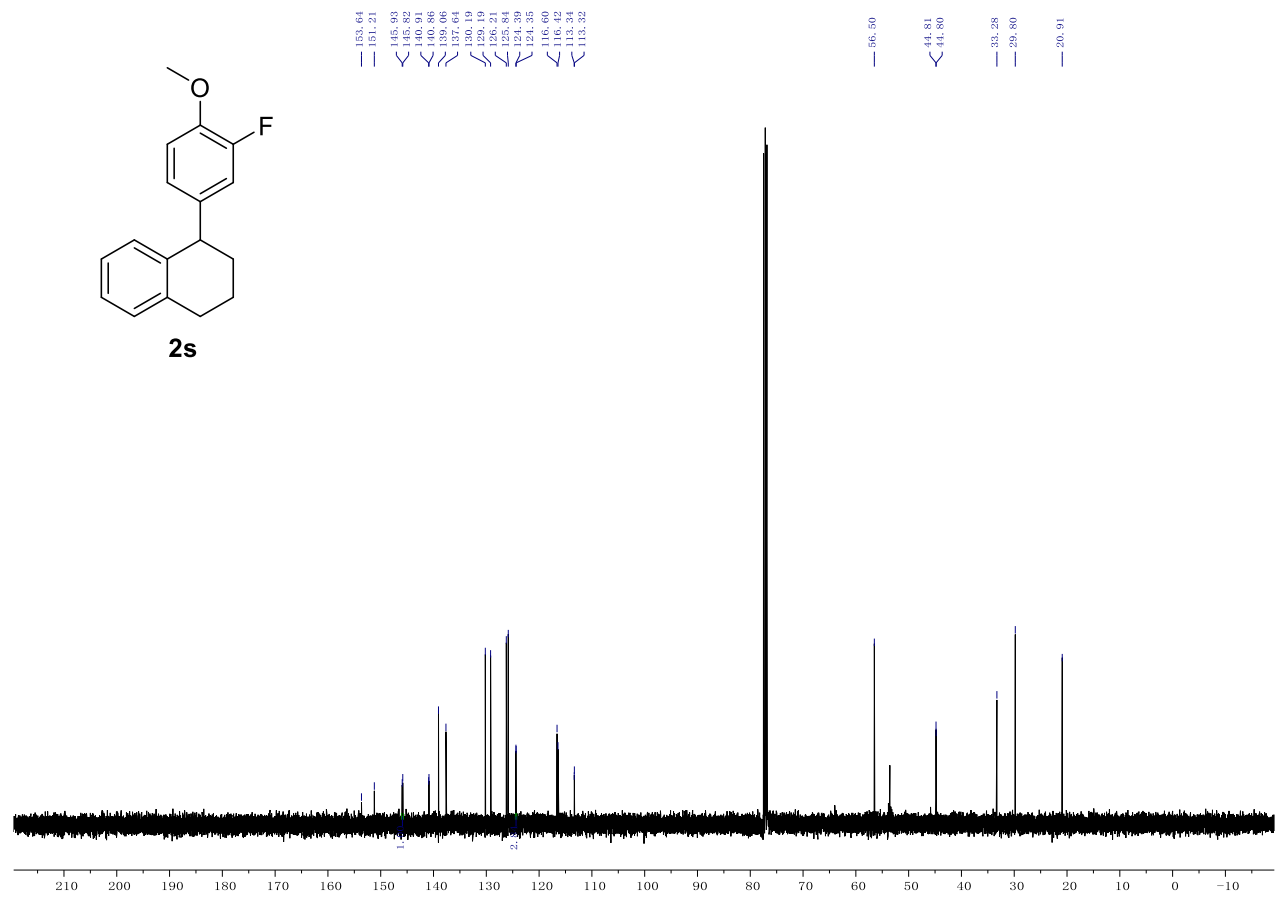

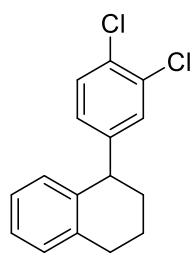

2t

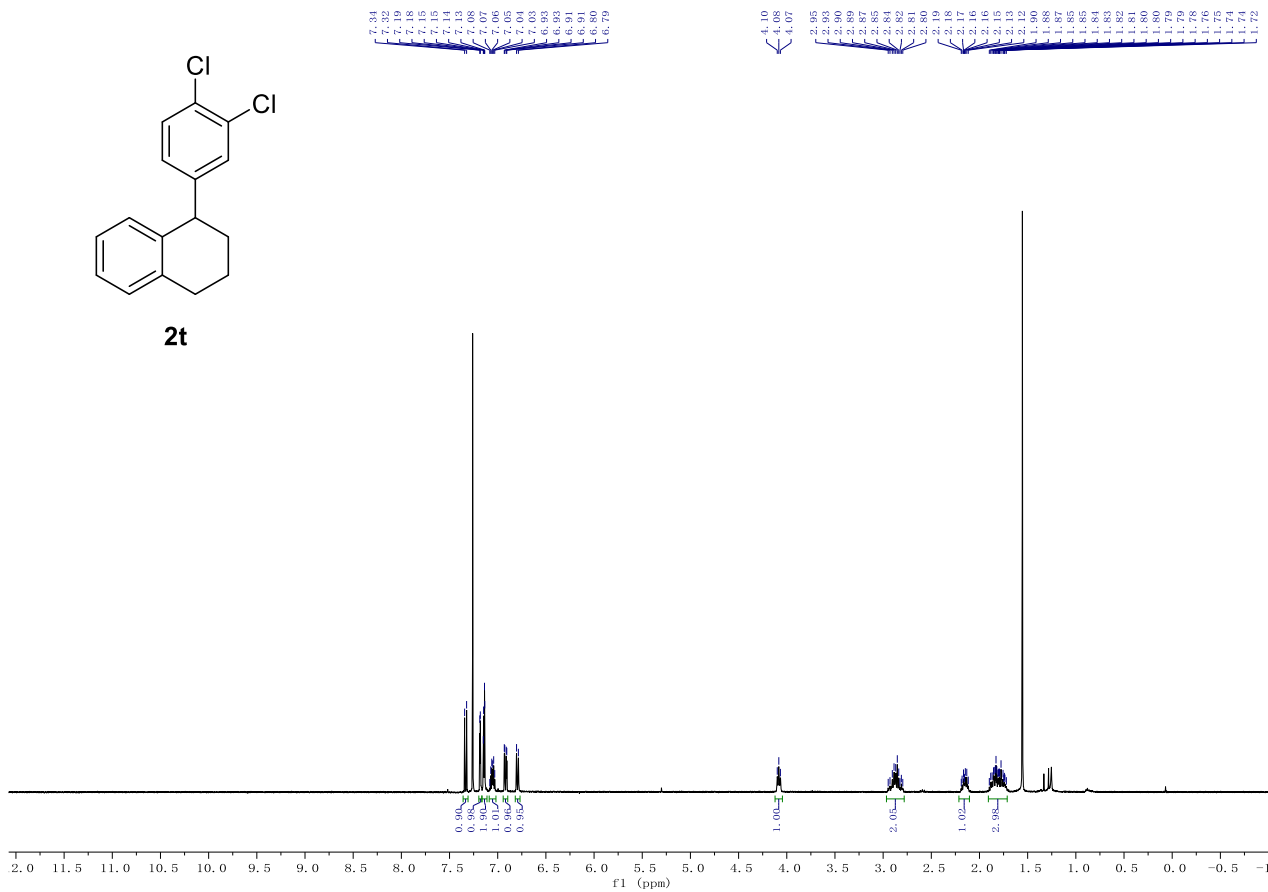



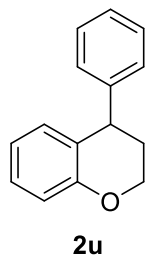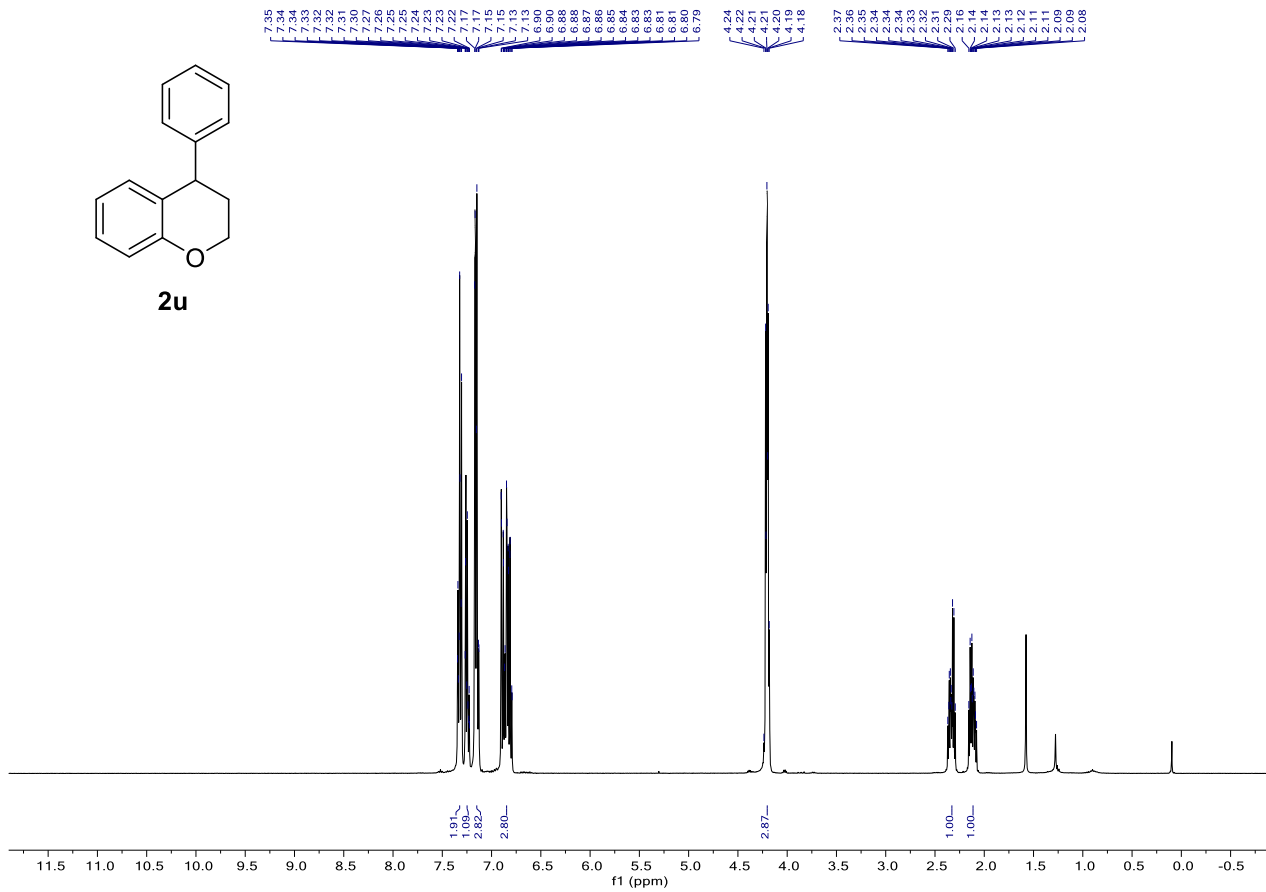

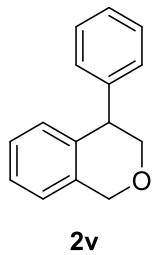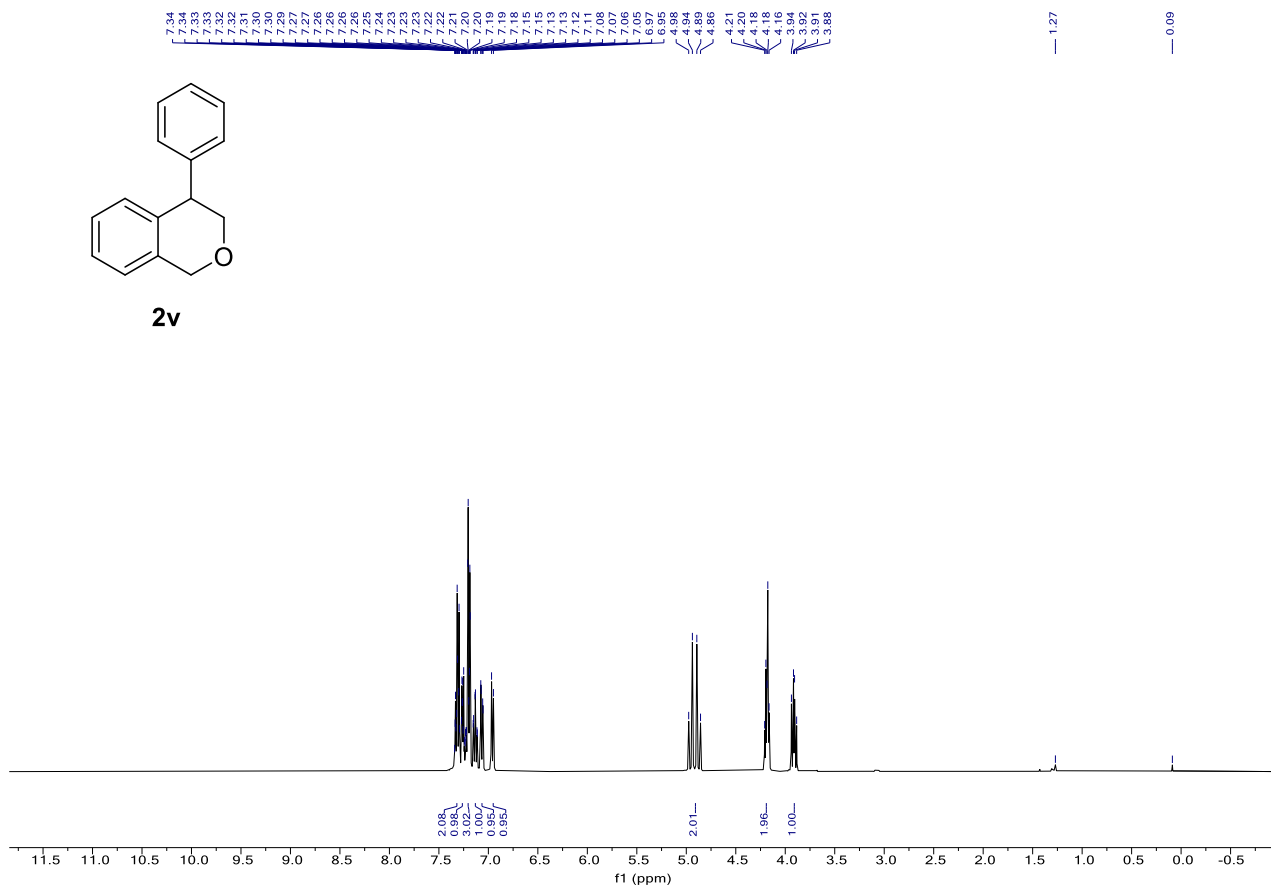

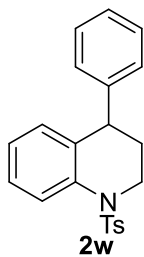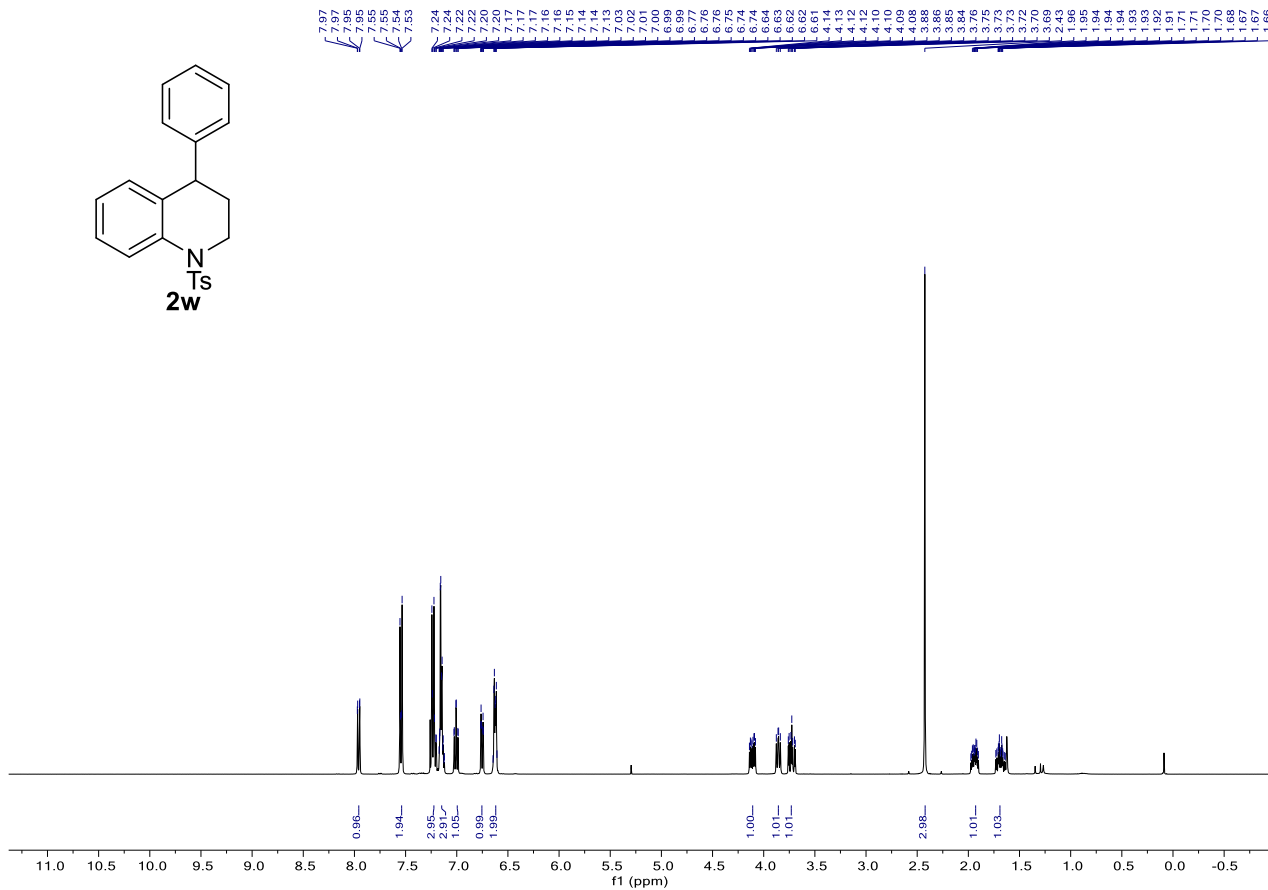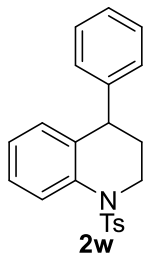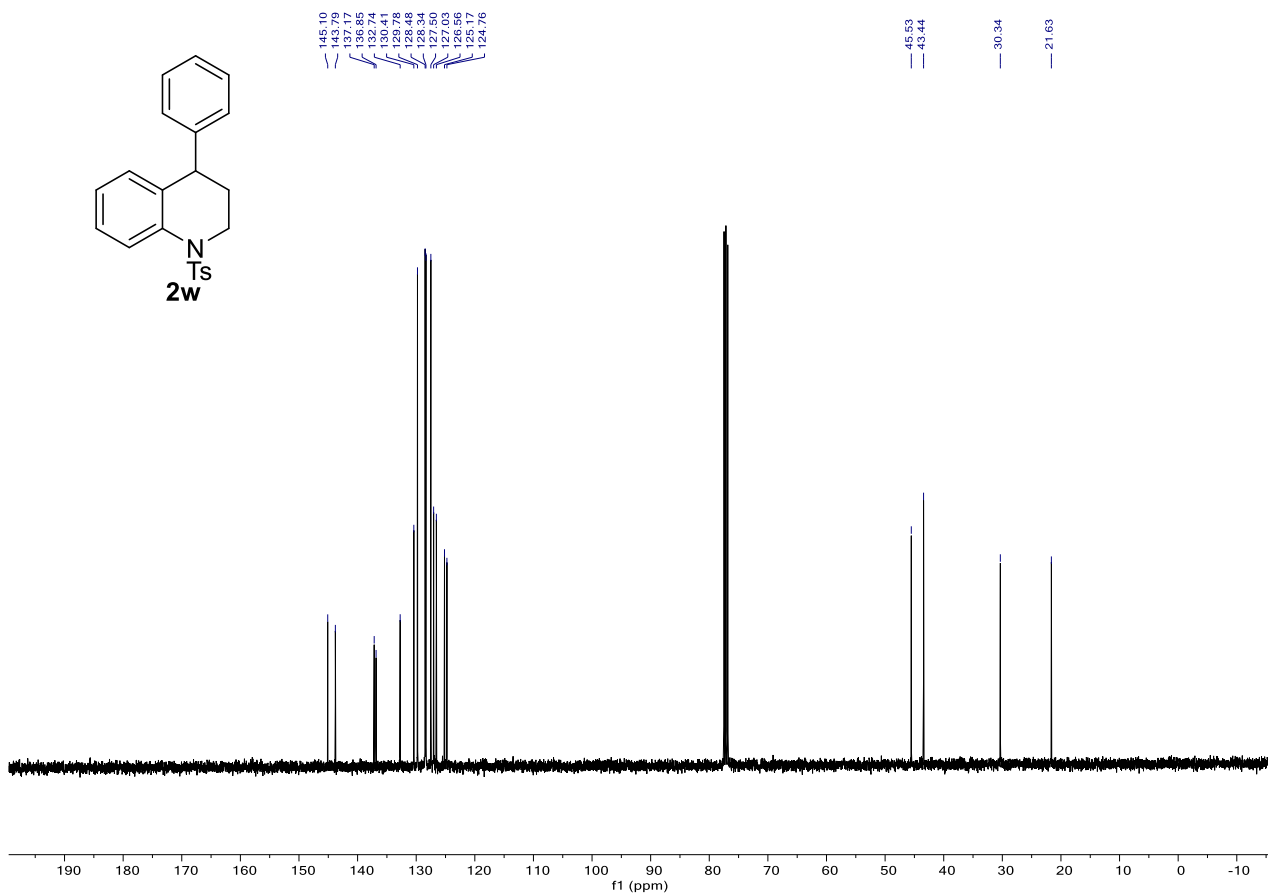

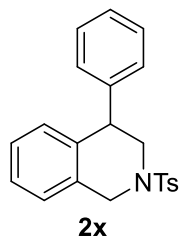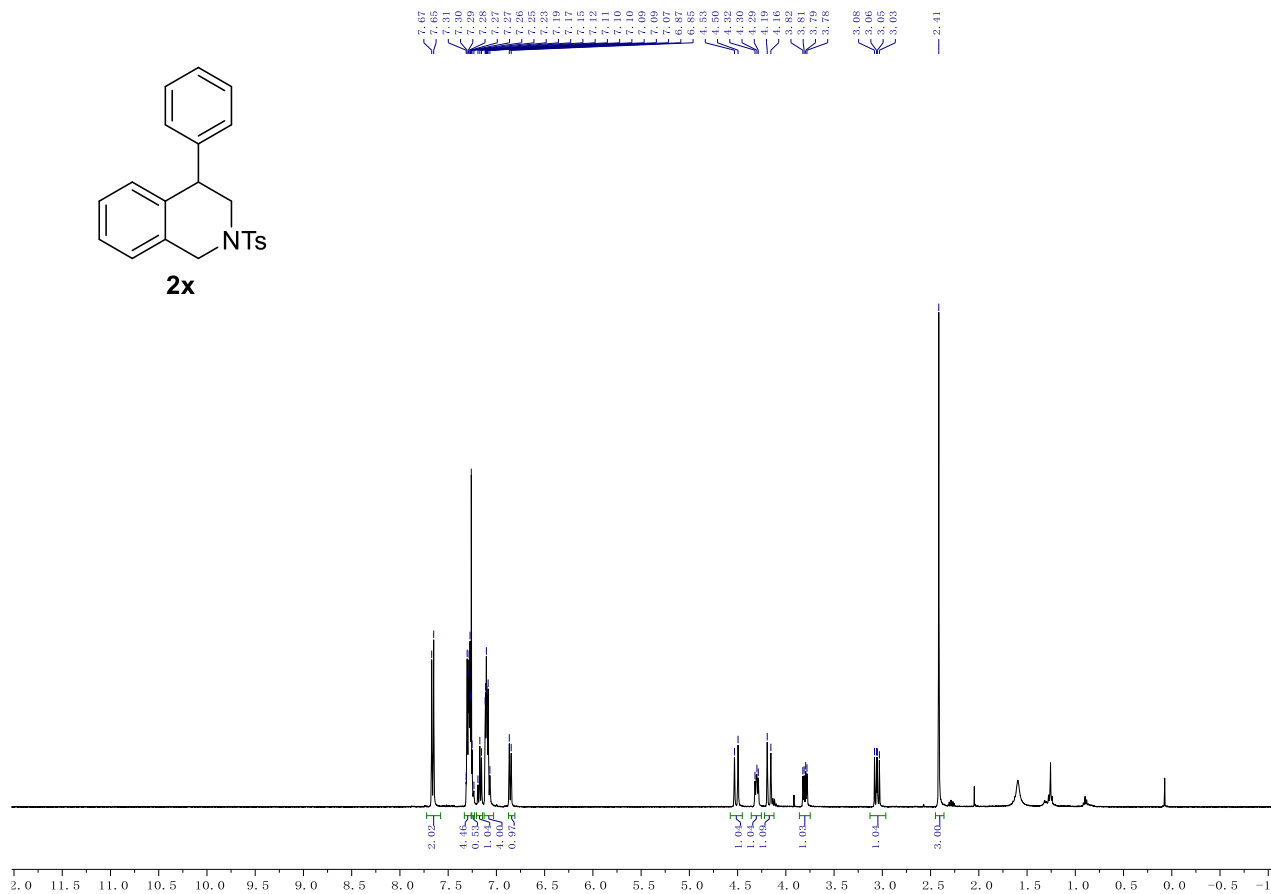

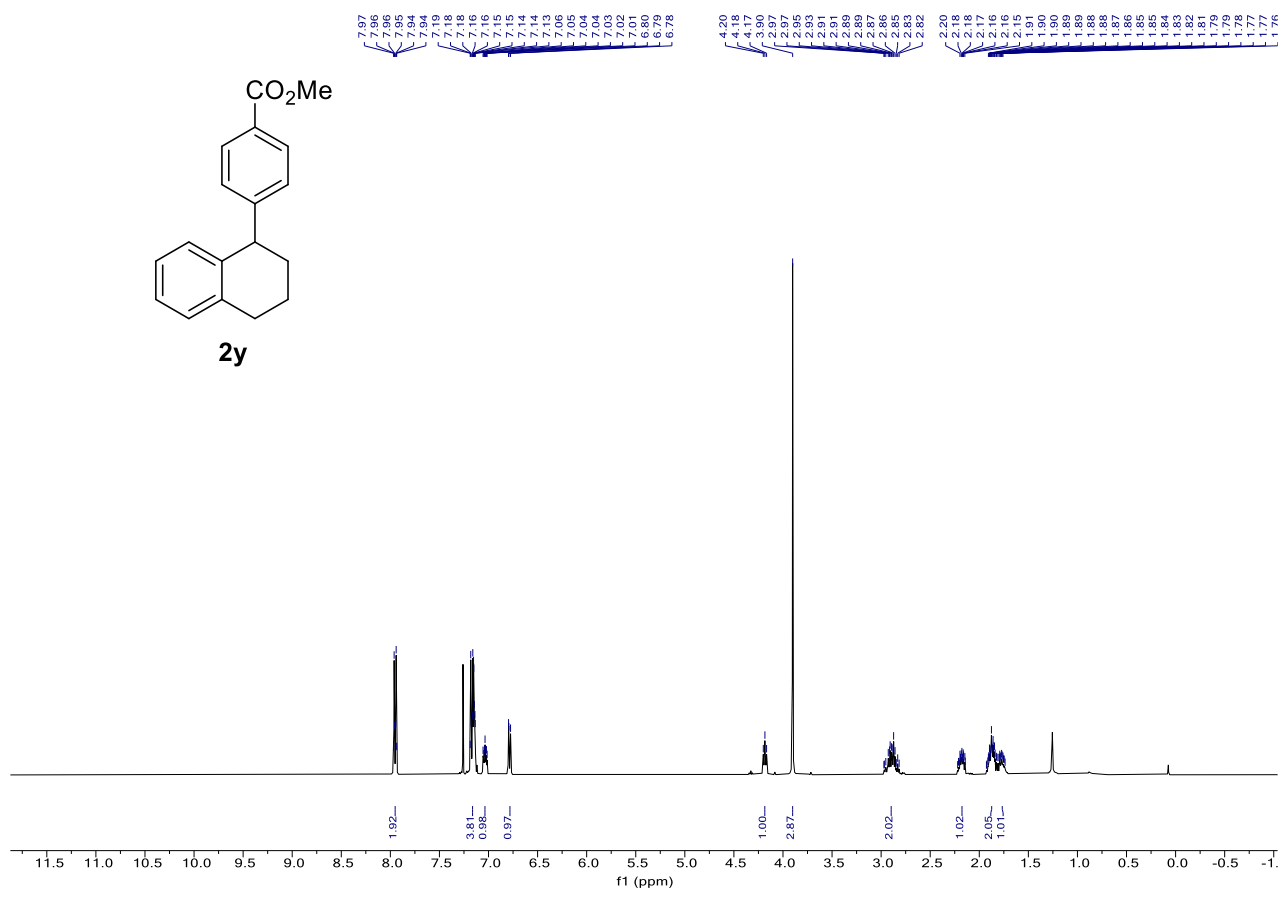

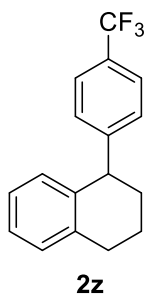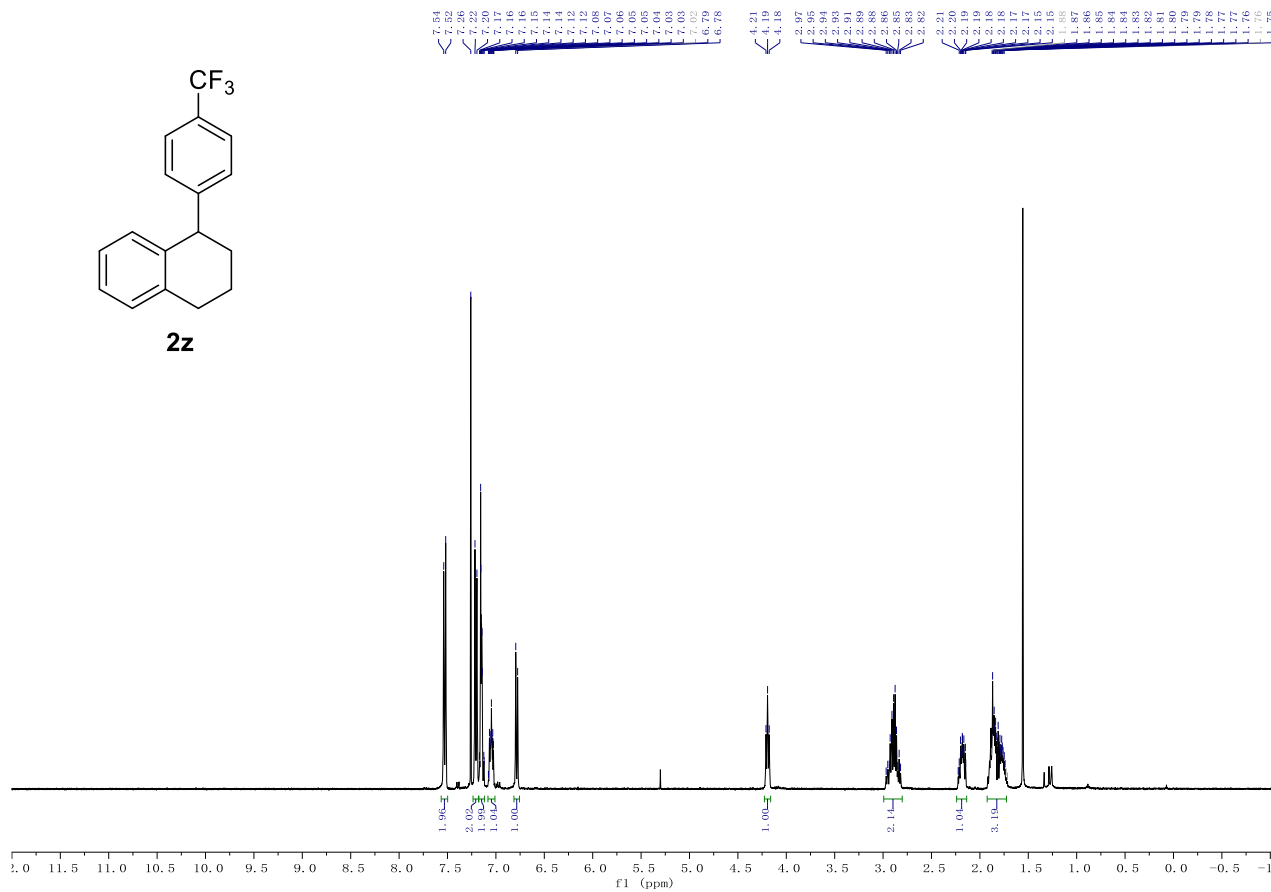

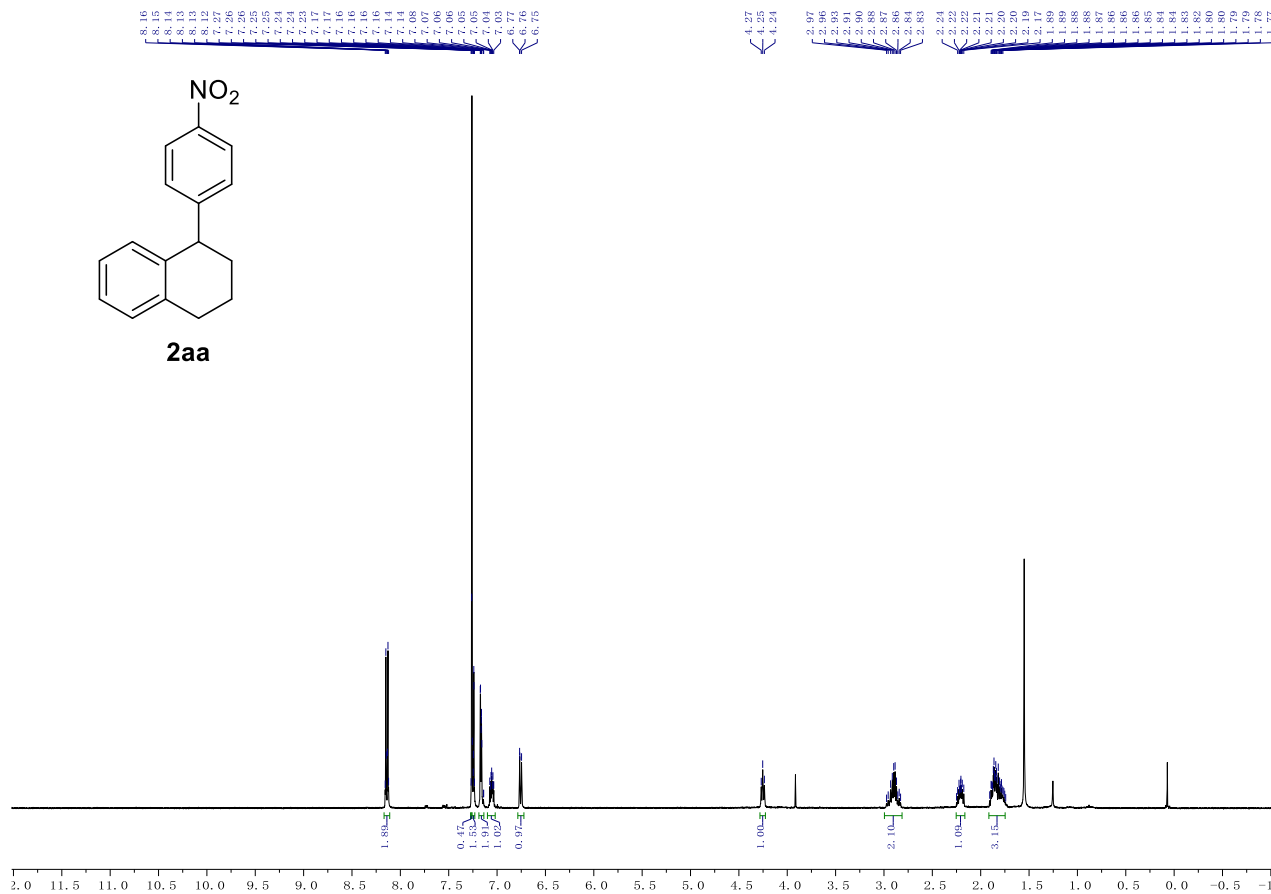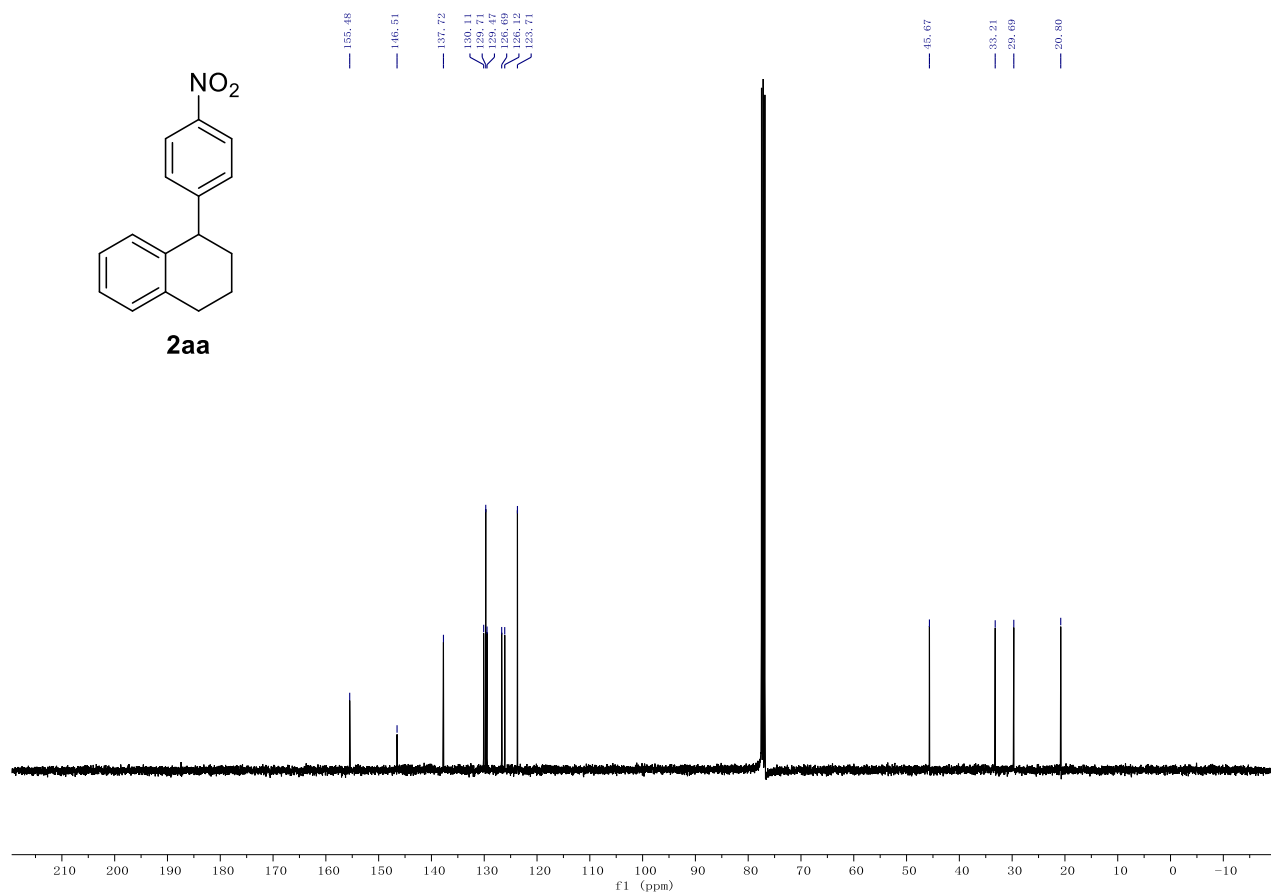

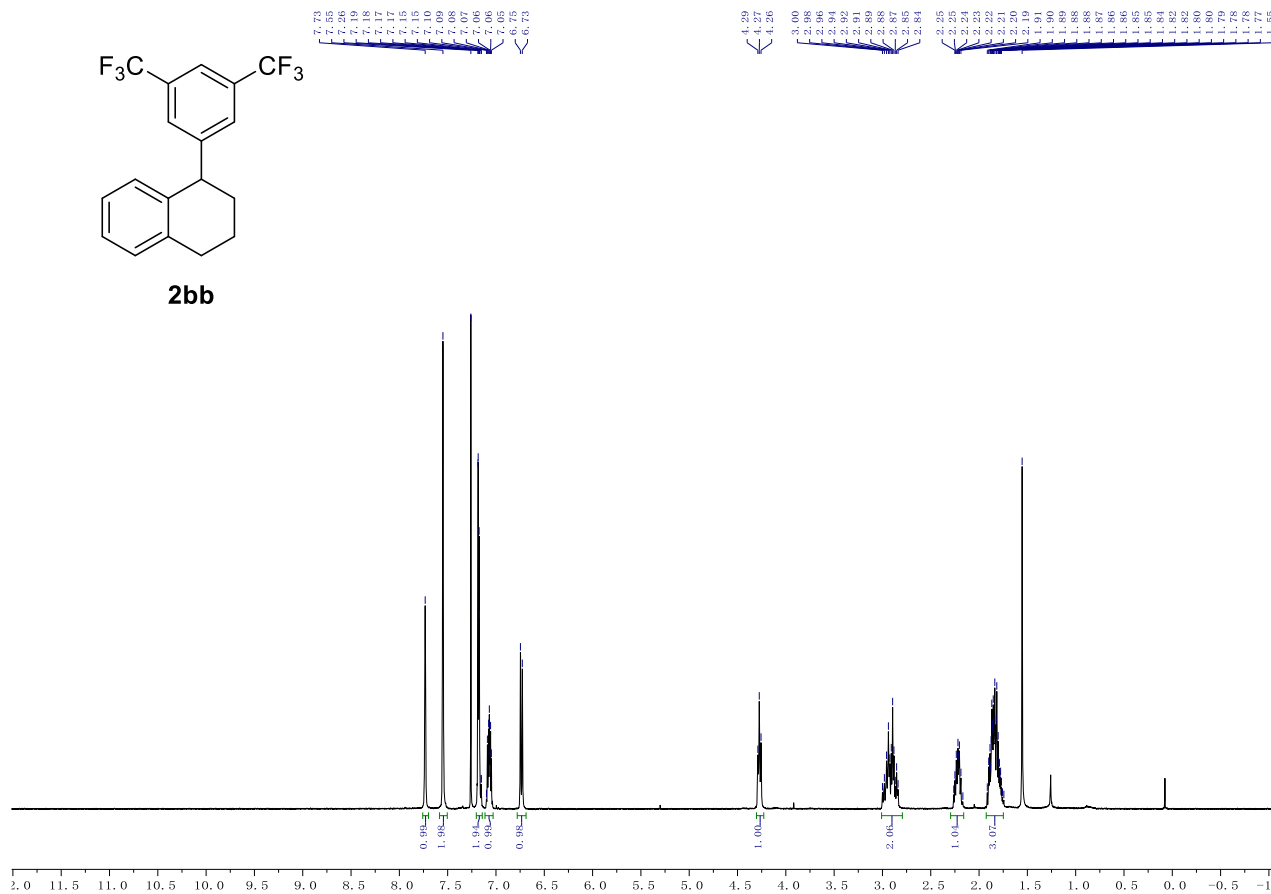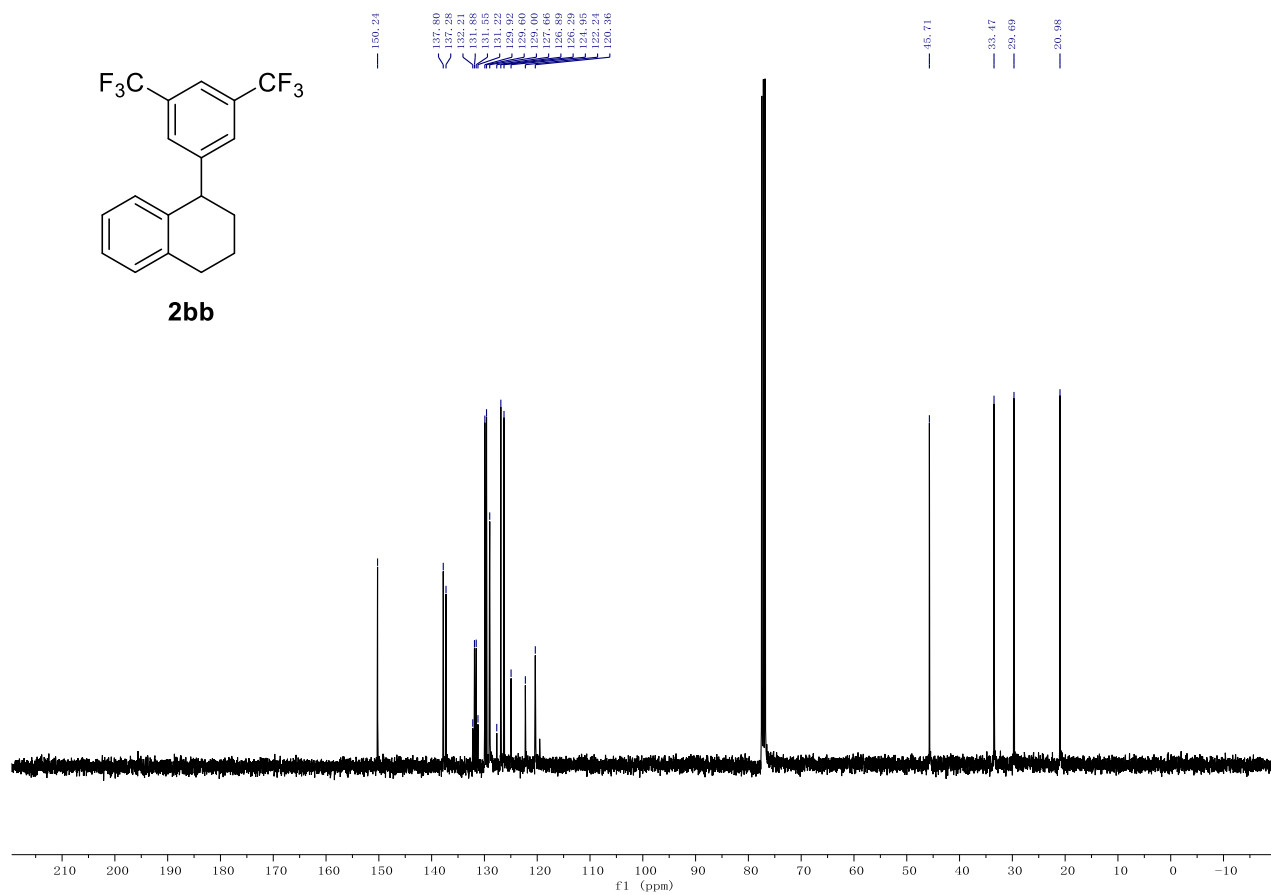



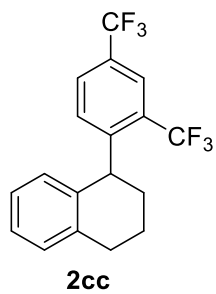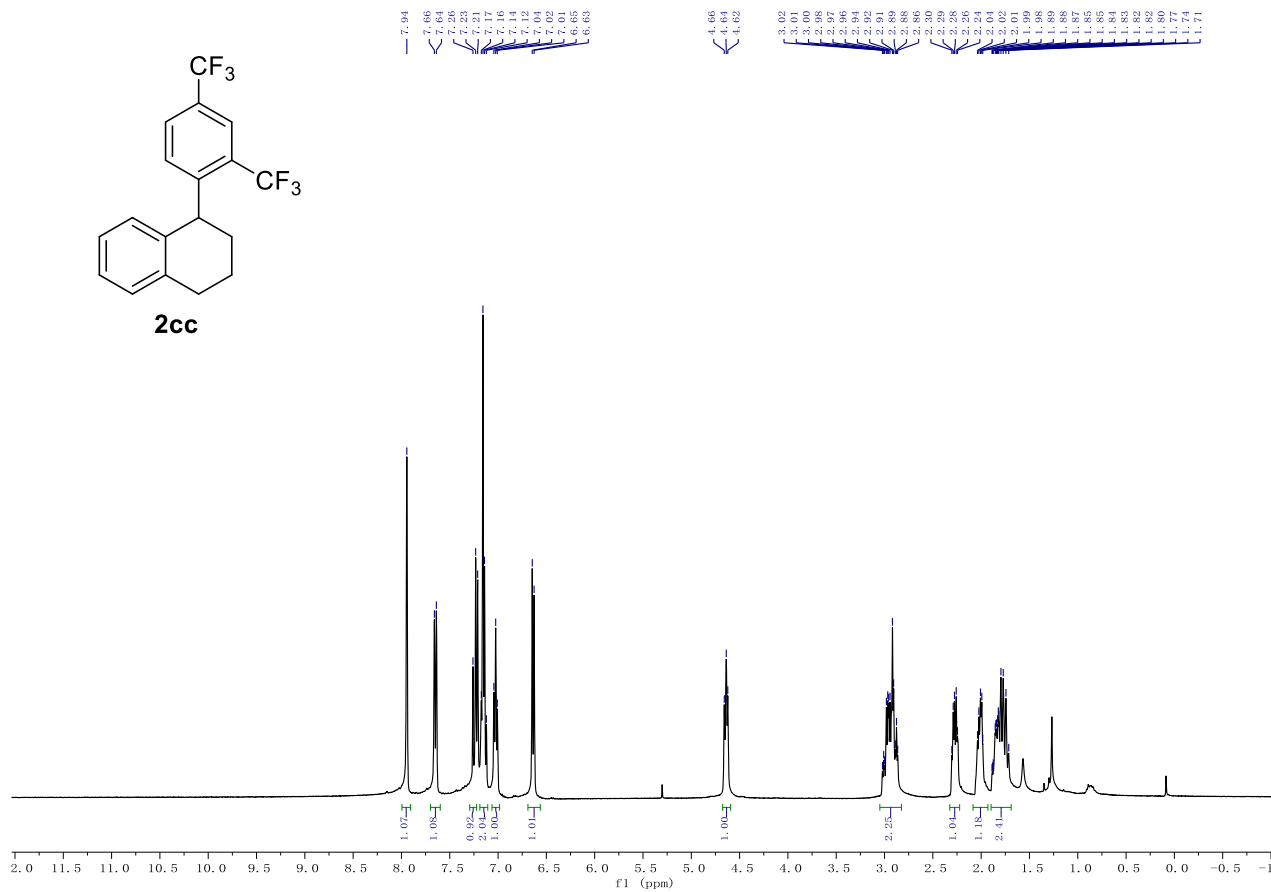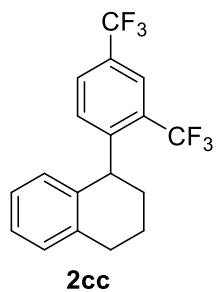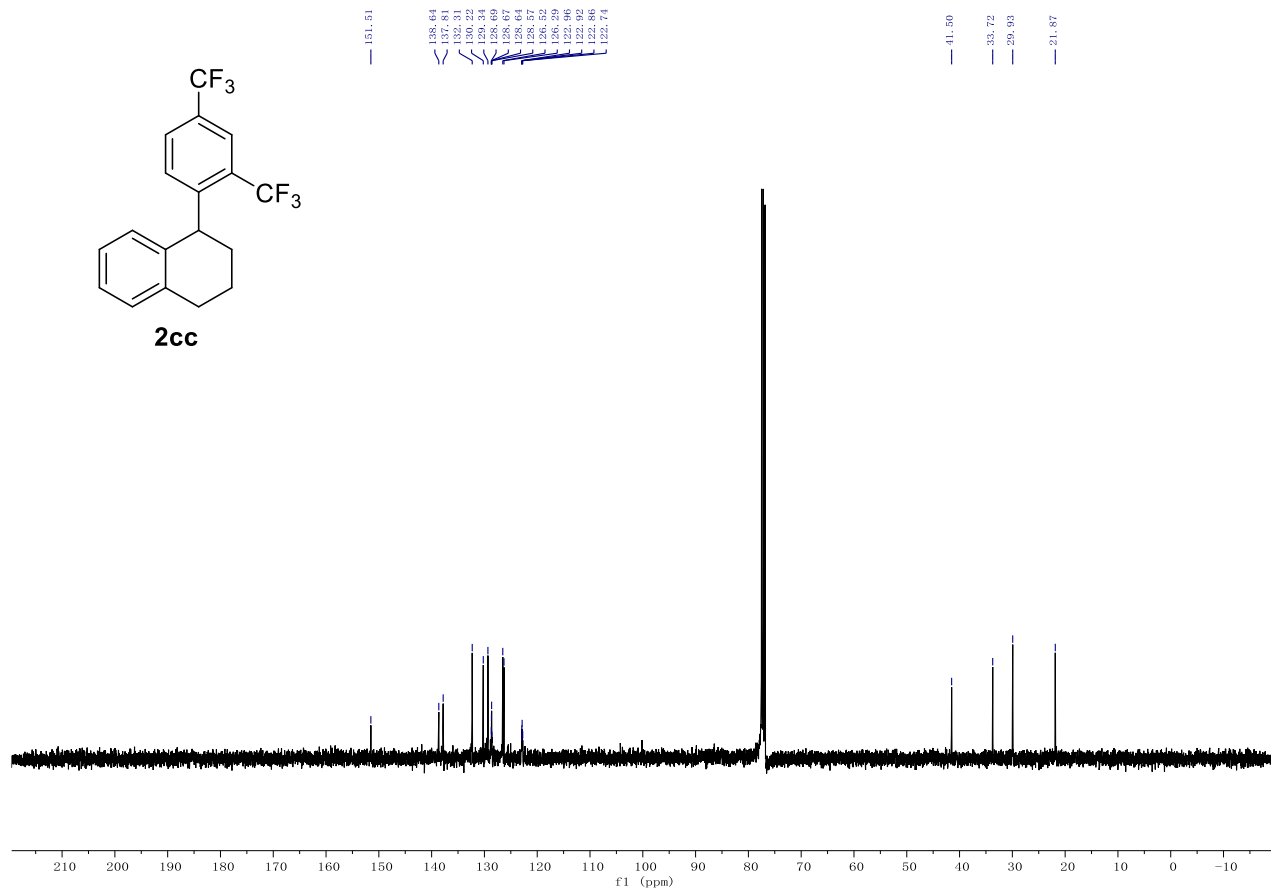

7.26  
7.15  
7.14  
7.13  
7.12  
7.12  
7.07  
7.05  
7.04  
6.74  
6.72  
4.57  
4.52  
3.00  
2.98  
2.97  
2.96  
2.95  
2.94  
2.93  
2.92  
2.91  
2.90  
2.89  
2.87  
2.85  
2.84  
2.83  
2.19  
2.18  
2.17  
2.17  
2.16  
2.16  
2.16  
2.15  
2.14  
2.14  
2.14  
2.12  
2.12  
2.11  
2.10  
2.09  
2.08  
2.07  
2.06  
2.05  
2.04  
2.04  
2.03  
2.02  
2.01  
2.00  
2.00  
1.98  
1.98  
1.98  
1.97  
1.96  
1.95  
1.95  
1.88  
1.87  
1.86  
1.85  
1.85  
1.84  
1.83  
1.82  
1.81  
1.80  
1.80

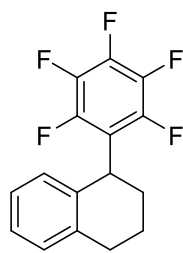

2dd

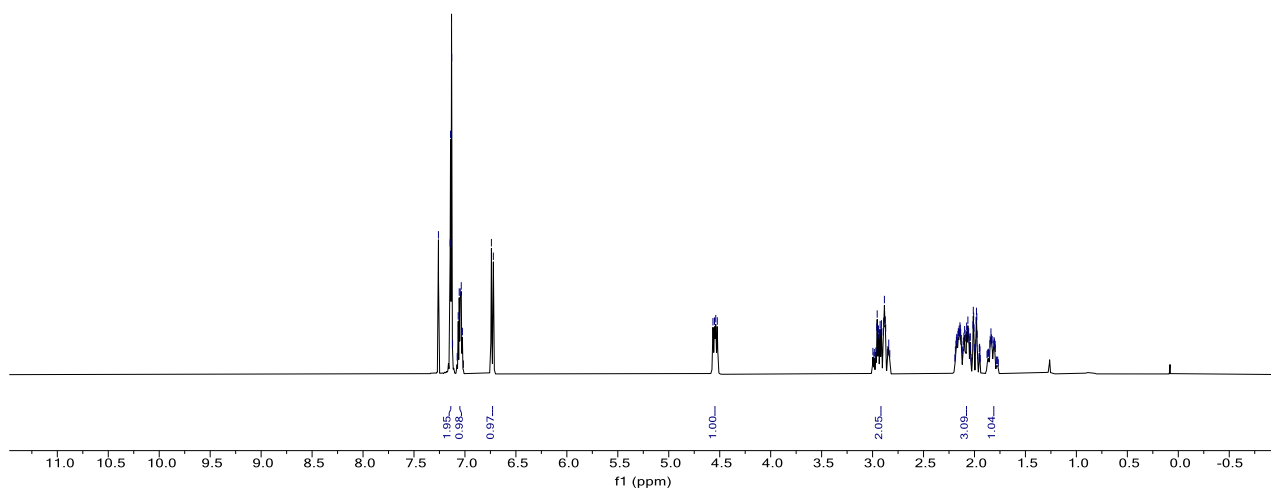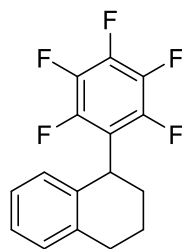

2dd

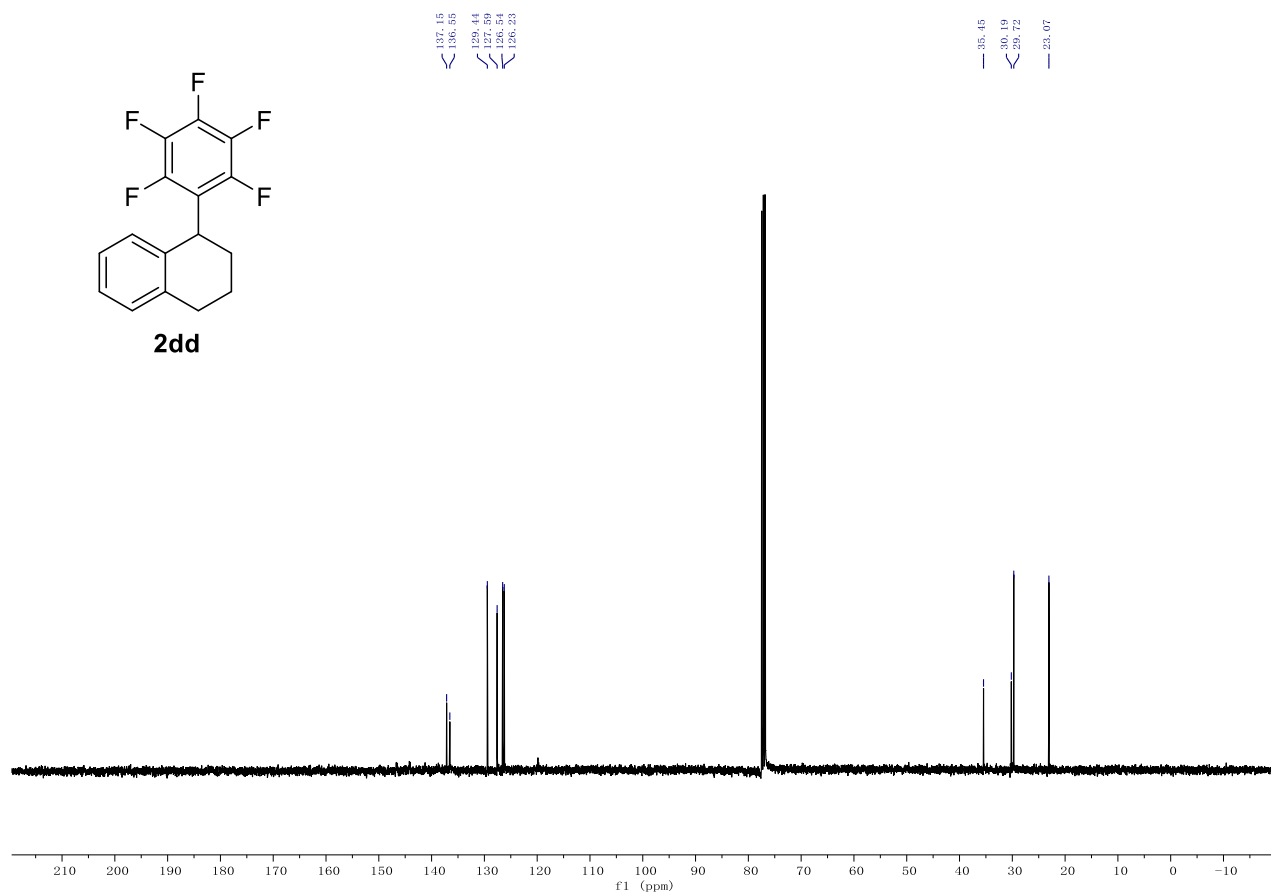

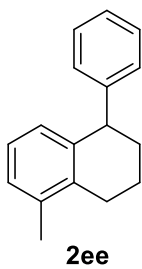

7.30  
7.29  
7.27  
7.27  
7.26  
7.24  
7.21  
7.20  
7.19  
7.11  
7.10  
7.04  
7.03  
6.89  
6.88  
6.86  
6.94  
6.73

4.17  
4.16  
4.15

2.79  
2.78  
2.76  
2.75  
2.74  
2.73  
2.71  
2.70  
2.69  
2.17  
2.16  
2.15  
2.14  
2.14  
2.13  
2.12  
1.84  
1.83  
1.83  
1.82  
1.82  
1.81  
1.80  
1.79  
1.79  
1.78

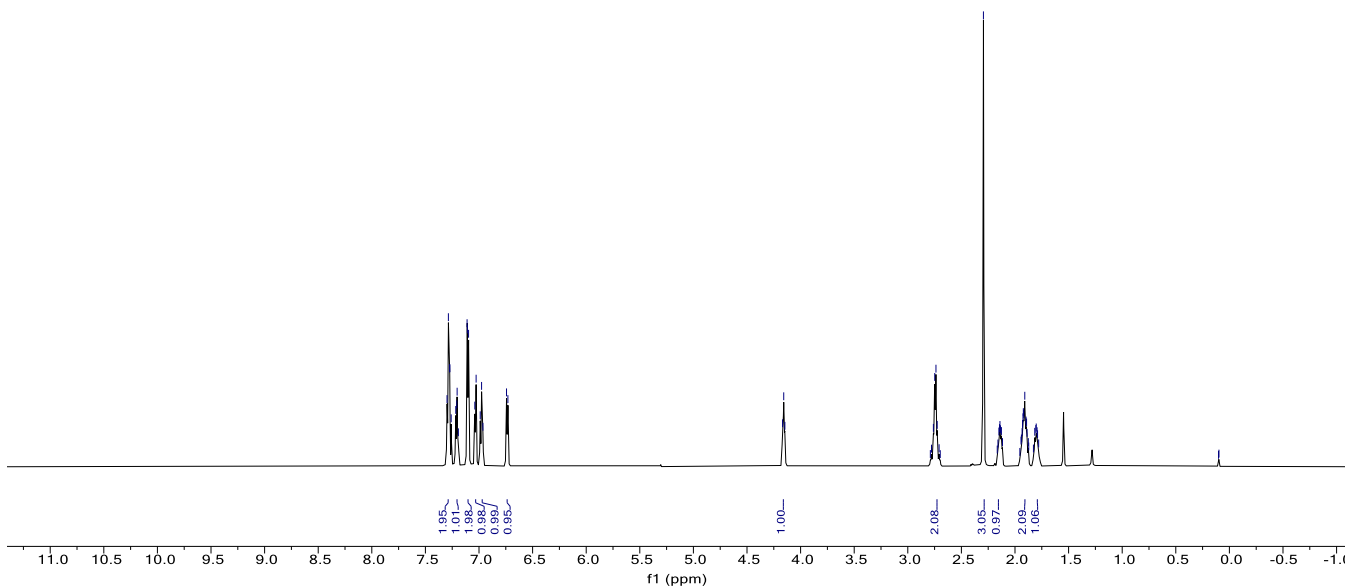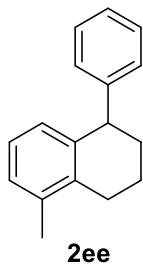

147.77  
139.36  
136.40  
136.04  
136.01  
135.27  
135.20  
137.57  
135.32

46.03

32.70

27.12

20.71

19.91

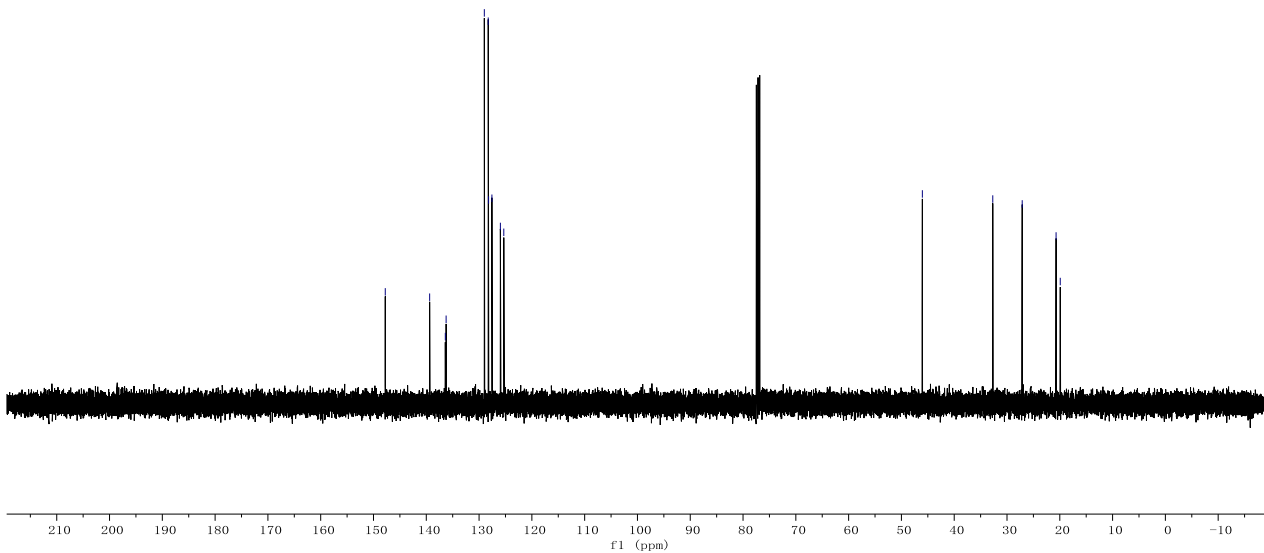

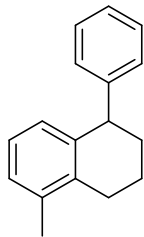

**2ff**  
p:o = 5.25:1

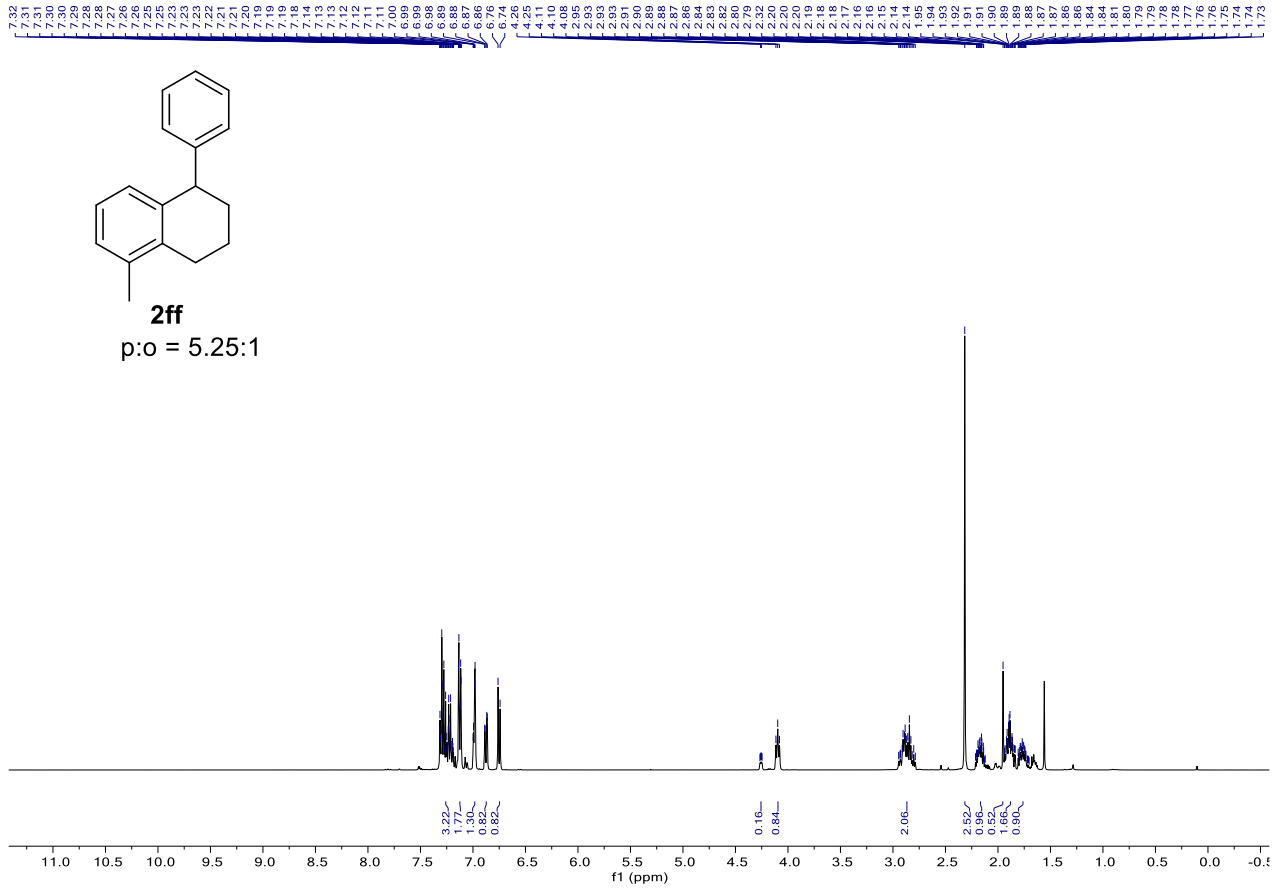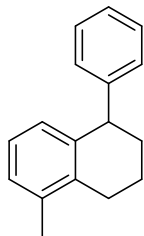

**2ff**  
p:o = 5.25:1

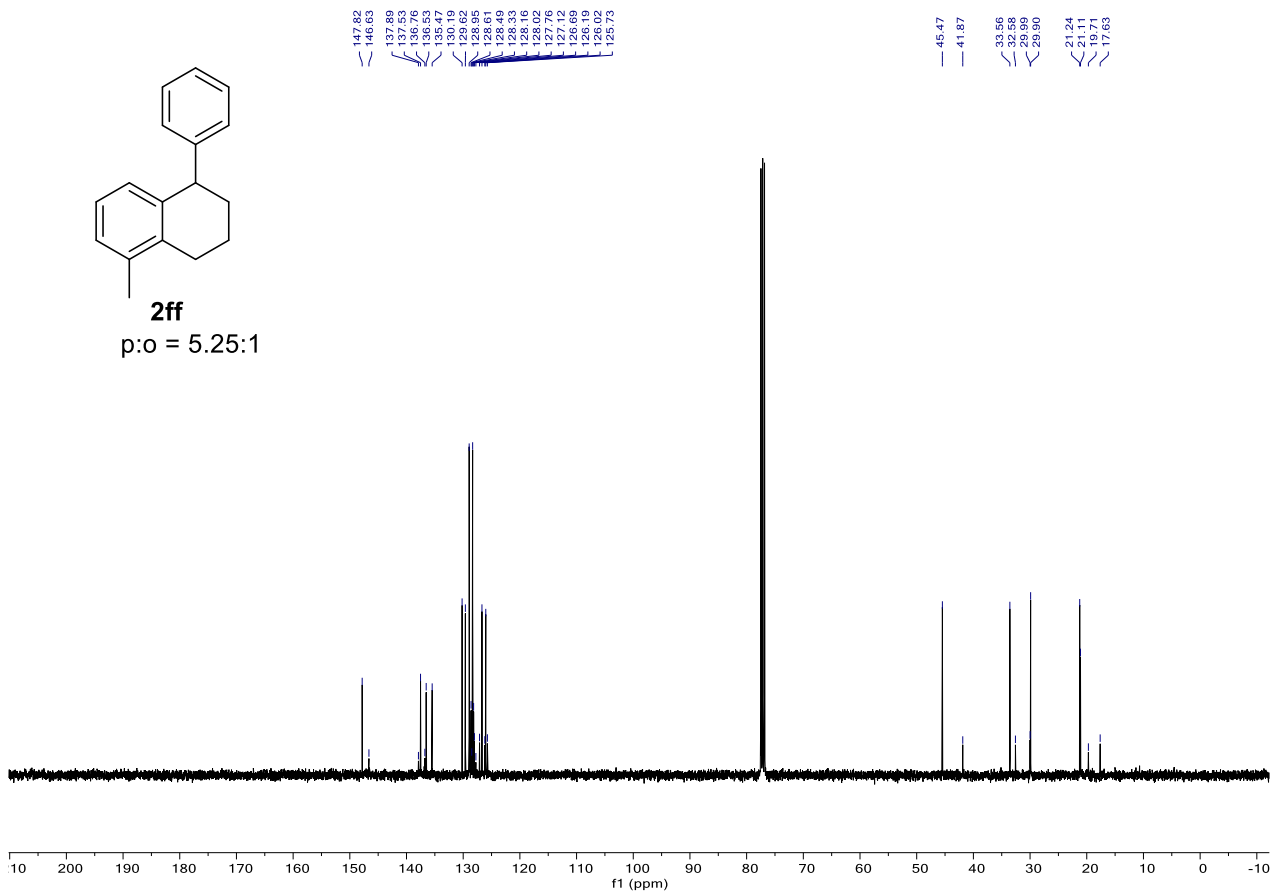



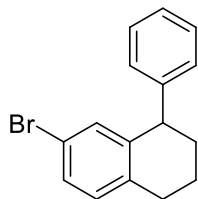

**2hh**

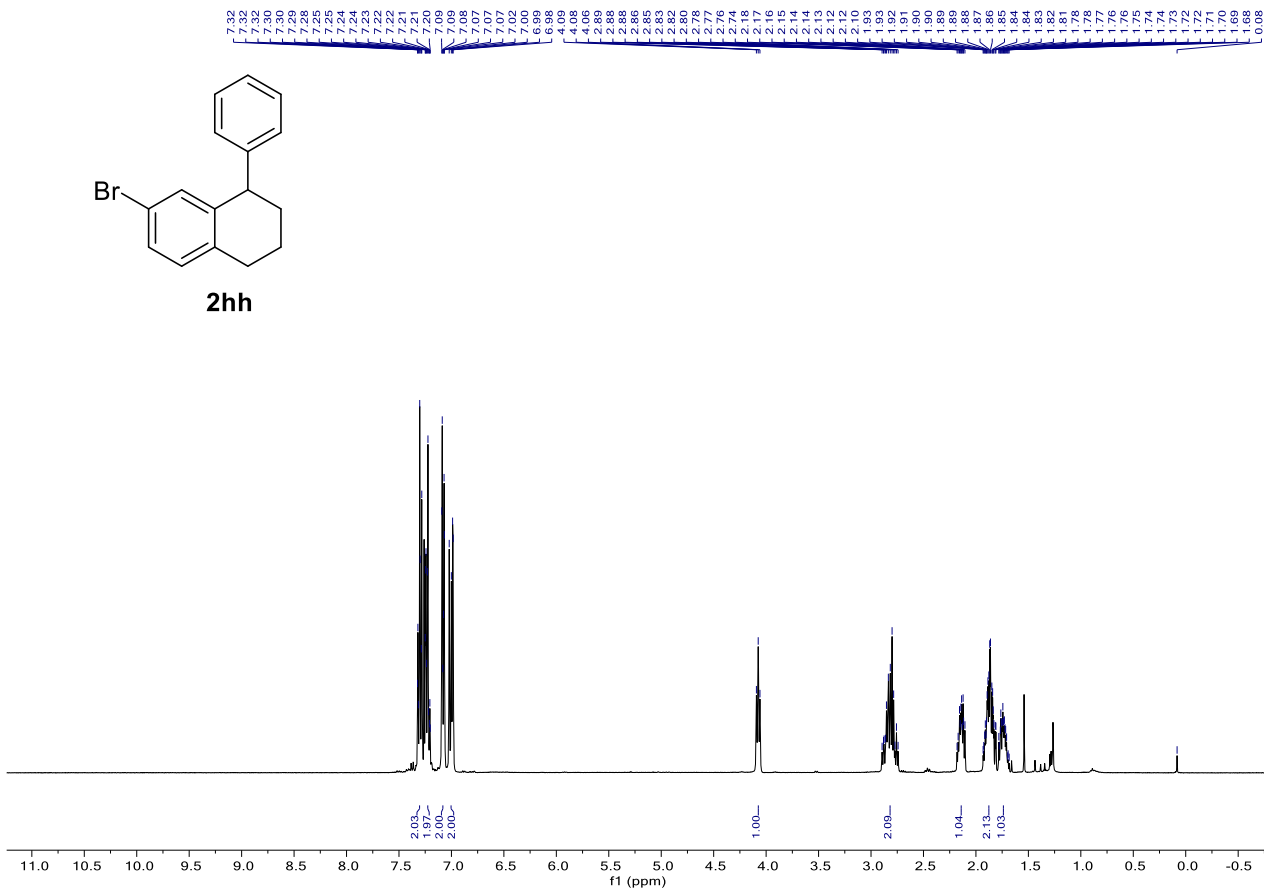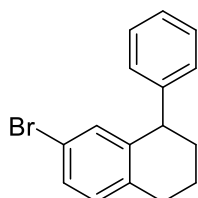

**2hh**

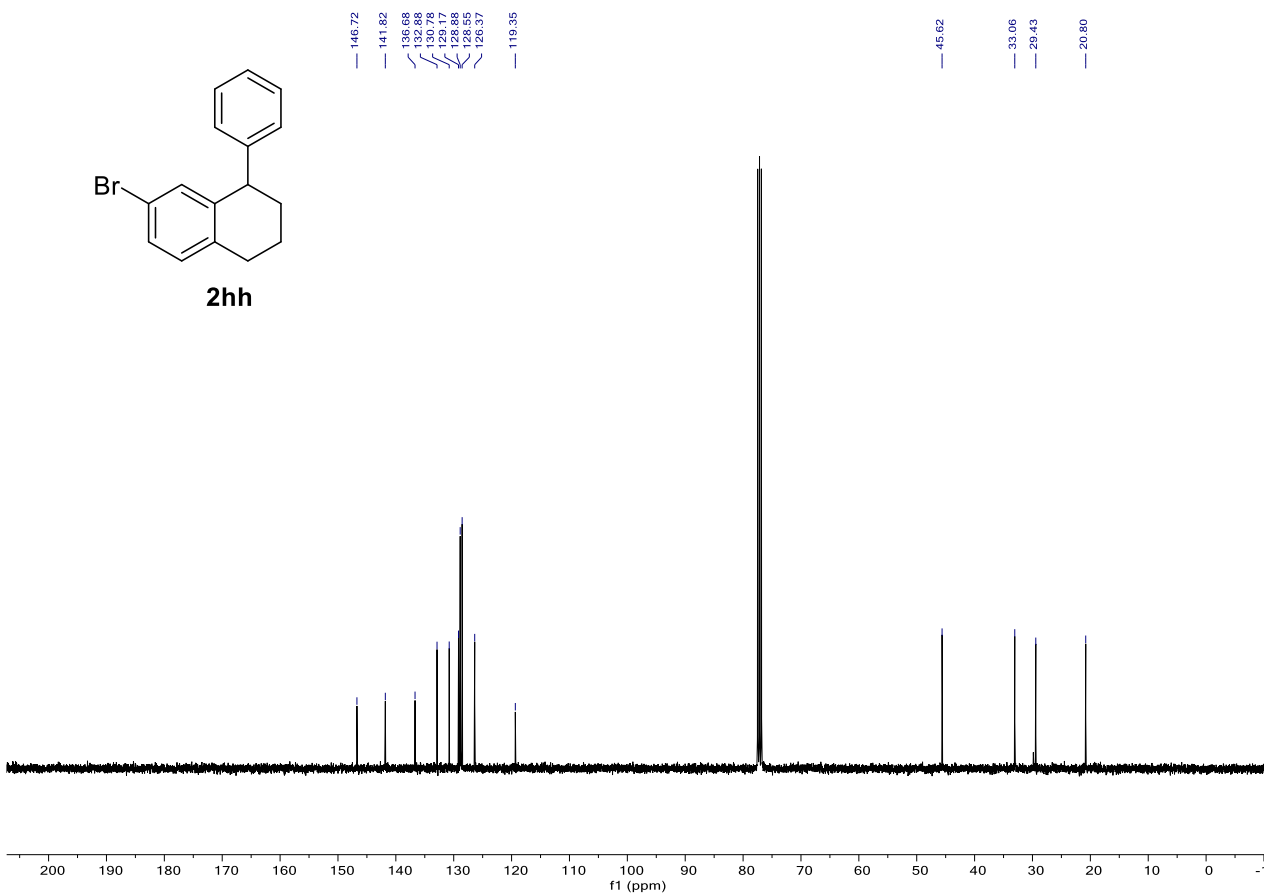

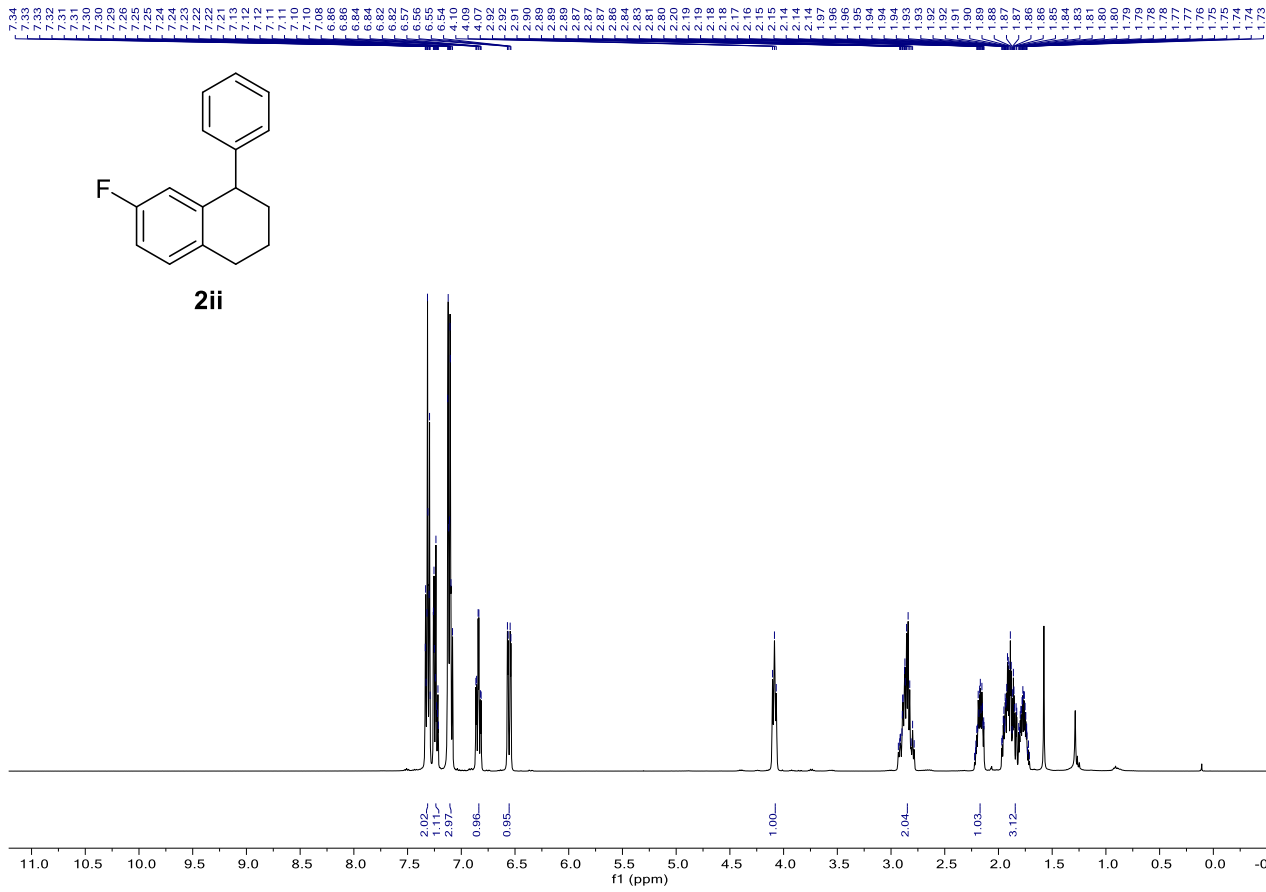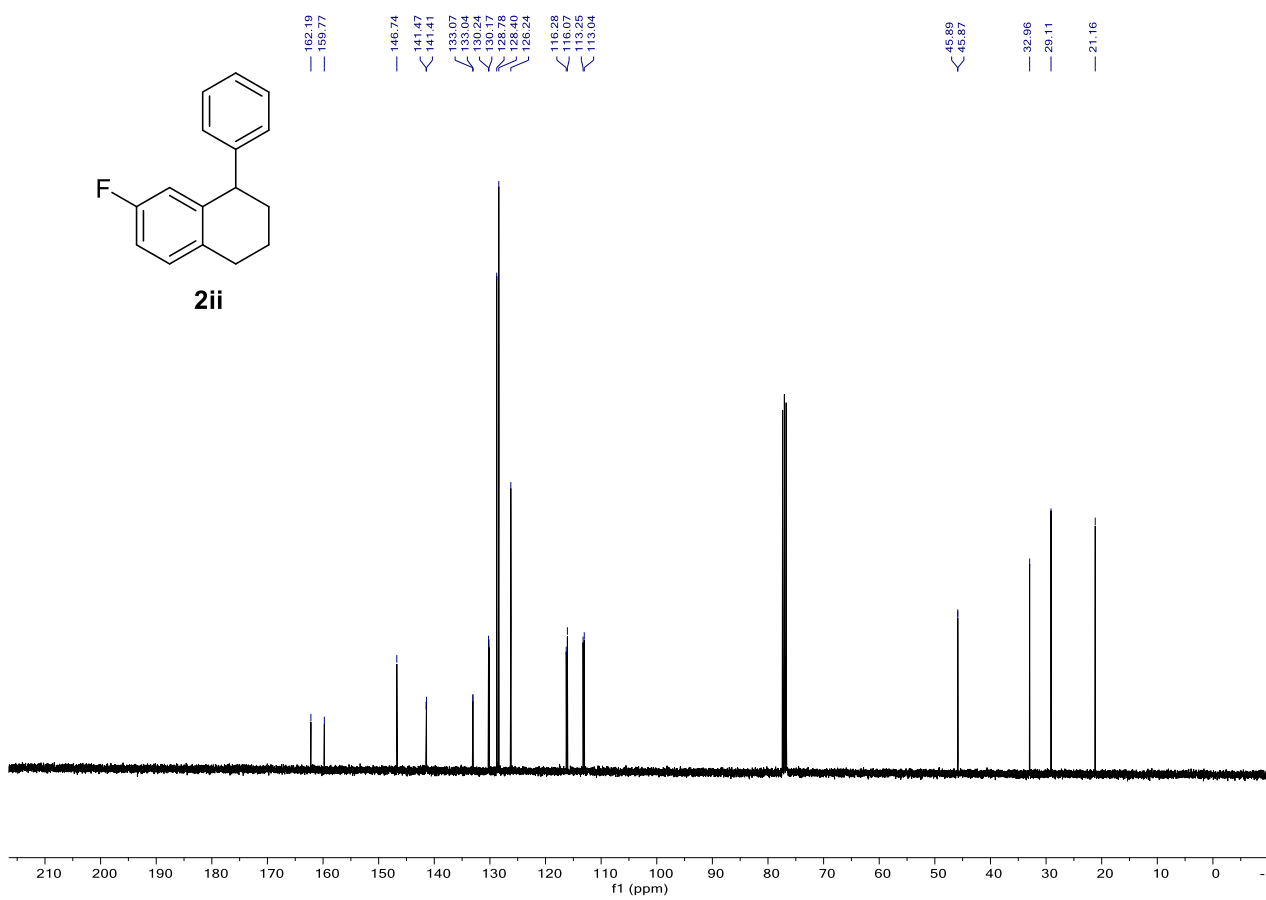

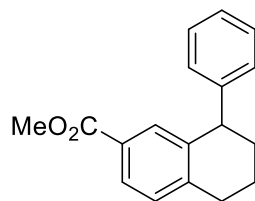

2jj

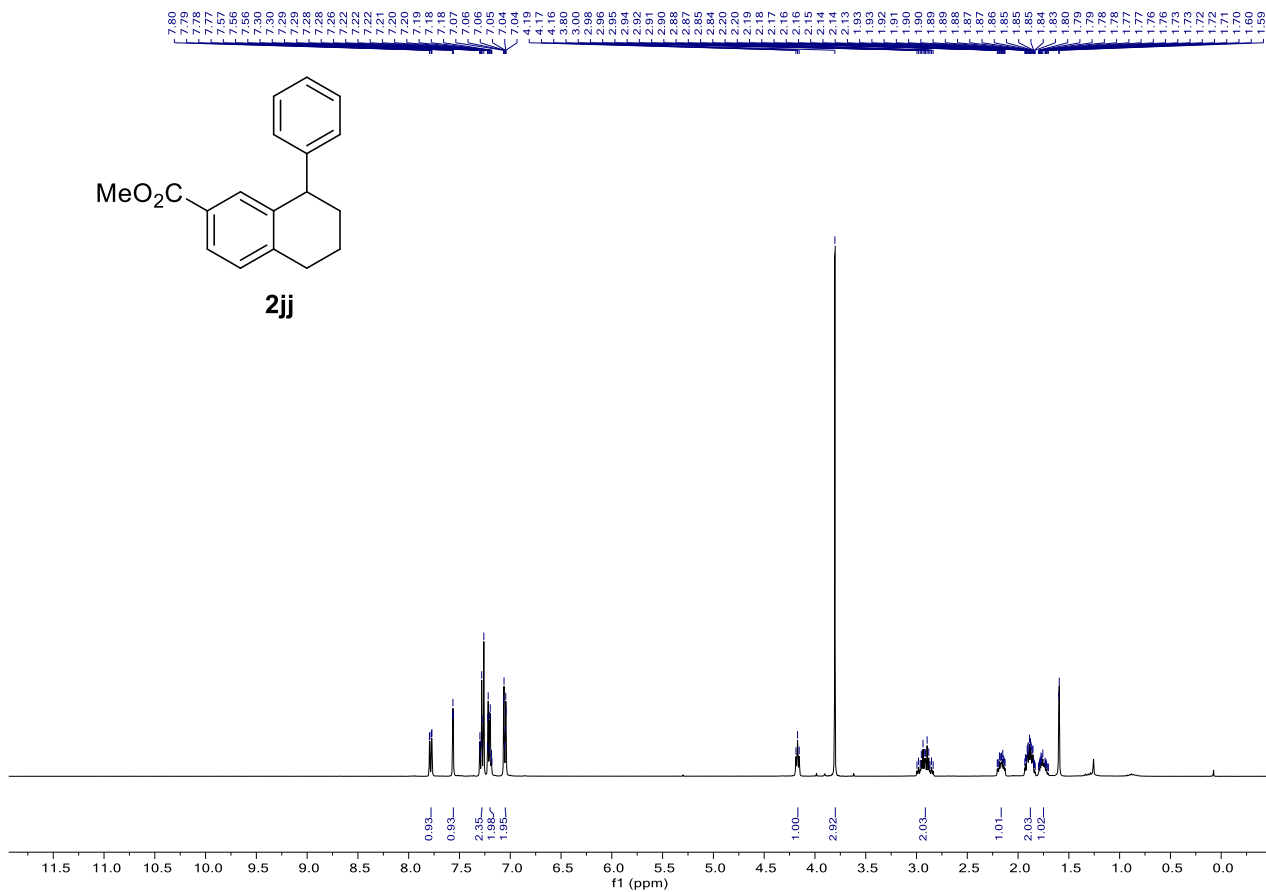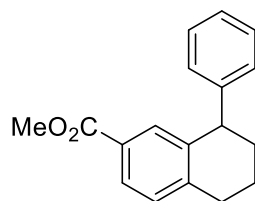

2jj

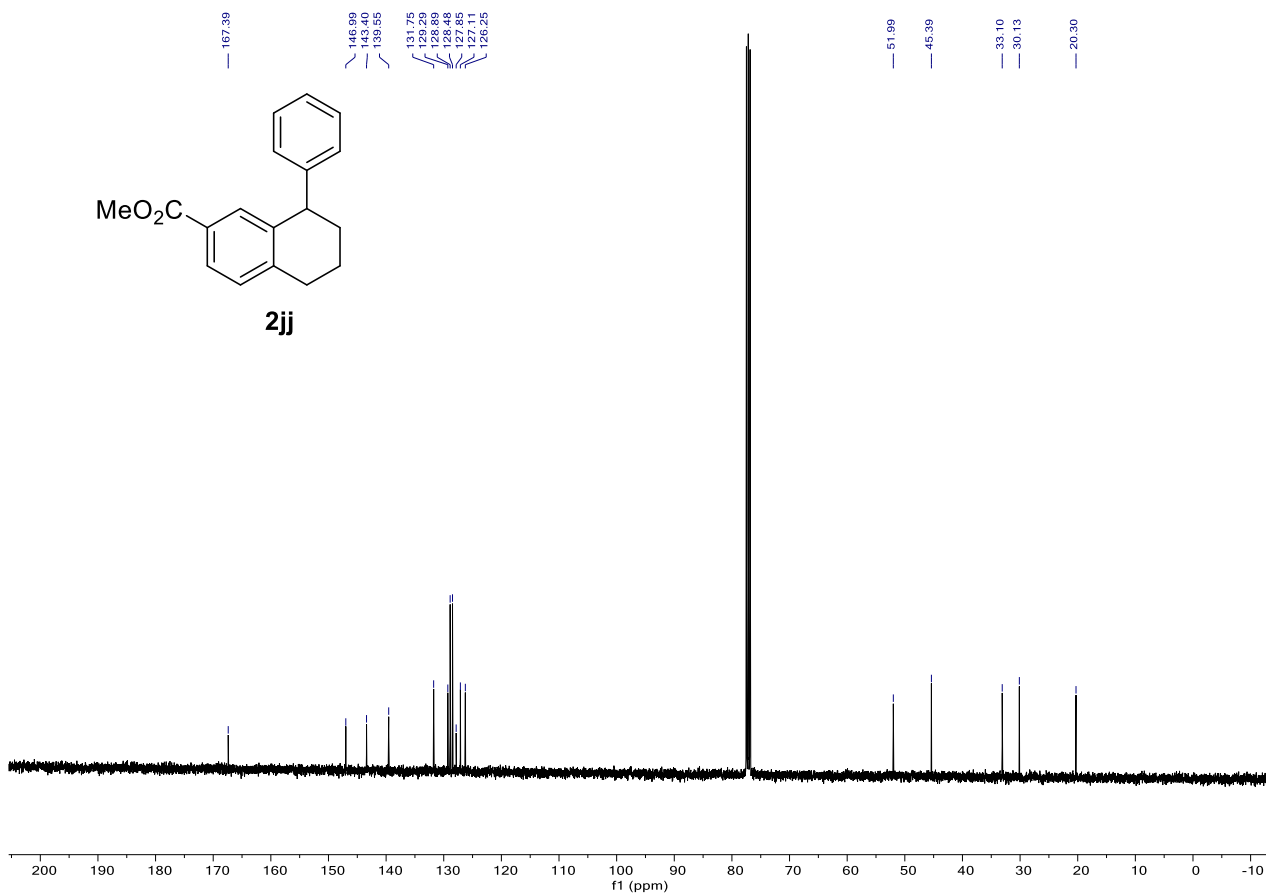



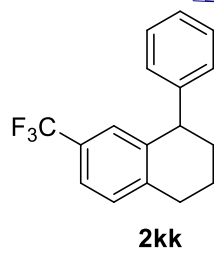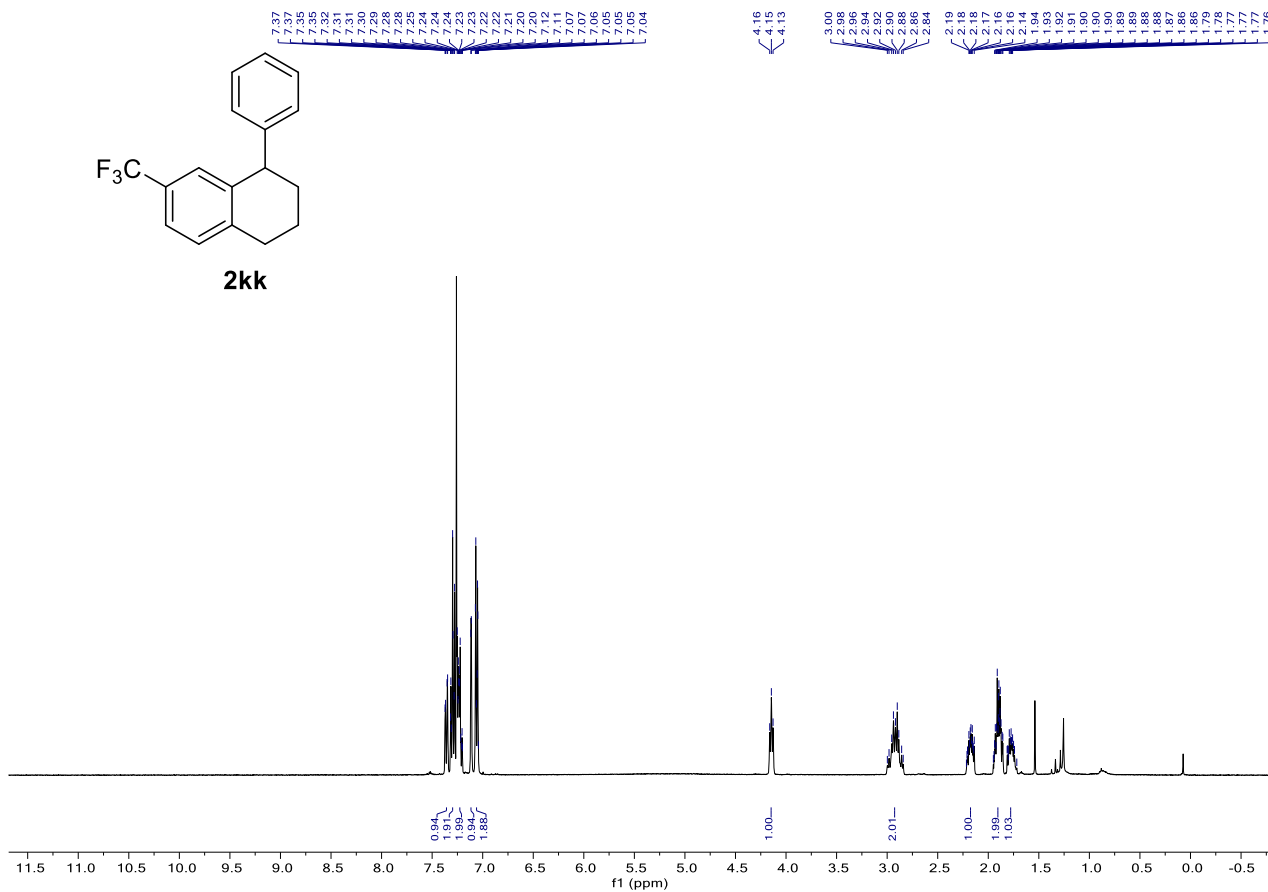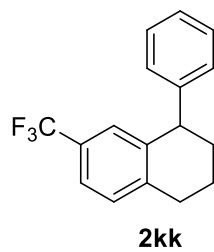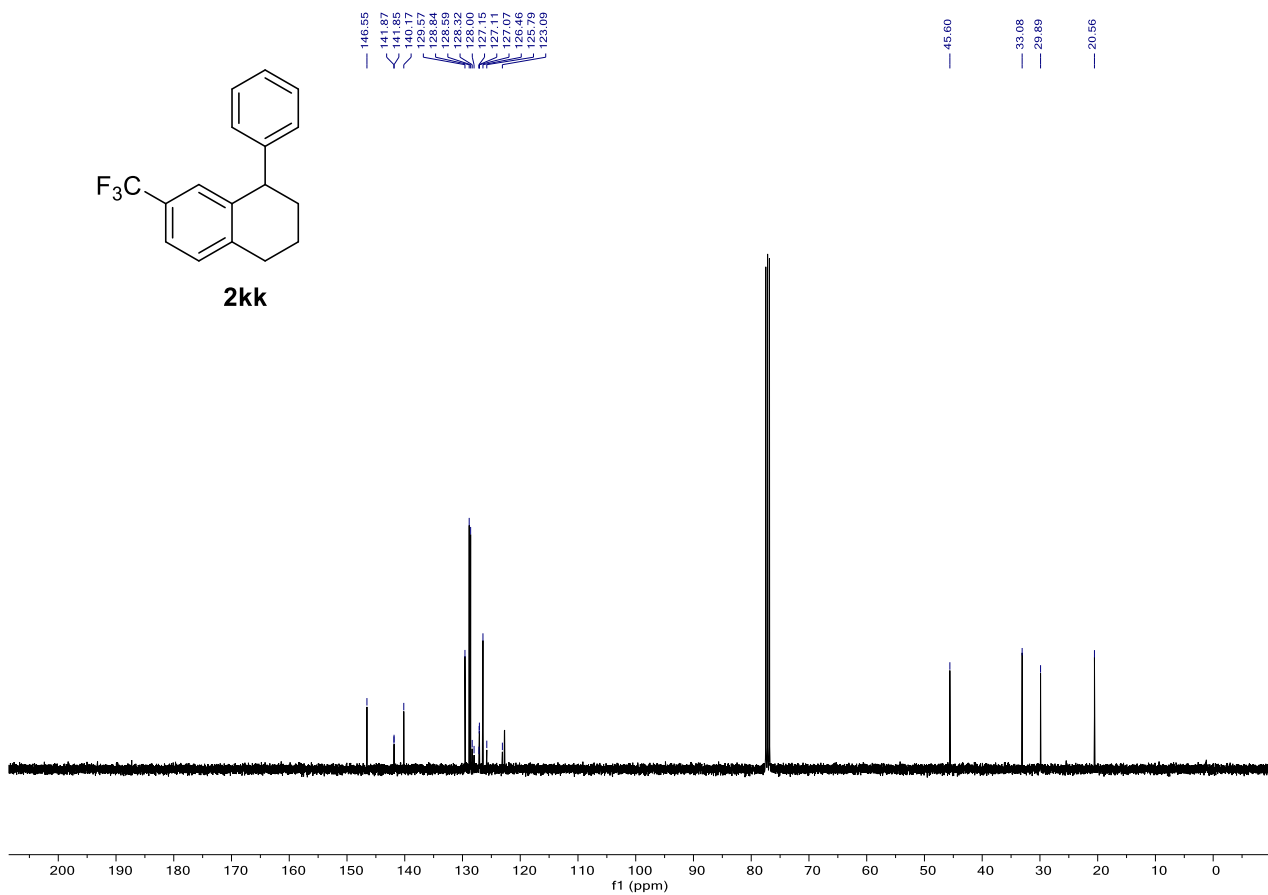

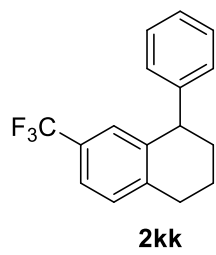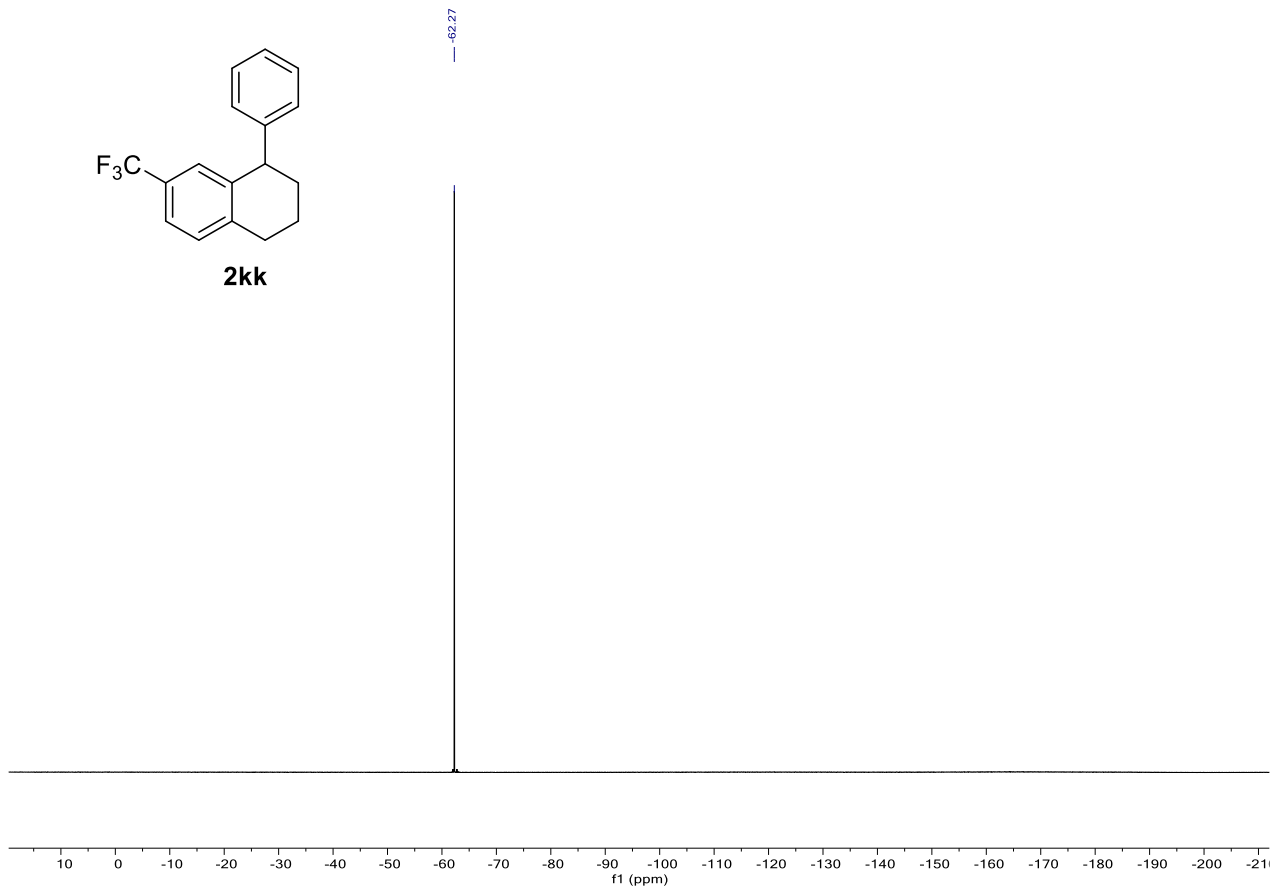

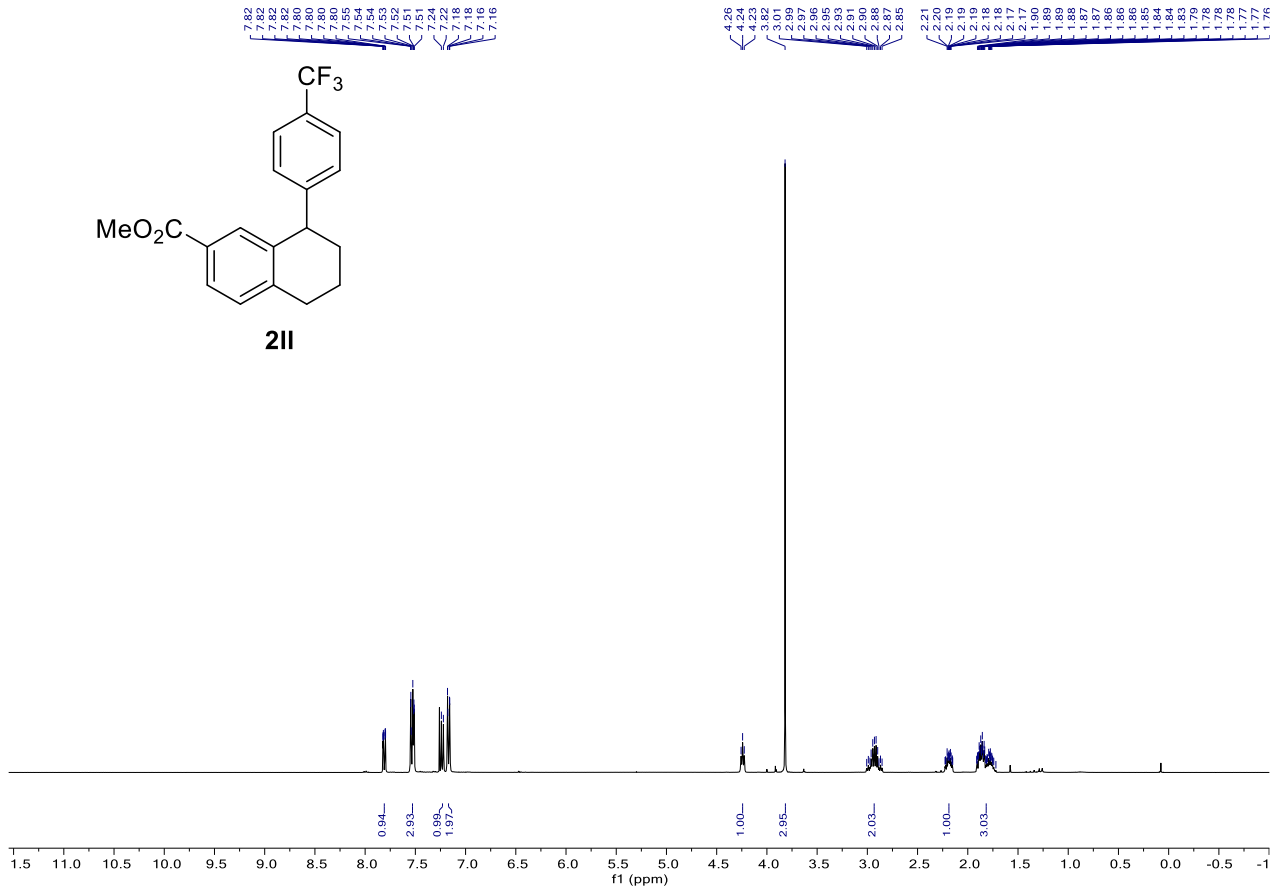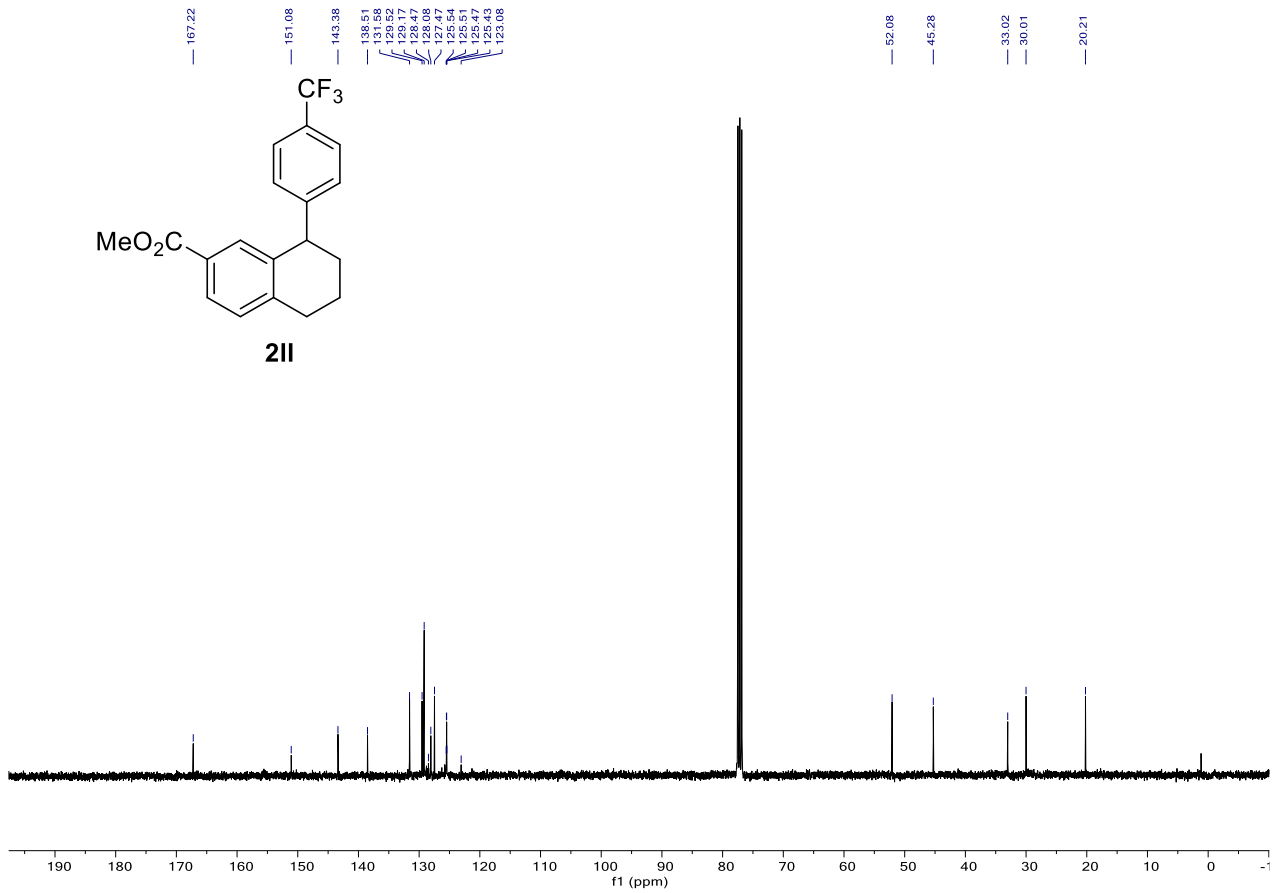

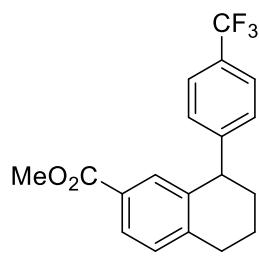

2II

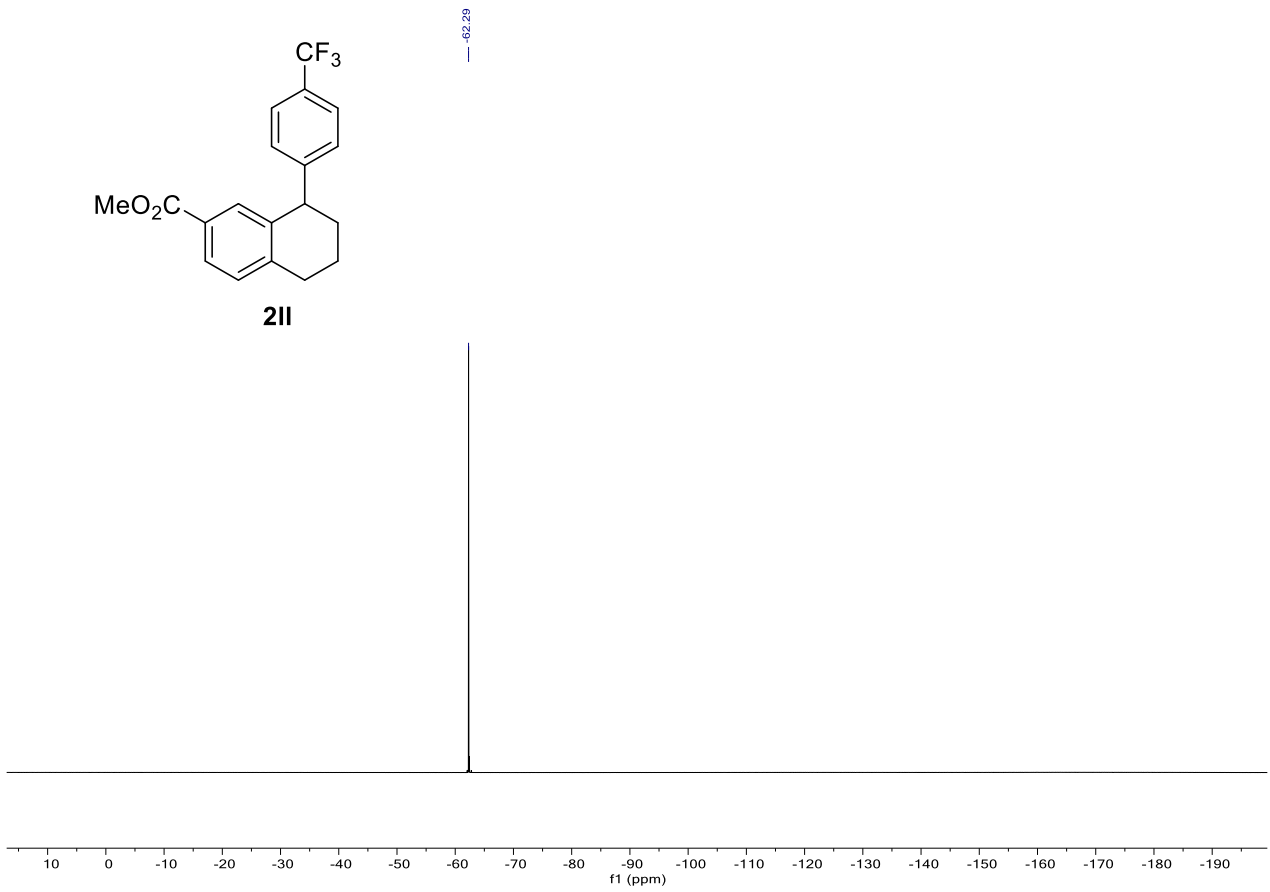

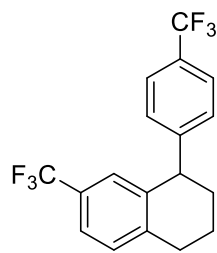

2mm

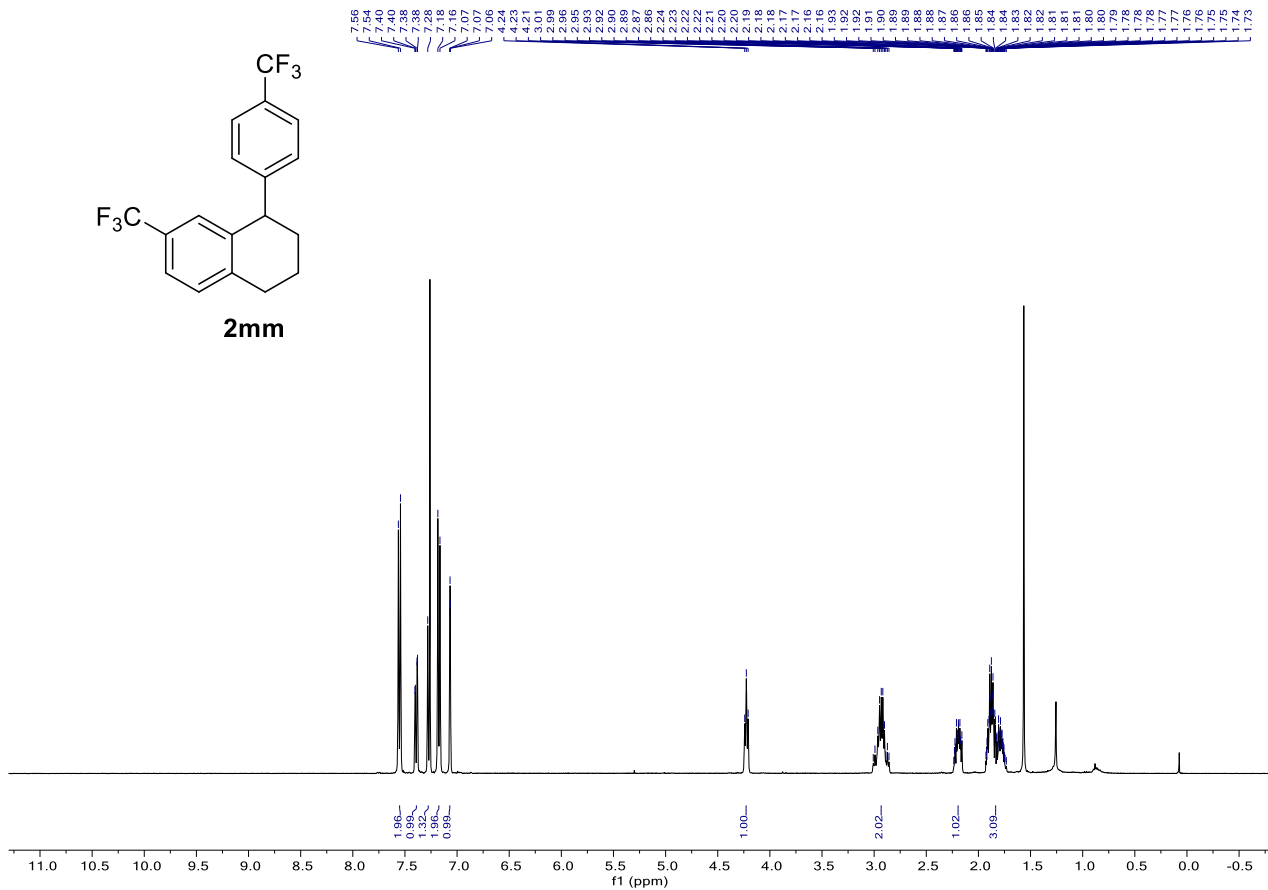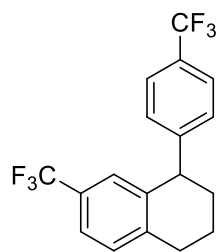

2mm

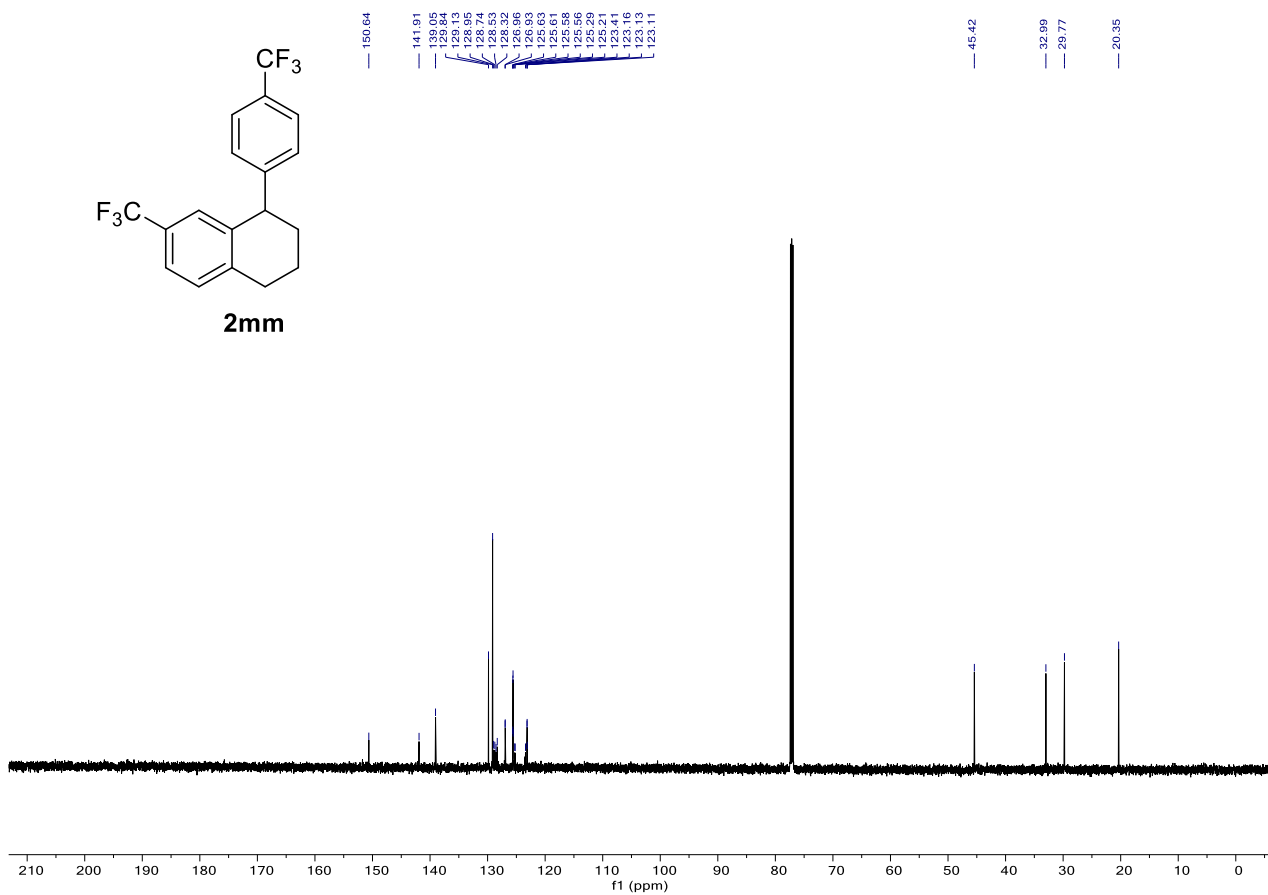

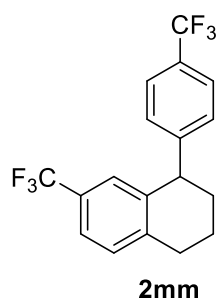

-62.34

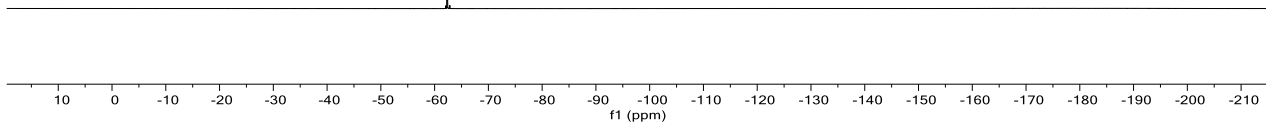

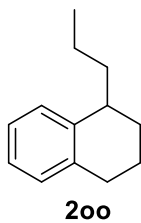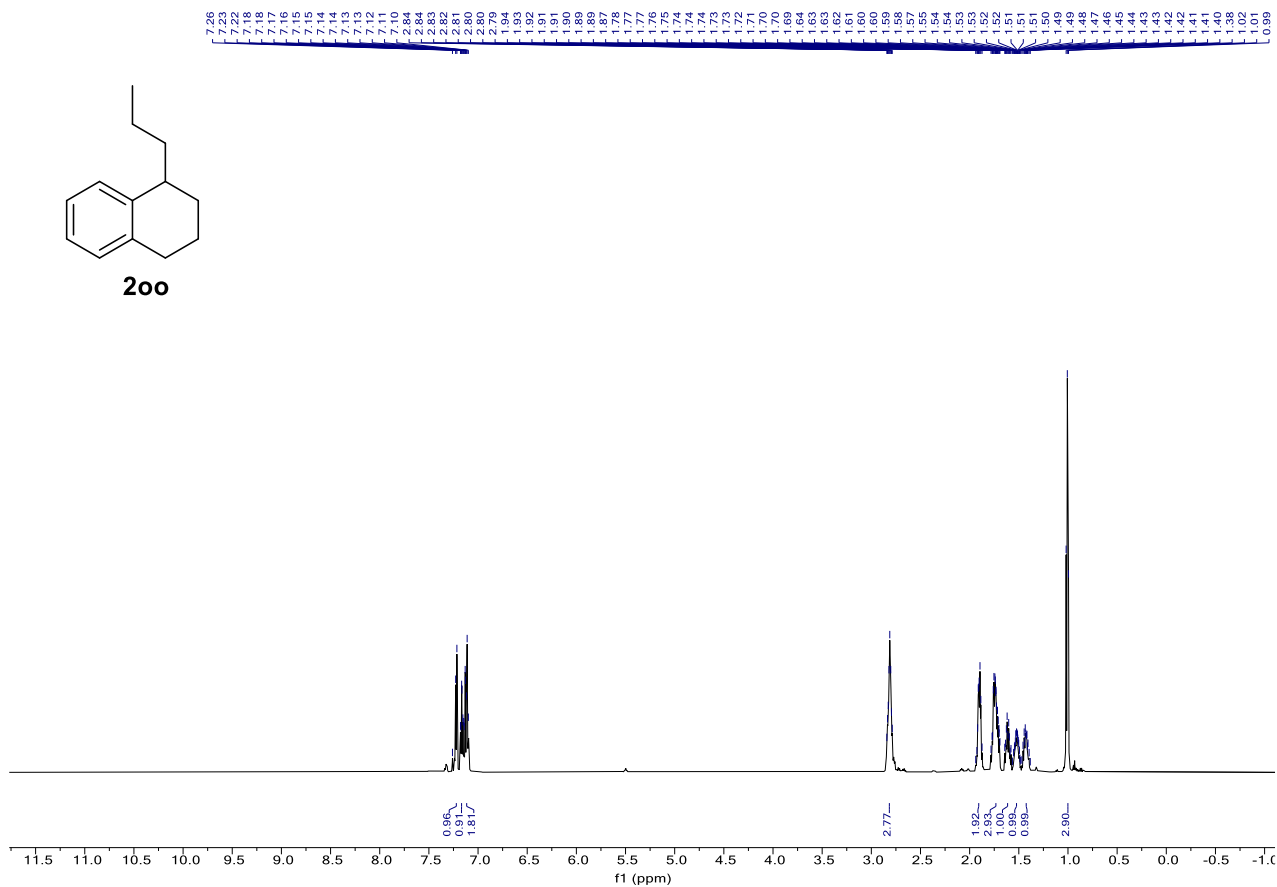

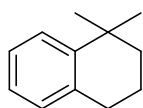

2pp

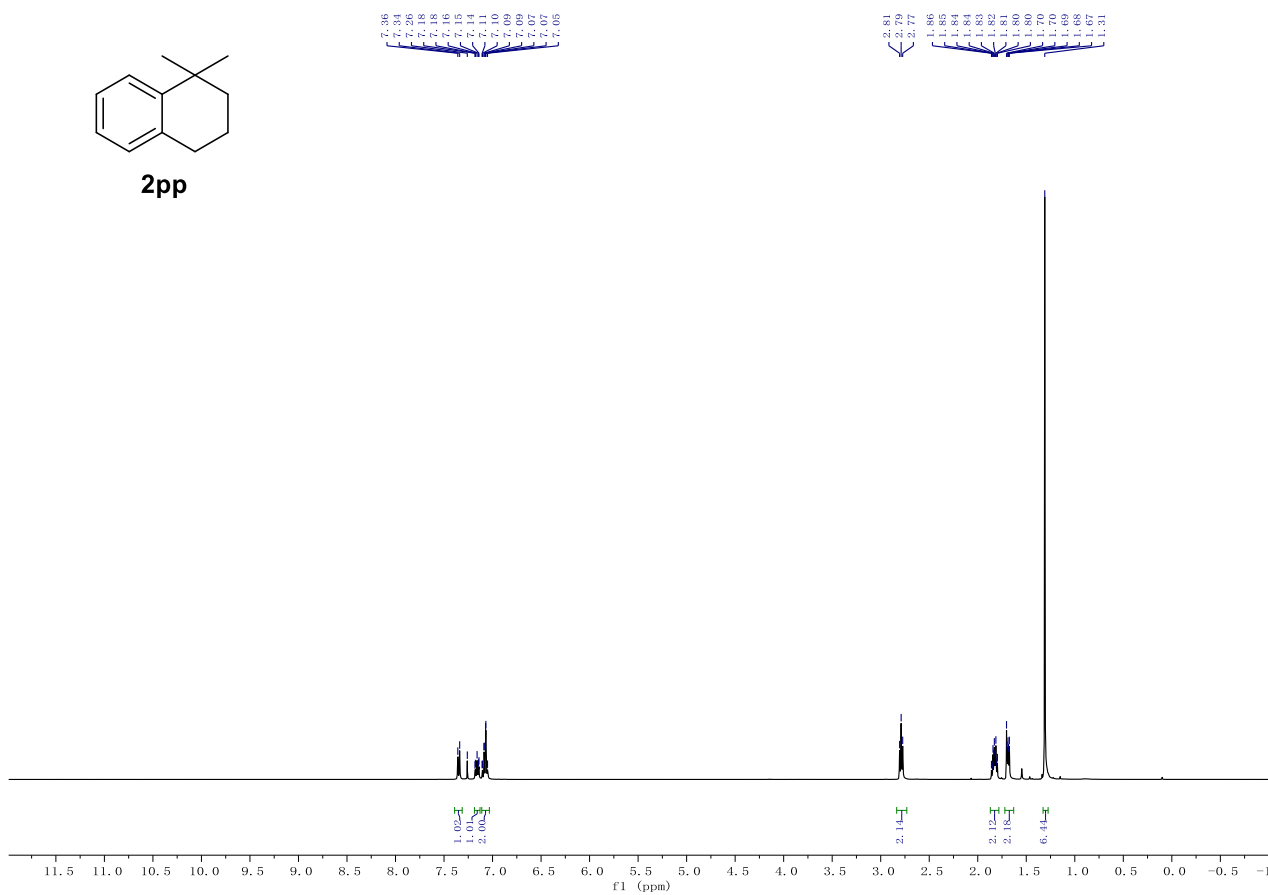



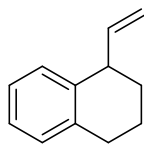

2qq

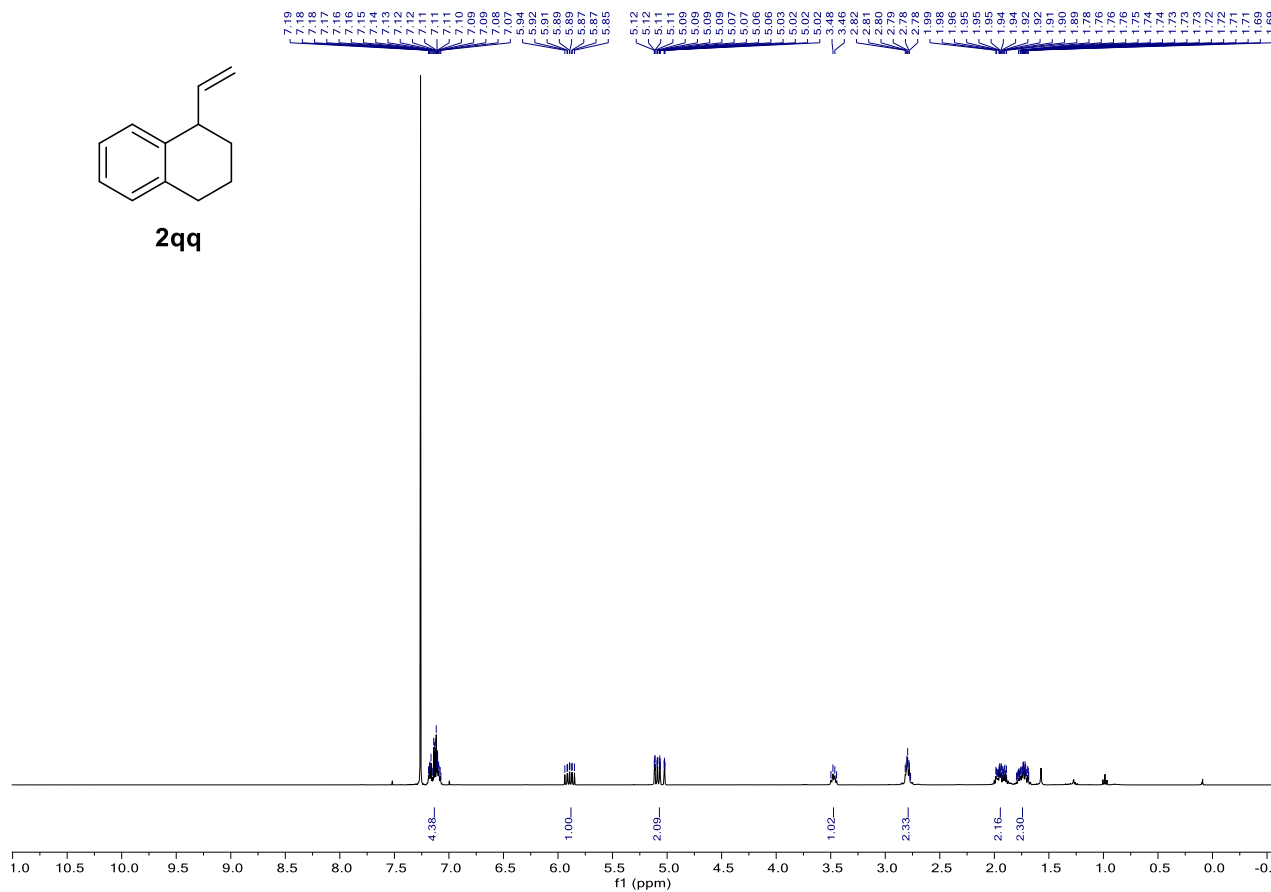

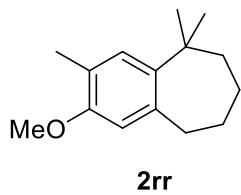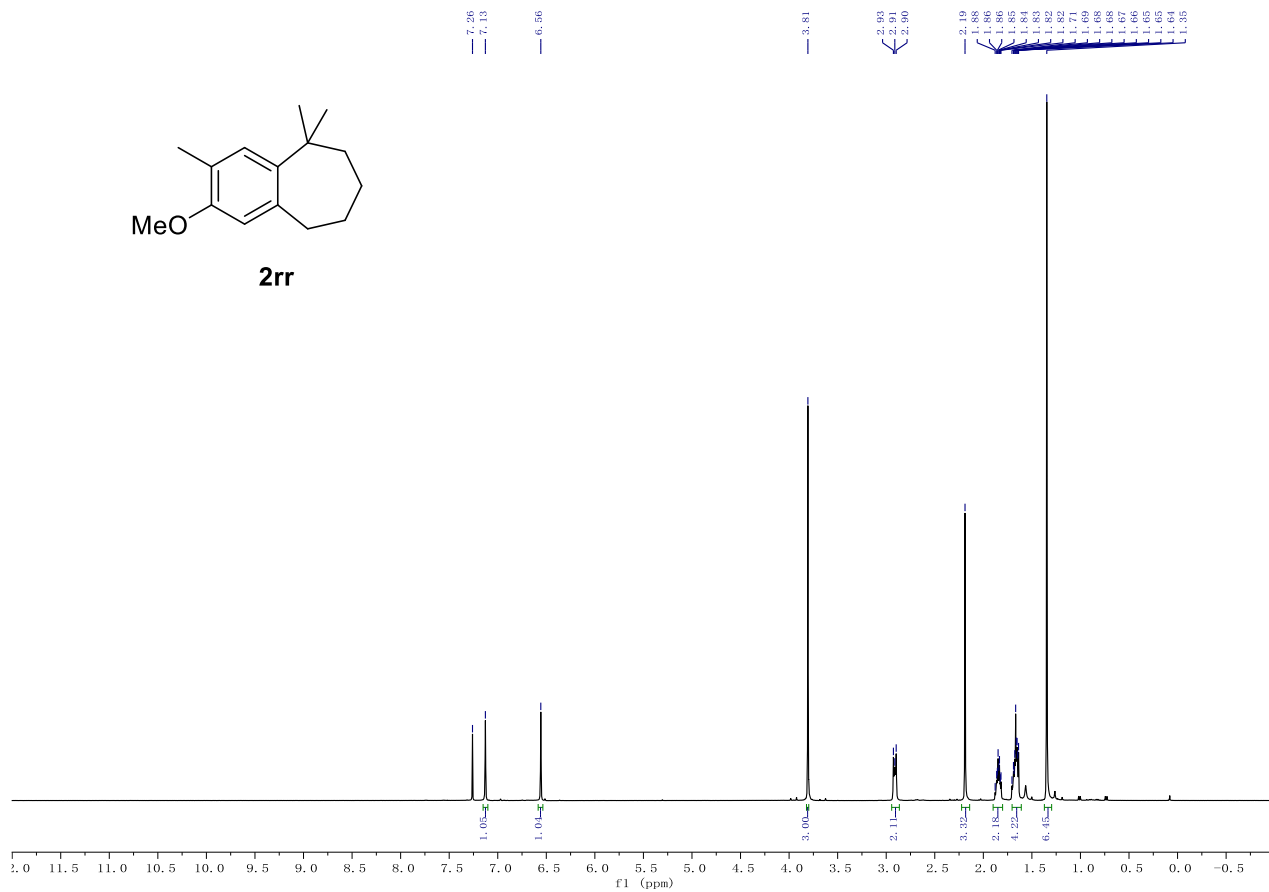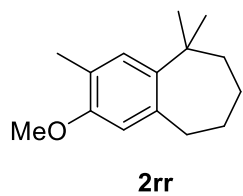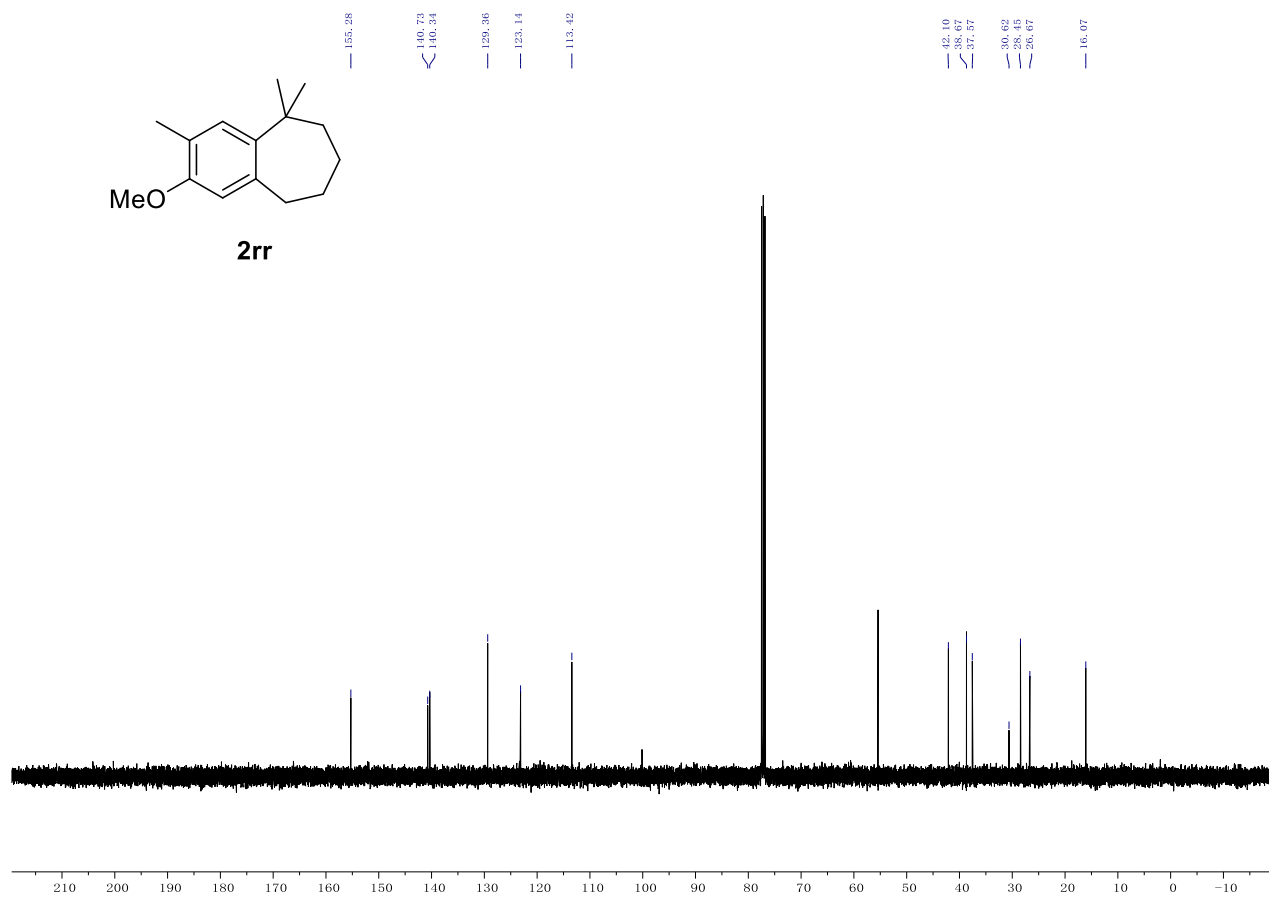

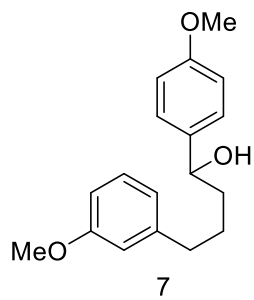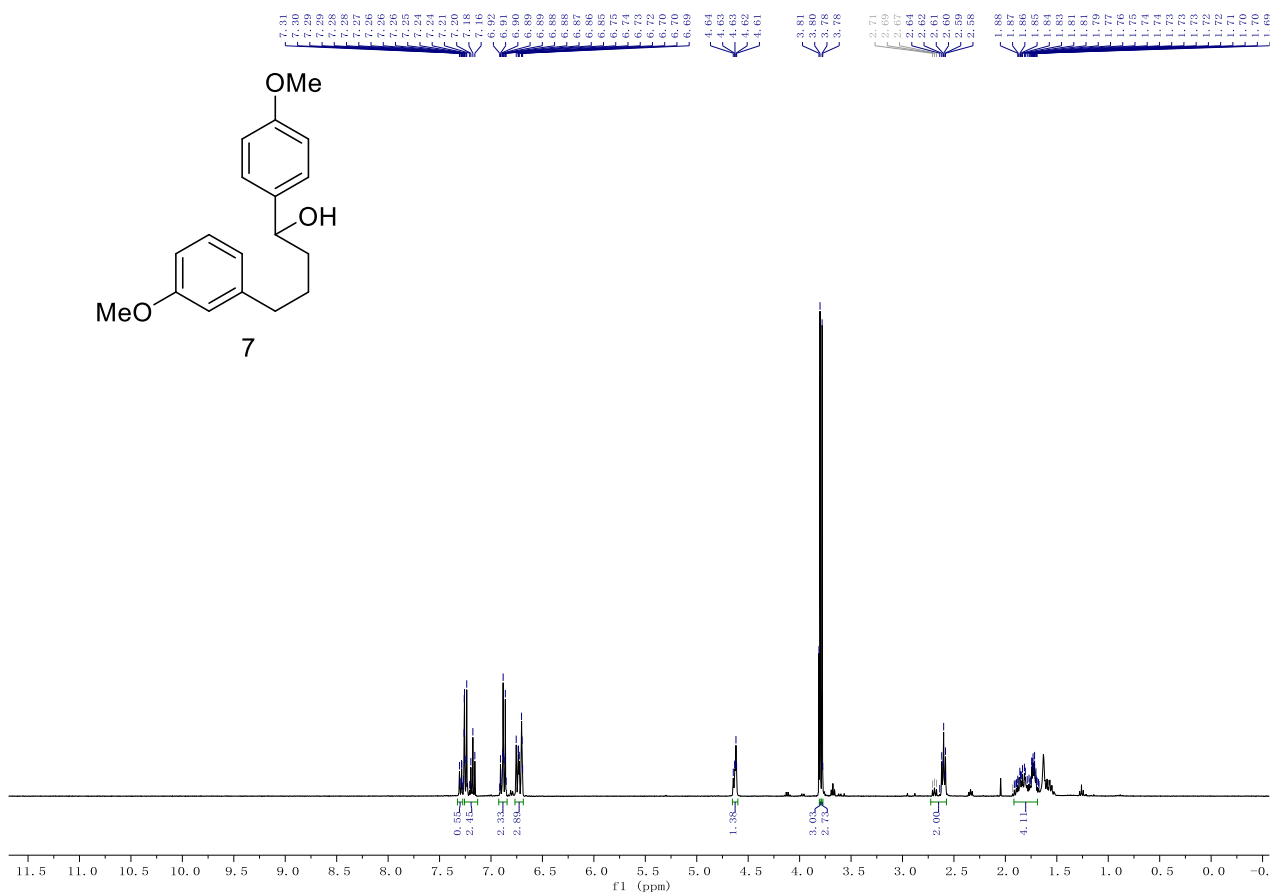

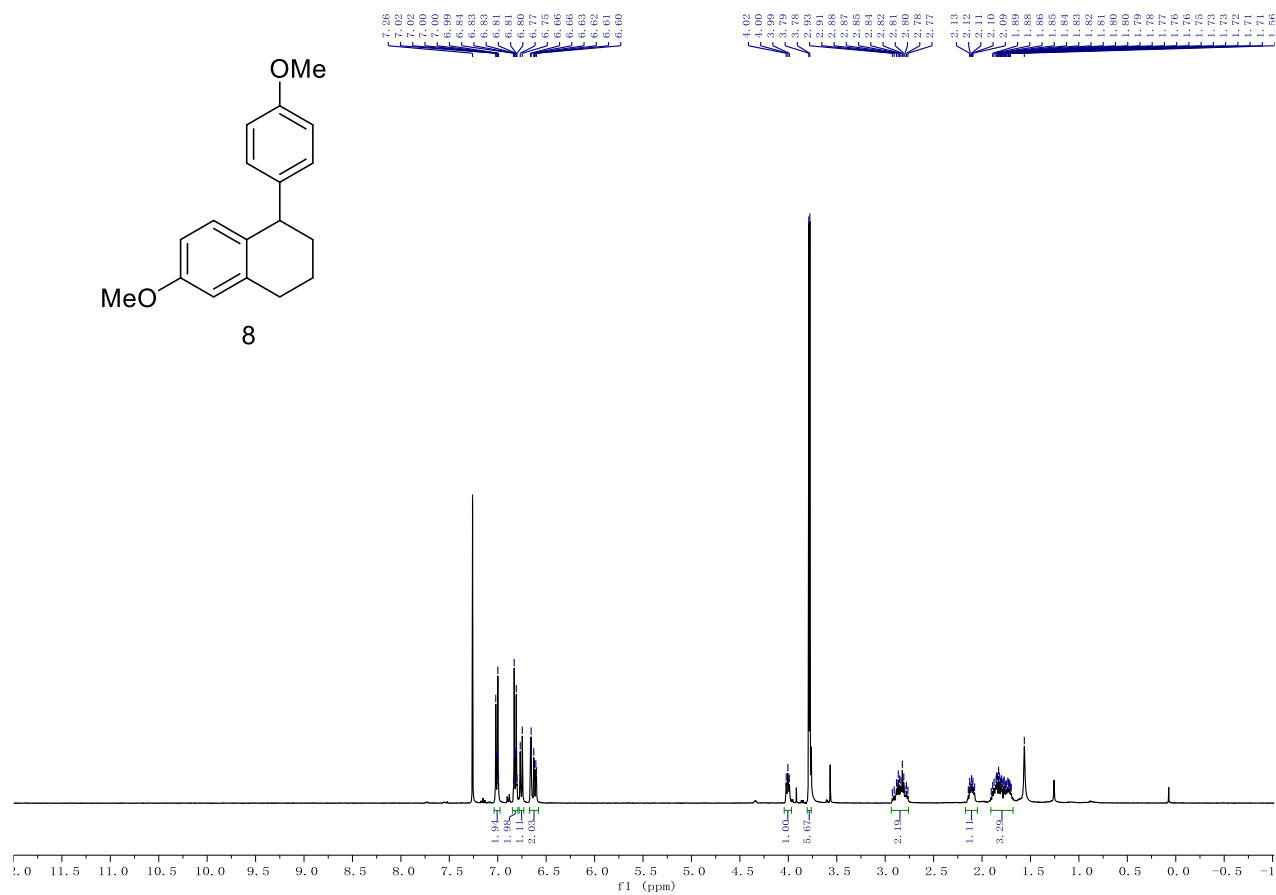

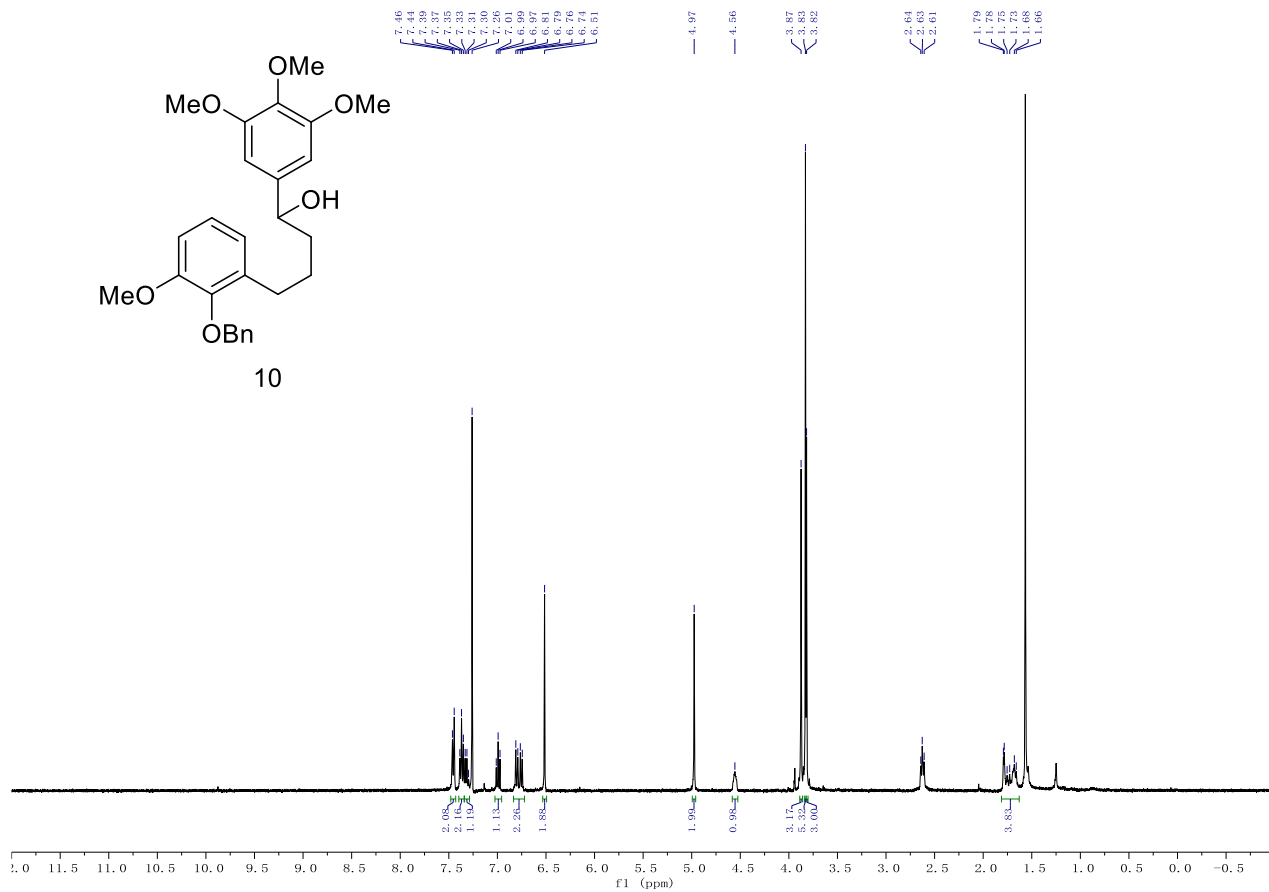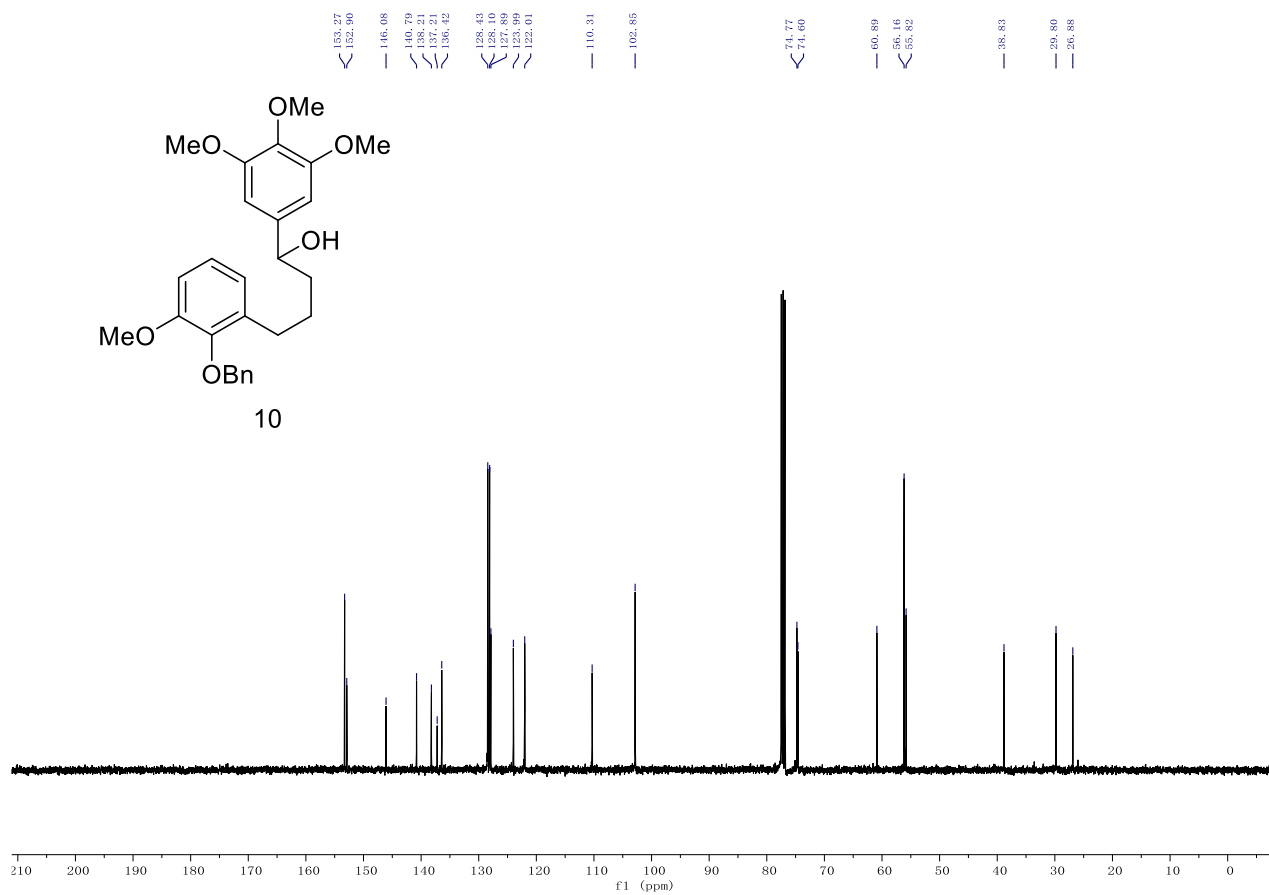

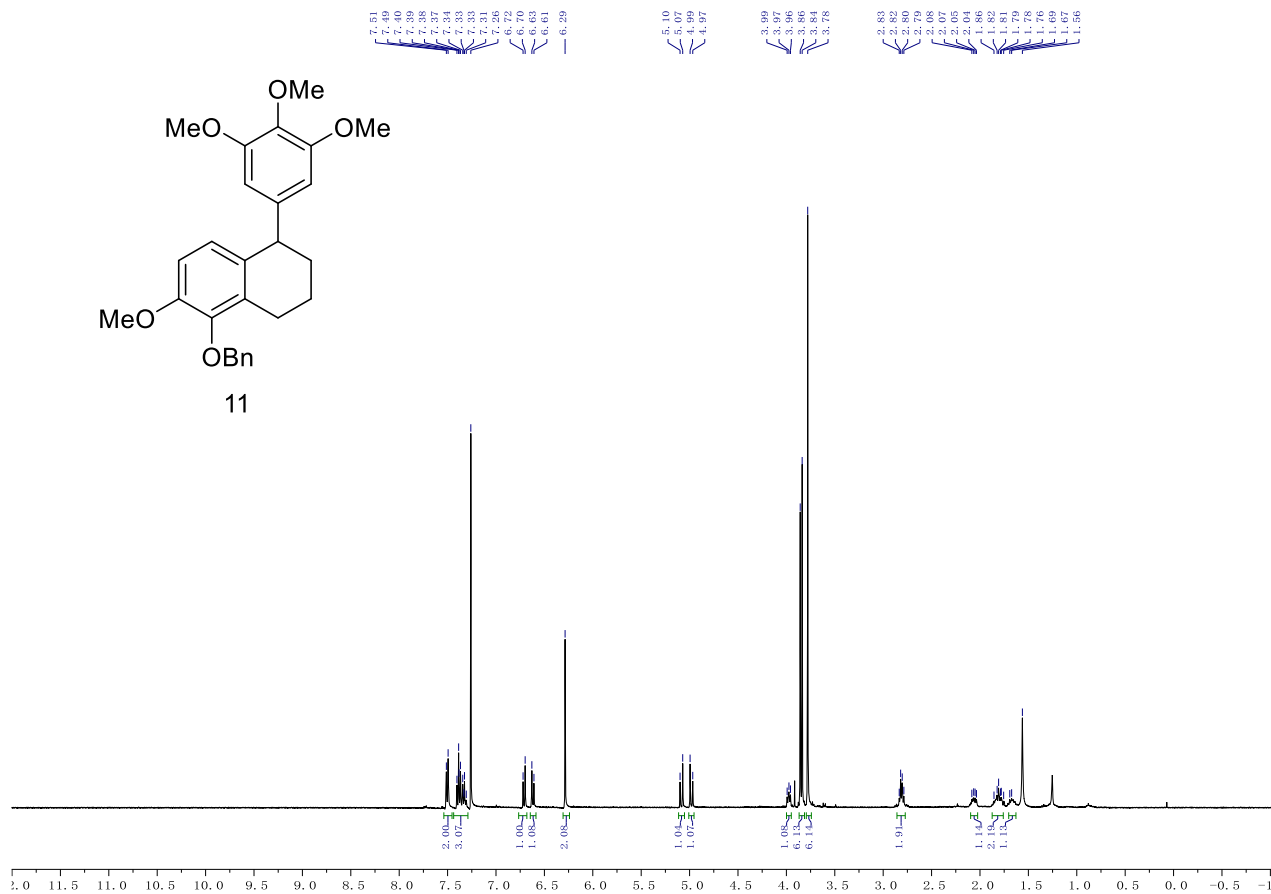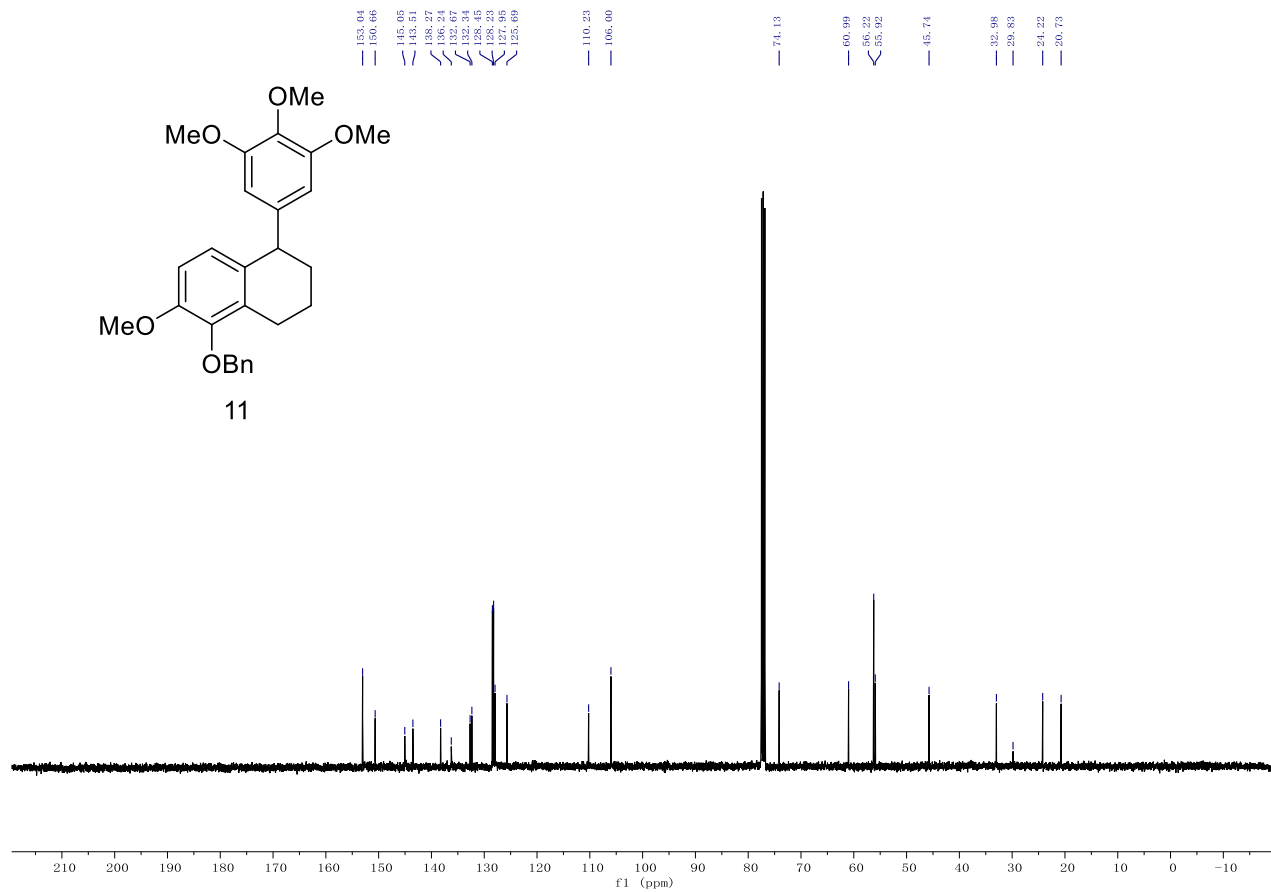

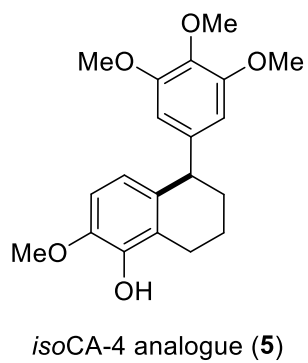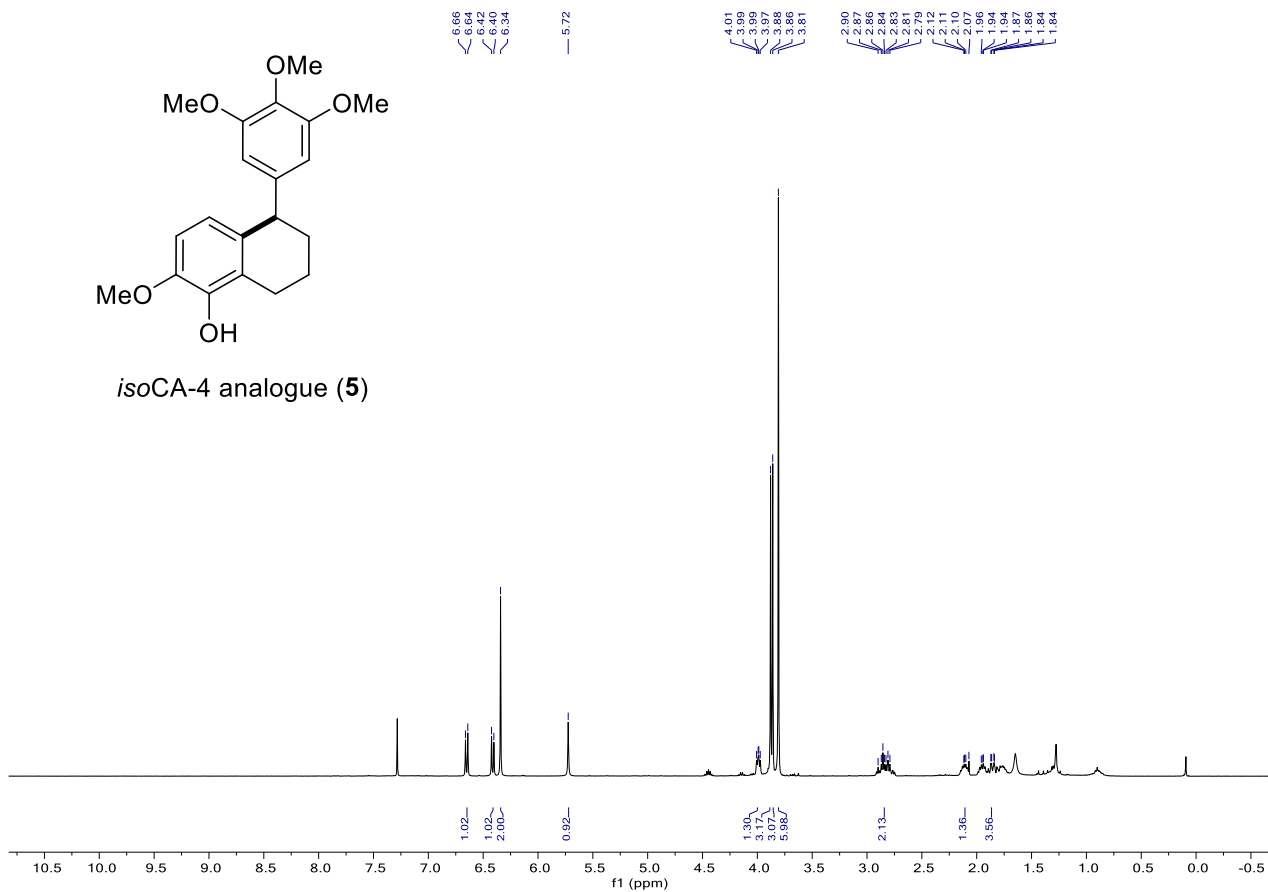

Supplement: d2qo00229a1.pdf [file d2qo00229a1.pdf]
